# Supplementary material for: Palladium-catalyzed asymmetric allenylic alkylation: construction of multiple chiral thiochromanone derivatives
Source: Royal Society of Chemistry journal article supplement (doi:10.1039/d3sc01060k), 2023-01-01
Supplement: d3sc01060k1.pdf [file d3sc01060k1.pdf]

## Supporting Information

### **Palladium-Catalyzed Asymmetric Allenylic Alkylation: Construction of Multiple Chiral Thiochromanone Derivatives**

*Li-Xia Liu, Yu-Qing Bai, Xiang Li, Chang-Bin Yu\* and Yong-Gui Zhou\**

*State Key Laboratory of Catalysis, Dalian Institute of Chemical Physics, Chinese Academy of Sciences, Dalian 116023, P. R. China; University of Chinese Academy of Sciences, Beijing 100049, P. R. China*

*Email: cbyu@dicp.ac.cn; ygzhou@dicp.ac.cn*

#### **Table of Contents**

|                                                                    |                |
|--------------------------------------------------------------------|----------------|
| <b>1. General and Materials.....</b>                               | <b>S1</b>      |
| <b>2. Synthesis of Substrates.....</b>                             | <b>S1-10</b>   |
| <b>3. Palladium-Catalyzed Asymmetric Allenylic Alkylation.....</b> | <b>S11-21</b>  |
| <b>4. Scale-up Synthesis.....</b>                                  | <b>S22</b>     |
| <b>5. Product Elaborations.....</b>                                | <b>S23-26</b>  |
| <b>6. Determination of Absolute Configuration.....</b>             | <b>S27-28</b>  |
| <b>7. References.....</b>                                          | <b>S29</b>     |
| <b>8. Copy of NMR and HPLC Spectra.....</b>                        | <b>S30-206</b> |

## 1. General and Materials

**General:** All reactions were carried out under an atmosphere of nitrogen using the standard Schlenk techniques, unless otherwise noted. Solvents were treated prior to use according to the standard methods.  $^1\text{H}$  NMR,  $^{13}\text{C}$  NMR and  $^{19}\text{F}$  NMR spectra were recorded at room temperature in  $\text{CDCl}_3$  on 400 MHz and 700 MHz instrument with TMS as internal standard. Enantiomeric excess was determined by HPLC analysis, using chiral column described below in detail. Optical rotations were measured by polarimeter. Flash column chromatography was performed on silica gel (200-300 mesh). The heat source for all heating reactions is the oil bath. High-resolution mass spectrometry (HRMS) was measured on an electrospray ionization (ESI) apparatus using the time-of-flight (TOF) mass spectrometry. All reactions were monitored by TLC analysis.

**Materials:** Commercially available reagents and solvents were used throughout without further purification.

## 2. Synthesis of Substrates

### 2.1. The Synthesis of Thiochromanone Derivatives

The thiochromanone derivatives **1a-c** and **1e-1p** were synthesized from (substituted) 2-mercaptobenzaldehydes and  $\alpha,\beta$ -unsaturated ester through two steps according to the known procedure,<sup>1</sup> all of which are the new compounds. Firstly, the known 2-mercaptobenzaldehydes **S1** underwent the organocatalytic domino sulfa-Michael-aldol reactions with  $\alpha,\beta$ -unsaturated ester **S2** to provide the intermediate alcohols. Then, the desired thiochromanone derivatives **1** could be synthesized through the oxidation with PCC.

Besides, thiochromanone derivative with amide group **1d** was synthesized through exchange from the thiochromanone **1c** and piperidine according to the known procedure.<sup>2</sup>

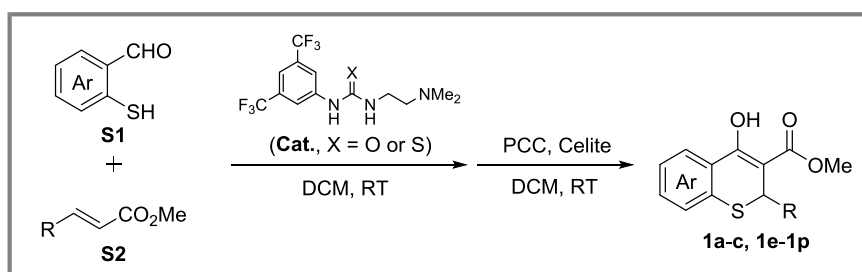

**General Procedure:** To a solution of (substituted) 2-mercaptobenzaldehydes **S1** (7.0 mmol) in dichloromethane (60 mL) was added organocatalyst (1.4 mmol, 20 mol%) and  $\alpha,\beta$ -unsaturated esters **S2** (9.1 mmol) sequentially under nitrogen atmosphere. The reaction mixture was stirred at room temperature for about 48-120 h. The reaction was complete as monitored by TLC. Then the reaction mixture was concentrated under the reduced pressure to obtain the crude residue. The residue was purified by flash chromatography on silica gel using hexanes/ethyl acetate (20/1-10/1) as eluent to give the intermediate alcohol compounds.

To a solution of pyridinium chlorochromate (PCC, 2.5 equiv.) in dichloromethane (0.1 M) was added celite (equal in quality to PCC) and the obtained alcohol compounds at ambient temperature. TLC analysis indicated completion of the reactions after about 5-8 h. After filtration through celite, the volatiles were removed under the reduced pressure. The residue was purified by flash chromatography on silica gel using hexanes/ethyl acetate (50/1) as eluent to give the desirable thiochromanone derivatives **1**.

---

**3-Nitro-2-phenylthiochroman-4-one (1a):**

0.243 g, 30% yield (two steps), orange solid, mp 173-174 °C, new compound,  $R_f = 0.05$  (hexanes/ethyl acetate 3/1), keto.  $^1\text{H NMR}$  (400 MHz,  $\text{CDCl}_3$ )  $\delta$  8.18 (d,  $J = 7.6$  Hz, 1H), 7.56-7.45 (m, 3H), 7.42-7.34 (m, 3H), 7.34-7.26 (m, 2H), 6.13 (d,  $J = 13.1$  Hz, 1H), 5.27 (d,  $J = 13.1$  Hz, 1H).  $^{13}\text{C NMR}$  (100 MHz,  $\text{CDCl}_3$ )  $\delta$  184.0, 140.6, 135.2, 133.0, 130.7, 129.9, 129.4, 128.9, 128.0, 126.9, 126.2, 95.1, 48.3. HRMS Calculated for  $\text{C}_{15}\text{H}_{12}\text{NO}_3\text{S}$   $[\text{M}+\text{H}]^+$  286.0532, found: 286.0533.

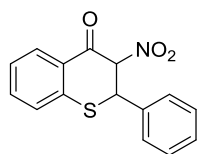

---

**1-(4-Hydroxy-2-phenyl-2H-thiochromen-3-yl)ethan-1-one (1b):**

0.324 g, 41% yield (two steps), yellow viscous liquid, new compound,  $R_f = 0.79$  (hexanes/ethyl acetate 3/1), enol.  $^1\text{H NMR}$  (400 MHz,  $\text{CDCl}_3$ )  $\delta$  8.05 (dd,  $J = 7.8, 1.5$  Hz, 1H), 7.29-7.25 (m, 1H), 7.25-7.15 (m, 6H), 7.15-7.08 (m, 1H), 4.99 (s, 1H), 2.18 (s, 3H).  $^{13}\text{C NMR}$  (100 MHz,  $\text{CDCl}_3$ )  $\delta$  198.2, 173.9, 142.0, 134.5, 132.3, 129.3, 128.7, 128.0, 127.7, 127.5, 126.8, 125.9, 106.0, 42.0, 25.2. HRMS Calculated for  $\text{C}_{17}\text{H}_{15}\text{O}_2\text{S}$   $[\text{M}+\text{H}]^+$  283.0787, found: 283.0788.

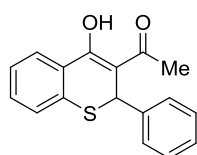

---

**Methyl 4-hydroxy-2-phenyl-2H-thiochromene-3-carboxylate (1c):**

1.126 g, 39% yield (two steps), pale yellow viscous liquid, new compound,  $R_f = 0.47$  (hexanes/ethyl acetate 20/1), enol/keto = 14.3/1. The enol isomer:  $^1\text{H NMR}$  (400 MHz,  $\text{CDCl}_3$ )  $\delta$  13.04 (s, 1H), 8.01-7.92 (m, 1H), 7.25-7.12 (m, 8H), 5.12 (s, 1H), 3.77 (s, 3H).  $^{13}\text{C NMR}$  (100 MHz,  $\text{CDCl}_3$ )  $\delta$  171.8, 166.1, 142.7, 134.2, 131.4, 128.5, 127.8, 127.4, 126.6, 126.5, 125.6, 96.9, 52.3, 39.6. HRMS Calculated for  $\text{C}_{17}\text{H}_{15}\text{O}_3\text{S}$   $[\text{M}+\text{H}]^+$  299.0736, found: 299.0742.

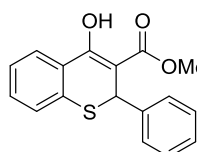

---

**Methyl 4-hydroxy-2-(o-tolyl)-2H-thiochromene-3-carboxylate (1e):**

0.701 g, 32% yield (two steps), pale yellow solid, mp 115-116 °C, new compound,  $R_f = 0.62$  (hexanes/ethyl acetate 20/1), enol/keto = 12.5/1. The enol isomer:  $^1\text{H NMR}$  (400 MHz,  $\text{CDCl}_3$ )  $\delta$  13.08 (s, 1H), 8.06-7.95 (m, 1H), 7.24-7.19 (m, 2H), 7.17-7.14 (m, 1H), 7.12-7.04 (m, 2H), 6.98-6.89 (m, 2H), 5.32 (s, 1H), 3.71 (s, 3H), 2.49 (s, 3H).  $^{13}\text{C NMR}$  (100 MHz,  $\text{CDCl}_3$ )  $\delta$  171.8, 166.6, 139.8, 134.3, 133.9, 131.4, 130.8, 128.6, 128.1, 127.4, 126.5, 126.2, 126.1, 125.7, 96.5, 52.4, 35.7, 19.7. HRMS Calculated for  $\text{C}_{18}\text{H}_{17}\text{O}_3\text{S}$   $[\text{M}+\text{H}]^+$  313.0893, found: 313.0890.

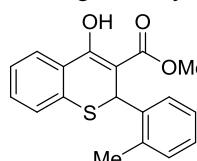

---

**Methyl 4-hydroxy-2-(m-tolyl)-2H-thiochromene-3-carboxylate (1f):**

0.575 g, 26% yield (two steps), pale yellow viscous liquid, new compound,  $R_f = 0.62$  (hexanes/ethyl acetate 20/1), enol/keto = 14.3/1. The enol isomer:  $^1\text{H NMR}$  (400 MHz,  $\text{CDCl}_3$ )  $\delta$  13.05 (s, 1H), 8.03-7.87 (m, 1H), 7.25-7.14 (m, 3H), 7.11-6.94 (m, 4H), 5.09 (s, 1H), 3.75 (s, 3H), 2.24 (s, 3H).  $^{13}\text{C NMR}$  (100 MHz,  $\text{CDCl}_3$ )  $\delta$  171.9, 166.1, 142.6, 138.1, 134.2, 131.4, 128.5, 128.3, 128.3, 127.8, 127.4, 126.5, 125.6, 123.7, 96.8, 52.3, 39.6, 21.5. HRMS Calculated for  $\text{C}_{18}\text{H}_{17}\text{O}_3\text{S}$   $[\text{M}+\text{H}]^+$  313.0893, found: 313.0889.

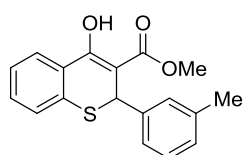

---

**Methyl 4-hydroxy-2-(*p*-tolyl)-2*H*-thiochromene-3-carboxylate (1g):**

0.362 g, 17% yield (two steps), pale yellow viscous liquid, new compound,  $R_f = 0.62$  (hexanes/ethyl acetate 20/1), enol/keto = 14.3/1. The enol isomer:  $^1\text{H}$  NMR (400 MHz,  $\text{CDCl}_3$ )  $\delta$  13.03 (s, 1H), 8.01-7.92 (m, 1H), 7.24-7.14 (m, 3H), 7.08 (d,  $J = 8.1$  Hz, 2H), 6.99 (d,  $J = 8.0$  Hz, 2H), 5.10 (s, 1H), 3.76 (s, 3H), 2.24 (s, 3H).  $^{13}\text{C}$  NMR (100 MHz,  $\text{CDCl}_3$ )  $\delta$  171.9, 166.0, 139.8, 137.2, 134.2, 131.4, 129.2, 128.5, 127.8, 126.5, 126.5, 125.6, 97.0, 52.3, 39.4, 21.1. HRMS Calculated for  $\text{C}_{18}\text{H}_{17}\text{O}_3\text{S}$   $[\text{M}+\text{H}]^+$  313.0893, found: 313.0891.

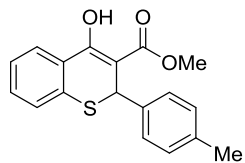

---

**Methyl 2-(4-fluorophenyl)-4-hydroxy-2*H*-thiochromene-3-carboxylate (1h):**

0.582 g, 26% yield (two steps), pale yellow viscous liquid, new compound,  $R_f = 0.50$  (hexanes/ethyl acetate 20/1), enol/keto = 20.0/1. The enol isomer:  $^1\text{H}$  NMR (400 MHz,  $\text{CDCl}_3$ )  $\delta$  13.02 (s, 1H), 8.00-7.93 (m, 1H), 7.30-7.14 (m, 5H), 6.90-6.83 (m, 2H), 5.10 (s, 1H), 3.77 (s, 3H).  $^{13}\text{C}$  NMR (100 MHz,  $\text{CDCl}_3$ )  $\delta$  171.7, 166.1, 162.1 (d,  $^1J_{\text{F-C}} = 246.0$  Hz), 138.5 (d,  $^4J_{\text{F-C}} = 3.0$  Hz), 133.9, 131.5, 128.4, 128.2 (d,  $^3J_{\text{F-C}} = 8.3$  Hz), 127.9, 126.5, 125.8, 115.3 (d,  $^2J_{\text{F-C}} = 21.7$  Hz), 97.0, 52.4, 39.0.  $^{19}\text{F}$  NMR (376 MHz,  $\text{CDCl}_3$ )  $\delta$  -115.11. HRMS Calculated for  $\text{C}_{17}\text{H}_{14}\text{FO}_3\text{S}$   $[\text{M}+\text{H}]^+$  317.0642, found: 317.0643.

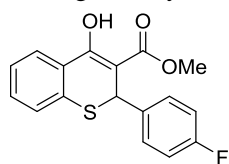

---

**Methyl 2-(4-chlorophenyl)-4-hydroxy-2*H*-thiochromene-3-carboxylate (1i):**

0.895 g, 38% yield (two steps), pale yellow viscous liquid, new compound,  $R_f = 0.50$  (hexanes/ethyl acetate 20/1), enol/keto = 14.3/1. The enol isomer:  $^1\text{H}$  NMR (400 MHz,  $\text{CDCl}_3$ )  $\delta$  13.02 (s, 1H), 7.98-7.93 (m, 1H), 7.29-7.20 (m, 2H), 7.18-7.09 (m, 5H), 5.08 (s, 1H), 3.77 (s, 3H).  $^{13}\text{C}$  NMR (100 MHz,  $\text{CDCl}_3$ )  $\delta$  171.6, 166.2, 141.2, 133.7, 133.2, 131.6, 128.6, 128.3, 128.0, 127.9, 126.6, 125.8, 96.7, 52.4, 39.0. HRMS Calculated for  $\text{C}_{17}\text{H}_{14}\text{ClO}_3\text{S}$   $[\text{M}+\text{H}]^+$  333.0347 ( $^{35}\text{Cl}$ ) and 335.0321 ( $^{37}\text{Cl}$ ), found: 333.0350 ( $^{35}\text{Cl}$ ) and 335.0324 ( $^{37}\text{Cl}$ ).

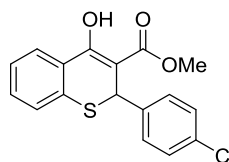

---

**Methyl 2-(4-bromophenyl)-4-hydroxy-2*H*-thiochromene-3-carboxylate (1j):**

1.272 g, 48% yield (two steps), pale yellow viscous liquid, new compound,  $R_f = 0.50$  (hexanes/ethyl acetate 20/1), enol/keto = 25.0/1. The enol isomer:  $^1\text{H}$  NMR (400 MHz,  $\text{CDCl}_3$ )  $\delta$  13.02 (s, 1H), 8.02-7.87 (m, 1H), 7.32-7.14 (m, 5H), 7.12-6.99 (m, 2H), 5.06 (s, 1H), 3.77 (s, 3H).  $^{13}\text{C}$  NMR (100 MHz,  $\text{CDCl}_3$ )  $\delta$  171.6, 166.2, 141.7, 133.7, 131.6, 131.6, 128.4, 128.3, 127.9, 126.6, 125.9, 121.4, 96.6, 52.4, 39.1. HRMS Calculated for  $\text{C}_{17}\text{H}_{14}\text{BrO}_3\text{S}$   $[\text{M}+\text{H}]^+$  376.9842 ( $^{79}\text{Br}$ ) and 378.9822 ( $^{81}\text{Br}$ ), found: 376.9844 ( $^{79}\text{Br}$ ) and 378.9832 ( $^{81}\text{Br}$ ).

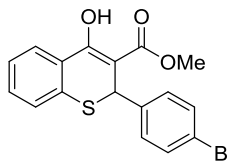

---

**Methyl 4-hydroxy-2-(4-methoxyphenyl)-2*H*-thiochromene-3-carboxylate (1k):**

0.555 g, 34% yield (two steps, 1.0 equivalent amount of organocatalyst was used), light yellow liquid, new compound,  $R_f = 0.42$  (hexanes/ethyl acetate 20/1), enol/keto = 11.1/1. The enol isomer:  $^1\text{H}$  NMR (400 MHz,  $\text{CDCl}_3$ )  $\delta$  13.01 (s, 1H), 7.96 (dd,  $J = 7.7, 1.5$  Hz, 1H), 7.26-7.16 (m, 3H), 7.14-7.07 (m, 2H), 6.76-6.68 (m,

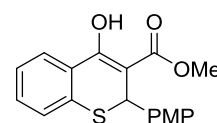

2H), 5.09 (s, 1H), 3.77 (s, 3H), 3.71 (s, 3H).  $^{13}\text{C}$  NMR (100 MHz,  $\text{CDCl}_3$ )  $\delta$  171.9, 165.9, 158.9, 134.9, 134.2, 131.4, 128.5, 127.9, 127.7, 126.4, 125.6, 113.8, 97.2, 55.2, 52.3, 39.1. HRMS Calculated for  $\text{C}_{18}\text{H}_{16}\text{NaO}_4\text{S}$   $[\text{M}+\text{Na}]^+$  351.0662, found: 351.0665.

---

**Methyl 4-hydroxy-2-methyl-2H-thi chromene-3-carboxylate (1l):**

0.488 g, 42% yield (two steps), pale yellow viscous liquid, new compound,  $R_f = 0.67$  (hexanes/ethyl acetate 20/1), enol/keto = 11.1/1. The enol isomer:  $^1\text{H}$  NMR (400 MHz,  $\text{CDCl}_3$ )  $\delta$  12.67 (s, 1H), 7.95-7.81 (m, 1H), 7.34-7.26 (m, 2H), 7.24-7.19 (m, 1H), 4.02 (q,  $J = 6.9$  Hz, 1H), 3.86 (s, 3H), 1.35 (d,  $J = 6.9$  Hz, 3H).  $^{13}\text{C}$  NMR (100 MHz,  $\text{CDCl}_3$ )  $\delta$  171.6, 164.5, 134.6, 131.1, 128.2, 128.0, 126.5, 125.4, 100.0, 52.1, 31.9, 23.1. HRMS Calculated for  $\text{C}_{12}\text{H}_{16}\text{NO}_3\text{S}$   $[\text{M}+\text{NH}_4]^+$  254.0845, found: 254.0846.

---

**Methyl 4-hydroxy-6-nitro-2-phenyl-2H-thi chromene-3-carboxylate (1m):**

0.296 g, 12% yield (two steps), pale yellow solid, mp 182-183 °C, new compound,  $R_f = 0.34$  (hexanes/ethyl acetate 20/1), enol.  $^1\text{H}$  NMR (400 MHz,  $\text{CDCl}_3$ )  $\delta$  13.04 (s, 1H), 8.82 (d,  $J = 2.5$  Hz, 1H), 8.08 (dd,  $J = 8.7, 2.5$  Hz, 1H), 7.30 (d,  $J = 8.7$  Hz, 1H), 7.25-7.08 (m, 5H), 5.25 (s, 1H), 3.80 (s, 3H).  $^{13}\text{C}$  NMR (100 MHz,  $\text{CDCl}_3$ )  $\delta$  171.3, 163.8, 145.7, 143.3, 141.8, 128.8, 128.7, 128.2, 128.0, 126.5, 125.4, 121.7, 97.6, 52.7, 40.1. HRMS Calculated for  $\text{C}_{17}\text{H}_{14}\text{NO}_5\text{S}$   $[\text{M}+\text{H}]^+$  344.0587, found: 344.0589.

---

**Methyl 4-hydroxy-6-methoxy-2-phenyl-2H-thi chromene-3-carboxylate (1n):**

0.092 g, 9% yield (two steps), pale yellow viscous liquid, new compound,  $R_f = 0.54$  (hexanes/ethyl acetate 20/1), enol/keto = 12.5/1. The enol isomer:  $^1\text{H}$  NMR (400 MHz,  $\text{CDCl}_3$ )  $\delta$  13.07 (s, 1H), 7.51 (d,  $J = 2.8$  Hz, 1H), 7.23-7.10 (m, 5H), 7.06 (d,  $J = 8.6$  Hz, 1H), 6.84 (dd,  $J = 8.6, 2.8$  Hz, 1H), 5.09 (s, 1H), 3.82 (s, 3H), 3.76 (s, 3H).  $^{13}\text{C}$  NMR (100 MHz,  $\text{CDCl}_3$ )  $\delta$  171.9, 166.1, 157.9, 142.6, 129.5, 128.9, 128.4, 127.4, 126.7, 124.8, 118.7, 110.9, 97.5, 55.5, 52.3, 39.6. HRMS Calculated for  $\text{C}_{18}\text{H}_{16}\text{NaO}_4\text{S}$   $[\text{M}+\text{Na}]^+$  351.0662, found: 351.0657.

---

**Methyl 4-hydroxy-6-methyl-2-phenyl-2H-thi chromene-3-carboxylate (1o):**

0.994 g, 40% yield (two steps), pale yellow solid, mp 143-144 °C, new compound,  $R_f = 0.59$  (hexanes/ethyl acetate 20/1), enol/keto = 11.1/1. The enol isomer:  $^1\text{H}$  NMR (400 MHz,  $\text{CDCl}_3$ )  $\delta$  13.05 (s, 1H), 7.78 (s, 1H), 7.23-7.10 (m, 5H), 7.10-7.01 (m, 2H), 5.10 (s, 1H), 3.76 (s, 3H), 2.34 (s, 3H).  $^{13}\text{C}$  NMR (100 MHz,  $\text{CDCl}_3$ )  $\delta$  171.9, 166.3, 142.8, 135.5, 132.4, 130.6, 128.4, 128.3, 127.7, 127.4, 126.9, 126.6, 97.0, 52.3, 39.6, 21.1. HRMS Calculated for  $\text{C}_{18}\text{H}_{17}\text{O}_3\text{S}$   $[\text{M}+\text{H}]^+$  313.0893, found: 313.0892.

---

**tert-Butyl 4-hydroxy-2-phenyl-2H-thi chromene-3-carboxylate (1p):**

0.250 g, 8% yield (two steps), pale yellow viscous liquid, new compound,  $R_f = 0.62$  (hexanes/ethyl acetate 20/1), enol/keto = 2.5/1. The enol and keto mixture:  $^1\text{H}$  NMR (400 MHz,  $\text{CDCl}_3$ )  $\delta$  13.24 (s, 1H, enol), 8.15 (dd,  $J = 8.0, 1.2$  Hz, 1H, keto), 7.95 (dd,  $J = 7.7, 1.5$  Hz, 1H, enol),

7.45-7.16 (m, 16H, enol and keto), 5.05 (s, 1H, enol), 4.93 (d,  $J = 12.6$  Hz, 1H, keto), 4.19 (d,  $J = 12.6$  Hz, 1H, keto), 1.42 (s, 9H, enol), 1.23 (s, 9H, keto).  $^{13}\text{C}$  NMR (100 MHz,  $\text{CDCl}_3$ )  $\delta$  190.9, 171.3, 166.9, 165.3, 143.5, 141.5, 136.5, 134.0, 133.9, 131.1, 129.9, 129.7, 128.8, 128.8, 128.7, 128.4, 128.3, 127.6, 127.3, 126.9, 126.4, 126.3, 125.5, 125.4, 98.6, 82.6, 82.2, 62.6, 47.6, 40.2, 28.1, 27.6. HRMS Calculated for  $\text{C}_{20}\text{H}_{21}\text{O}_3\text{S}$   $[\text{M}+\text{H}]^+$  341.1206, found: 341.1203.

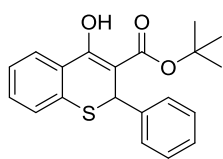

#### Methyl 2-(benzofuran-2-yl)-4-hydroxy-2H-thiochromene-3-carboxylate (**1q**):

0.732 g, 23% yield (two steps), yellow solid, mp 146-147 °C, new compound,  $R_f = 0.51$  (hexanes/ethyl acetate 20/1), enol.  $^1\text{H}$  NMR (400 MHz,  $\text{CDCl}_3$ )  $\delta$  13.03 (s, 1H), 7.98 (dd,  $J = 7.3, 1.8$  Hz, 1H), 7.38 (dd,  $J = 18.4, 8.0$  Hz, 2H), 7.27-7.17 (m, 4H), 7.14-7.09 (m, 1H), 6.30 (s, 1H), 5.31 (s, 1H), 3.80 (s, 3H).  $^{13}\text{C}$  NMR (100 MHz,  $\text{CDCl}_3$ )  $\delta$  171.5, 166.5, 156.5, 155.1, 133.9, 131.6, 128.2, 128.1, 128.0, 126.8, 125.9, 124.3, 122.7, 120.8, 111.3, 104.8, 94.8, 52.4, 34.4. HRMS Calculated for  $\text{C}_{19}\text{H}_{14}\text{NaO}_4\text{S}$   $[\text{M}+\text{Na}]^+$  361.0505, found: 361.0499.

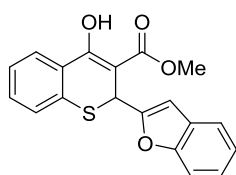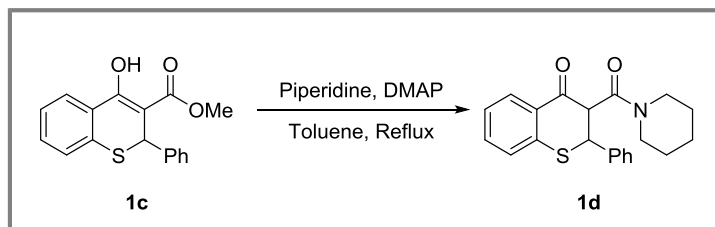

To a solution of thiochromanone derivative **1c** (2.5 mmol, 0.746 g) in toluene (25 mL) was added the piperidine (5.0 mmol, 0.426 g) and 4-dimethylaminopyridine (DMAP) (1.0 mmol, 0.122 g) sequentially. The mixture was refluxed for 24 hours. After cooling to room temperature, the reaction mixture was concentrated under reduced pressure to afford the crude residue. The residue was purified by flash chromatography on silica gel using hexanes/ethyl acetate/dichloromethane (20/1/1-3/1/1) as eluent to give the desirable thiochromanone derivative with amide **1d**.

#### 2-Phenyl-3-(piperidine-1-carbonyl)thiochroman-4-one (**1d**):

0.335 g, 38% yield, white solid, mp 202-203 °C, new compound,  $R_f = 0.43$  (hexanes/ethyl acetate 3/1), keto.  $^1\text{H}$  NMR (400 MHz,  $\text{CDCl}_3$ )  $\delta$  8.12 (dd,  $J = 8.0, 1.3$  Hz, 1H), 7.51-7.40 (m, 3H), 7.38-7.26 (m, 4H), 7.25-7.18 (m, 1H), 5.27 (d,  $J = 12.5$  Hz, 1H), 4.54 (d,  $J = 12.5$  Hz, 1H), 3.71-3.55 (m, 1H), 3.53-3.41 (m, 1H), 3.39-3.30 (m, 1H), 3.29-3.11 (m, 1H), 1.65-1.37 (m, 4H), 1.27-1.04 (m, 2H).  $^{13}\text{C}$  NMR (100 MHz,  $\text{CDCl}_3$ )  $\delta$  192.0, 166.0, 141.5, 137.3, 133.9, 130.5, 129.9, 128.8, 128.5, 128.1, 127.2, 125.5, 58.5, 48.5, 47.5, 43.1, 26.3, 25.5, 24.5. HRMS Calculated for  $\text{C}_{21}\text{H}_{22}\text{NO}_2\text{S}$   $[\text{M}+\text{H}]^+$  352.1366, found: 352.1367.

## 2.2. Synthesis of Allenylic Carbonates

The allenylic carbonates **2a-2m** could be conveniently synthesized from the commercially available propargyl alcohol and aldehydes through two steps according to the known procedure,<sup>3,4</sup> all of which are new compounds. Firstly, the propargyl alcohol underwent copper-catalyzed reactions with aldehydes to provide the intermediate allenylic alcohols.<sup>3</sup> Then, the allenylic carbonates **2** were prepared from the above allenylic alcohol intermediates according to the known literature procedure with slight modification.<sup>4</sup> In addition, allenylic carbonate **2n**, a new compound, could be synthesized through two steps according to the known procedure.<sup>4,5</sup> Firstly, the propargylic dioxolanone **S1** underwent copper-catalyzed S<sub>N</sub>2' substitution with Grignard reagent to provide the intermediate  $\alpha$ -hydroxyallene.<sup>5</sup> Then, the allenylic carbonate **2n** was prepared from the above  $\alpha$ -hydroxyallene intermediate according to the known literature procedure with slight modification.<sup>4</sup>

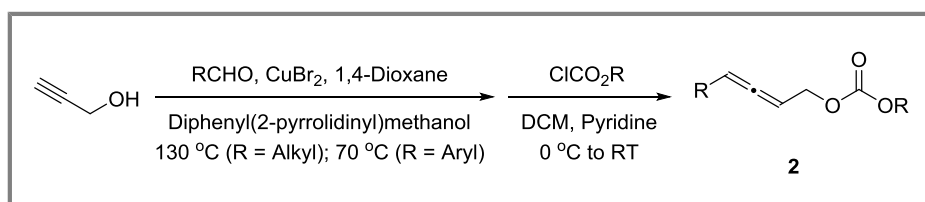

**General Procedure:** To a dried Schlenk flask were sequentially added copper dibromide (1.787 g, 8.0 mmol), diphenyl(2-pyrrolidinyl)methanol (5.067 g, 20 mmol), 1,4-dioxane (40 mL), aldehydes (30 mmol), and propargyl alcohol (1.682 g, 30 mmol) under the nitrogen atmosphere. The mixture was stirred in an oil bath preheated at 70 °C or 130 °C for 12-20 h. After cooling to room temperature, the resulting mixture was diluted with diethyl ether (60 mL), which was washed with an aqueous solution of hydrochloric acid (3.0 M, 60 mL). After separation, the aqueous layer was extracted with diethyl ether (60 mL $\times$ 3). The combined organic layer was dried over anhydrous sodium sulfate, filtered and concentrated under the reduced pressure. The residue was purified by flash chromatography on silica gel using hexanes/ethyl acetate (20/1-5/1) as eluent to afford the intermediate allenylic alcohols.

A solution of the above allenylic alcohols (9.7 mmol) and pyridine (2.34 mL, 29.1 mmol) in dichloromethane (25 mL) was cooled to 0 °C. The ethyl chloroformate (1.85 mL, 19.4 mmol) (or isopropyl chloroformate) was added dropwise over a period of 5 minutes. The reaction mixture was allowed to warm to room temperature. When the reaction was completed as monitored by TLC, the reaction mixture was acidified with the hydrogen chloride aqueous solution (3.0 M) to pH 5-6 and extracted three times with dichloromethane. The combined organic layer was dried over anhydrous sodium sulfate, filtered and concentrated under the reduced pressure. The residue was purified by flash chromatography on silica gel using hexanes/ethyl acetate (50/1) as eluent to give the desirable allenylic carbonates **2**.

### Ethyl (4-phenylbuta-2,3-dien-1-yl) carbonate (**2a**):

0.184 g, 24% yield (two steps), yellow liquid, new compound,  $R_f = 0.49$  (hexanes/ethyl acetate 10/1). <sup>1</sup>H NMR (400 MHz, CDCl<sub>3</sub>)  $\delta$  7.33-7.28 (m, 4H), 7.25-7.14 (m, 1H), 6.37-6.28 (m, 1H), 5.84-5.68 (m, 1H), 4.78-4.67 (m, 2H), 4.20 (q,  $J = 7.1$  Hz, 2H), 1.29 (t,  $J = 7.1$  Hz, 3H). <sup>13</sup>C NMR (100 MHz, CDCl<sub>3</sub>)  $\delta$  206.7, 155.0, 133.2, 128.7, 127.4, 127.1, 96.7, 90.8, 65.1, 64.2, 14.3. HRMS Calculated for

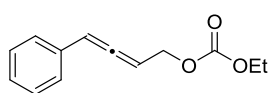

C<sub>13</sub>H<sub>18</sub>NO<sub>3</sub> [M+NH<sub>4</sub>]<sup>+</sup> 236.1281, found: 236.1280.

---

**Isopropyl (4-phenylbuta-2,3-dien-1-yl) carbonate (2a'')**

1.120 g, 45% yield (two steps), yellow liquid, new compound, R<sub>f</sub> = 0.56 (hexanes/ethyl acetate 20/1). <sup>1</sup>H NMR (400 MHz, CDCl<sub>3</sub>) δ 7.33-7.27 (m, 4H), 7.25-7.19 (m, 1H), 6.37-6.26 (m, 1H), 5.83-5.64 (m, 1H), 4.92-4.83 (m, 1H), 4.76-4.66 (m, 2H), 1.30 (d, *J* = 6.3 Hz, 3H), 1.26 (d, *J* = 6.3 Hz, 3H). <sup>13</sup>C NMR (100 MHz, CDCl<sub>3</sub>) δ 206.6, 154.5, 133.2, 128.7, 127.4, 127.1, 96.7, 90.9, 72.2, 64.9, 21.8, 21.7. HRMS Calculated for C<sub>14</sub>H<sub>16</sub>NaO<sub>3</sub> [M+Na]<sup>+</sup> 255.0992, found: 255.0993.

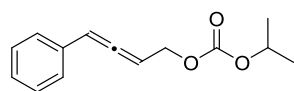

**Ethyl (4-(*o*-tolyl)buta-2,3-dien-1-yl) carbonate (2b):**

0.191 g, 4% yield (two steps), yellow liquid, new compound, R<sub>f</sub> = 0.53 (hexanes/ethyl acetate 20/1). <sup>1</sup>H NMR (400 MHz, CDCl<sub>3</sub>) δ 7.39-7.32 (m 1H), 7.18-7.10 (m, 3H), 6.58-6.43 (m, 1H), 5.72 (q, *J* = 6.7 Hz, 1H), 4.77-4.69 (m, 2H), 4.21 (q, *J* = 7.1 Hz, 2H), 2.36 (s, 3H), 1.30 (t, *J* = 7.1 Hz, 3H). <sup>13</sup>C NMR (100 MHz, CDCl<sub>3</sub>) δ 207.4, 155.0, 135.3, 131.4, 130.5, 127.6, 127.4, 126.2, 94.0, 89.8, 65.4, 64.2, 19.9, 14.3. HRMS Calculated for C<sub>14</sub>H<sub>17</sub>O<sub>3</sub> [M+H]<sup>+</sup> 233.1172, found: 233.1174.

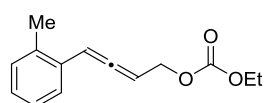

**Ethyl (4-(*m*-tolyl)buta-2,3-dien-1-yl) carbonate (2c):**

1.212 g, 26% yield (two steps), yellow liquid, new compound, R<sub>f</sub> = 0.53 (hexanes/ethyl acetate 20/1). <sup>1</sup>H NMR (400 MHz, CDCl<sub>3</sub>) δ 7.20 (t, *J* = 7.5 Hz, 1H), 7.13-7.07 (m, 2H), 7.04 (d, *J* = 7.5 Hz, 1H), 6.33-6.25 (m, 1H), 5.80-5.69 (m, 1H), 4.77-4.68 (m, 2H), 4.20 (q, *J* = 7.1 Hz, 2H), 2.33 (s, 3H), 1.30 (t, *J* = 7.1 Hz, 3H). <sup>13</sup>C NMR (100 MHz, CDCl<sub>3</sub>) δ 206.7, 155.0, 138.3, 133.0, 128.6, 128.3, 127.7, 124.2, 96.7, 90.6, 65.3, 64.2, 21.4, 14.3. HRMS Calculated for C<sub>14</sub>H<sub>16</sub>NaO<sub>3</sub> [M+Na]<sup>+</sup> 255.0992, found: 255.0994.

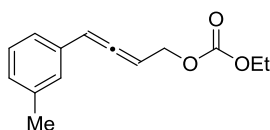

**Ethyl (4-(*p*-tolyl)buta-2,3-dien-1-yl) carbonate (2d):**

1.571 g, 34% yield (two steps), yellow liquid, new compound, R<sub>f</sub> = 0.53 (hexanes/ethyl acetate 20/1). <sup>1</sup>H NMR (400 MHz, CDCl<sub>3</sub>) δ 7.19 (d, *J* = 8.0 Hz, 2H), 7.12 (d, *J* = 8.0 Hz, 2H), 6.35-6.21 (m, 1H), 5.84-5.63 (m, 1H), 4.77-4.67 (m, 2H), 4.20 (q, *J* = 7.1 Hz, 2H), 2.33 (s, 3H), 1.30 (t, *J* = 7.1 Hz, 3H). <sup>13</sup>C NMR (100 MHz, CDCl<sub>3</sub>) δ 206.5, 155.0, 137.3, 130.1, 129.4, 127.0, 96.5, 90.6, 65.3, 64.2, 21.3, 14.3. HRMS Calculated for C<sub>14</sub>H<sub>16</sub>KO<sub>3</sub> [M+K]<sup>+</sup> 271.0731, found: 271.0732.

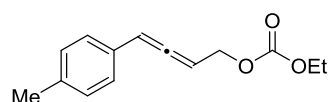

**Ethyl (4-(3-fluorophenyl)buta-2,3-dien-1-yl) carbonate (2e):**

1.775 g, 38% yield (two steps), yellow liquid, new compound, R<sub>f</sub> = 0.44 (hexanes/ethyl acetate 20/1). <sup>1</sup>H NMR (400 MHz, CDCl<sub>3</sub>) δ 7.29-7.26 (m, 1H), 7.06 (d, *J* = 7.7 Hz, 1H), 7.00 (d, *J* = 9.9 Hz, 1H), 6.96-6.86 (m, 1H), 6.36-6.22 (m, 1H), 5.90-5.64 (m, 1H), 4.78-4.68 (m, 2H), 4.20 (q, *J* = 7.1 Hz, 2H), 1.30 (t, *J* = 7.1 Hz, 3H). <sup>13</sup>C NMR (100 MHz, CDCl<sub>3</sub>) δ 206.8, 163.1 (d, <sup>1</sup>J<sub>F-C</sub> = 243.9 Hz), 154.9, 135.7 (d, <sup>3</sup>J<sub>F-C</sub> = 7.9 Hz), 130.1 (d, <sup>3</sup>J<sub>F-C</sub> = 8.3 Hz), 122.8 (d, <sup>4</sup>J<sub>F-C</sub> = 2.7 Hz), 114.3 (d, <sup>2</sup>J<sub>F-C</sub> = 21.4 Hz), 113.6 (d, <sup>2</sup>J<sub>F-C</sub> = 22.12 Hz), 96.1 (d, <sup>4</sup>J<sub>F-C</sub> = 2.6 Hz), 91.2, 64.8, 64.3, 14.3. <sup>19</sup>F NMR

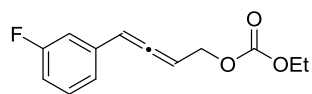



(376 MHz, CDCl<sub>3</sub>)  $\delta$  -113.32. The HRMS Calculated for C<sub>13</sub>H<sub>14</sub>FO<sub>3</sub> [M+H]<sup>+</sup> 237.0921, found: 237.0922.

---

**4-(3-Chlorophenyl)buta-2,3-dien-1-yl ethyl carbonate (2f):**

2.096 g, 42% yield (two steps), yellow liquid, new compound, R<sub>f</sub> = 0.39 (hexanes/ethyl acetate 20/1). <sup>1</sup>H NMR (400 MHz, CDCl<sub>3</sub>)  $\delta$  7.28 (s, 1H), 7.26-7.14 (m, 3H), 6.31-6.23 (m, 1H), 5.87-5.73 (m, 1H), 4.77-4.69 (m, 2H), 4.21 (q, *J* = 7.1 Hz, 2H), 1.30 (t, *J* = 7.1 Hz, 3H). <sup>13</sup>C NMR (100 MHz, CDCl<sub>3</sub>)  $\delta$  206.8, 154.9, 135.3, 134.6, 129.9, 127.4, 126.9, 125.2, 95.9, 91.3, 64.7, 64.3, 14.3. HRMS Calculated for C<sub>13</sub>H<sub>17</sub>ClNO<sub>3</sub> [M+NH<sub>4</sub>]<sup>+</sup> 270.0891 (<sup>35</sup>Cl) and 272.0866 (<sup>37</sup>Cl), found: 270.0889 (<sup>35</sup>Cl) and 272.0856 (<sup>37</sup>Cl).

---

**4-(3-Bromophenyl)buta-2,3-dien-1-yl ethyl carbonate (2g):**

2.252 g, 38% yield (two steps), yellow liquid, new compound, R<sub>f</sub> = 0.38 (hexanes/ethyl acetate 20/1). <sup>1</sup>H NMR (400 MHz, CDCl<sub>3</sub>)  $\delta$  7.43 (s, 1H), 7.38-7.30 (m, 1H), 7.23-7.13 (m, 2H), 6.37-6.15 (m, 1H), 5.88-5.69 (m, 1H), 4.77-4.68 (m, 2H), 4.21 (q, *J* = 7.1 Hz, 2H), 1.30 (t, *J* = 7.1 Hz, 3H). <sup>13</sup>C NMR (100 MHz, CDCl<sub>3</sub>)  $\delta$  206.7, 154.9, 135.5, 130.3, 130.1, 129.8, 125.7, 122.8, 95.8, 91.4, 64.7, 64.3, 14.3. HRMS Calculated for C<sub>13</sub>H<sub>17</sub>BrNO<sub>3</sub> [M+NH<sub>4</sub>]<sup>+</sup> 314.0386 (<sup>79</sup>Br) and 316.0367 (<sup>81</sup>Br), found: 314.0392 (<sup>79</sup>Br) and 316.0374 (<sup>81</sup>Br).

---

**Ethyl 4-(3-methoxyphenyl)buta-2,3-dien-1-yl carbonate (2h):**

1.390 g, 28% yield (two steps), yellow liquid, new compound, R<sub>f</sub> = 0.34 (hexanes/ethyl acetate 20/1). <sup>1</sup>H NMR (400 MHz, CDCl<sub>3</sub>)  $\delta$  7.22 (t, *J* = 7.9 Hz, 1H), 6.92-6.825 (m, 2H), 6.78 (dd, *J* = 8.2, 2.3 Hz, 1H), 6.33-6.22 (m, 1H), 5.83-5.65 (m, 1H), 4.77-4.68 (m, 2H), 4.19 (q, *J* = 7.1 Hz, 2H), 3.81 (s, 3H), 1.29 (t, *J* = 7.1 Hz, 3H). <sup>13</sup>C NMR (100 MHz, CDCl<sub>3</sub>)  $\delta$  206.7, 159.9, 154.9, 134.6, 129.6, 119.7, 113.3, 112.2, 96.7, 90.9, 65.1, 64.2, 55.2, 14.3. HRMS Calculated for C<sub>14</sub>H<sub>17</sub>O<sub>4</sub> [M+H]<sup>+</sup> 249.1121, found: 249.1119.

---

**4-(3,5-Dimethylphenyl)buta-2,3-dien-1-yl ethyl carbonate (2i):**

2.200 g, 45% yield (two steps), pale yellow liquid, new compound, R<sub>f</sub> = 0.45 (hexanes/ethyl acetate 20/1). <sup>1</sup>H NMR (400 MHz, CDCl<sub>3</sub>)  $\delta$  6.91 (s, 2H), 6.86 (s, 1H), 6.27-6.20 (m, 1H), 5.83-5.62 (m, 1H), 4.75-4.68 (m, 2H), 4.24-4.16 (m, 2H), 2.29 (s, 6H), 1.30 (t, *J* = 7.1 Hz, 3H). <sup>13</sup>C NMR (100 MHz, CDCl<sub>3</sub>)  $\delta$  206.7, 155.0, 138.2, 132.9, 129.2, 124.9, 96.7, 90.5, 65.3, 64.2, 21.2, 14.3. HRMS Calculated for C<sub>15</sub>H<sub>19</sub>O<sub>3</sub> [M+H]<sup>+</sup> 247.1329, found: 247.1328.

---

**4-([1,1'-Biphenyl]-4-yl)buta-2,3-dien-1-yl ethyl carbonate (2j):**

2.123 g, 36% yield (two steps), yellow liquid, new compound, R<sub>f</sub> = 0.32 (hexanes/ethyl acetate 20/1). <sup>1</sup>H NMR (400 MHz, CDCl<sub>3</sub>)  $\delta$  7.60-7.53 (m, 4H), 7.45-7.41 (m, 2H), 7.38-7.31 (m, 3H), 6.38-6.33 (m, 1H), 5.86-5.69 (m, 1H), 4.79-4.69 (m, 2H),

4.24-4.17 (m, 2H), 1.30 (t,  $J = 7.1$  Hz, 3H).  $^{13}\text{C}$  NMR (100 MHz,  $\text{CDCl}_3$ )  $\delta$  206.9, 155.0, 140.7, 140.3, 132.2, 128.8, 127.5, 127.4, 127.4, 127.0, 96.4, 90.9, 65.1, 64.2, 14.3. HRMS Calculated for  $\text{C}_{19}\text{H}_{19}\text{O}_3$   $[\text{M}+\text{H}]^+$  295.1329, found: 295.1327.

**Ethyl (4-(naphthalen-2-yl)buta-2,3-dien-1-yl) carbonate (2k):**

1.834 g, 34% yield (two steps), pale yellow liquid, new compound,  $R_f = 0.57$  (hexanes/ethyl acetate 20/1).  $^1\text{H}$  NMR (400 MHz,  $\text{CDCl}_3$ )  $\delta$  7.82-7.73 (m, 3H), 7.65 (s, 1H), 7.48-7.38 (m, 3H), 6.57-6.42 (m, 1H), 5.94-5.67 (m, 1H), 4.81-4.71 (m, 2H), 4.25-4.14 (m, 2H), 1.28 (t,  $J = 7.1$  Hz, 3H).  $^{13}\text{C}$  NMR (100 MHz,  $\text{CDCl}_3$ )  $\delta$  207.2, 155.0, 133.6, 132.9, 130.7, 128.4, 127.8, 127.8, 126.4, 126.1, 125.9, 124.7, 97.1, 91.1, 65.2, 64.2, 14.3. HRMS Calculated for  $\text{C}_{17}\text{H}_{20}\text{NO}_3$   $[\text{M}+\text{NH}_4]^+$  286.1438, found: 286.1437.

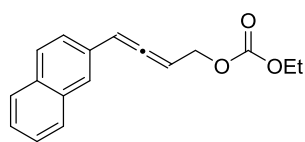

**Ethyl (4-(thiophen-3-yl)buta-2,3-dien-1-yl) carbonate (2l):**

1.726 g, 38% yield (two steps), yellow liquid, new compound,  $R_f = 0.62$  (hexanes/ethyl acetate 20/1).  $^1\text{H}$  NMR (400 MHz,  $\text{CDCl}_3$ )  $\delta$  7.27-7.25 (m, 1H), 7.11 (d,  $J = 2.8$  Hz, 1H), 7.09-7.02 (m, 1H), 6.45-6.33 (m, 1H), 5.77-5.59 (m, 1H), 4.74-4.65 (m, 2H), 4.19 (q,  $J = 7.1$  Hz, 2H), 1.29 (t,  $J = 7.1$  Hz, 3H).  $^{13}\text{C}$  NMR (100 MHz,  $\text{CDCl}_3$ )  $\delta$  207.0, 154.9, 134.3, 126.4, 126.1, 121.7, 91.3, 90.0, 65.1, 64.2, 14.3. HRMS Calculated for  $\text{C}_{11}\text{H}_{12}\text{NaO}_3\text{S}$   $[\text{M}+\text{Na}]^+$  247.0399, found: 247.0401.

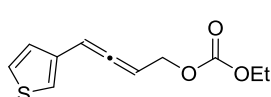

**Ethyl penta-2,3-dien-1-yl carbonate (2m):**

0.408 g, 13% yield (two steps), colorless liquid, new compound,  $R_f = 0.58$  (hexanes/ethyl acetate 20/1).  $^1\text{H}$  NMR (400 MHz,  $\text{CDCl}_3$ )  $\delta$  5.41-5.10 (m, 2H), 4.63-4.56 (m, 2H), 4.20 (q,  $J = 7.1$  Hz, 2H), 1.68 (dd,  $J = 5.7, 4.5$  Hz, 3H), 1.31 (t,  $J = 7.1$  Hz, 3H).  $^{13}\text{C}$  NMR (100 MHz,  $\text{CDCl}_3$ )  $\delta$  206.5, 155.0, 87.7, 85.9, 66.0, 64.0, 14.3, 13.8. HRMS Calculated for  $\text{C}_8\text{H}_{13}\text{O}_3$   $[\text{M}+\text{H}]^+$  157.0859, found: 157.0859.

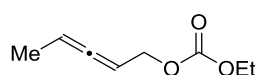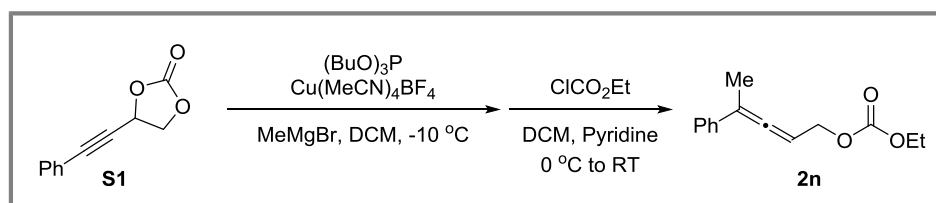

To a dried Schlenk flask were sequentially added catalyst  $\text{Cu}(\text{MeCN})_4\text{BF}_4$  (0.189 g, 0.6 mmol),  $(n\text{-BuO})_3\text{P}$  (0.32 mL, 1.2 mmol) and dichloromethane (10 mL) under the nitrogen atmosphere. The mixture was stirred at room temperature for 1 h. After cooling to  $-10$  °C, the methylmagnesium bromide (12 mL, 1.0 M in tetrahydrofuran, 12 mmol) was added and the reaction was stirred for 30 min at  $-10$  °C. Then, a solution of the dioxolanone **S1** (1.129 g, 6 mmol) in dichloromethane (5.0 mL) was added and the reaction mixture was stirred at  $-10$  °C for 22 h. Afterwards, the reaction mixture was quenched with ammonium chloride saturated solution. After separation, the aqueous layer was extracted with diethyl ether (20 mL $\times$ 3). The combined organic layer was dried over anhydrous sodium sulfate, filtered and concentrated under the reduced pressure. The residue was purified by flash chromatography on silica gel using hexanes/ethyl

acetate (20/1-10/1) as eluent to afford the intermediate  $\alpha$ -hydroxyallene.

A solution of the above  $\alpha$ -hydroxyallene (0.343 g, 2.1 mmol) and pyridine (0.51 mL, 6.3 mmol) in dichloromethane (10 mL) was cooled to 0 °C. The ethyl chloroformate (0.40 mL, 4.2 mmol) was added dropwise over a period of 5 minutes. The reaction mixture was allowed to warm to room temperature. When the reaction was completed as monitored by TLC, the reaction mixture was acidified with the hydrogen chloride aqueous solution (3.0 M) to pH 5-6 and extracted three times with dichloromethane. The combined organic layer was dried over anhydrous sodium sulfate, filtered and concentrated under the reduced pressure. The residue was purified by flash chromatography on silica gel using hexanes/ethyl acetate (50/1) as eluent to give the desirable allenylic carbonate **2n**.

---

**Ethyl (4-phenylpenta-2,3-dien-1-yl) carbonate (2n):**

0.451 g, 33% yield (two steps), pale yellow liquid, new compound,  $R_f = 0.67$  (hexanes/ethyl acetate 20/1).  $^1\text{H NMR}$  (400 MHz,  $\text{CDCl}_3$ )  $\delta$  7.42-7.37 (m, 2H), 7.35-7.29 (m, 2H), 7.25-7.19 (m, 1H), 5.73-5.57 (m, 1H), 4.70 (d,  $J = 6.8$  Hz, 2H), 4.20 (q,  $J = 7.1$  Hz, 2H), 2.12 (d,  $J = 2.8$  Hz, 3H), 1.30 (t,  $J = 7.1$  Hz, 3H).  $^{13}\text{C NMR}$  (100 MHz,  $\text{CDCl}_3$ )  $\delta$  205.8, 155.0, 136.0, 128.4, 127.1, 125.9, 102.9, 88.7, 65.7, 64.1, 16.8, 14.3. HRMS Calculated for  $\text{C}_{14}\text{H}_{20}\text{NO}_3$   $[\text{M}+\text{NH}_4]^+$  250.1438, found: 250.1443.

---

### 3. Palladium-Catalyzed Asymmetric Allenylic Alkylation

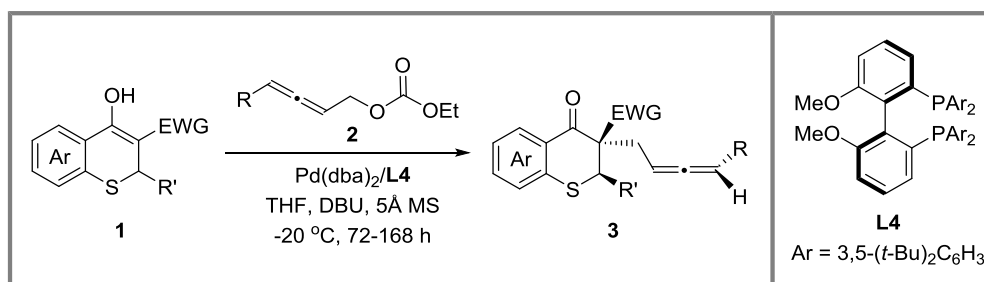

The metal precursor Pd(dba)<sub>2</sub> (0.02 mmol, 11.5 mg, 10 mol%), ligand (*R*)-DTB-BIPHEP (**L4**) (0.022 mmol, 22.7 mg, 11 mol%) and tetrahydrofuran (1.5 mL) were placed in a dried Schlenk tube under nitrogen atmosphere. The mixture was stirred at 30 °C for 30 min. Then the mixture was cooled to -20 °C. Thereafter, the thiochromanone derivatives **1** (0.2 mmol), 5Å MS (50.0 mg) and 1,8-diazabicyclo[5,4,0]undec-7-ene (DBU) (35.9 μL, 0.24 mmol) were added and the reaction was stirred at -20 °C for 10 minutes. Sequentially, the allenylic carbonates **2** (0.3 mmol) and tetrahydrofuran (0.5 mL) were added slowly. The mixture was stirred at -20 °C for 72-168 h. After the completion of the reaction, the volatiles were directly removed under the reduced pressure. The residue was quickly purified by column chromatography on silica gel (hexanes/ethyl acetate/dichloromethane 100/1/2-100/3/6) to give the desirable allenylic alkylation products **3**.

The racemates were prepared by running reactions with an achiral 1,3-bis(diphenylphosphino)propane ligand at 30 °C. It was worth noting that the products **3** were sensitive to water or alcohol, which would lead to partial decrease of dr value.

#### (-)-Methyl 4-oxo-2-phenyl-3-(4-phenylbuta-2,3-dien-1-yl)thiochromane-3-carboxylate (**3ca**):

The reaction was conducted at -20 °C for 72 h. 78.5 mg, 92% yield, pale yellow viscous liquid, new compound, R<sub>f</sub> = 0.28 (hexanes/ethyl acetate 20/1), 32.3:1 dr, 99% ee (major diastereoisomer), [α]<sub>D</sub><sup>20</sup> = -209.67 (*c* 0.63, CHCl<sub>3</sub>). The major diastereoisomer: <sup>1</sup>H NMR (400 MHz, CDCl<sub>3</sub>) δ 8.17 (d, *J* = 7.9 Hz, 1H), 7.43-7.31 (m, 6H), 7.27-7.22 (m, 4H), 7.20-7.10 (m, 3H), 6.22-5.96 (m, 1H), 5.66-5.43 (m, 1H), 4.98 (s, 1H), 3.65 (s, 3H), 3.22-3.02 (m, 1H), 2.73-2.51 (m, 1H). <sup>13</sup>C NMR (100 MHz, CDCl<sub>3</sub>) δ 207.4, 192.4, 169.7, 141.5, 135.6, 133.9, 133.2, 130.8, 130.5, 129.2, 128.9, 128.6, 128.5, 127.3, 127.1, 126.8, 125.5, 95.5, 89.9, 62.7, 52.4, 51.1, 32.5. HPLC: Chiralpak IC column, 254 nm, 30 °C, *n*-Hexane/*i*-PrOH = 95/5, flow = 1.0 mL/min, retention time 15.0 min (minor) and 16.0 min (major). HRMS Calculated for the C<sub>27</sub>H<sub>23</sub>O<sub>3</sub>S [M+H]<sup>+</sup> 427.1362, found: 427.1372.

The mixture with low 2.3:1 dr: <sup>1</sup>H NMR (400 MHz, CDCl<sub>3</sub>) δ 8.17 (d, *J* = 7.9 Hz, 1H, major), 7.88 (d, *J* = 7.9 Hz, 1H, minor), 7.40-7.12 (m, 26H, major + minor), 6.16-6.01 (m, 2H, major + minor), 5.62-5.45 (m, 2H, major + minor), 5.09 (s, 1H, minor), 4.98 (s, 1H, major), 3.65 (s, 6H, major + minor), 3.18-3.04 (m, 2H, major + minor), 2.67-2.53 (m, 2H, major + minor). <sup>13</sup>C NMR (100 MHz, CDCl<sub>3</sub>) δ 207.4, 207.2, 192.4, 192.2, 169.7, 169.7, 141.5, 141.0, 135.7, 135.6, 133.9, 133.8, 133.2, 133.0, 130.8, 130.8, 130.5, 130.4, 129.2, 129.0, 128.9, 128.8, 128.6, 128.5, 128.5, 128.4, 127.3, 127.2, 127.1, 127.0, 126.9, 126.8, 125.5, 125.4, 95.9, 95.5, 90.0,

89.9, 62.9, 62.7, 52.4, 52.3, 51.1, 50.9, 32.5, 32.3.

**(-)-Methyl 4-oxo-3-(4-phenylbuta-2,3-dien-1-yl)-2-(*o*-tolyl)thiochromane-3-carboxylate (3ea):**

The reaction was conducted at -20 °C for 120 h. 71.9 mg, 82% yield, pale yellow viscous liquid, new compound,  $R_f = 0.36$  (hexanes/ethyl acetate 20/1), 24.0:1 dr, 98% ee (major diastereoisomer),

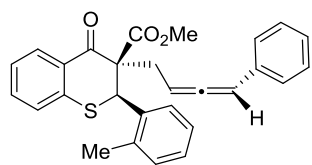

$[\alpha]_D^{20} = -25.30$  ( $c$  0.83,  $\text{CHCl}_3$ ). The major diastereoisomer:  $^1\text{H}$  NMR (400 MHz,  $\text{CDCl}_3$ )  $\delta$  8.20 (dd,  $J = 8.0, 1.3$  Hz, 1H), 7.52 (d,  $J = 7.7$  Hz, 1H), 7.42-7.34 (m, 1H), 7.29-7.09 (m, 10H), 6.00-5.85 (m, 1H), 5.65-5.43 (m, 1H), 5.04 (s, 1H), 3.62 (s, 3H), 3.15-3.00 (m, 1H), 2.84-2.69 (m, 1H), 2.41 (s, 3H).  $^{13}\text{C}$  NMR (100 MHz,  $\text{CDCl}_3$ )  $\delta$  207.0, 192.1, 170.1, 141.3, 136.4, 134.9, 134.1, 133.2, 130.9, 130.8, 130.5, 128.5, 128.5, 128.1, 127.1, 127.0, 126.9, 126.4, 125.4, 94.9, 89.9, 62.0, 52.5, 47.0, 32.8, 20.3. HPLC: Chiralpak ID column, 254 nm, 30 °C,  $n$ -Hexane/ $i$ -PrOH = 97/3, flow = 1.0 mL/min, retention time 13.9 min (major) and 16.6 min. HRMS Calculated for  $\text{C}_{28}\text{H}_{24}\text{NaO}_3\text{S}$   $[\text{M}+\text{Na}]^+$  463.1338, found: 463.1341.

**(-)-Methyl 4-oxo-3-(4-phenylbuta-2,3-dien-1-yl)-2-(*m*-tolyl)thiochromane-3-carboxylate(3fa):**

The reaction was conducted at -20 °C for 120 h. 78.1 mg, 89% yield, pale yellow viscous liquid, new compound,  $R_f = 0.36$  (hexanes/ethyl acetate 20/1), 32.3:1 dr, 99% ee (major diastereoisomer),

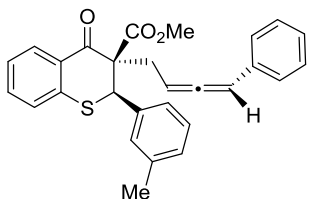

$[\alpha]_D^{20} = -241.32$  ( $c$  0.90,  $\text{CHCl}_3$ ). The major diastereoisomer:  $^1\text{H}$  NMR (400 MHz,  $\text{CDCl}_3$ )  $\delta$  8.24-8.10 (m, 1H), 7.42-7.37 (m, 1H), 7.27-7.13 (m, 10H), 6.19-6.00 (m, 1H), 5.60-5.41 (m, 1H), 4.97 (s, 1H), 3.65 (s, 3H), 3.22-3.03 (m, 1H), 2.69-2.52 (m, 1H), 2.33 (s, 3H).  $^{13}\text{C}$  NMR (100 MHz,  $\text{CDCl}_3$ )  $\delta$  207.5, 192.5, 169.7, 141.7, 138.1, 135.3, 134.0, 133.2, 130.8, 130.5, 130.1, 129.7, 128.6, 128.4, 127.3, 127.1, 126.8, 126.1, 125.5, 95.5, 90.0, 62.7, 52.3, 51.1, 32.4, 21.5. HPLC: Chiralcel OD-3 column, 254 nm, 30 °C,  $n$ -Hexane/ $i$ -PrOH = 95/5, flow = 0.8 mL/min, retention time 10.2 min and 23.6 min (major). HRMS Calculated for  $\text{C}_{28}\text{H}_{24}\text{NaO}_3\text{S}$   $[\text{M}+\text{Na}]^+$  463.1338, found: 463.1342.

**(-)-Methyl 4-oxo-3-(4-phenylbuta-2,3-dien-1-yl)-2-(*p*-tolyl)thiochromane-3-carboxylate(3ga):**

The reaction was conducted at -20 °C for 120 h. 79.3 mg, 90% yield, pale yellow viscous liquid, new compound,  $R_f = 0.36$  (hexanes/ethyl acetate 20/1), 32.3:1 dr, 99% ee (major diastereoisomer),

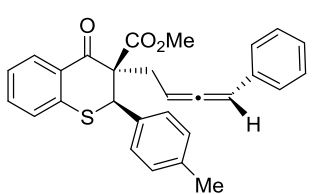

$[\alpha]_D^{20} = -226.76$  ( $c$  0.93,  $\text{CHCl}_3$ ). The major diastereoisomer:  $^1\text{H}$  NMR (400 MHz,  $\text{CDCl}_3$ )  $\delta$  8.31-8.04 (m, 1H), 7.43-7.37 (m, 1H), 7.27-7.22 (m, 6H), 7.20-7.11 (m, 5H), 6.21-6.00 (m, 1H), 5.61-5.41 (m, 1H), 4.96 (s, 1H), 3.65 (s, 3H), 3.16-3.03 (m, 1H), 2.64-2.55 (m, 1H), 2.34 (s, 3H).  $^{13}\text{C}$  NMR (100 MHz,  $\text{CDCl}_3$ )  $\delta$  207.4, 192.6, 169.8, 141.7, 138.8, 134.0, 133.2, 132.4, 130.9, 130.5, 129.2, 129.0, 128.6, 127.3, 127.0, 126.9, 125.5, 95.5, 89.9, 62.8, 52.4, 50.9, 32.4, 21.2. HPLC: Chiralpak IA, 254 nm, 30 °C,  $n$ -Hexane/ $i$ -PrOH = 95/5, flow = 1.0 mL/min, retention time 13.6 min and 17.4 min (major). HRMS Calculated for  $\text{C}_{28}\text{H}_{24}\text{NaO}_3\text{S}$   $[\text{M}+\text{Na}]^+$  463.1338, found: 463.1340.

**(-)-Methyl 2-(4-fluorophenyl)-4-oxo-3-(4-phenylbuta-2,3-dien-1-yl)thiochromane-3-carboxylate (3ha):** The reaction was conducted at -20 °C for 120 hours. 83.4 mg, 94% yield, pale yellow

viscous liquid, new compound,  $R_f = 0.40$  (hexanes/ethyl acetate 20/1), 49.0:1 dr, 99% ee (major diastereoisomer),  $[\alpha]_D^{20} = -215.33$  ( $c$  0.73,  $\text{CHCl}_3$ ). The major diastereoisomer:

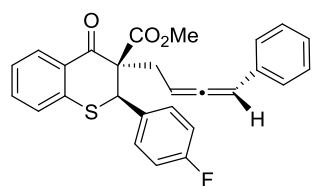

$^1\text{H NMR}$  (400 MHz,  $\text{CDCl}_3$ )  $\delta$  8.17 (dd,  $J = 8.0, 1.2$  Hz, 1H), 7.44-7.34 (m, 3H), 7.27-7.22 (m, 4H), 7.20-7.12 (m, 3H), 7.07-6.96 (m, 2H), 6.18-5.97 (m, 1H), 5.63-5.41 (m, 1H), 4.95 (s, 1H), 3.65 (s, 3H), 3.17-3.04 (m, 1H), 2.63-2.50 (m, 1H).  $^{13}\text{C NMR}$  (100 MHz,  $\text{CDCl}_3$ )  $\delta$  207.4, 192.1, 169.7, 162.8 (d,  $^1J_{\text{F-C}} = 248.6$  Hz), 141.2, 133.8, 133.3, 131.4 (d,  $^4J_{\text{F-C}} = 3.4$  Hz), 131.0, 131.0, 130.8, 130.5, 128.6, 127.2 (d,  $^3J_{\text{F-C}} = 8.9$  Hz), 126.8, 125.7, 115.5 (d,  $^2J_{\text{F-C}} = 21.6$  Hz), 95.6, 89.8, 62.6, 52.4, 50.3, 32.4.  $^{19}\text{F NMR}$  (376 MHz,  $\text{CDCl}_3$ )  $\delta$  -112.38. HPLC: Chiralcel OD-H column, 254 nm, 30 °C,  $n$ -Hexane/ $i$ -PrOH = 95/5, flow = 1.0 mL/min, retention time 9.6 min and 15.7 min (major). HRMS Calculated for  $\text{C}_{27}\text{H}_{21}\text{FNaO}_3\text{S}$   $[\text{M}+\text{Na}]^+$  467.1088, found: 467.1087.

**(-)-Methyl 2-(4-chlorophenyl)-4-oxo-3-(4-phenylbuta-2,3-dien-1-yl)thiochromane-3-carboxylate (3ia):** The reaction was conducted at -20 °C for 120 hours. 88.3 mg, 96% yield, pale yellow viscous liquid, new compound,  $R_f = 0.40$  (hexanes/ethyl acetate 20/1), 49.0:1 dr, 99% ee (major diastereoisomer),  $[\alpha]_D^{20} = -200.57$  ( $c$  1.03,  $\text{CHCl}_3$ ). The major diastereoisomer:

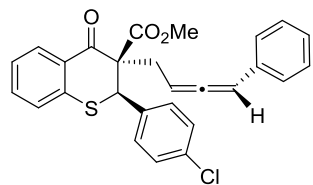

$^1\text{H NMR}$  (400 MHz,  $\text{CDCl}_3$ )  $\delta$  8.17 (d,  $J = 7.9$  Hz, 1H), 7.44-7.38 (m, 1H), 7.35-7.28 (m, 4H), 7.27-7.21 (m, 4H), 7.19-7.13 (m, 3H), 6.19-5.99 (m, 1H), 5.60-5.40 (m, 1H), 4.93 (s, 1H), 3.64 (s, 3H), 3.17-3.04 (m, 1H), 2.64-2.53 (m, 1H).  $^{13}\text{C NMR}$  (100 MHz,  $\text{CDCl}_3$ )  $\delta$  207.4, 192.0, 169.6, 141.0, 134.8, 134.1, 133.8, 133.4, 130.8, 130.6, 130.5, 128.7, 128.6, 127.3, 127.2, 126.9, 125.7, 95.6, 89.8, 62.5, 52.5, 50.5, 32.5. HPLC: Chiralcel OD-H column, 254 nm, 30 °C,  $n$ -Hexane/ $i$ -PrOH = 95/5, flow = 1.0 mL/min, retention time 10.2 min and 16.5 min (major). HRMS Calculated for  $\text{C}_{27}\text{H}_{21}\text{ClNaO}_3\text{S}$   $[\text{M}+\text{Na}]^+$  483.0792 ( $^{35}\text{Cl}$ ) and 485.0773 ( $^{37}\text{Cl}$ ), found: 483.0793 ( $^{35}\text{Cl}$ ) and 485.0792 ( $^{37}\text{Cl}$ ).

**(-)-Methyl 2-(4-bromophenyl)-4-oxo-3-(4-phenylbuta-2,3-dien-1-yl)thiochromane-3-carboxylate (3ja):** The reaction was conducted at -20 °C for 120 hours. 94.5 mg, 93% yield, pale yellow viscous liquid, new compound,  $R_f = 0.40$  (hexanes/ethyl acetate 20/1), 49.0:1 dr, 99% ee (major diastereoisomer),  $[\alpha]_D^{20} = -186.71$  ( $c$  1.10,  $\text{CHCl}_3$ ). The major diastereoisomer:

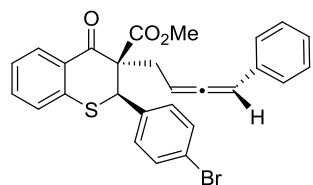

$^1\text{H NMR}$  (400 MHz,  $\text{CDCl}_3$ )  $\delta$  8.17 (dd,  $J = 8.0, 1.2$  Hz, 1H), 7.51-7.35 (m, 3H), 7.28-7.21 (m, 6H), 7.19-7.13 (m, 3H), 6.14-6.00 (m, 1H), 5.57-5.44 (m, 1H), 4.91 (s, 1H), 3.64 (s, 3H), 3.17-3.04 (m, 1H), 2.62-2.52 (m, 1H).  $^{13}\text{C NMR}$  (100 MHz,  $\text{CDCl}_3$ )  $\delta$  207.4, 192.0, 169.6, 141.0, 134.6, 133.8, 133.4, 131.7, 130.9, 130.7, 130.5, 128.6, 127.3, 127.2, 126.9, 125.7, 123.0, 95.6, 89.8, 62.5, 52.5, 50.5, 32.5. HPLC: Chiralcel OD-H column, 254 nm, 30 °C,  $n$ -Hexane/ $i$ -PrOH = 95/5, flow = 1.0 mL/min, retention time 11.1 min (minor) and 17.2 min (major). HRMS Calculated for  $\text{C}_{27}\text{H}_{21}\text{BrNaO}_3\text{S}$   $[\text{M}+\text{Na}]^+$  527.0287 ( $^{79}\text{Br}$ ) and 529.0270 ( $^{81}\text{Br}$ ), found: 527.0292 ( $^{79}\text{Br}$ ) and 529.0275 ( $^{81}\text{Br}$ ).

**(-)-Methyl 2-(4-methoxyphenyl)-4-oxo-3-(4-phenylbuta-2,3-dien-1-yl)thiochromane-3-carboxylate (3ka):** The reaction was conducted at -20 °C for 72 h. 76.9 mg, 84% yield, pale yellow viscous liquid, new compound,  $R_f = 0.23$  (hexanes/ethyl acetate 20/1), 32.3:1 dr, 99% ee (major diastereoisomer),  $[\alpha]_D^{20} = -186.71$  ( $c$  1.10,  $\text{CHCl}_3$ ). The major diastereoisomer:

diastereoisomer),  $[\alpha]_D^{20} = -208.12$  ( $c$  1.07,  $\text{CHCl}_3$ ). The major diastereoisomer:  $^1\text{H}$  NMR (400 MHz,  $\text{CDCl}_3$ )  $\delta$  8.21-8.09 (m, 1H), 7.43-7.34 (m, 1H), 7.33-7.27 (m, 2H), 7.26-7.20 (m, 4H),

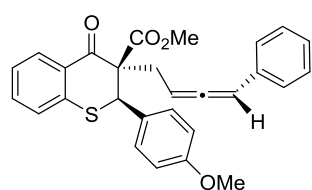

7.19-7.13 (m, 3H), 6.89-6.81 (m, 2H), 6.15-6.00 (m, 1H), 5.59-5.43 (m, 1H), 4.93 (s, 1H), 3.79 (s, 3H), 3.65 (s, 3H), 3.15-3.01 (m, 1H), 2.65-2.52 (m, 1H).  $^{13}\text{C}$  NMR (100 MHz,  $\text{CDCl}_3$ )  $\delta$  207.4, 192.6, 169.8, 159.8, 141.8, 134.0, 133.2, 130.8, 130.5, 130.4, 128.6, 127.4, 127.2, 127.0, 126.9, 125.5, 113.8, 95.4, 89.9, 62.8, 55.3, 52.4, 50.5,

32.4. HPLC: Chiralcel OD-H column, 254 nm, 30 °C,  $n$ -Hexane/ $i$ -PrOH = 94/6, flow = 1.0 mL/min, retention time 13.3 min (minor) and 26.0 min (major). HRMS Calculated for  $\text{C}_{28}\text{H}_{24}\text{NaO}_4\text{S}$   $[\text{M}+\text{Na}]^+$  479.1288, found: 479.1291.

**(-)-Methyl 2-methyl-4-oxo-3-(4-phenylbuta-2,3-dien-1-yl)thiochromane-3-carboxylate (3la):**

The reaction was conducted at -20 °C for 72 h. 68.2 mg, 94% yield, pale yellow viscous liquid, new compound,  $R_f = 0.45$  (hexanes/ethyl acetate 20/1), 9.0:1 dr, 99% ee (major diastereoisomer),

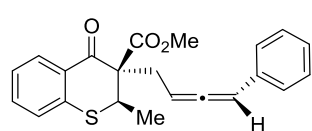

$[\alpha]_D^{20} = -87.47$  ( $c$  0.95,  $\text{CHCl}_3$ ). The major diastereoisomer:  $^1\text{H}$  NMR (400 MHz,  $\text{CDCl}_3$ )  $\delta$  8.16 (d,  $J = 7.6$  Hz, 1H), 7.41-7.34 (m, 1H), 7.30-7.14 (m, 7H), 6.29-5.97 (m, 1H), 5.65-5.35 (m, 1H), 3.84 (q,  $J = 6.9$  Hz, 1H), 3.63 (s, 3H), 3.39-3.24 (m, 1H), 2.92-2.77 (m, 1H), 1.61 (d,  $J = 7.0$  Hz, 3H).  $^{13}\text{C}$  NMR (100 MHz,  $\text{CDCl}_3$ )  $\delta$  207.1, 191.7, 170.2, 141.3, 134.0,

133.0, 130.7, 130.4, 128.6, 127.2, 127.1, 126.9, 125.3, 95.0, 89.3, 61.7, 52.4, 41.8, 31.1, 15.6. HPLC: Chiralpak IC column, 254 nm, 30 °C,  $n$ -Hexane/ $i$ -PrOH = 99/1, flow = 1.0 mL/min, retention time 19.7 min (major) and 22.0 min. HRMS Calculated for  $\text{C}_{22}\text{H}_{21}\text{O}_3\text{S}$   $[\text{M}+\text{H}]^+$  365.1206, found: 365.1209.

**(-)-Methyl 6-nitro-4-oxo-2-phenyl-3-(4-phenylbuta-2,3-dien-1-yl)thiochromane-3-carboxylate (3ma):** The reaction was conducted at -20 °C for 120 h. 86.1 mg, 91% yield, pale yellow viscous liquid, new compound,  $R_f = 0.18$  (hexanes/ethyl acetate 20/1), 49.0:1 dr, 99% ee (major diastereoisomer),  $[\alpha]_D^{20} = -207.17$  ( $c$  1.10,  $\text{CHCl}_3$ ). The major diastereoisomer:  $^1\text{H}$  NMR (400 MHz,  $\text{CDCl}_3$ )  $\delta$  8.94 (d,  $J = 2.5$  Hz, 1H), 8.16 (dd,  $J = 8.7, 2.6$  Hz, 1H), 7.40-7.32 (m, 6H), 7.24-7.19 (m, 2H), 7.18-7.08 (m, 3H), 6.15-5.99 (m, 1H), 5.62-

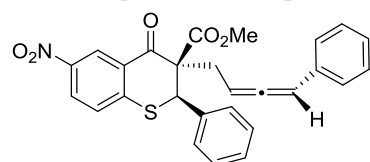

5.48 (m, 1H), 5.07 (s, 1H), 3.66 (s, 3H), 3.22-3.07 (m, 1H), 2.63-2.52 (m, 1H).  $^{13}\text{C}$  NMR (100 MHz,  $\text{CDCl}_3$ )  $\delta$  207.5, 190.5, 168.9, 149.7, 145.6, 134.2, 133.6, 130.9, 129.4, 129.2, 128.8, 128.6, 128.1, 127.2, 126.7, 126.7, 125.7, 96.2, 89.3, 62.1, 52.6, 51.0, 32.0. HPLC: Chiralpak IB column, 254 nm, 30 °C,  $n$ -Hexane/ $i$ -PrOH = 85/15, flow = 1.0 mL/min, retention time 11.4 min and 18.6 min (major). HRMS Calculated for  $\text{C}_{27}\text{H}_{22}\text{NO}_5\text{S}$   $[\text{M}+\text{H}]^+$  472.1213, found: 472.1218.

**(-)-Methyl 6-methoxy-4-oxo-2-phenyl-3-(4-phenylbuta-2,3-dien-1-yl)thiochromane-3-carboxylate (3na):** The reaction was conducted at -20 °C for 120 h. 78.8 mg, 86% yield, yellow viscous liquid, new compound,  $R_f = 0.21$  (hexanes/ethyl acetate 20/1), 32.3:1 dr, 99% ee (major diastereoisomer),  $[\alpha]_D^{20} = -234.07$  ( $c$  0.93,  $\text{CHCl}_3$ ). The major diastereoisomer:  $^1\text{H}$  NMR (400 MHz,  $\text{CDCl}_3$ )  $\delta$  7.65 (d,  $J = 2.9$  Hz, 1H), 7.39-7.29 (m, 5H), 7.25-7.21 (m, 2H), 7.19-7.09 (m, 4H), 7.05-6.98 (m, 1H), 6.15-6.04 (m, 1H), 5.59-5.43 (m, 1H), 4.96 (s, 1H), 3.84 (s, 3H), 3.65 (s, 3H), 3.19-3.06 (m, 1H), 2.66-2.54 (m, 1H).  $^{13}\text{C}$  NMR (100 MHz,  $\text{CDCl}_3$ )  $\delta$  207.4, 192.5, 169.8,

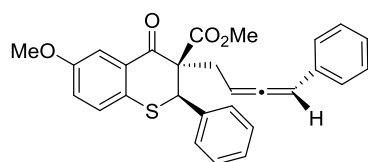

157.8, 135.7, 133.9, 133.0, 131.6, 129.1, 128.8, 128.6, 128.6, 128.5, 127.1, 126.9, 122.3, 112.6, 95.5, 89.9, 62.8, 55.6, 52.4, 51.5, 32.5. HPLC: Chiral- pak AD-3, 254 nm, 30 °C, *n*-Hexane/*i*-PrOH = 90/10, flow = 0.8 mL/min, retention time 18.2 min and 19.4 min (major). HRMS Calculated for C<sub>28</sub>H<sub>25</sub>O<sub>4</sub>S [M+ H]<sup>+</sup> 457.1468, found: 457.1466.

**(-)-Methyl 6-methyl-4-oxo-2-phenyl-3-(4-phenylbuta-2,3-dien-1-yl)thiochromane-3-carboxylate (30a):** The reaction was conducted at -20 °C for 120 hours. 82.9 mg, 94% yield, pale yellow viscous liquid, new compound, R<sub>f</sub> = 0.31 (hexanes/ethyl acetate 20/1), 32.3:1 dr, 99% ee (major diastereoisomer), [α]<sub>D</sub><sup>20</sup> = -225.21 (*c* 0.88, CHCl<sub>3</sub>). The major diastereoisomer: <sup>1</sup>H NMR (400 MHz, CDCl<sub>3</sub>) δ 8.00-7.94 (m, 1H), 7.39-7.30 (m, 5H), 7.26-7.21 (m, 3H), 7.20-7.11 (m, 4H), 6.15-6.02 (m, 1H), 5.59-5.45 (m, 1H), 4.96 (s, 1H), 3.64 (s, 3H), 3.17-3.06 (m, 1H), 2.64-2.55 (m, 1H), 2.36 (s, 3H). <sup>13</sup>C NMR (100 MHz, CDCl<sub>3</sub>) δ 207.4, 192.7, 169.8, 138.2, 135.7, 135.5, 134.4, 134.0, 130.6, 129.1, 128.8, 128.5, 128.5, 127.2, 127.0, 126.9, 95.4 89.9, 62.8, 52.3, 51.3, 32.5, 21.0. HPLC: Chiralpak AD-H column, 254 nm, 30 °C, *n*-Hexane/*i*-PrOH = 96/4, flow = 1.0 mL/min, retention time 22.0 min and 25.0 min (major). HRMS Calculated for C<sub>28</sub>H<sub>25</sub>O<sub>3</sub>S [M+H]<sup>+</sup> 441.1519, found: 441.1516.

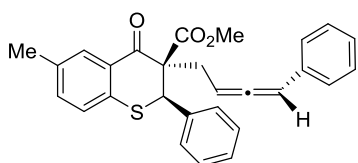

**(-)-*t*-Butyl 4-oxo-2-phenyl-3-(4-phenylbuta-2,3-dien-1-yl)thiochromane-3-carboxylate (3pa):** The reaction was conducted at -20 °C for 120 h. 88.7 mg, 95% yield, pale yellow viscous liquid, new compound, R<sub>f</sub> = 0.40 (hexanes/ethyl acetate 20/1), 32.3:1 dr, 99% ee (major diastereoisomer), [α]<sub>D</sub><sup>20</sup> = -182.51 (*c* 1.03, CHCl<sub>3</sub>). The major diastereoisomer: <sup>1</sup>H NMR (400 MHz, CDCl<sub>3</sub>) δ 8.18 (dd, *J* = 8.2, 1.5 Hz, 1H), 7.50-7.43 (m, 2H), 7.40-7.31 (m, 4H), 7.26-7.13 (m, 7H), 6.17-6.01 (m, 1H), 5.56-5.41 (m, 1H), 4.92 (s, 1H), 3.19-3.03 (m, 1H), 2.62-2.41 (m, 1H), 1.32 (s, 9H). <sup>13</sup>C NMR (100 MHz, CDCl<sub>3</sub>) δ 207.4, 192.4, 168.1, 141.7, 135.5, 134.2, 132.8, 131.2, 130.3, 129.6, 128.8, 128.5, 128.4, 126.9, 126.9, 126.8, 125.2, 95.2, 90.1, 83.2, 62.2, 51.3, 32.0, 27.7. HPLC: Chiralpak AD-3 column, 254 nm, 30 °C, *n*-Hexane/*i*-PrOH = 96/4, flow = 0.8 mL/min, the retention time 11.2 min and 13.5 min (major). HRMS Calculated for C<sub>30</sub>H<sub>28</sub>NaO<sub>3</sub>S [M+Na]<sup>+</sup> 491.1651, found: 491.1656.

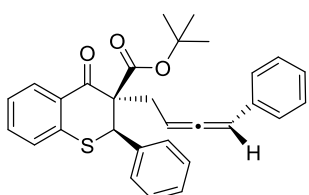

**(+)-Methyl 2-(benzofuran-2-yl)-4-oxo-3-(4-phenylbuta-2,3-dien-1-yl)thiochromane-3-carboxylate (3qa):** The reaction was conducted at -20 °C for 72 h. 79.1 mg, 85% yield, pale yellow viscous liquid, new compound, R<sub>f</sub> = 0.32 (hexanes/ethyl acetate 20/1), 5.7:1 dr, 97% ee (major diastereoisomer), [α]<sub>D</sub><sup>20</sup> = +33.29 (*c* 0.82, CHCl<sub>3</sub>). The major diastereoisomer: <sup>1</sup>H NMR (400 MHz, CDCl<sub>3</sub>) δ 8.21 (dd, *J* = 8.0, 1.1 Hz, 1H), 7.53-7.47 (m, 1H), 7.43-7.37 (m, 2H), 7.28-7.16 (m, 9H), 6.75 (s, 1H), 6.14-6.01 (m, 1H), 5.65-5.52 (m, 1H), 5.14 (s, 1H), 3.65 (s, 3H), 3.28-3.16 (m, 1H), 2.97-2.85 (m, 1H). <sup>13</sup>C NMR (100 MHz, CDCl<sub>3</sub>) δ 207.7, 190.9, 169.5, 154.3, 152.6, 139.9, 133.8, 133.5, 130.5, 130.4, 128.6, 128.0, 127.3, 127.1, 126.9, 125.8, 124.7, 123.0, 121.3, 111.2, 106.1, 95.3, 89.2, 61.3, 52.7, 44.6, 32.9. HPLC: Chiralpak AD-H column, 254 nm, 30 °C, *n*-Hexane/*i*-PrOH = 93/7, flow = 1.0 mL/min, the

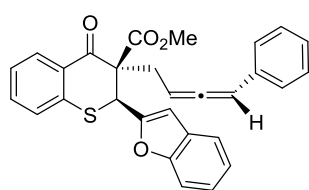



retention time 19.8 min and 22.3 min (major). HRMS Calculated for  $C_{29}H_{23}O_4S$   $[M+H]^+$  467.1312, found: 467.1320.

**(+)-3-Acetyl-2-phenyl-3-(4-phenylbuta-2,3-dien-1-yl)thiochroman-4-one (3ba):**

The reaction was conducted at 30 °C for 48 hours with commercially available (1*R*,1'*R*,2*S*,2'*S*)-DuanPhos as the chiral ligand. 49.8 mg, 61% yield, pale yellow viscous liquid, new compound,  $R_f$  = 0.35 (hexanes/ethyl acetate 20/1), 24.0:1 dr, 74% ee (major isomer),  $[\alpha]_D^{20}$  = +0.69 (*c* 0.58,  $CHCl_3$ ). The major diastereoisomer:  $^1H$  NMR (400 MHz,  $CDCl_3$ )  $\delta$  8.18 (dd, *J* = 8.0, 1.2 Hz, 1H), 7.46- 7.41 (m, 1H), 7.30-7.23 (m, 9H), 7.21-7.14 (m, 3H), 6.18-6.03 (m, 1H), 5.48-5.37 (m, 1H), 4.86 (s, 1H), 3.24-3.13 (m, 1H), 2.80-2.70 (m, 1H), 2.11 (s, 3H).  $^{13}C$  NMR (100 MHz,  $CDCl_3$ )  $\delta$  207.4, 205.2, 194.4, 140.8, 137.1, 133.9, 133.8, 130.9, 130.2, 128.8, 128.7, 128.6, 128.5, 127.4, 127.1, 126.8, 125.7, 95.5, 89.6, 67.1, 51.2, 33.7, 31.5. HPLC: Chiralcel OD-H column, 254 nm, 30 °C, *n*-Hexane/*i*-PrOH = 95/5, flow = 1.0 mL/min, retention time 9.4 min and 11.5 min (major). HRMS Calculated for  $C_{27}H_{23}O_2S$   $[M+H]^+$  411.1413, found: 411.1415. Notably, the absolute and relative configurations of this allenylic alkylation product were not further assigned.

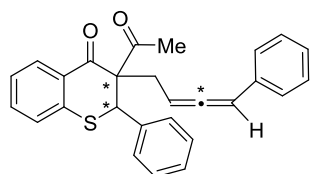

**2-Phenyl-3-(4-phenylbuta-2,3-dien-1-yl)-3-(piperidine-1-carbonyl)thiochroman-4-one (3da):**

The reaction was conducted at -20 °C for 168 h and the *rac*-**3da** was prepared with *rac*-BINAP at -20 °C. 32.3 mg, 34% yield, pale yellow viscous liquid, new compound,  $R_f$  = 0.52 (hexanes/ethyl acetate 5/1), 24.0:1 dr, >99% ee (major diastereoisomer),  $[\alpha]_D^{20}$  = -49.90 (*c* 1.08,  $CHCl_3$ ). The major diastereoisomer:  $^1H$  NMR (400 MHz,  $CDCl_3$ )  $\delta$  8.09 (dd, *J* = 7.9, 1.2 Hz, 1H), 7.51-7.43 (m, 1H), 7.37-7.33 (m, 1H), 7.33-7.28 (m, 3H), 7.27-7.21 (m, 7H), 7.19-7.14 (m, 1H), 6.22-6.02 (m, 1H), 5.71-5.55 (m, 1H), 4.87 (s, 1H), 4.04-3.14 (m, 2H), 3.14-2.13 (m, 4H), 1.50-1.37 (m, 4H), 1.37-1.10 (m, 2H).  $^{13}C$  NMR (100 MHz,  $CDCl_3$ )  $\delta$  207.7, 192.6, 167.3, 140.5, 137.9, 134.3, 133.7, 131.8, 130.1, 129.1, 128.6, 128.5, 128.3, 127.8, 126.9, 126.9, 126.1, 94.6, 91.0, 63.0, 52.1, 38.5, 24.9, 24.3. HPLC: Chiralpak IB column, 254 nm, 30 °C, *n*-Hexane/*i*-PrOH = 94/6, flow = 1.0 mL/min, retention time 13.1 min and 20.6 min (major). HRMS Calculated for  $C_{31}H_{30}NO_2S$   $[M+H]^+$  480.1992, found: 480.2000.

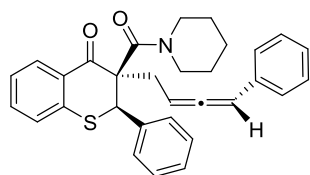

**(-)-Methyl (2*R*,3*S*)-3-((*R*)-4-(naphthalen-2-yl)buta-2,3-dien-1-yl)-6-nitro-4-oxo-2-phenylthiochromane-3-carboxylate (3mk):** The reaction was conducted at -20 °C for 168 h. 91.3 mg, 88% yield, pale yellow solid, mp 197-198 °C, new compound,  $R_f$  = 0.12 (hexanes/ethyl acetate 20/1),

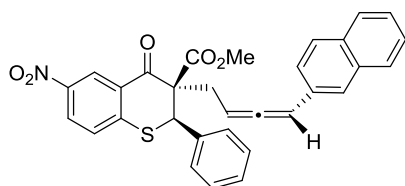

32.3:1 dr, >99% ee (major diastereoisomer),  $[\alpha]_D^{20}$  = -223.76 (*c* 1.14,  $CHCl_3$ ). The major diastereoisomer:  $^1H$  NMR (400 MHz,  $CDCl_3$ )  $\delta$  8.92 (d, *J* = 2.5 Hz, 1H), 8.03 (dd, *J* = 8.7, 2.5 Hz, 1H), 7.75-7.65 (m, 3H), 7.47 (s, 1H), 7.45-7.35 (m, 7H), 7.31 (dd, *J* = 8.5, 1.4 Hz, 1H), 7.24-7.21 (m, 1H), 6.33-6.18 (m, 1H), 5.70-5.55 (m, 1H), 5.11 (s, 1H), 3.65 (s, 3H), 3.28-3.11 (m, 1H), 2.66-2.50 (m, 1H).  $^{13}C$  NMR (100 MHz,  $CDCl_3$ )  $\delta$  208.1, 190.5, 168.9, 149.6, 145.5, 134.2, 133.5, 132.6, 131.1, 130.8, 129.5, 129.2, 128.8, 128.3, 128.1, 127.7, 127.7, 126.5, 126.4, 125.9, 125.7, 125.6, 124.5, 96.6, 89.6, 62.2, 52.7, 51.0, 32.0. HPLC: Chiralpak IB column, 254 nm, 30 °C,

*n*-Hexane/*i*-PrOH = 80/20, flow = 1.0 mL/min, retention time 12.7 min (minor) and 22.5 min (major). HRMS Calculated for C<sub>31</sub>H<sub>24</sub>NO<sub>5</sub>S [M+H]<sup>+</sup> 522.1370, found: 522.1377.

---

**Methyl 4-oxo-2-phenyl-3-(4-(*o*-tolyl)buta-2,3-dien-1-yl)thiochromane-3-carboxylate (3cb):**

The reaction was conducted at -20 °C for 72 h. 81.7 mg, 93% yield, pale yellow viscous liquid, new compound, R<sub>f</sub> = 0.43 (hexanes/ethyl acetate 20/1), 32.3:1 dr, 99% ee (major diastereoisomer),

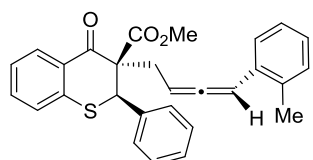

[α]<sub>D</sub><sup>20</sup> = -193.32 (*c* 0.96, CHCl<sub>3</sub>). The major diastereoisomer: <sup>1</sup>H NMR (400 MHz, CDCl<sub>3</sub>) δ 8.17 (dd, *J* = 8.2, 1.4 Hz, 1H), 7.48-7.21 (m, 9H), 7.20-7.03 (m, 3H), 6.47-6.18 (m, 1H), 5.61-5.38 (m, 1H), 4.99 (s, 1H), 3.64 (s, 3H), 3.23-3.01 (m, 1H), 2.68-2.53 (m, 1H), 2.24 (s, 3H). <sup>13</sup>C NMR (100 MHz, CDCl<sub>3</sub>) δ 208.0, 192.4, 169.7, 141.6, 135.6, 135.0, 133.3, 132.2, 130.8, 130.5, 130.4, 129.2, 128.9, 128.5, 127.5, 127.3, 127.0, 126.1, 125.6, 92.8, 88.9, 62.7, 52.4, 51.2, 32.5, 19.8. HPLC: Chiralcel OD-H column, 254 nm, 30 °C, *n*-Hexane/*i*-PrOH = 95/5, flow = 1.0 mL/min, retention time 10.1 min and 25.1 min (major). HRMS Calculated for C<sub>28</sub>H<sub>24</sub>NaO<sub>3</sub>S [M+Na]<sup>+</sup> 463.1338, found: 463.1342.

---

**(-)-Methyl -oxo-2-phenyl-3-(4-(*m*-tolyl)buta-2,3-dien-1-yl)thiochromane-3-carboxylate(3cc):**

The reaction was conducted at -20 °C for 72 h. 86.1 mg, 98% yield, pale yellow viscous liquid, new compound, R<sub>f</sub> = 0.43 (hexanes/ethyl acetate 20/1), 49.0:1 dr, 99% ee (major diastereoisomer),

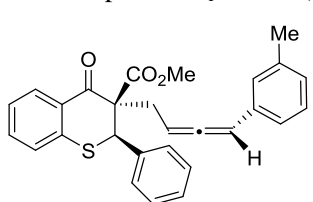

[α]<sub>D</sub><sup>20</sup> = -213.13 (*c* 0.70, CHCl<sub>3</sub>). The major diastereoisomer: <sup>1</sup>H NMR (400 MHz, CDCl<sub>3</sub>) δ 8.23-8.11 (m, 1H), 7.44-7.31 (m, 6H), 7.26-7.22 (m, 2H), 7.16-7.10 (m, 1H), 7.01-6.95 (m, 3H), 6.16-5.97 (m, 1H), 5.59-5.42 (m, 1H), 4.99 (s, 1H), 3.65 (s, 3H), 3.19-3.07 (m, 1H), 2.65-2.55 (m, 1H), 2.28 (s, 3H). <sup>13</sup>C NMR (100 MHz, CDCl<sub>3</sub>) δ 207.4, 192.4, 169.7, 141.5, 138.1, 135.6, 133.8, 133.2, 130.9, 130.5, 129.1, 128.9, 128.5, 128.5, 127.9, 127.5, 127.3, 125.5, 124.0, 95.6, 89.7, 62.7, 52.3, 51.1, 32.5, 21.3. HPLC: Chiralcel OD-H column, 254 nm, 30 °C, *n*-Hexane/*i*-PrOH = 95/5, flow = 1.0 mL/min, retention time 9.7 min and 21.8 min (major). HRMS Calculated for C<sub>28</sub>H<sub>24</sub>NaO<sub>3</sub>S [M+Na]<sup>+</sup> 463.1338, found: 463.1341.

---

**(-)-Methyl 4-oxo-2-phenyl-3-(4-(*p*-tolyl)buta-2,3-dien-1-yl)thiochromane-3-carboxylate (3cd):**

The reaction was conducted at -20 °C for 72 h. 84.5 mg, 96% yield, pale yellow viscous liquid, new compound, R<sub>f</sub> = 0.43 (hexanes/ethyl acetate 20/1), 32.3:1 dr, 99% ee (major diastereoisomer),

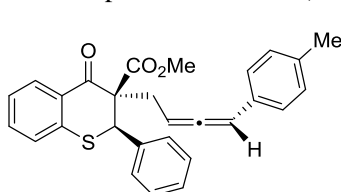

[α]<sub>D</sub><sup>20</sup> = -193.85 (*c* 0.57, CHCl<sub>3</sub>). The major diastereoisomer: <sup>1</sup>H NMR (400 MHz, CDCl<sub>3</sub>) δ 8.22-8.11 (m, 1H), 7.43-7.31 (m, 6H), 7.26-7.22 (m, 2H), 7.12-7.01 (m, 4H), 6.19-5.94 (m, 1H), 5.59-5.40 (m, 1H), 4.99 (s, 1H), 3.65 (s, 3H), 3.19-3.04 (m, 1H), 2.66-2.54 (m, 1H), 2.30 (s, 3H). <sup>13</sup>C NMR (100 MHz, CDCl<sub>3</sub>) δ 207.2, 192.5, 169.7, 141.5, 136.8, 135.6, 133.2, 130.9, 130.9, 130.5, 129.3, 129.1, 128.9, 128.5, 127.3, 126.7, 125.5, 95.4, 89.7, 62.7, 52.3, 51.1, 32.6, 21.2. HPLC: Chiralcel OD-H column, 254 nm, 30 °C, *n*-Hexane/*i*-PrOH = 95/5, flow = 1.0 mL/min, retention time 9.6 min and 18.8 min (major). HRMS Calculated for C<sub>28</sub>H<sub>24</sub>NaO<sub>3</sub>S [M+Na]<sup>+</sup> 463.1338, found: 463.1342.

---

**(-)-Methyl 3-(4-(3-fluorophenyl)buta-2,3-dien-1-yl)-4-oxo-2-phenylthiochromane-3-carboxylate (3ce):** The reaction was conducted at -20 °C for 120 hours. 83.7 mg, 94% yield, pale yellow viscous liquid, new compound,  $R_f = 0.38$  (hexanes/ethyl acetate 20/1), 32.3:1 dr, 99% ee (major

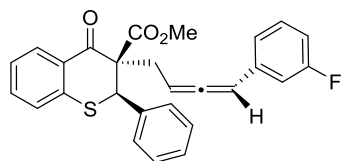

diastereoisomer),  $[\alpha]_D^{20} = -179.28$  ( $c$  0.85,  $\text{CHCl}_3$ ). The major diastereoisomer:  $^1\text{H NMR}$  (400 MHz,  $\text{CDCl}_3$ )  $\delta$  8.20-8.13 (m, 1H), 7.43-7.32 (m, 6H), 7.27-7.17 (m, 3H), 6.98-6.92 (m, 1H), 6.91-6.80 (m, 2H), 6.16-5.95 (m, 1H), 5.69-5.48 (m, 1H), 4.94 (s, 1H), 3.65 (s, 3H), 3.20-3.02 (m, 1H), 2.69-2.47 (m, 1H).  $^{13}\text{C NMR}$  (100 MHz,  $\text{CDCl}_3$ )  $\delta$  207.6, 192.3, 169.6, 163.1 (d,  $^1J_{\text{F-C}} = 245.2$  Hz), 141.5, 136.5 (d,  $^3J_{\text{F-C}} = 7.7$  Hz), 135.5, 133.3, 130.8, 130.5, 129.9 (d,  $^3J_{\text{F-C}} = 8.3$  Hz), 129.2, 128.9, 128.5, 127.2, 125.6, 122.6 (d,  $^4J_{\text{F-C}} = 2.7$  Hz), 113.9 (d,  $^2J_{\text{F-C}} = 21.3$  Hz), 113.4 (d,  $^2J_{\text{F-C}} = 22.4$  Hz), 94.8 (d,  $^4J_{\text{F-C}} = 2.5$  Hz), 90.4, 62.6, 52.4, 51.3, 32.4.  $^{19}\text{F NMR}$  (376 MHz,  $\text{CDCl}_3$ )  $\delta$  -113.49. HPLC: Chiralcel OD-3 column, 254 nm, 30 °C,  $n$ -Hexane/ $i$ -PrOH = 95/5, flow = 0.8 mL/min, retention time 12.3 min and 35.0 min (major). HRMS Calculated for  $\text{C}_{27}\text{H}_{21}\text{FNaO}_3\text{S}$   $[\text{M}+\text{Na}]^+$  467.1088, found: 467.1084.

---

**(-)-Methyl 3-(4-(3-chlorophenyl)buta-2,3-dien-1-yl)-4-oxo-2-phenylthiochromane-3-carboxylate (3cf):** The reaction was conducted at -20 °C for 120 hours. 83.1 mg, 90% yield, pale yellow viscous liquid, new compound,  $R_f = 0.38$  (hexanes/ethyl acetate 20/1), 32.3:1 dr, 99% ee (major

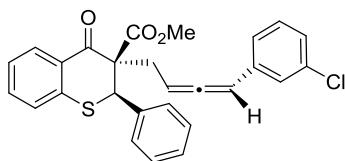

diastereoisomer),  $[\alpha]_D^{20} = -188.92$  ( $c$  0.84,  $\text{CHCl}_3$ ). The major diastereoisomer:  $^1\text{H NMR}$  (400 MHz,  $\text{CDCl}_3$ )  $\delta$  8.21-8.14 (m, 1H), 7.44- 7.32 (m, 6H), 7.27-7.23 (m, 2H), 7.20-7.10 (m, 3H), 7.08-7.01 (m, 1H), 6.16-5.92 (m, 1H), 5.67-5.51 (m, 1H), 4.93 (s, 1H), 3.65 (s, 3H), 3.17-3.06 (m, 1H), 2.65-2.55 (m, 1H).  $^{13}\text{C NMR}$  (100 MHz,  $\text{CDCl}_3$ )  $\delta$  207.6, 192.3, 169.6, 141.5, 136.1, 135.5, 134.5, 133.3, 130.8, 130.5, 129.7, 129.2, 129.0, 128.5, 127.2, 127.0, 126.7, 125.6, 125.0, 94.6, 90.4, 62.6, 52.4, 51.3, 32.4. HPLC: Chiralcel OD-3 column, 254 nm, 30 °C,  $n$ -Hexane/ $i$ -PrOH = 95/5, flow = 0.8 mL/min, retention time 12.7 min (minor) and 37.3 min (major). HRMS Calculated for  $\text{C}_{27}\text{H}_{22}\text{ClO}_3\text{S}$   $[\text{M}+\text{H}]^+$  461.0973 ( $^{35}\text{Cl}$ ) and 463.0953 ( $^{37}\text{Cl}$ ), found: 461.0969 ( $^{35}\text{Cl}$ ) and 463.0938 ( $^{37}\text{Cl}$ ).

---

**(-)-Methyl 3-(4-(3-bromophenyl)buta-2,3-dien-1-yl)-4-oxo-2-phenylthiochromane-3-carboxylate (3cg):** The reaction was conducted at -20 °C for 120 hours. 94.4 mg, 93% yield, pale yellow viscous liquid, new compound,  $R_f = 0.38$  (hexanes/ethyl acetate 20/1), 32.3:1 dr, 98% ee (major

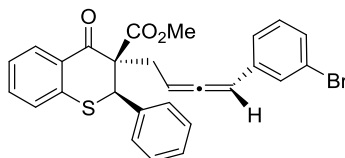

diastereoisomer),  $[\alpha]_D^{20} = -173.55$  ( $c$  0.87,  $\text{CHCl}_3$ ). The major diastereoisomer:  $^1\text{H NMR}$  (400 MHz,  $\text{CDCl}_3$ )  $\delta$  8.18 (dd,  $J = 7.8$ , 1.0 Hz, 1H), 7.43-7.23 (m, 10H), 7.15-7.05 (m, 2H), 6.15-5.93 (m, 1H), 5.73-5.50 (m, 1H), 4.93 (s, 1H), 3.65 (s, 3H), 3.23-3.01 (m, 1H), 2.72-2.48 (m, 1H).  $^{13}\text{C NMR}$  (100 MHz,  $\text{CDCl}_3$ )  $\delta$  207.6, 192.3, 169.6, 141.5, 136.3, 135.5, 133.3, 130.8, 130.5, 130.0, 129.9, 129.6, 129.2, 129.0, 128.6, 127.3, 125.6, 125.4, 122.8, 94.5, 90.5, 62.6, 52.4, 51.3, 32.4. HPLC: Chiralcel OD-3 column, 254 nm, 30 °C,  $n$ -Hexane/ $i$ -PrOH = 95/5, flow = 0.8 mL/min, retention time 13.1 min and 39.9 min (major). HRMS Calculated for  $\text{C}_{27}\text{H}_{22}\text{BrO}_3\text{S}$   $[\text{M}+\text{H}]^+$  505.0468 ( $^{79}\text{Br}$ ) and 507.0450 ( $^{81}\text{Br}$ ), found: 505.0471 ( $^{79}\text{Br}$ ) and 507.0454 ( $^{81}\text{Br}$ ).

---

---

**(-)-Methyl 3-(4-(3-methoxyphenyl)buta-2,3-dien-1-yl)-4-oxo-2-phenylthiochromane-3-carboxylate (3ch):** The reaction was conducted at -20 °C for 72 hours. 84.6 mg, 93% yield, pale yellow viscous liquid, new compound,  $R_f = 0.20$  (hexanes/ethyl acetate 20/1), 32.3:1 dr, 99% ee (major diastereoisomer),  $[\alpha]_D^{20} = -192.34$  ( $c$  1.02,  $\text{CHCl}_3$ ). The major diastereoisomer:  $^1\text{H NMR}$  (400 MHz,  $\text{CDCl}_3$ )  $\delta$  8.27-8.04 (m, 1H), 7.42-7.29 (m, 6H), 7.25-7.21 (m, 2H), 7.17-7.12 (m, 1H), 6.80-6.67 (m, 3H), 6.11-5.99 (m, 1H), 5.61-5.42 (m, 1H), 4.98 (s, 1H), 3.76 (s, 3H), 3.64 (s, 3H), 3.17- 3.05 (m, 1H),

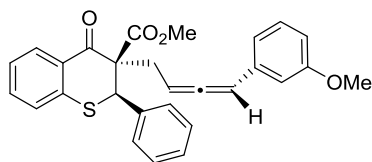

2.65-2.54 (m, 1H).  $^{13}\text{C NMR}$  (100 MHz,  $\text{CDCl}_3$ )  $\delta$  207.4, 192.4, 169.7, 159.9, 141.5, 135.6, 135.4, 133.2, 130.8, 130.5, 129.5, 129.2, 128.9, 128.5, 127.3, 125.5, 119.5, 113.1, 111.9, 95.6, 90.0, 62.7, 55.2, 52.3, 51.2, 32.4. HPLC: Chiralcel OD-3 column, 254 nm, 30 °C,  $n$ -Hexane/ $i$ -PrOH = 94/6, flow = 0.8 mL/min, retention time 14.7 min and 32.0 min (major). HRMS Calculated for  $\text{C}_{28}\text{H}_{25}\text{O}_4\text{S}$   $[\text{M}+\text{H}]^+$  457.1468, found: 457.1473.

---

**(-)-Methyl 3-(4-(3,5-dimethylphenyl)buta-2,3-dien-1-yl)-4-oxo-2-phenylthiochromane-3-carboxylate (3ci):** The reaction was conducted at -20 °C for 120 h. 89.1 mg, 98% yield, pale yellow viscous liquid, new compound,  $R_f = 0.33$  (hexanes/ethyl acetate 20/1), 49.0:1 dr, 99% ee (major diastereoisomer),  $[\alpha]_D^{20} = -195.93$  ( $c$  0.74,  $\text{CHCl}_3$ ). The major diastereoisomer:  $^1\text{H NMR}$  (400 MHz,  $\text{CDCl}_3$ )  $\delta$  8.25-8.08 (m, 1H), 7.43-7.29 (m, 6H), 7.26-7.22 (m, 2H), 6.87-6.72 (m, 3H), 6.13-5.92 (m, 1H), 5.57-5.39 (m, 1H), 5.00 (s, 1H), 3.65 (s, 3H), 3.25-3.06 (m, 1H), 2.66-2.53 (m, 1H), 2.24 (s, 6H).  $^{13}\text{C NMR}$

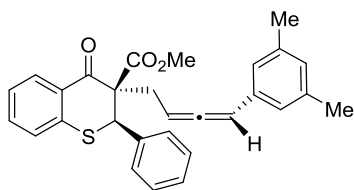

(100 MHz,  $\text{CDCl}_3$ )  $\delta$  207.5, 192.4, 169.8, 141.5, 138.0, 135.6, 133.7, 133.2, 130.9, 130.5, 129.1, 128.8, 128.5, 127.3, 125.5, 124.7, 95.7, 89.5, 62.7, 52.3, 51.0, 32.5, 21.2. HPLC: Chiralcel OD-H column, 254 nm, 30 °C,  $n$ -Hexane/ $i$ -PrOH = 96/4, flow = 1.0 mL/min, retention time 9.3 min and 20.1 min (major). HRMS Calculated for  $\text{C}_{29}\text{H}_{27}\text{O}_3\text{S}$   $[\text{M}+\text{H}]^+$  455.1675, found: 455.1682.

---

**(-)-Methyl 3-(4-([1,1'-biphenyl]-4-yl)buta-2,3-dien-1-yl)-4-oxo-2-phenylthiochromane-3-carboxylate (3cj):** The reaction was conducted at -20 °C for 120 h. 96.2 mg, 96% yield, pale yellow viscous liquid, new compound,  $R_f = 0.31$  (hexanes/ethyl acetate 20/1), 49.0:1 dr, 99% ee (major diastereoisomer),  $[\alpha]_D^{20} = -186.99$  ( $c$  1.10,  $\text{CHCl}_3$ ). The major diastereoisomer:  $^1\text{H NMR}$  (400 MHz,  $\text{CDCl}_3$ )  $\delta$  8.22-8.12 (m, 1H), 7.58-7.53 (m, 2H), 7.50-7.45 (m, 2H), 7.43-7.30 (m, 9H), 7.26-7.22 (m, 4H), 6.22-6.04 (m, 1H), 5.66-5.48 (m, 1H), 5.00 (s, 1H), 3.65 (s, 3H), 3.21-3.03 (m, 1H), 2.69-2.56 (m, 1H).  $^{13}\text{C NMR}$

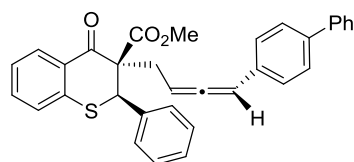

(100 MHz,  $\text{CDCl}_3$ )  $\delta$  207.6, 192.4, 169.7, 141.5, 140.8, 139.9, 135.6, 133.3, 133.0, 130.8, 130.5, 129.2, 128.9, 128.8, 128.5, 127.3, 126.9, 125.6, 95.2, 90.0, 62.7, 52.4, 51.2, 32.5. HPLC: Chiralpak ID + IC column, 254 nm, 30 °C,  $n$ -Hexane/ $i$ -PrOH = 94/6, flow = 1.0 mL/min, retention time 43.1 min (major) and 47.4 min (minor). HRMS Calculated for  $\text{C}_{33}\text{H}_{27}\text{O}_3\text{S}$   $[\text{M}+\text{H}]^+$  503.1675, found: 503.1673.

---

---

**(-)-Methyl 3-(4-(naphthalen-2-yl)buta-2,3-dien-1-yl)-4-oxo-2-phenylthiochromane-3-carboxylate (3ck):** The reaction was conducted at -20 °C for 120 h. 90.4 mg, 95% yield, pale yellow viscous liquid, new compound,  $R_f = 0.30$  (hexanes/ethyl acetate 20/1), 24.0:1 dr, 99% ee (major diastereoisomer),  $[\alpha]_D^{20} = -160.81$  ( $c$  1.10,  $\text{CHCl}_3$ ). The major diastereoisomer:  $^1\text{H}$  NMR (400 MHz,  $\text{CDCl}_3$ )  $\delta$  8.18 (dd,  $J = 7.9, 1.1$  Hz, 1H), 7.76-7.67 (m, 3H), 7.55-7.52 (m, 1H), 7.45-7.31 (m, 9H), 7.24-7.19 (m, 2H), 6.35-6.16 (m, 1H), 5.69-5.50 (m, 1H), 5.01 (s, 1H), 3.64 (s, 3H), 3.23-3.07 (m, 1H), 2.70-

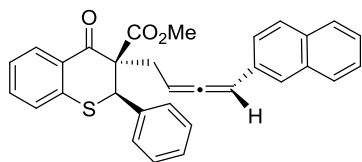

2.59 (m, 1H).  $^{13}\text{C}$  NMR (100 MHz,  $\text{CDCl}_3$ )  $\delta$  208.0, 192.4, 169.7, 141.5, 135.6, 133.6, 133.2, 132.7, 131.5, 130.8, 130.5, 129.2, 128.9, 128.5, 128.2, 127.7, 127.7, 127.3, 126.2, 125.7, 125.6, 124.8, 95.9, 90.2, 62.8, 52.4, 51.2, 32.6. HPLC: Chiralpak IC column, 254 nm, 30 °C,  $n$ -Hexane/ $i$ -PrOH = 94/6, flow = 1.0 mL/min, retention time 20.5 min (minor) and 22.8 min (major). HRMS Calculated for  $\text{C}_{31}\text{H}_{28}\text{NO}_3\text{S}$   $[\text{M}+\text{NH}_4]^+$  494.1784, found: 494.1777.

---

**(-)-Methyl 4-oxo-2-phenyl-3-(4-(thiophen-3-yl)buta-2,3-dien-1-yl)thiochromane-3-carboxylate (3cl):** The reaction was conducted at -20 °C for 120 h. 78.2 mg, 90% yield, pale yellow viscous liquid, new compound,  $R_f = 0.32$  (hexanes/ethyl acetate 20/1), 32.3:1 dr, 98% ee (major diastereoisomer),  $[\alpha]_D^{20} = -187.60$  ( $c$  0.92,  $\text{CHCl}_3$ ). The major diastereoisomer:  $^1\text{H}$  NMR (400 MHz,  $\text{CDCl}_3$ )  $\delta$  8.22-8.13 (m, 1H), 7.42-7.32 (m, 6H), 7.25-7.18 (m, 3H), 6.99-6.91 (m, 2H), 6.31-5.97 (m, 1H), 5.52-5.41 (m, 1H), 4.97 (s, 1H), 3.64 (s, 3H), 3.15-3.05 (m, 1H), 2.63-2.54 (m, 1H).  $^{13}\text{C}$  NMR (100 MHz,  $\text{CDCl}_3$ )  $\delta$  207.6, 192.4,

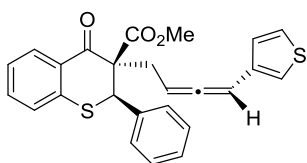

169.7, 141.5, 135.6, 135.1, 133.2, 130.8, 130.5, 129.2, 128.9, 128.5, 127.3, 126.3, 125.9, 125.5, 121.0, 90.1, 89.1, 62.7, 52.3, 51.1, 32.6. HPLC: Chiralcel OD-3 column, 254 nm, 30 °C,  $n$ -Hexane/ $i$ -PrOH = 93/7, flow = 0.8 mL/min, retention time 11.9 min (minor) and 25.4 min (major). HRMS Calculated for  $\text{C}_{25}\text{H}_{24}\text{NO}_3\text{S}_2$   $[\text{M}+\text{NH}_4]^+$  450.1192, found: 450.1182.

---

**(-)-Methyl 4-oxo-3-(penta-2,3-dien-1-yl)-2-phenylthiochromane-3-carboxylate (3cm):**

The reaction was conducted at -20 °C for 120 h. 39.3 mg, 54% yield, pale yellow viscous liquid, new compound,  $R_f = 0.39$  (hexanes/ethyl acetate 20/1), 7.3:1 dr, 97% ee (major diastereoisomer),

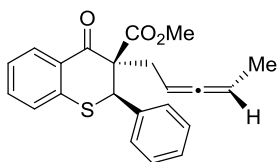

$[\alpha]_D^{20} = -173.75$  ( $c$  0.85,  $\text{CHCl}_3$ ). The major diastereoisomer:  $^1\text{H}$  NMR (400 MHz,  $\text{CDCl}_3$ )  $\delta$  8.29-8.02 (m, 1H), 7.44-7.31 (m, 6H), 7.28-7.22 (m, 2H), 5.08-4.92 (m, 3H), 3.66 (s, 3H), 3.06-2.95 (m, 1H), 2.52-2.40 (m, 1H), 1.55-1.48 (m, 3H).  $^{13}\text{C}$  NMR (100 MHz,  $\text{CDCl}_3$ )  $\delta$  207.0, 192.6, 169.8, 141.4, 135.7, 133.1, 131.0, 130.4, 129.1, 128.8, 128.4, 127.3, 125.5, 86.8, 85.2, 63.0, 52.3, 50.7, 32.6, 14.1. HPLC: Chiralpak AD-3 column, 254 nm, 30 °C,  $n$ -Hexane/ $i$ -PrOH = 97/3, flow = 0.8 mL/min, retention time 18.8 min and 19.8 min (major). HRMS Calculated for  $\text{C}_{22}\text{H}_{21}\text{O}_3\text{S}$   $[\text{M}+\text{H}]^+$  365.1206, found: 365.1208.

---

**(-)-Methyl 4-oxo-2-phenyl-3-(4-phenylpenta-2,3-dien-1-yl)thiochromane-3-carboxylate (3cn):**

The reaction was conducted at 30 °C for 120 h. 63.7 mg, 72% yield, pale yellow viscous liquid, new compound,  $R_f = 0.41$  (hexanes/ethyl acetate 20/1), 6.7:1 dr, 90% ee (major diastereoisomer),

$[\alpha]_D^{20} = -109.42$  ( $c$  0.88,  $\text{CHCl}_3$ ). The major diastereoisomer:  $^1\text{H NMR}$  (400 MHz,  $\text{CDCl}_3$ )  $\delta$  8.17 (dd,  $J = 7.9, 1.1$  Hz, 1H), 7.41-7.37 (m, 1H), 7.36-7.29 (m, 5H), 7.28-7.12 (m, 7H), 5.45-5.32 (m,

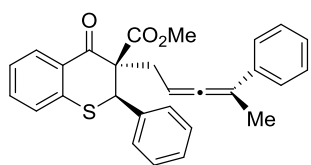

1H), 5.01 (s, 1H), 3.62 (s, 3H), 3.22-3.10 (m, 1H), 2.65-2.50 (m, 1H), 1.99 (d,  $J = 2.9$  Hz, 3H).  $^{13}\text{C NMR}$  (100 MHz,  $\text{CDCl}_3$ )  $\delta$  206.8, 192.3, 169.8, 141.4, 136.7, 135.9, 133.2, 130.7, 130.4, 128.9, 128.8, 128.5, 128.3, 127.3, 126.9, 125.8, 125.4, 101.9, 87.7, 62.7, 52.3, 50.4, 32.7, 16.9. HPLC: Chiralpak AD-H column, 254 nm, 30 °C,

$n$ -Hexane/ $i$ -Pr- OH = 96/4, flow = 1.0 mL/min, retention time 14.0 min and 17.1 min (major).

HRMS Calculated for  $\text{C}_{28}\text{H}_{24}\text{NaO}_3\text{S}$   $[\text{M}+\text{Na}]^+$  463.1338, found: 463.1346.

## The Chemo- or Regioselective Isomers with the Different EWG

**2-Benzylidene-1-(2-((1-phenylbuta-1,3-dien-2-yl)thio)phenyl)-3-(piperidin-1-yl)propane-1,3-dione (4'da):** 46.1 mg, 48% yield, yellow viscous liquid, new compound,  $R_f = 0.18$  (hexanes/ethyl acetate 5/1), 16.7/1 ( $Z/E$  or  $E/Z$ ). The major diastereoisomer:  $^1\text{H NMR}$  (400 MHz,  $\text{CDCl}_3$ )  $\delta$  7.56-

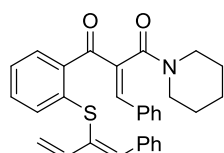

7.42 (m, 4H), 7.41-7.26 (m, 10H), 7.09 (s, 1H), 7.00 (s, 1H), 6.83 (dd,  $J = 16.8, 10.5$  Hz, 1H), 5.74 (d,  $J = 16.8$  Hz, 1H), 5.28 (d,  $J = 10.6$  Hz, 1H), 3.89-3.62 (m, 2H), 3.57-3.26 (m, 2H), 1.77-1.45 (m, 5H), 1.20-0.96 (m, 1H).

$^{13}\text{C NMR}$  (100 MHz,  $\text{CDCl}_3$ )  $\delta$  194.7, 165.5, 143.8, 139.2, 137.2, 136.1, 134.4, 133.4, 133.2, 131.7, 131.2, 130.8, 130.6, 130.0, 129.4, 129.0, 128.9, 128.4, 127.9, 126.3, 120.1, 47.8, 42.4, 26.1, 25.3, 24.6. HRMS Calculated for  $\text{C}_{31}\text{H}_{30}\text{NO}_2\text{S}$   $[\text{M}+\text{H}]^+$  480.1992, found: 480.2001. (The  $Z/E$  configuration of carbon-carbon double bond is not further assigned)

**(-)-2-Nitro-3-phenyl-1-(2-((4-phenylbuta-2,3-dien-1-yl)thio)phenyl)prop-2-en-1-one (4aa):**

The reaction was conducted at 30 °C for 24 h with **L1**. 59.3 mg, 72% yield, pale yellow viscous

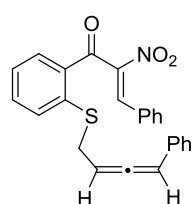

liquid, new compound,  $R_f = 0.26$  (hexanes/ethyl acetate 20/1), 84% ee, single isomer,  $[\alpha]_D^{20} = -178.56$  ( $c$  0.63,  $\text{CHCl}_3$ ).  $^1\text{H NMR}$  (400 MHz,  $\text{CDCl}_3$ )  $\delta$  8.67-8.48 (m, 1H), 7.61-7.50 (m, 3H), 7.48-7.18 (m, 10H), 7.18-7.12 (m, 1H), 6.15-6.01 (m, 1H), 5.90-5.75 (m, 1H), 3.47-3.32 (m, 2H).  $^{13}\text{C NMR}$  (100 MHz,  $\text{CDCl}_3$ )  $\delta$  205.8, 179.7, 149.9, 137.5, 136.3, 134.6, 132.8, 131.3, 130.5, 129.5,

129.2, 128.7, 128.6, 128.5, 127.4, 126.8, 126.7, 125.6, 95.6, 93.5, 28.6. HPLC: Chiralpak IA column, 254 nm, 30 °C,  $n$ -Hexane/ $i$ -PrOH = 94/6, flow = 1.0 mL/min, retention time 15.2 min and 16.2 min (major). HRMS Calculated for  $\text{C}_{25}\text{H}_{19}\text{KNO}_3\text{S}$   $[\text{M}+\text{K}]^+$  452.0717, found: 452.0731. (The absolute configuration of allene moiety is not further assigned)

## 4. Scale-up Synthesis

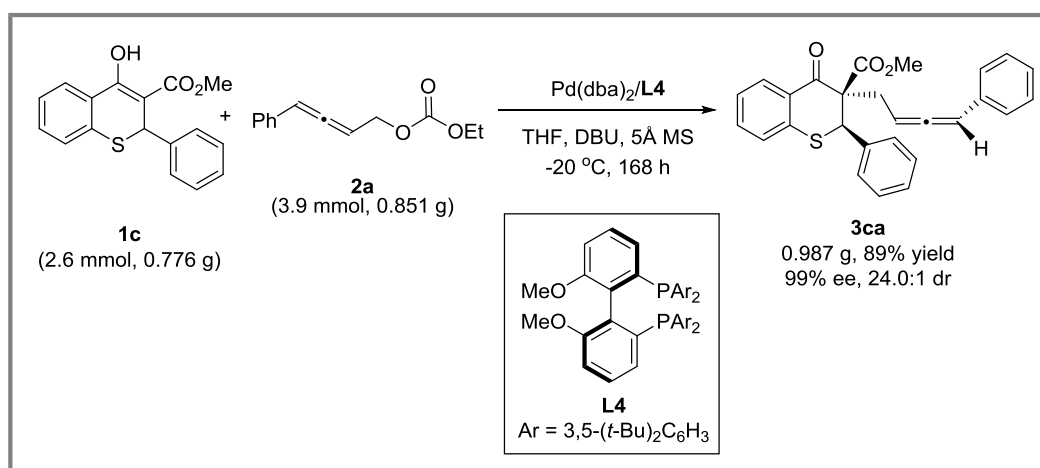

The metal precursor Pd(dba)<sub>2</sub> (0.26 mmol, 0.150 g), the chiral ligand (*R*)-DTB-BIPHEP (**L4**) (0.286 mmol, 0.295 g) and tetrahydrofuran (23 mL) were placed in a dried Schlenk tube under nitrogen atmosphere. The mixture was stirred at 30 °C for 30 min. Then, the mixture was cooled to -20 °C. Then, the substrate thiochromanone **1c** (2.6 mmol, 0.776 g), 5Å MS (0.650 g) and 1,8-diazabicyclo[5,4,0]undec-7-ene (DBU, 3.12 mmol, 0.47 mL) were added, and the reaction was stirred at -20 °C for 10 minutes. Sequentially, allenyllic carbonate **2a** (3.9 mmol, 0.851 g) and tetrahydrofuran (3.0 mL) were added slowly. The mixture was stirred at -20 °C for 168 hours. After the completion of the reaction, the volatiles were directly removed under the reduced pressure. The crude residue was quickly purified by column chromatography on silica gel (hexanes/ethyl acetate /dichloromethane 100/1/2-100/3/6) to give the chiral allenyllic alkylation product **3ca** 0.987 g, 89% isolated yield, 24.0:1 dr and 99% ee for the major diastereoisomer.

The racemate was prepared by running reaction with an achiral 1,3-bis(diphenylphosphino)propane ligand at 30 °C. Notably, the product **3ca** was a little sensitive to water or alcohol, which would lead to slight decrease of dr value.

## 5. Product Elaborations

### 5.1. The Oxidation of Sulfide

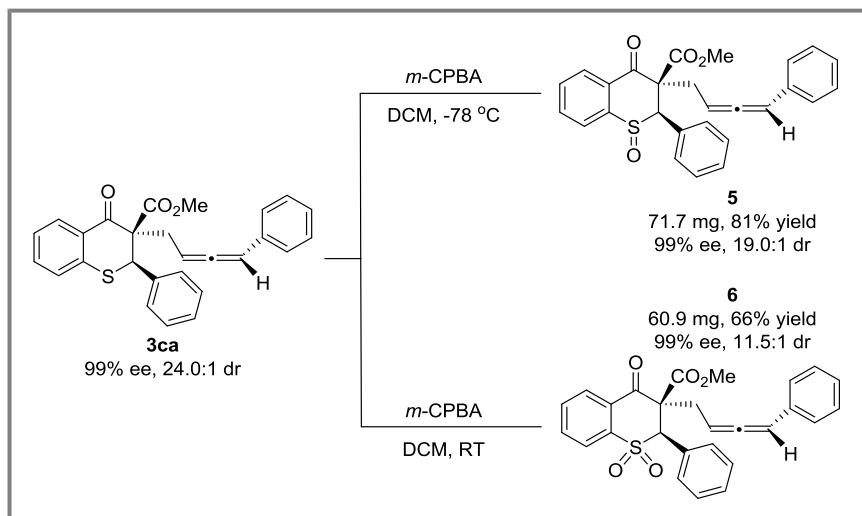

At -78 °C, to a solution of (-)-**3ca** (85.3 mg, 0.2 mmol, 99% ee) in dichloromethane (3.0 mL) was added 3-chloroperoxybenzoic acid (*m*-CPBA) (60.9 mg, 0.3 mmol, 85%) in dichloromethane (2.0 mL). The mixture was stirred at -78 °C for 48 hours. Then, to the reaction mixture was added a solution of *m*-CPBA (60.9 mg, 0.3 mmol, 85%) in dichloromethane (10 mL). The mixture was stirred at -78 °C for another 48 hours. After that, it was quenched with aqueous sodium bicarbonate and warmed to room temperature. The aqueous layer was extracted with dichloromethane. The combined organic layer was dried over anhydrous sodium sulfate, filtered and concentrated under the reduced pressure. The residue was purified by flash chromatography on silica gel using hexanes/ethyl acetate (5/1-3/1) as eluent to give the oxidative product sulfoxide **5**.

**Methyl 4-oxo-2-phenyl-3-(4-phenylbuta-2,3-dien-1-yl)thiochromane-3-carboxylate 1-oxide (5):** 71.7 mg, 81% yield, colorless viscous liquid, new compound,  $R_f = 0.23$  (hexanes/ethyl acetate 3/1), 19.0:1 dr, 99% ee (major diastereoisomer),  $[\alpha]_D^{20} = -357.57$  ( $c$  1.00,  $\text{CHCl}_3$ ). The major diastereoisomer:  $^1\text{H NMR}$  (400 MHz,  $\text{CDCl}_3$ )  $\delta$  8.10 (d,  $J = 7.6$  Hz, 1H), 8.03 (d,  $J = 7.8$  Hz, 1H), 7.81 (t,  $J = 7.3$  Hz, 1H), 7.62 (t,  $J = 7.5$  Hz, 1H), 7.45-7.34 (m, 5H), 7.25-7.06 (m, 5H), 6.17-6.01 (m, 1H), 5.38-5.26 (m, 1H), 4.82 (s, 1H), 3.76 (s, 3H), 3.44-3.29 (m, 1H), 2.51-2.37 (m, 1H).  $^{13}\text{C NMR}$  (100 MHz,  $\text{CDCl}_3$ )  $\delta$  207.5, 190.8, 169.0, 147.6, 135.0, 133.3, 131.2, 129.9, 129.6, 129.6, 129.4, 129.1, 128.6, 127.3, 126.9, 96.1, 88.4, 70.5, 63.6, 53.1, 32.5. HPLC: Chiralpak AD-3 column, 254 nm, 30 °C, *n*-Hexane/*i*-PrOH = 70/30, flow = 0.7 mL/min, retention time 27.6 min (major) and 32.7 min. HRMS Calculated for  $\text{C}_{27}\text{H}_{22}\text{NaO}_4\text{S}$   $[\text{M}+\text{Na}]^+$  465.1131, found: 465.1139.

At room temperature, to a solution of (-)-**3ca** (85.3 mg, 0.2 mmol, 99% ee) in dichloromethane (3.0 mL) was added *m*-CPBA (121.8 mg, 0.6 mmol, 85%) in dichloromethane (2.0 mL). The mixture was stirred for 24 hours. Then, the reaction mixture was quenched with saturated sodium bicarbonate aqueous solution, and the aqueous layer was extracted three times with dichloromethane. The combined organic layer was dried over anhydrous sodium sulfate, filtered and concentrated under the reduced pressure. The residue was purified by flash chromatography on silica gel using hexanes/ethyl acetate (5/1) as eluent to give the oxidative product sulfone **6**.



---

**(-)-Methyl 4-oxo-2-phenyl-3-(4-phenylbuta-2,3-dien-1-yl)thiochromane-3-carboxylate 1,1-dioxide (6):** 60.9 mg, 66% yield, colorless viscous liquid, new compound,  $R_f = 0.51$  (hexanes/ ethyl acetate 3/1), 11.5:1 dr, 99% ee (major diastereoisomer),  $[\alpha]_D^{20} = -135.23$  ( $c$  1.05,  $\text{CHCl}_3$ ). The major diastereoisomer:  $^1\text{H NMR}$  (400 MHz,  $\text{CDCl}_3$ )  $\delta$  8.33-8.20 (m, 1H), 8.03-7.96 (m, 1H), 7.84-7.72 (m, 2H), 7.64-7.53 (m, 2H), 7.49-7.38 (m, 3H), 7.25-7.10 (m, 3H), 7.12-7.05 (m, 2H), 6.08-5.93 (m, 1H), 5.49-5.38 (m, 1H), 5.11 (s, 1H), 3.69 (s, 3H), 3.31-3.17 (m, 1H), 2.64-2.50 (m, 1H).  $^{13}\text{C NMR}$  (100 MHz,  $\text{CDCl}_3$ )  $\delta$  207.4, 189.6, 169.0, 141.6, 134.7, 133.4, 133.2, 131.8, 130.7, 130.2, 129.4, 128.7, 128.7, 127.4, 126.8, 125.7, 123.9, 96.5, 88.8, 68.3, 63.1, 53.3, 33.9. HPLC: Chiralpak IC column, 254 nm, 30 °C,  $n$ -Hexane/ $i$ -PrOH = 65/35, flow = 0.8 mL/min, retention time 22.8 min and 40.9 min (major). HRMS Calculated for  $\text{C}_{27}\text{H}_{22}\text{NaO}_5\text{S}$   $[\text{M}+\text{Na}]^+$  481.1080, found: 481.1078.

---

## 5.2. The Hydrogenation of Allenyl Functional Group

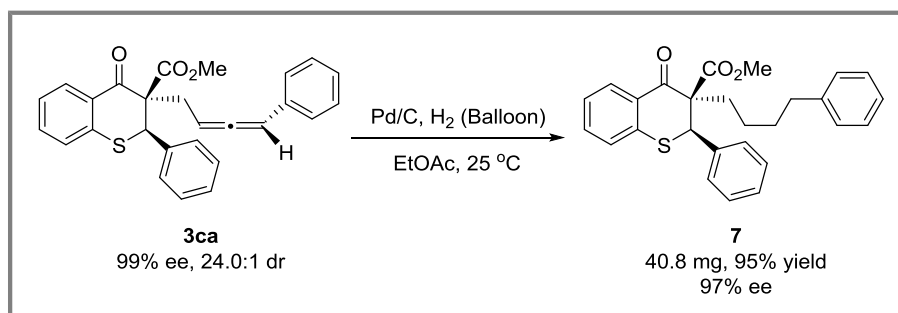

To a solution of the chiral allenyl alkylation product (-)-**3ca** (42.7 mg, 0.1 mmol, 99% ee) in ethyl acetate (1.0 mL) was added 10% Pd/C (5.3 mg, 0.005 mmol). The resulting mixture was degassed and stirred under hydrogen gas balloon pressure for about 13 hours at 25 °C. After the completion of hydrogenation, the volatiles were removed under the reduced pressure. The crude residue was purified by flash column chromatography on silica gel using hexanes/ethyl acetate (30/1-20/1) as eluent to give the desirable allene hydrogenation product (2*R*,3*S*)-(+)-**7**.

---

### **(2*R*,3*S*)-(+)-Methyl 4-oxo-2-phenyl-3-(4-phenylbutyl)thiochromane-3-carboxylate (7):**

40.8 mg, 95% yield, colorless liquid, new compound,  $R_f = 0.28$  (hexanes/ethyl acetate 20/1), 97% ee,  $[\alpha]_D^{20} = +14.31$  ( $c$  1.02,  $\text{CHCl}_3$ ).  $^1\text{H NMR}$  (400 MHz,  $\text{CDCl}_3$ )  $\delta$  8.16 (dd,  $J = 8.2, 1.3$  Hz, 1H), 7.43-7.37 (m, 1H), 7.33-7.22 (m, 9H), 7.18-7.09 (m, 3H), 4.68 (s, 1H), 3.61 (s, 3H), 2.62-2.44 (m, 2H), 2.17-2.05 (m, 1H), 1.93-1.80 (m, 1H), 1.63-1.48 (m, 3H), 1.27-1.17 (m, 1H).  $^{13}\text{C NMR}$  (100 MHz,  $\text{CDCl}_3$ )  $\delta$  192.7, 170.4, 142.4, 141.3, 136.1, 133.1, 130.9, 130.4, 129.0, 128.7, 128.5, 128.4, 128.3, 127.2, 125.7, 125.5, 62.6, 52.2, 51.9, 35.5, 32.8, 31.8, 24.2. HPLC: Chiralpak AD-H column, 254 nm, 30 °C,  $n$ -Hexane/ $i$ -PrOH = 95/5, flow = 1.0 mL/min, retention time 11.7 min and 14.4 min (major). HRMS Calculated for  $\text{C}_{27}\text{H}_{26}\text{NaO}_3\text{S}$   $[\text{M}+\text{Na}]^+$  453.1495, found: 453.1503.

---

### 5.3. The Reduction of Carbonyl Functional Group

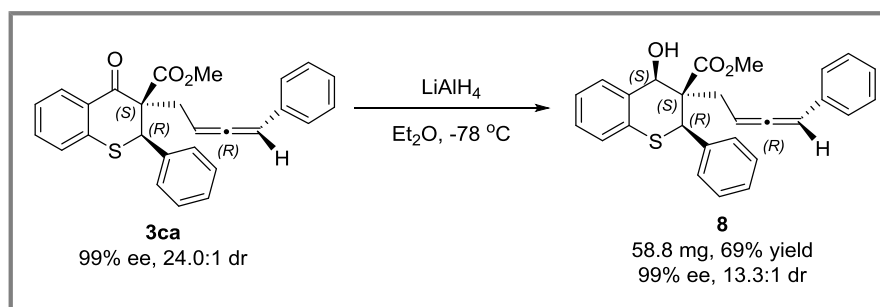

To a solution of lithium aluminium tetrahydride (15.2 mg, 0.4 mmol) in diethyl ether (7.0 mL) at -78 °C, the chiral compound (-)-**3ca** (85.3 mg, 0.2 mmol, 99% ee) and diethyl ether (1.0 mL) were added. The mixture was stirred at -78 °C for 5 hours. The reaction was quenched with 0.5 M potassium sodium tartrate aqueous solution (1.0 mL) and warmed to room temperature. After filtration through the celite, the combined organic layer was dried over sodium sulfate, filtered and concentrated under the reduced pressure. The residue was purified by column chromatography on silica gel using hexanes/ethyl acetate (20/1-10/1) as eluent to afford the desirable ketone carbonyl reductive product (-)-**8**.

The relative configuration of the hydroxyl group of the reductive product **8** was assigned as *S* by NOE.

---

**(-)-Methyl 4-hydroxy-2-phenyl-3-(4-phenylbuta-2,3-dien-1-yl)thiochromane-3-carboxylate 8:** 58.8 mg, 69% yield, colorless liquid, new compound,  $R_f = 0.48$  (hexanes/ethyl acetate 5/1), 13.3:1 dr, 99% ee (major diastereoisomer),  $[\alpha]_D^{20} = -33.73$  ( $c$  0.83, CHCl<sub>3</sub>). The major diastereoisomer: <sup>1</sup>H NMR (700 MHz, CDCl<sub>3</sub>)  $\delta$  7.52 (d,  $J = 7.5$  Hz, 1H), 7.49-7.42 (m, 2H), 7.29-7.17 (m, 11H), 6.15-6.08 (m, 1H), 5.56-5.53 (m, 1H), 5.17 (d,  $J = 6.3$  Hz, 1H), 4.58 (s, 1H), 3.55 (s, 3H), 3.43 (d,  $J = 6.4$  Hz, 1H), 2.87-2.82 (m, 1H), 2.52-2.48 (m, 1H). <sup>13</sup>C NMR (175 MHz, CDCl<sub>3</sub>)  $\delta$  207.0, 173.6, 138.6, 133.9, 133.9, 132.7, 130.4, 130.2, 128.6, 128.3, 127.9, 127.7, 127.1, 126.9, 125.8, 125.2, 94.8, 89.4, 72.3, 55.4, 52.0, 50.1, 36.4. HPLC: Chiralpak IA + AS-H column, 254 nm, 30 °C, *n*-Hexane/*i*-PrOH = 95/5, flow = 0.8 mL/min, retention time 62.0 min and 72.2 min (major). HRMS Calculated for C<sub>27</sub>H<sub>24</sub>NaO<sub>3</sub>S [M+Na]<sup>+</sup> 451.1338, found: 451.1335.

---

### The NOE Result of Carbonyl Reduction (-)-8

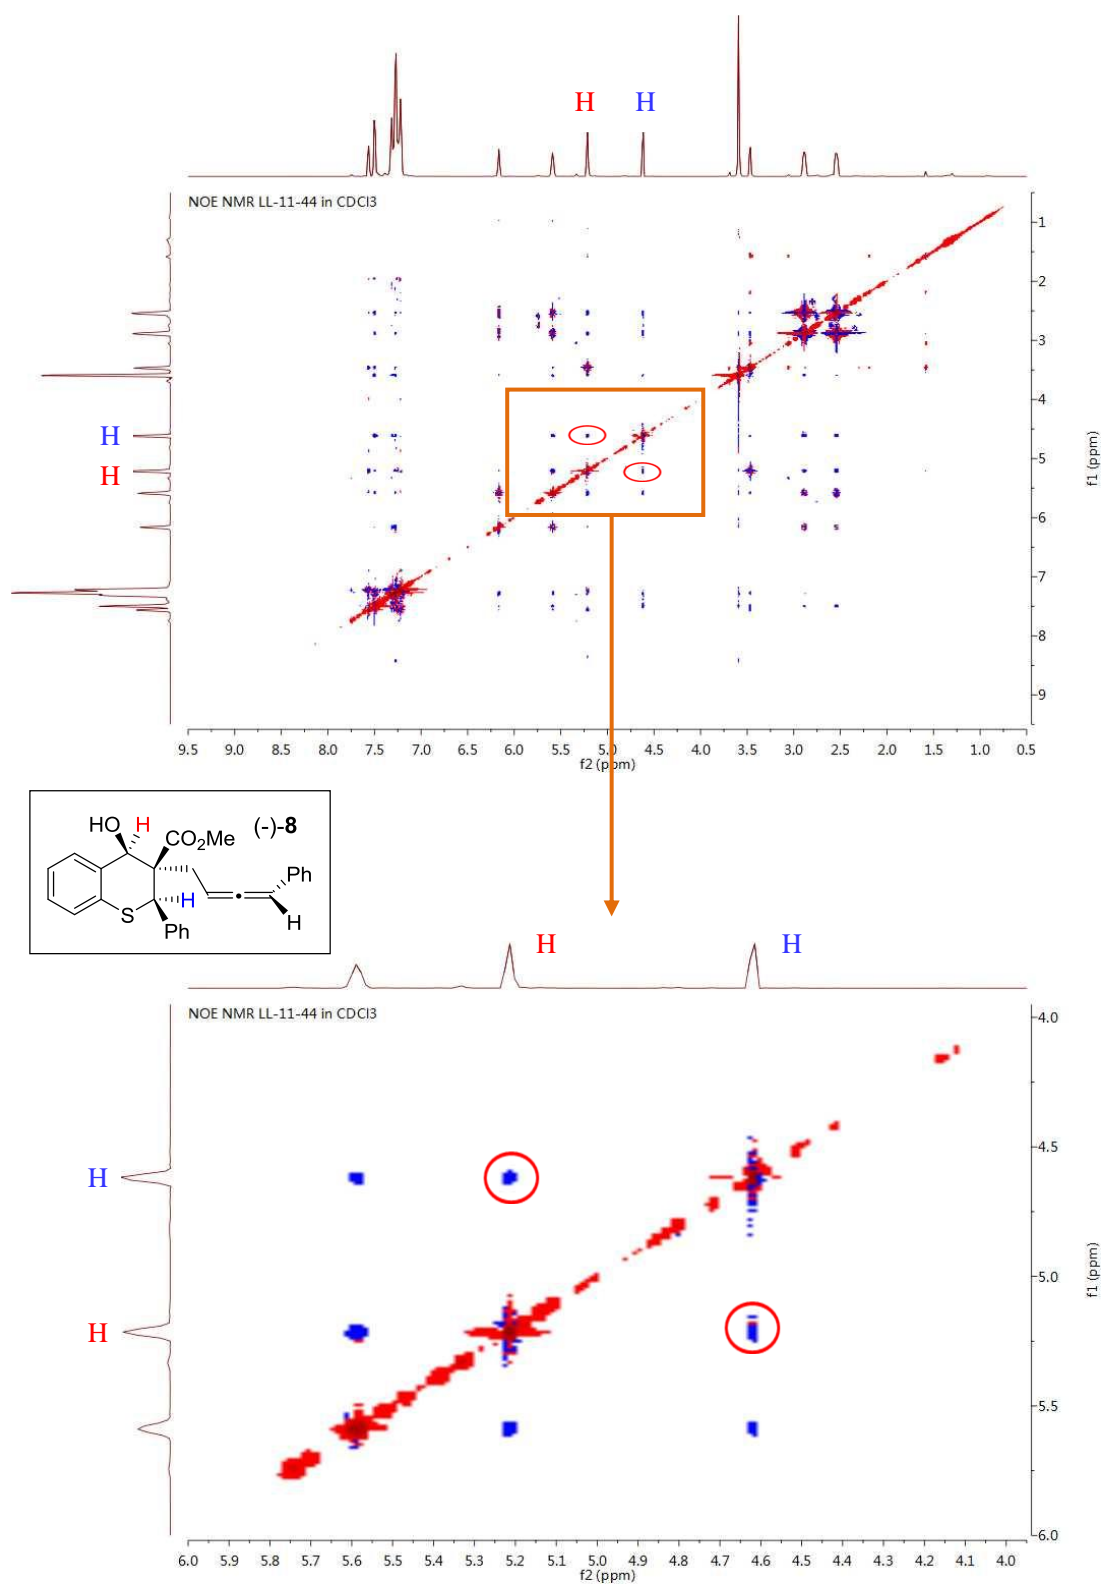

Figure S1. NOE spectrum of (-)-8

## 6. Determination of Absolute Configuration

To determine the absolute configuration of (-)-methyl 3-(4-(naphthalen-2-yl)buta-2,3 -dien-1-yl)-6-nitro-4-oxo-2-phenylthiochromane-3-carboxylate (**3mk**, 32.3:1 dr, >99% ee): (-)-**3mk** was completely dissolved in dichloromethane (2.0 mL), and *n*-hexane (2.0 mL) was added slowly at room temperature. The solvent diffused slowly, and the single crystal was obtained after about 36 hours. The structure in **Figure S2** showed the absolute configuration is (2*R*,3*S*,*R*<sub>a</sub>). The CCDC number is 2214958. These details can be obtained free of charge *via* [www.ccdc.com.ac.uk/data\\_request/cif](http://www.ccdc.com.ac.uk/data_request/cif) from the Cambridge Crystallographic Data Centre.

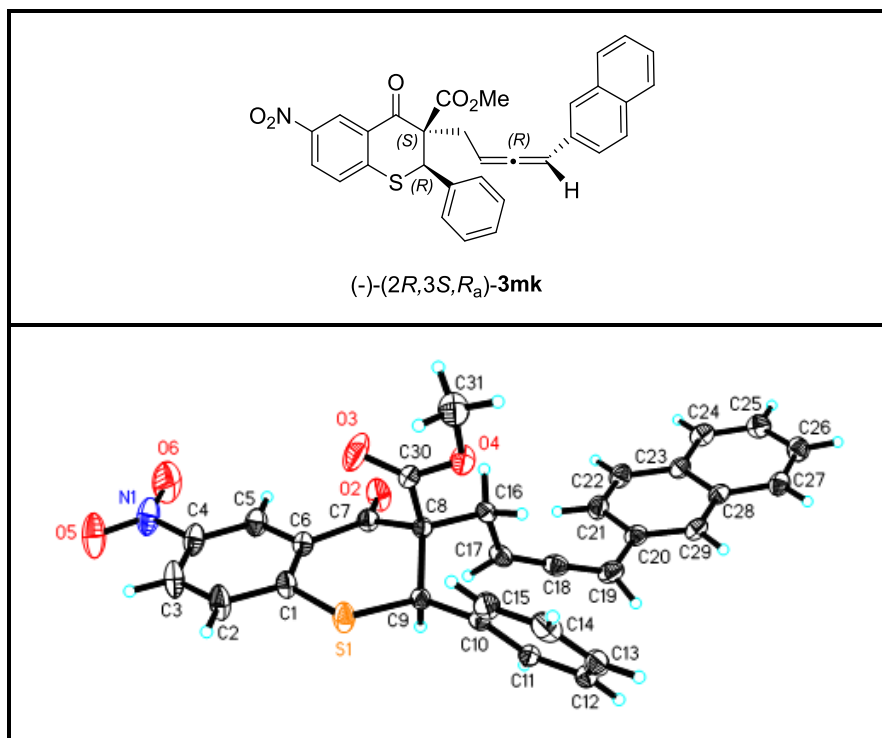

**Figure S2.** X-Ray Structure of (-)-(2*R*,3*S*,*R*<sub>a</sub>)-**3mk**

### Crystal Data and Structure Refinement for mo\_d8v22443\_0m for (-)-(2*R*,3*S*,*R*<sub>a</sub>)-3mk

|                                 |                                                   |         |
|---------------------------------|---------------------------------------------------|---------|
| Identification code             | mo_d8v22443_0m                                    |         |
| Empirical formula               | C <sub>31</sub> H <sub>23</sub> NO <sub>5</sub> S |         |
| Formula weight                  | 521.56                                            |         |
| Temperature                     | 213(2) K                                          |         |
| Wavelength                      | 0.71073 Å                                         |         |
| Crystal system                  | Orthorhombic                                      |         |
| Space group                     | P 21 21 21                                        |         |
| Unit cell dimensions            | a = 6.8379(3) Å                                   | α = 90° |
|                                 | b = 16.3952(5) Å                                  | β = 90° |
|                                 | c = 22.7541(8) Å                                  | γ = 90° |
| Volume                          | 2550.93(16) Å <sup>3</sup>                        |         |
| Z                               | 4                                                 |         |
| Density (calculated)            | 1.358 Mg/m <sup>3</sup>                           |         |
| Absorption coefficient          | 0.170 mm <sup>-1</sup>                            |         |
| F(000)                          | 1088                                              |         |
| Crystal size                    | 0.200 x 0.150 x 0.120 mm <sup>3</sup>             |         |
| Theta range for data collection | 2.641 to 25.997°                                  |         |
| Index ranges                    | -8<=h<=8, -20<=k<=18, -28<=l<=28                  |         |
| Reflections collected           | 22409                                             |         |
| Independent reflections         | 5005 [R(int) = 0.0593]                            |         |
| Completeness to theta = 25.242° | 99.4 %                                            |         |
| Absorption correction           | Semi-empirical from equivalents                   |         |
| Max. and min. transmission      | 0.7456 and 0.5174                                 |         |
| Refinement method               | Full-matrix least-squares on F <sup>2</sup>       |         |
| Data / restraints / parameters  | 5005 / 0 / 344                                    |         |
| Goodness-of-fit on F2           | 1.025                                             |         |
| Final R indices [I>2sigma(I)]   | R1 = 0.0366, wR2 = 0.0887                         |         |
| R indices (all data)            | R1 = 0.0415, wR2 = 0.0925                         |         |
| Absolute structure parameter    | 0.02(4)                                           |         |
| Extinction coefficient          | n/a                                               |         |
| Largest diff. peak and hole     | 0.187 and -0.168 e.Å <sup>-3</sup>                |         |

## 7. References

1. (a) Choudhury, A. R.; Mukherjee, S. A Catalytic Michael/Horner-Wadsworth-Emmons Cascade Reaction for Enantioselective Synthesis of Thiochromenes. *Adv. Synth. Catal.* **2013**, 355, 1989-1995. (b) Kirkeby, E. K.; Roberts, A. G. Design, Synthesis and Characterization of Structurally Dynamic Cyclic *N,S*-Acetals. *Chem. Commun.*, **2020**, 56, 9118-9121. (c) Dong, X.-Q.; Fang, X.; Tao, H.-Y.; Zhou, X.; Wang, C.-J. Organocatalytic Asymmetric Domino sulfa-Michael-aldol Reactions of 2-Mercaptobenzaldehyde with  $\alpha,\beta$ -Unsaturated *N*-Acylpyrazoles for the Construction of Thiochromane. *Chem. Commun.*, **2012**, 48, 7238-7240. (d) Zhang, Y.-P.; You, Y.; Zhao, J.-Q.; Zhang, X.-M.; Xu, X.-Y.; Yuan, W.-C. Chiral Bifunctional Amine-Squaramide-Catalyzed Highly Diastereo- and Enantioselective Michael/Aldol Cascade Reaction of 2-Mercaptobenzaldehyde and  $\alpha,\beta$ -Unsaturated 7-Azaindoline Amides. *J. Org. Chem.* **2019**, 84, 7984-7994.
2. Meyer, C.; Piva, O.; Pete, J.-P. [2+2] Photocycloadditions and Photorearrangements of 2-Alkenylcarboxamido-2-cycloalken-1-ones. *Tetrahedron* **2000**, 56, 4479-4489.
3. (a) Huang, X.; Cao, T.; Han, Y.; Jiang, X.; Lin, W.; Zhang, J.; Ma, S. General  $\text{CuBr}_2$ -Catalyzed Highly Enantioselective Approach for Optically Active Allenols from Terminal Alkynols. *Chem. Commun.*, **2015**, 51, 6956-6959. (b) Song, S.; Ma, S. Highly Selective Nucleophilic 4-Aryl-2,3-allenylation of Malonates. *Chin. J. Chem.* **2020**, 38, 1233-1238.
4. Chen, H.; Jia, X.; Yu, Y.; Qian, Q.; Gong, H. Nickel-Catalyzed Reductive Allylation of Tertiary Alkyl Halides with Allylic Carbonates. *Angew. Chem. Int. Ed.* **2017**, 56, 13103-13106.
5. Tang, X.; Woodward, S.; Krause, N. Synthesis of  $\alpha$ -Hydroxyallenes by Copper-Catalyzed  $\text{S}_{\text{N}}2'$  Substitution of Propargylic Dioxolanones. *Eur. J. Org. Chem.* **2009**, 2836-2844.

## 8. Copy of NMR and HPLC Spectra

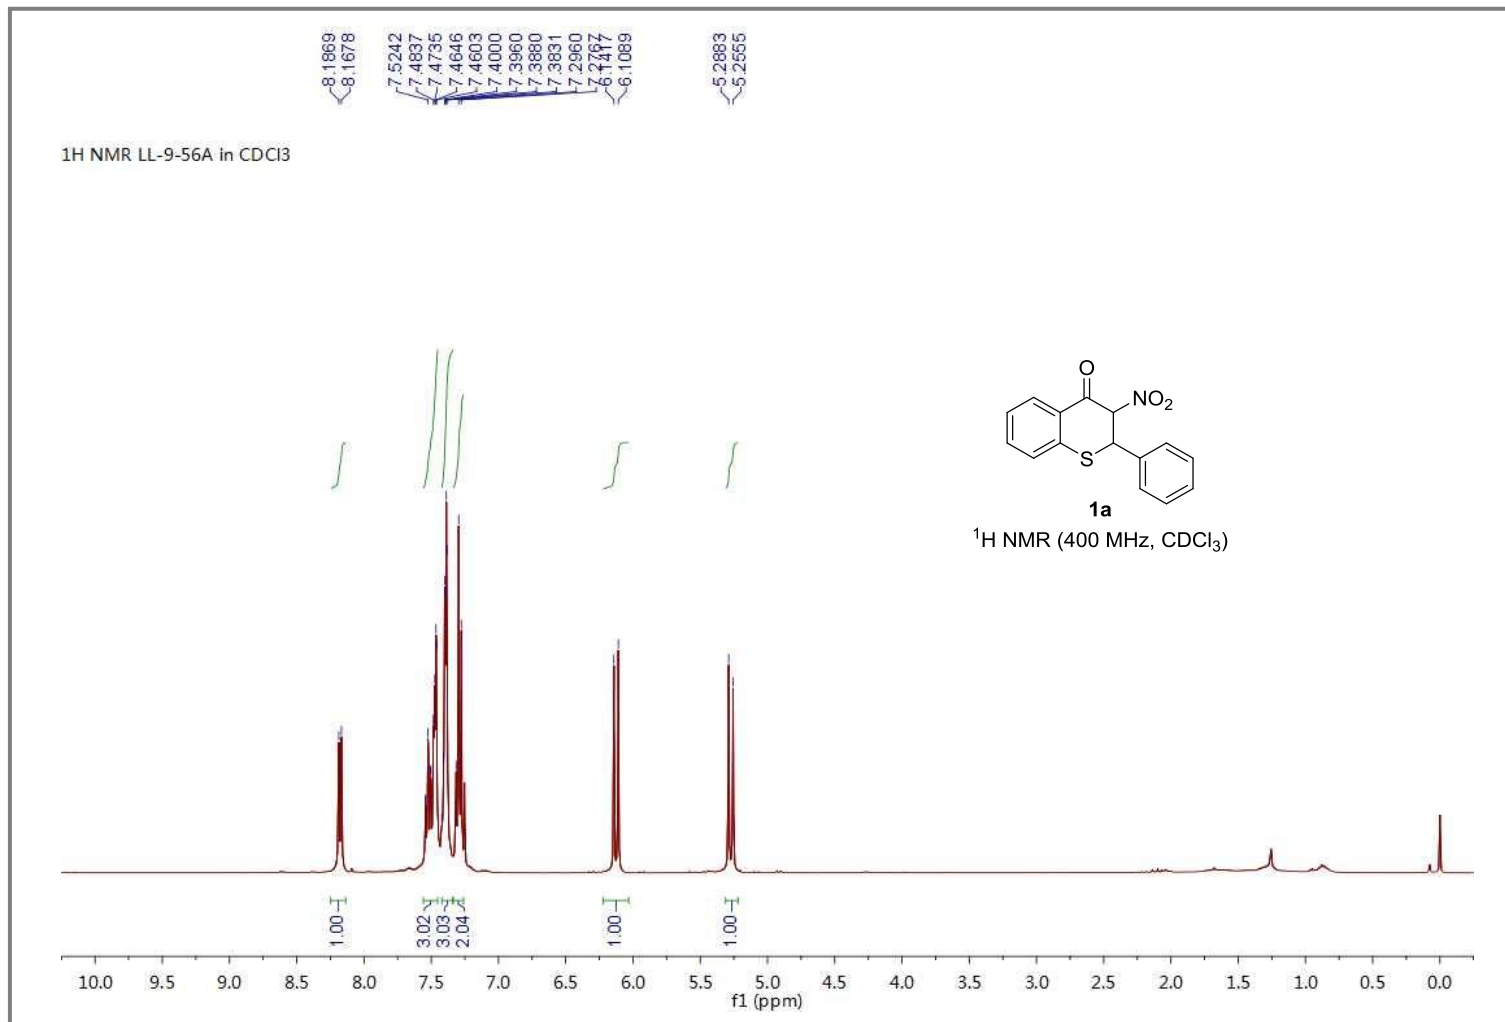

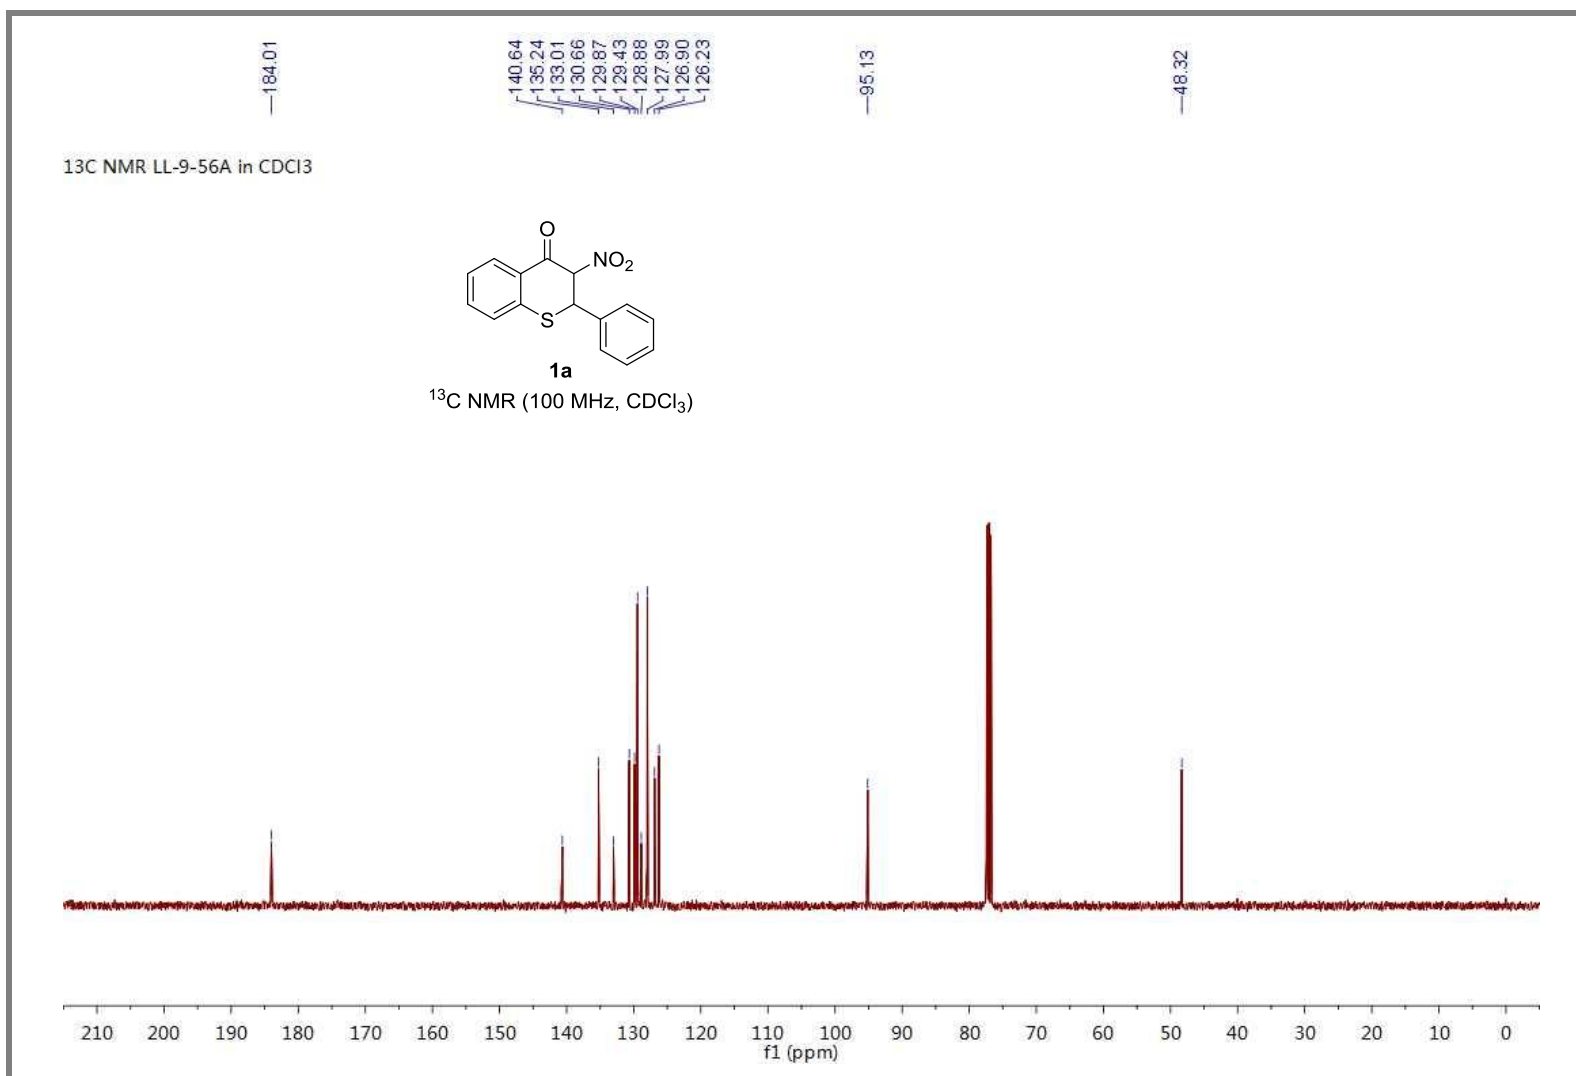



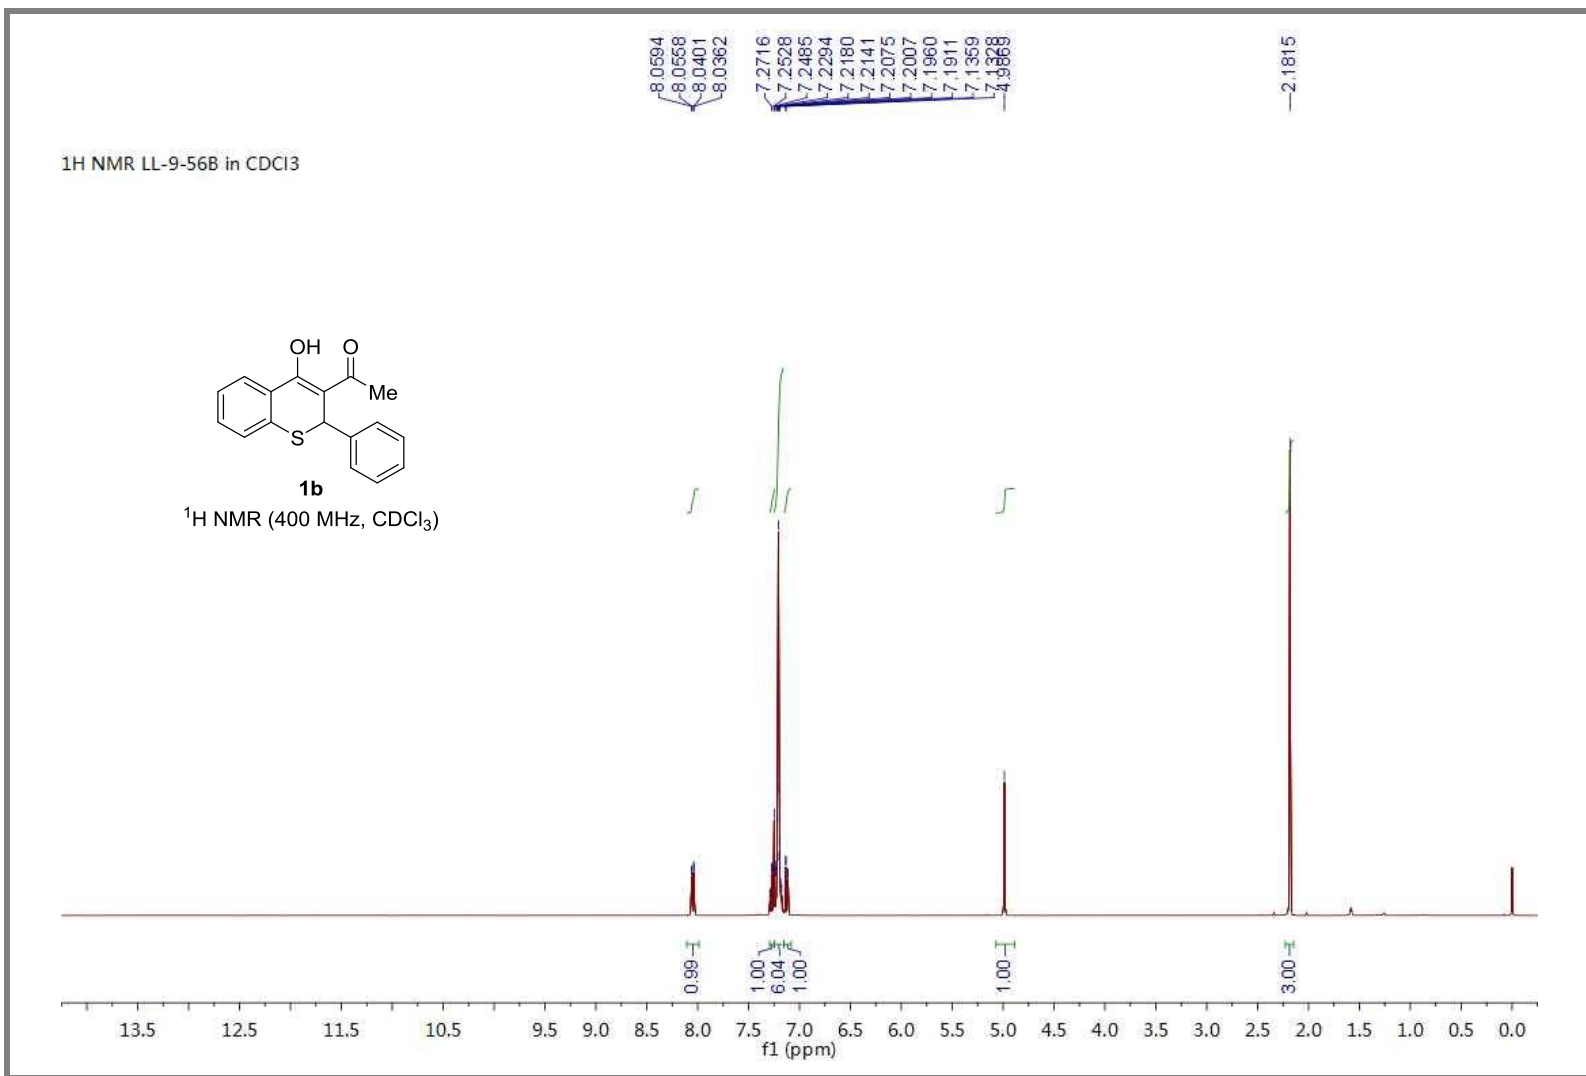

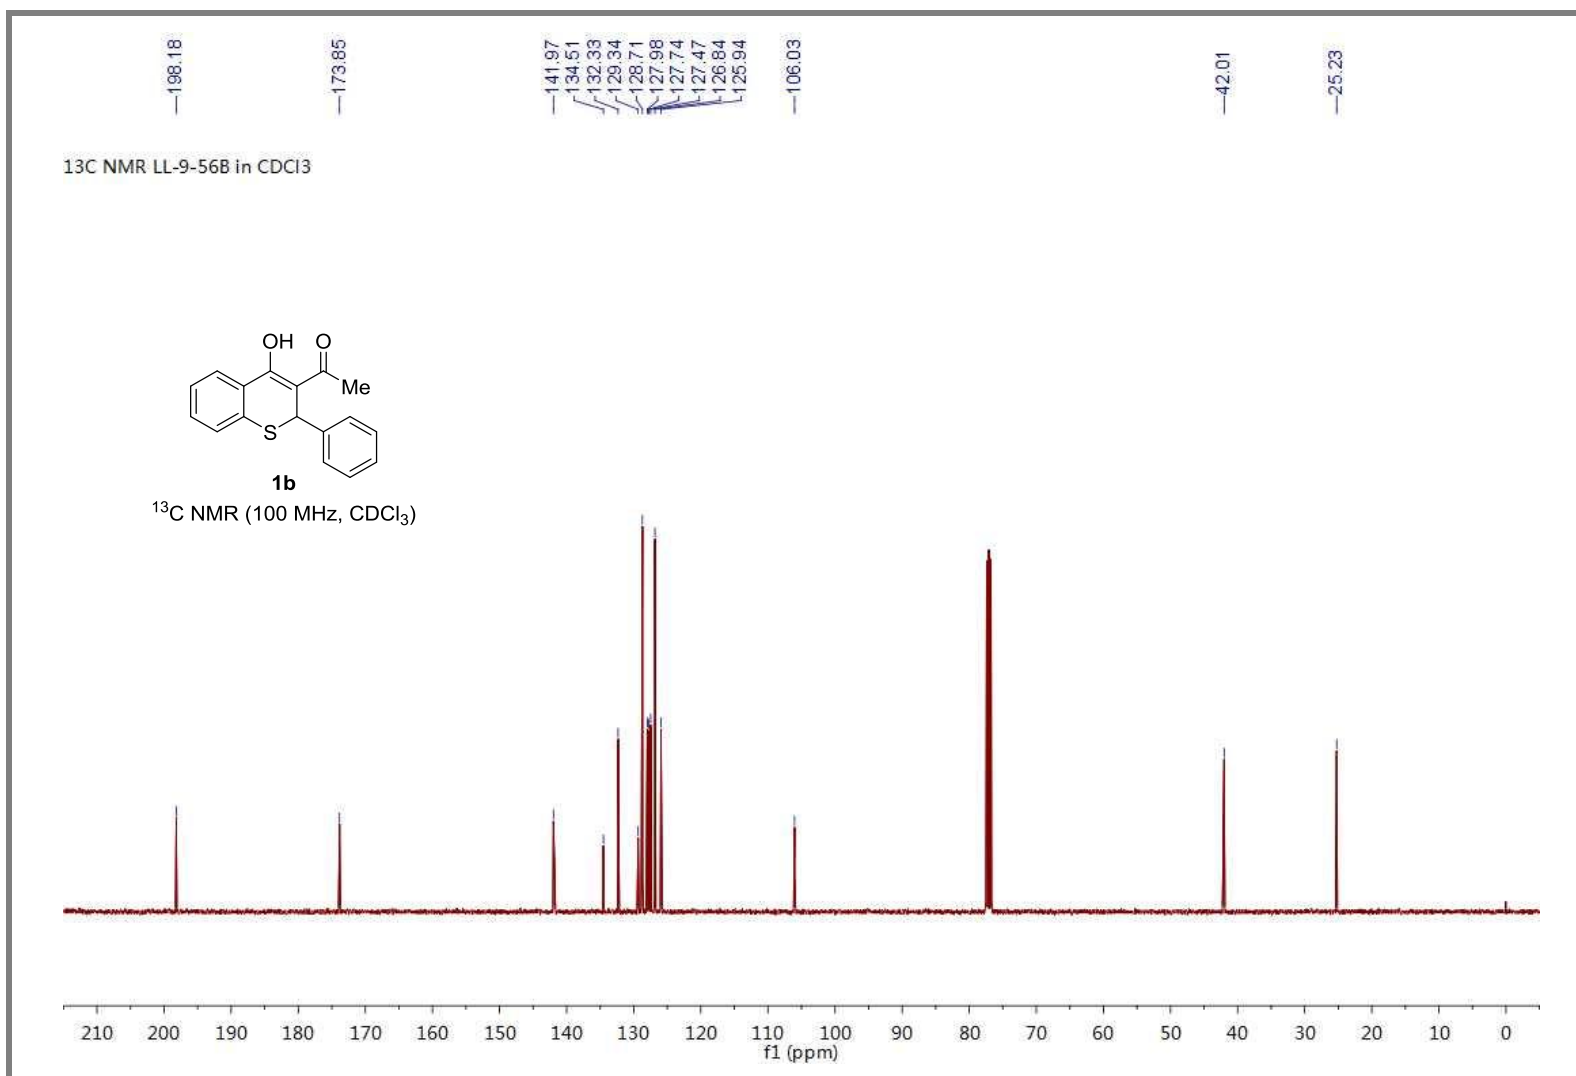

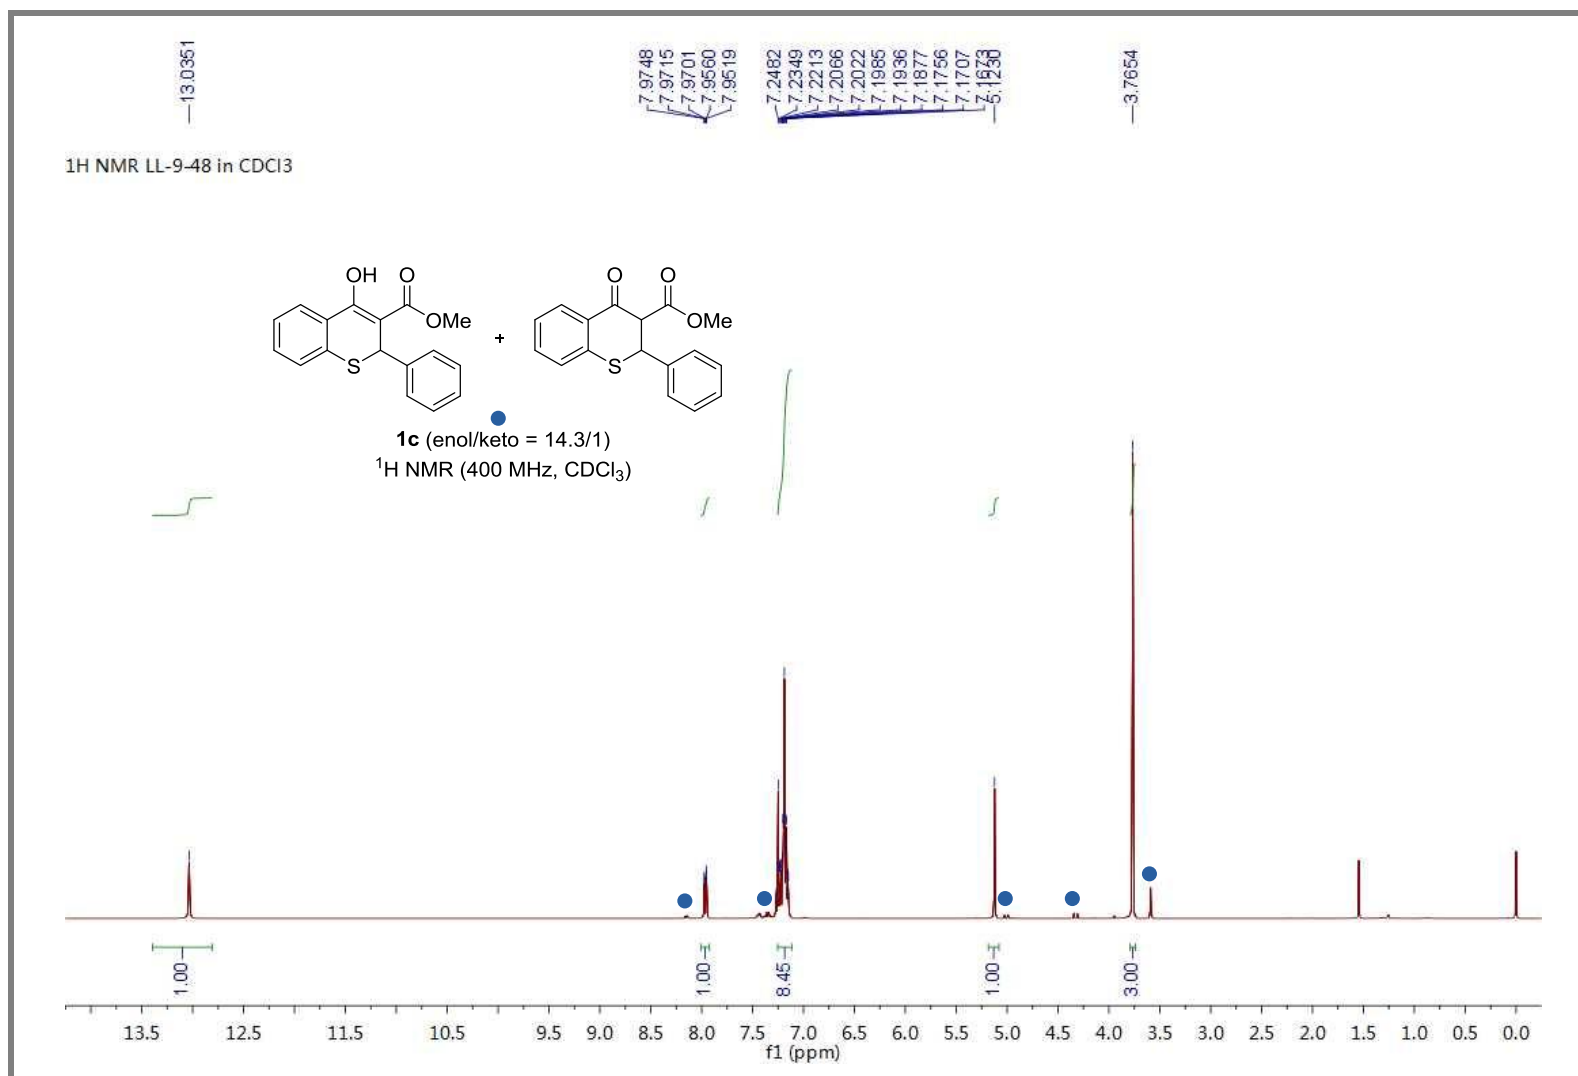

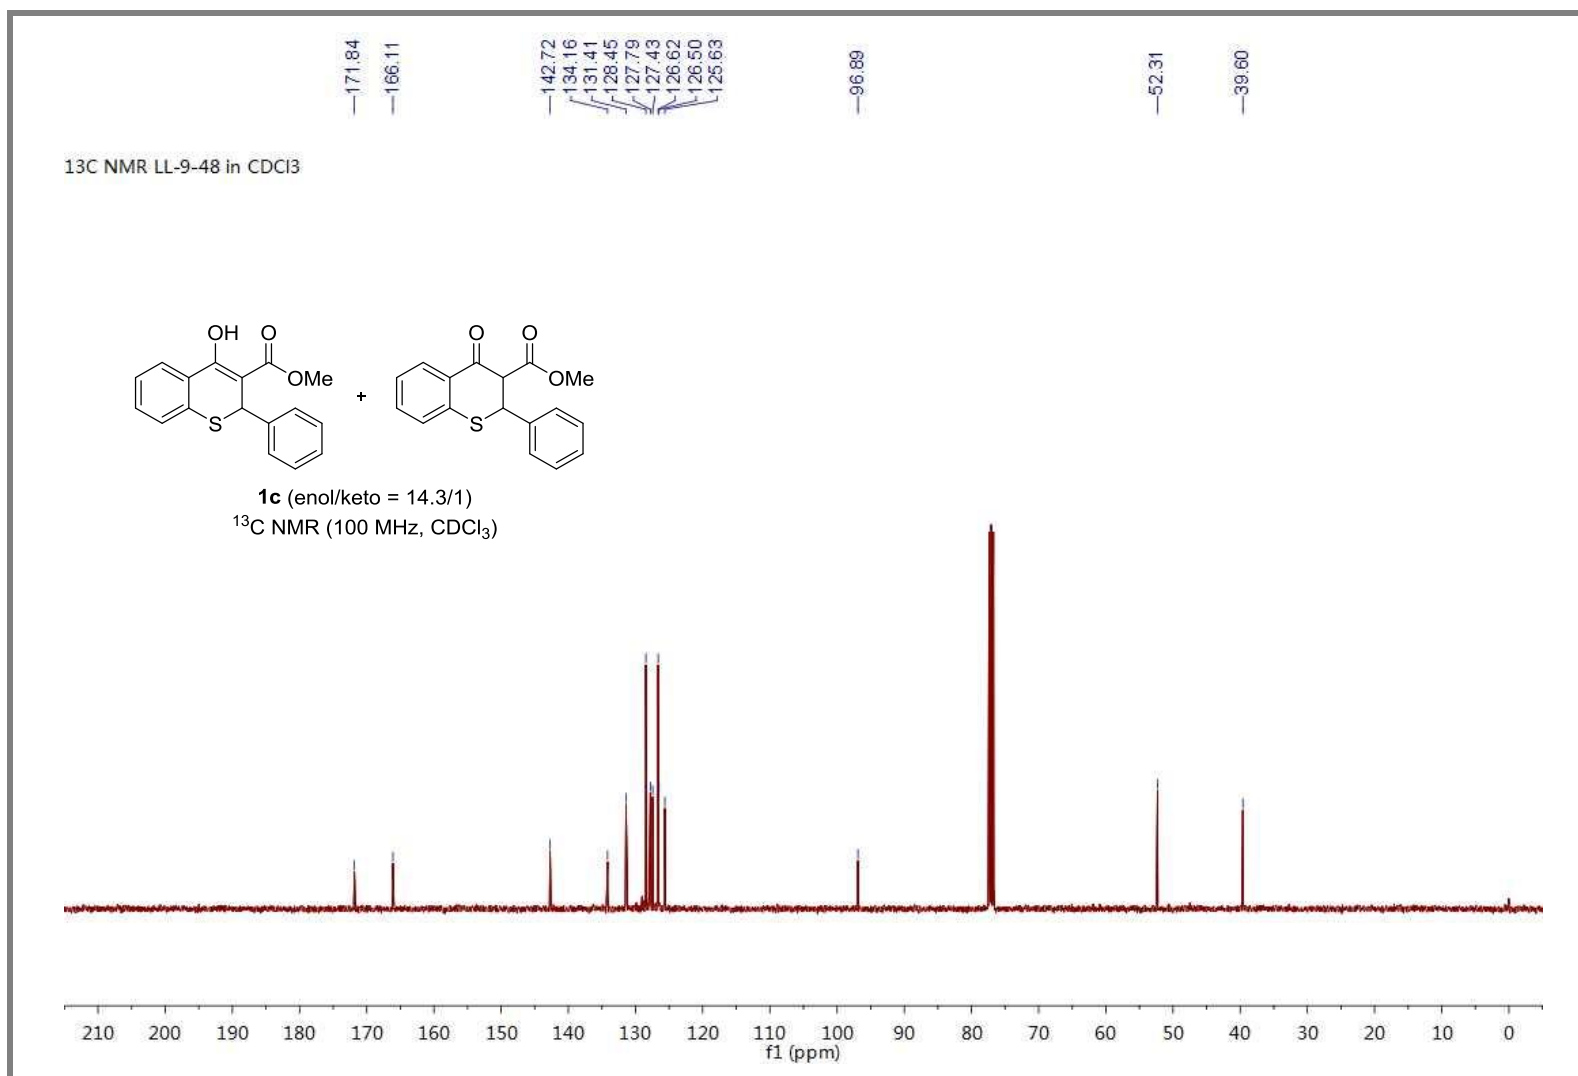

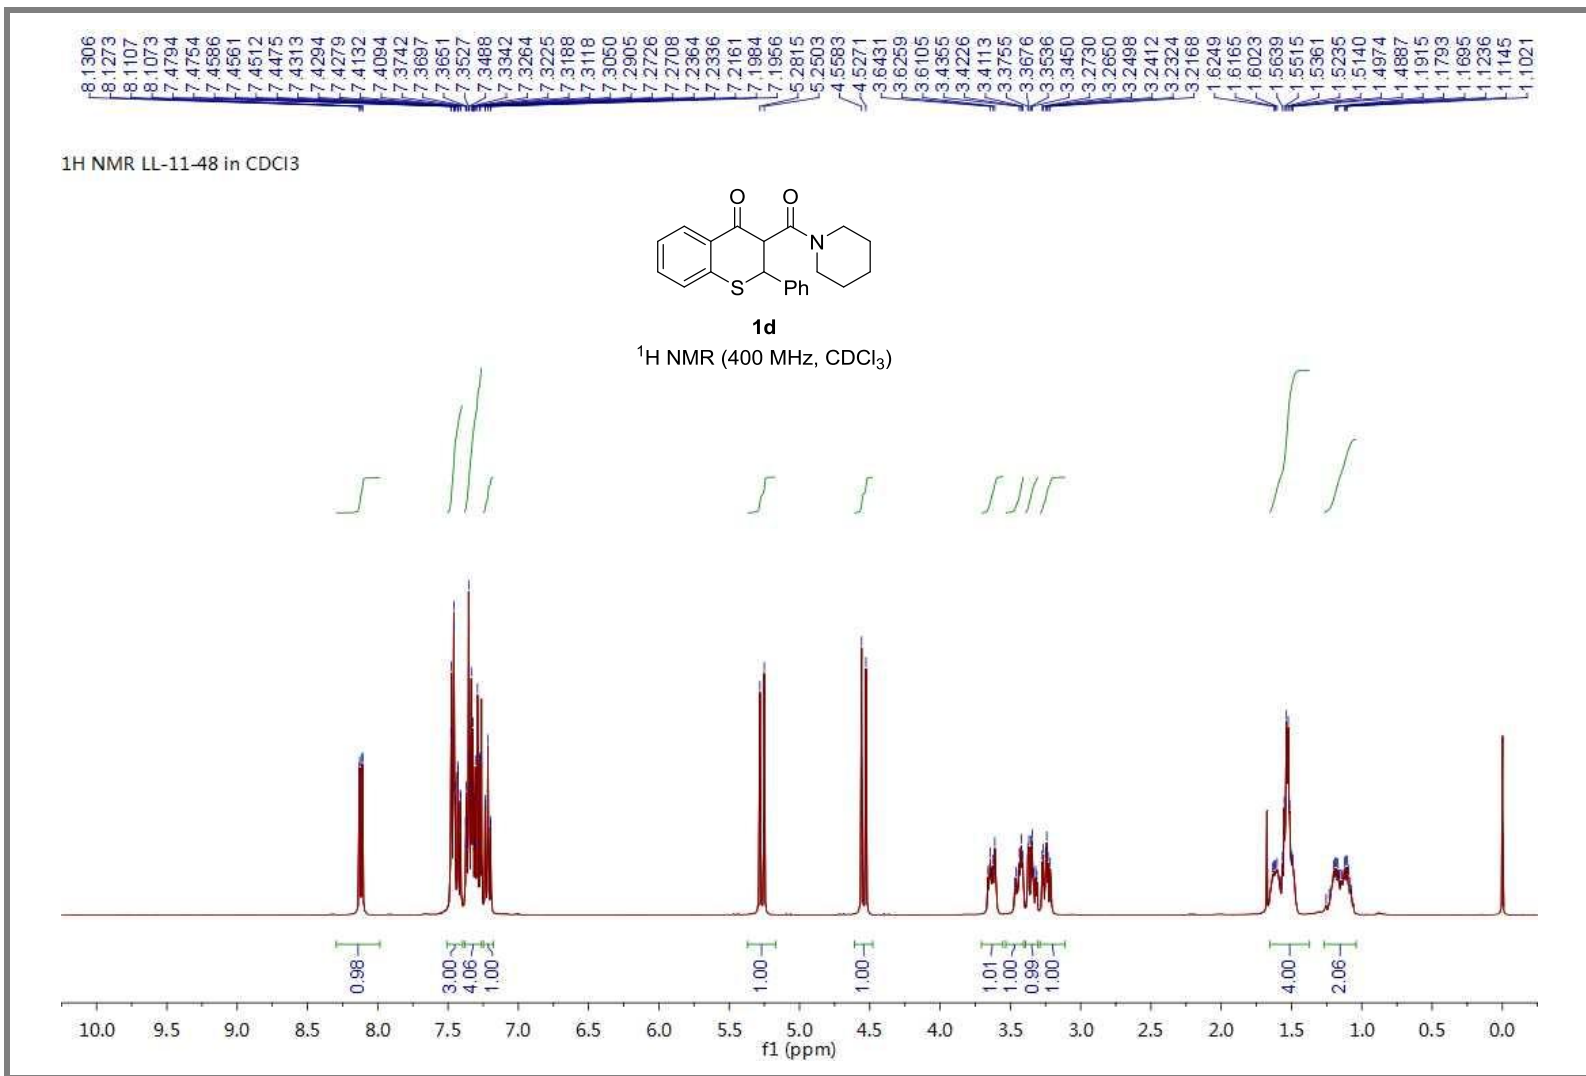

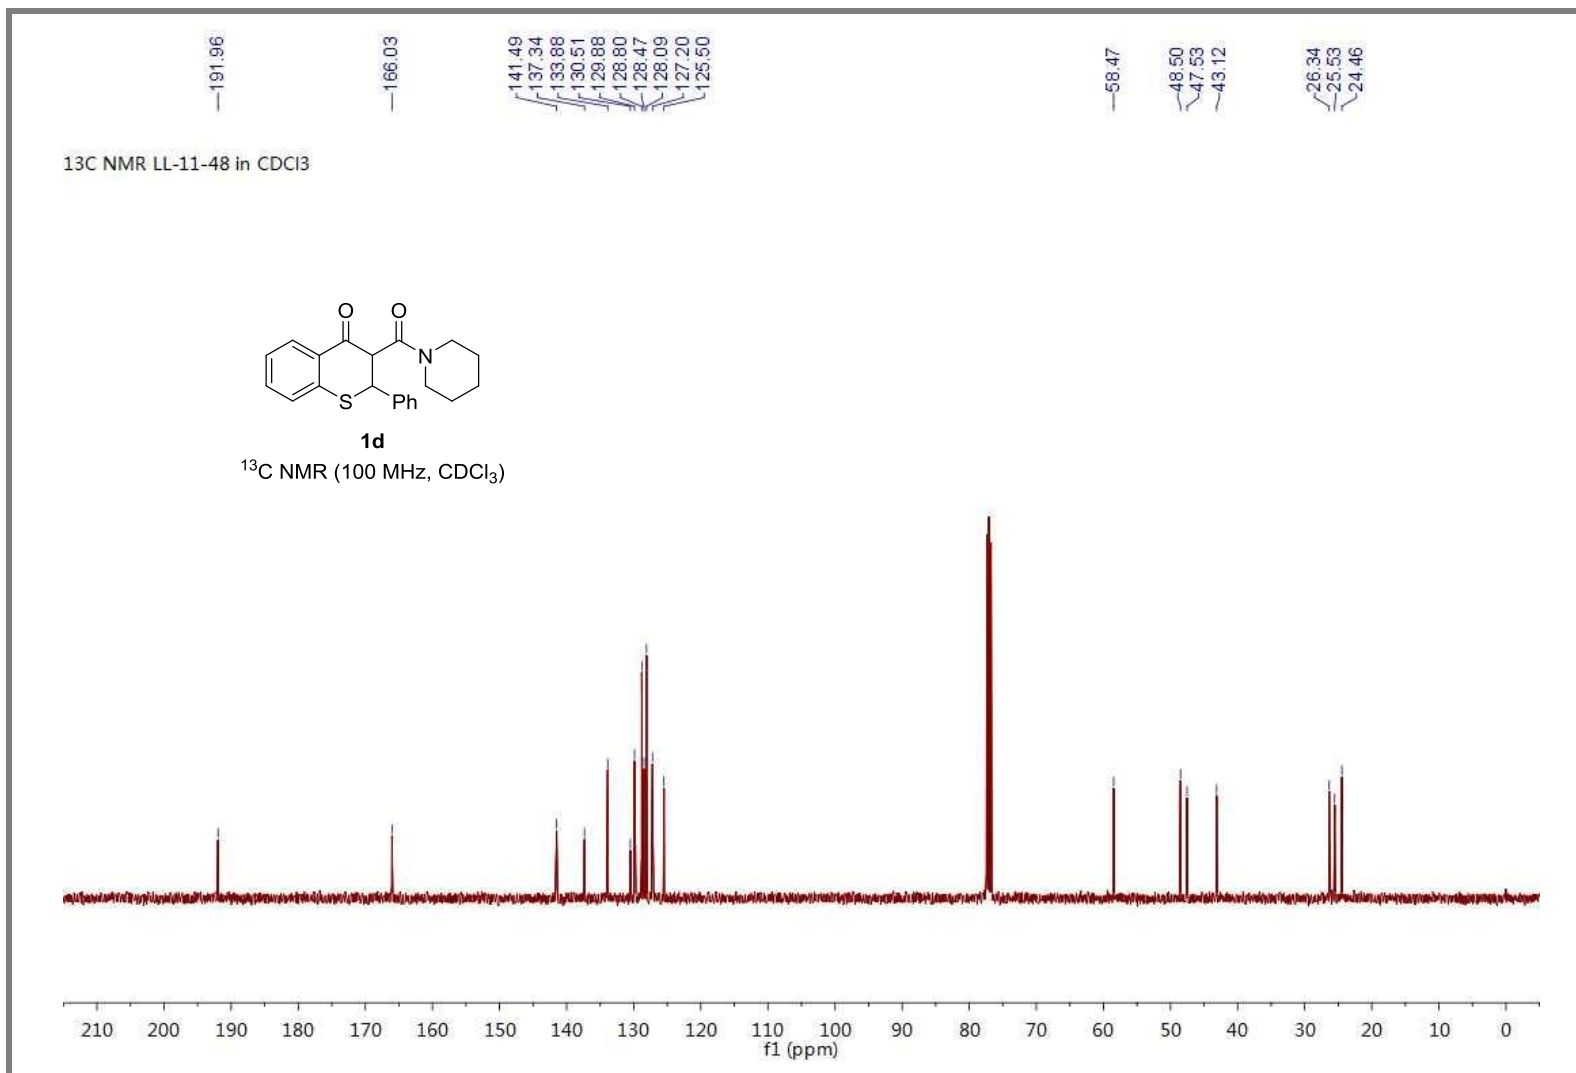

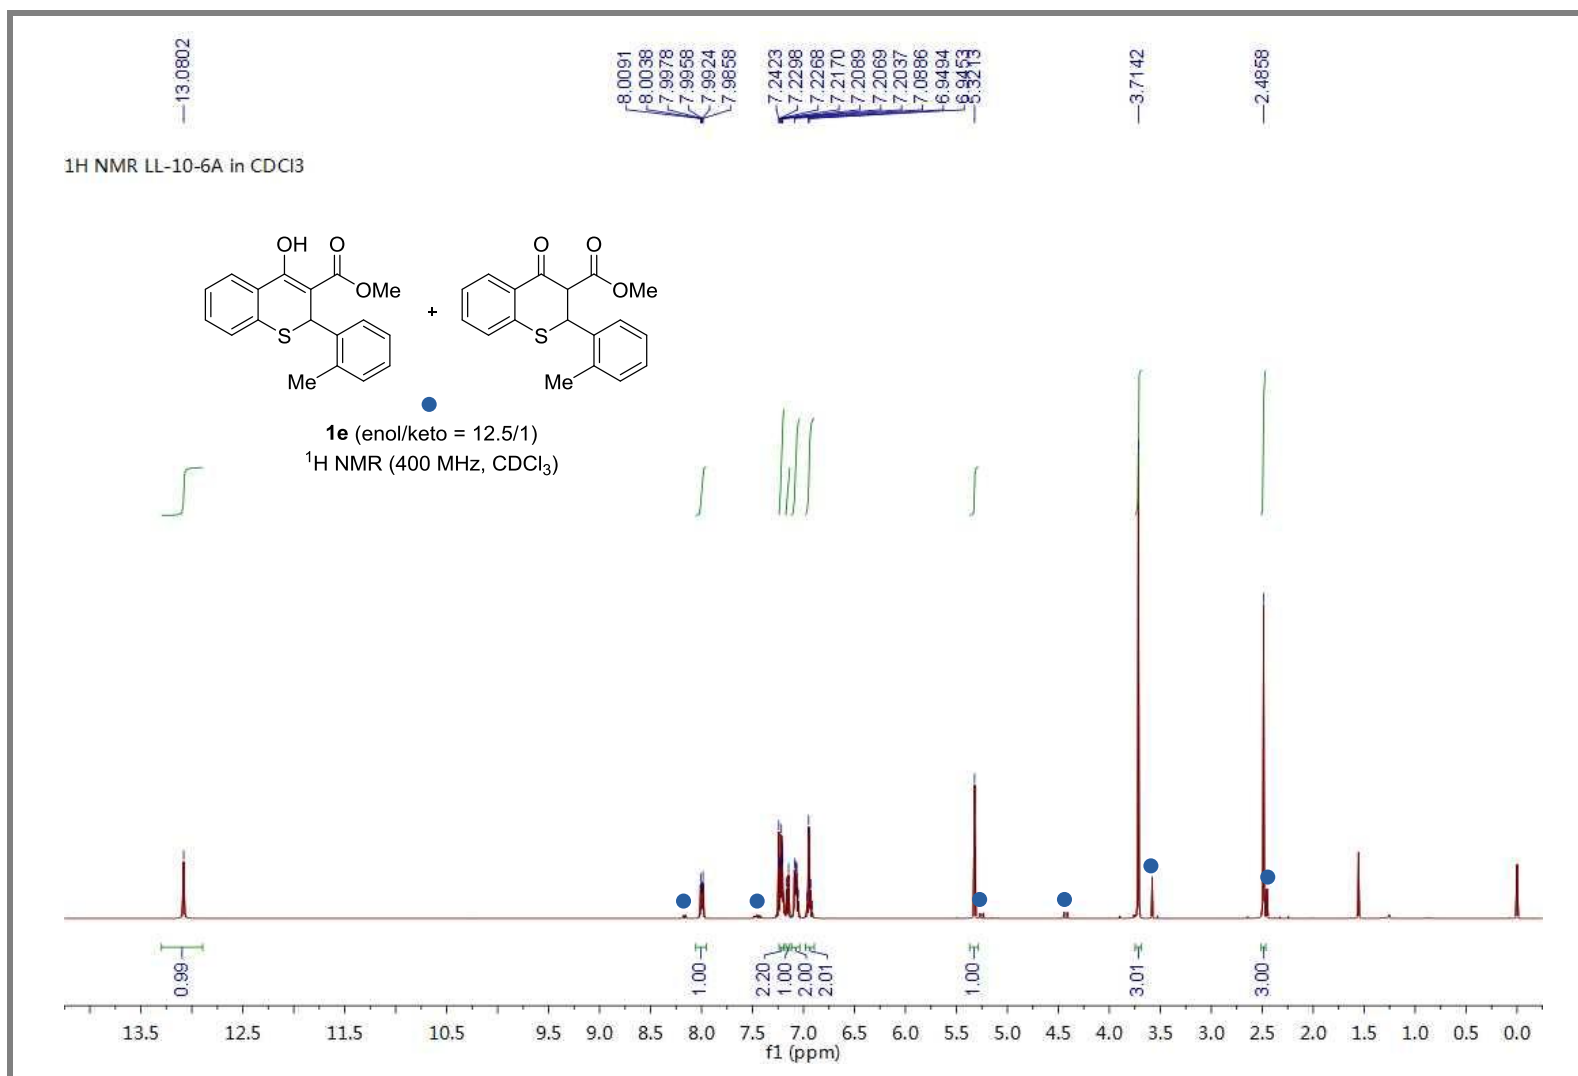

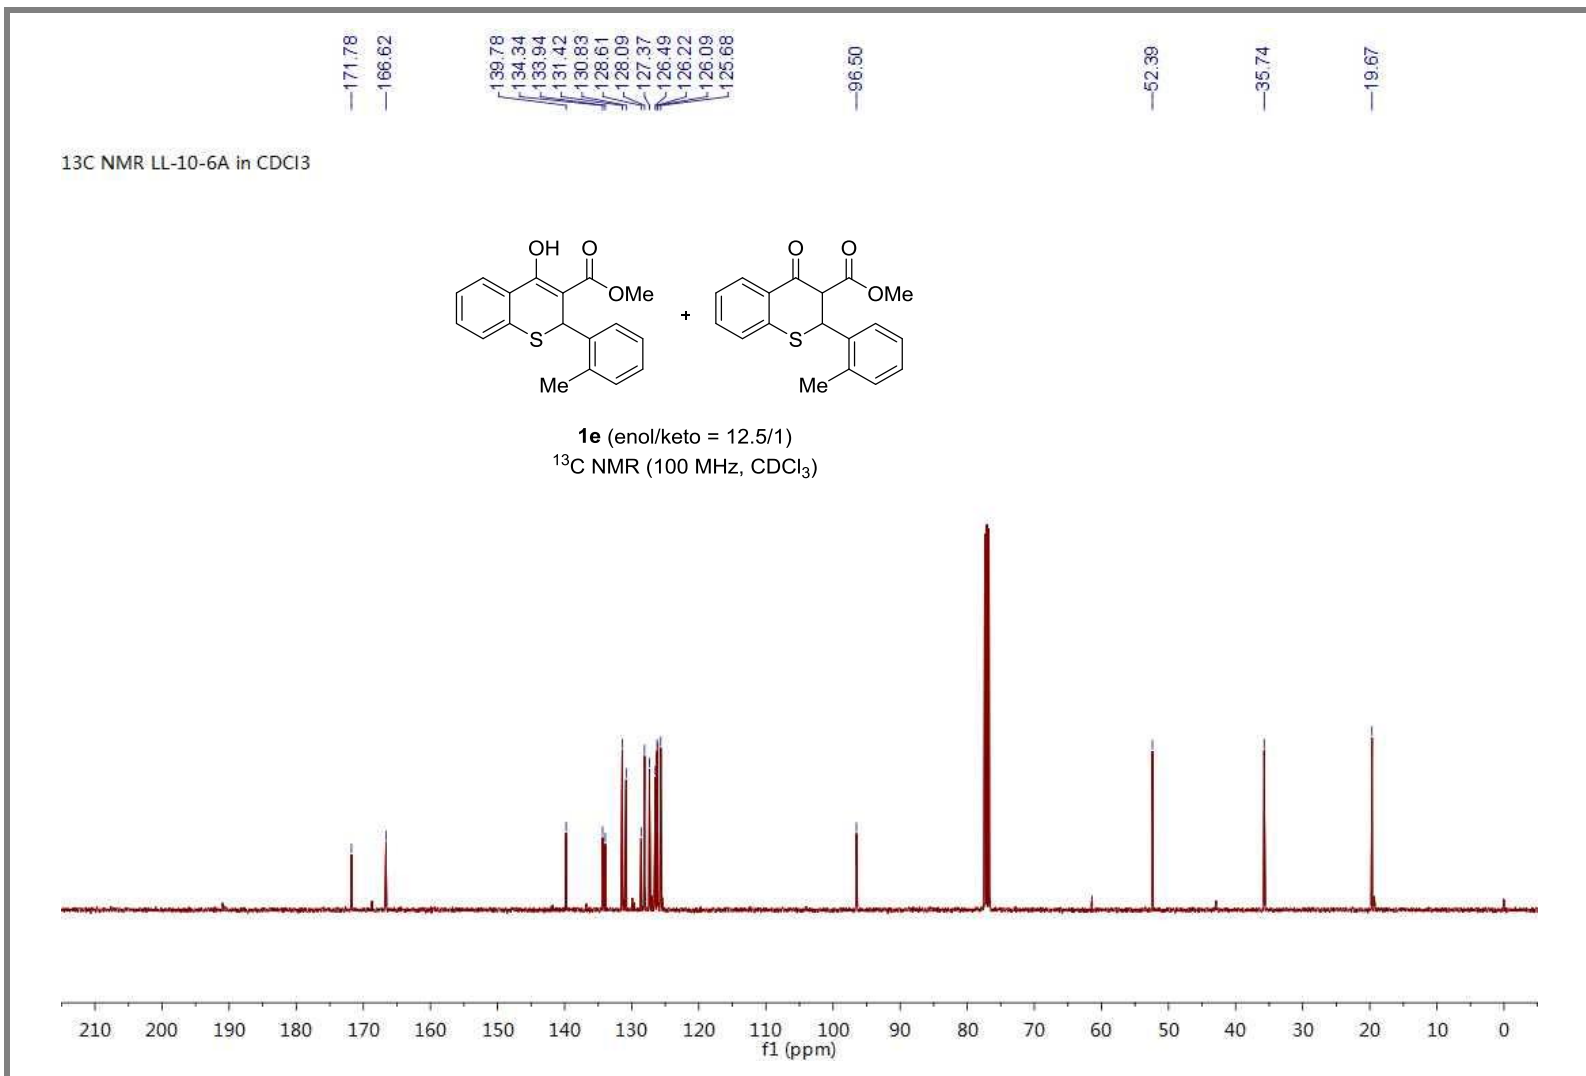



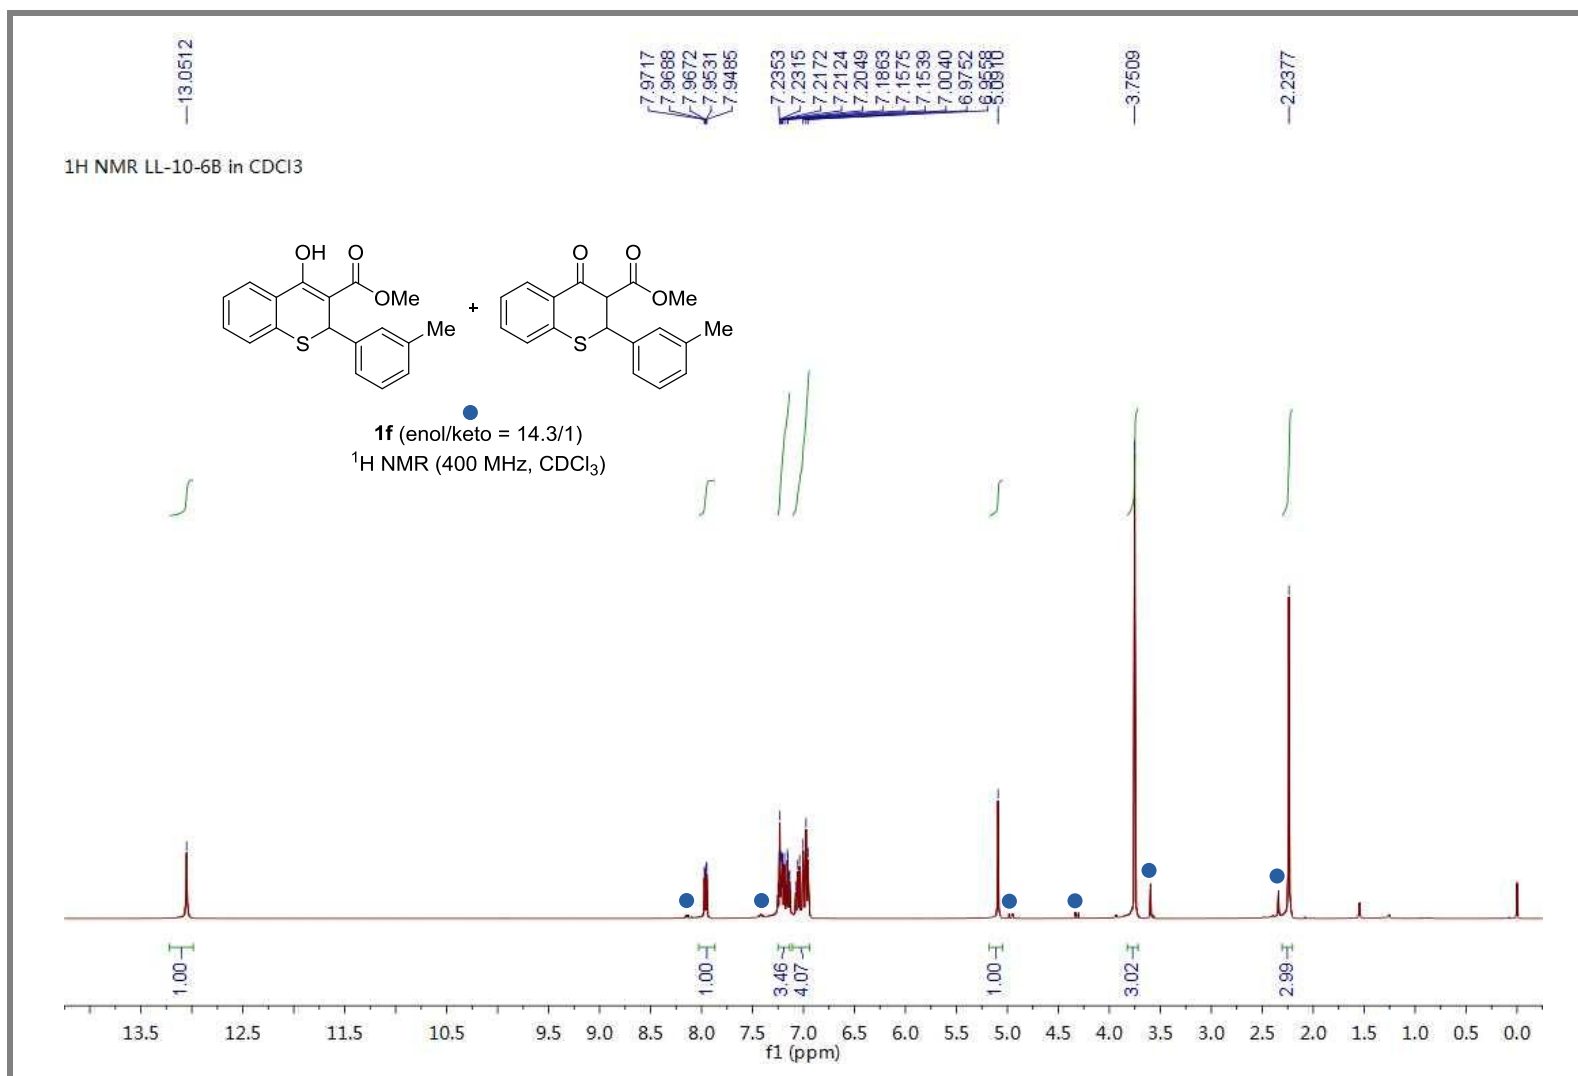

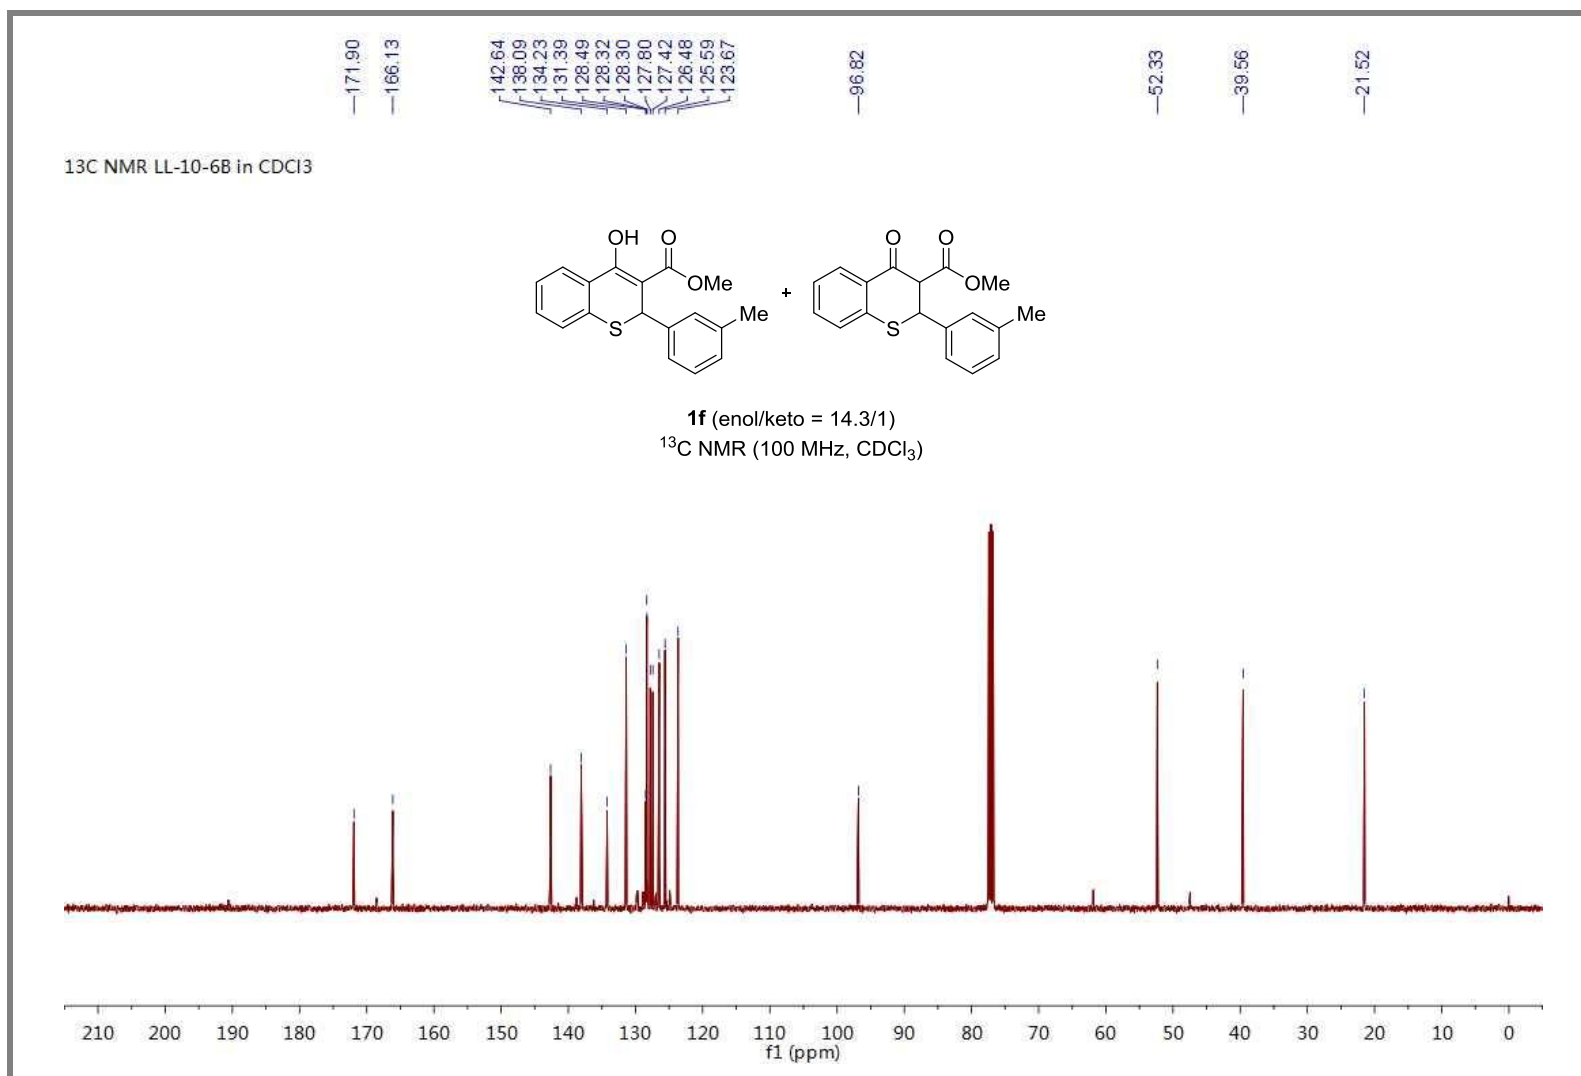

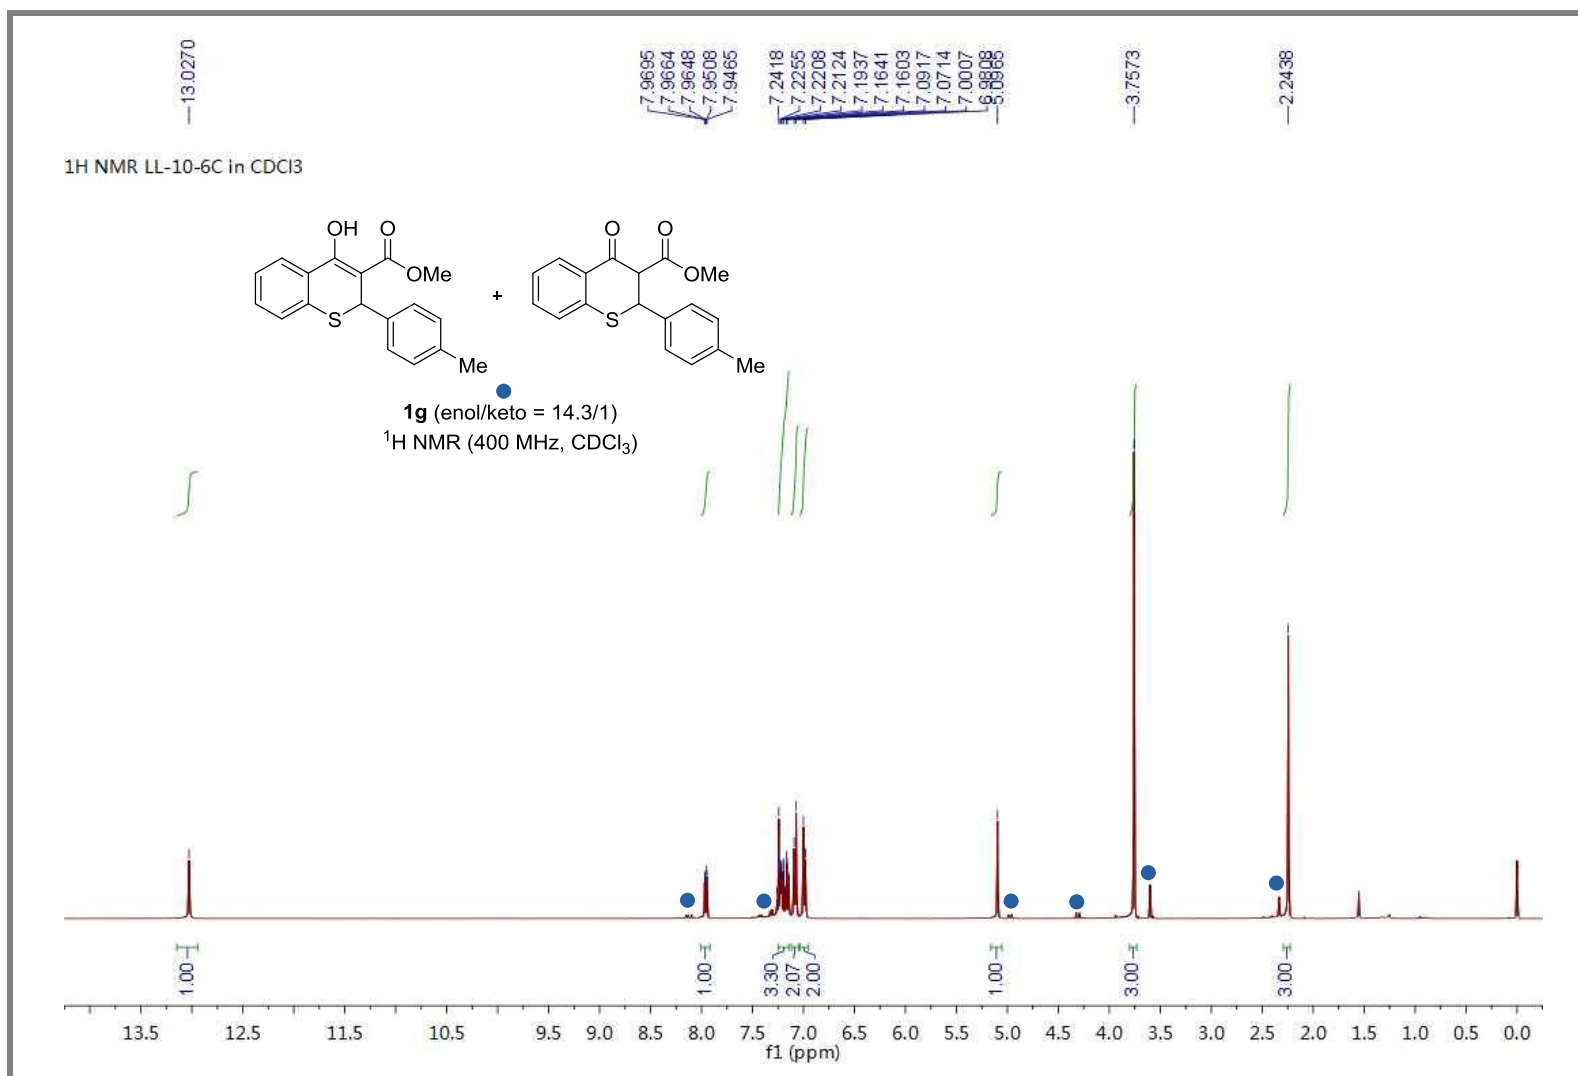

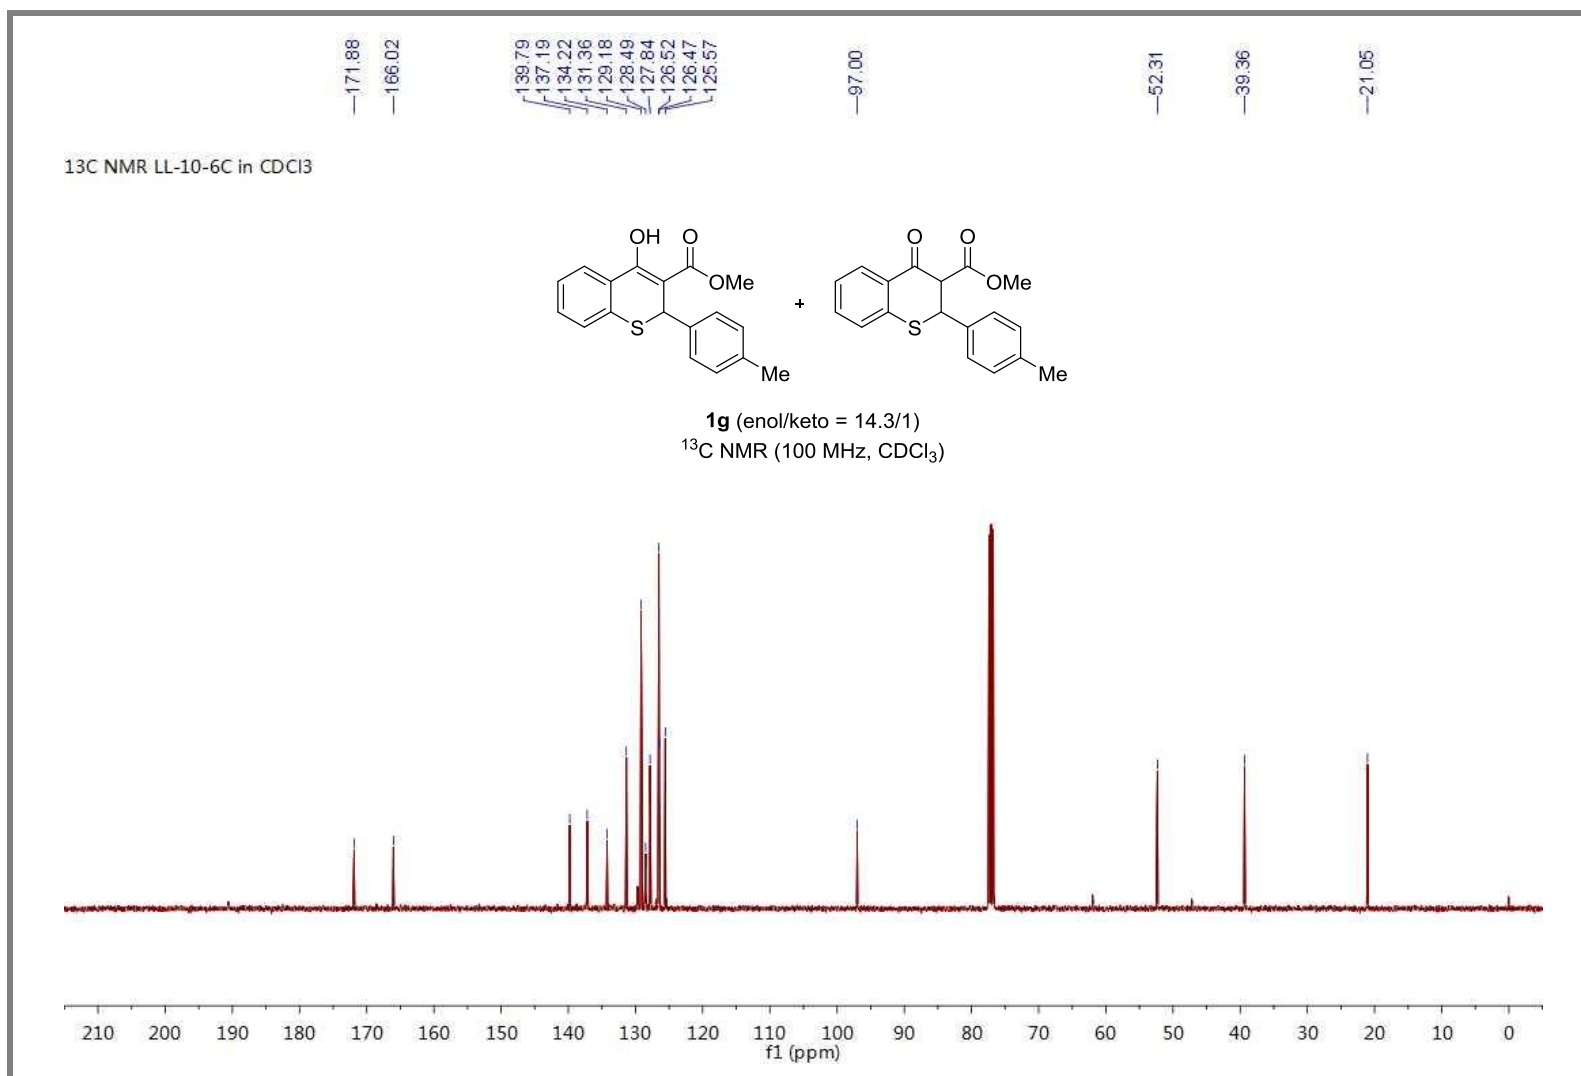

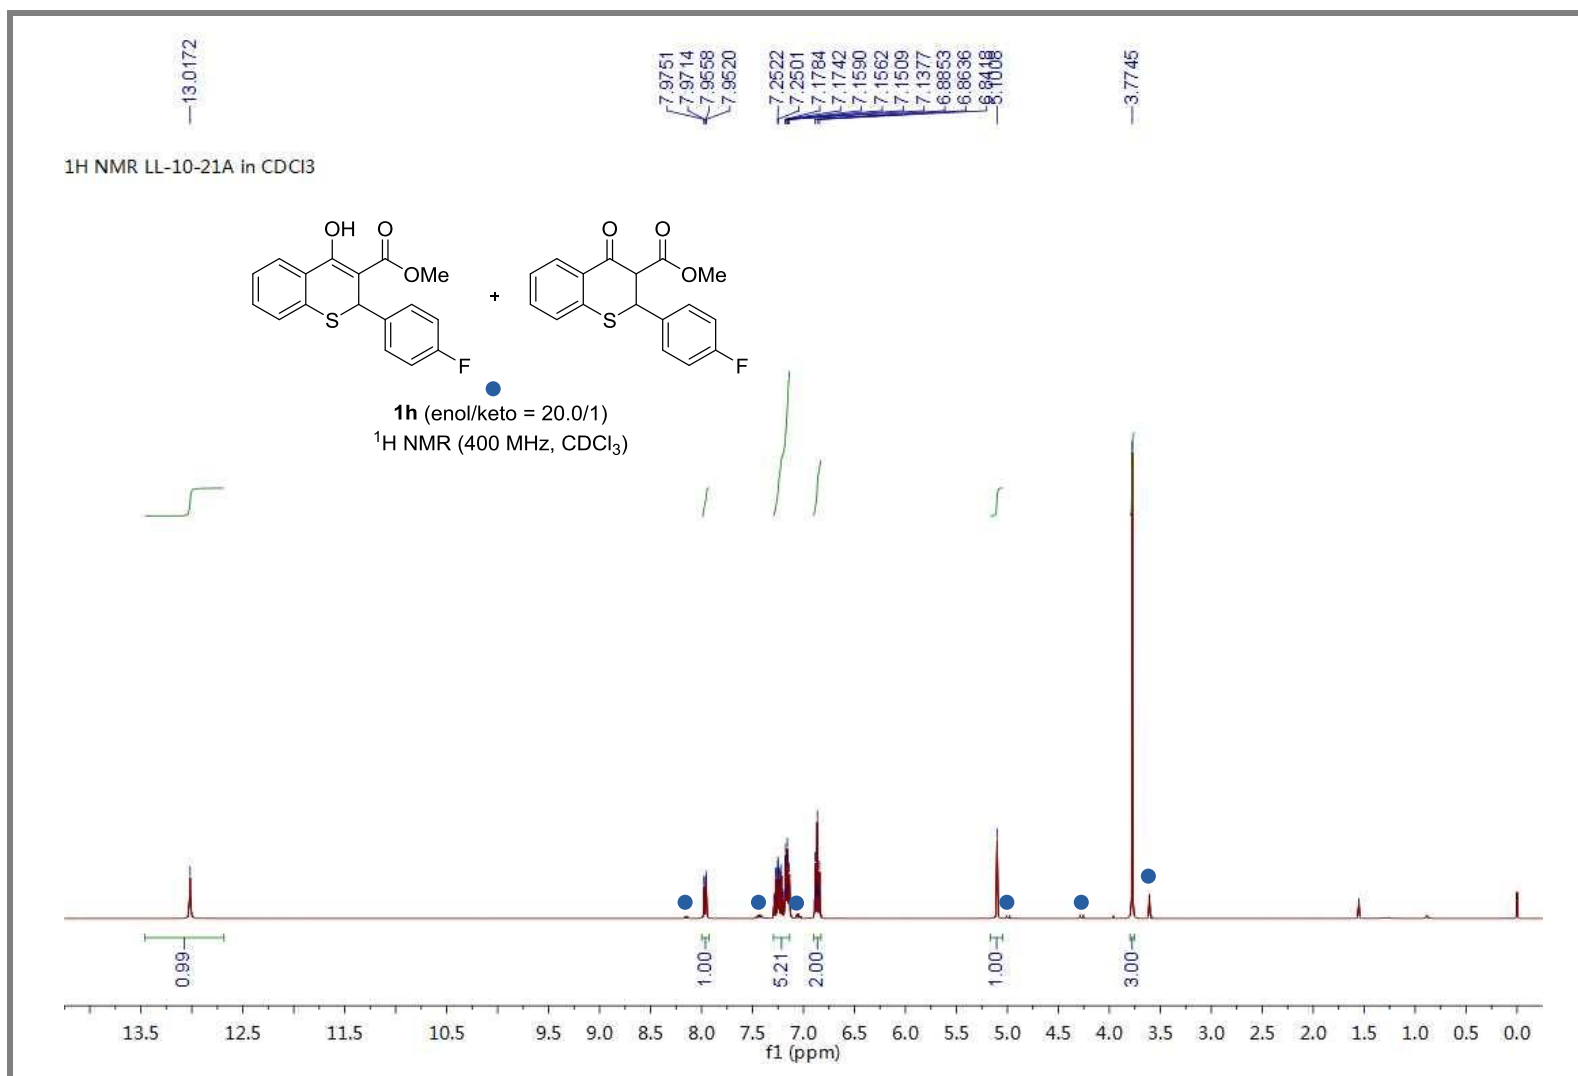

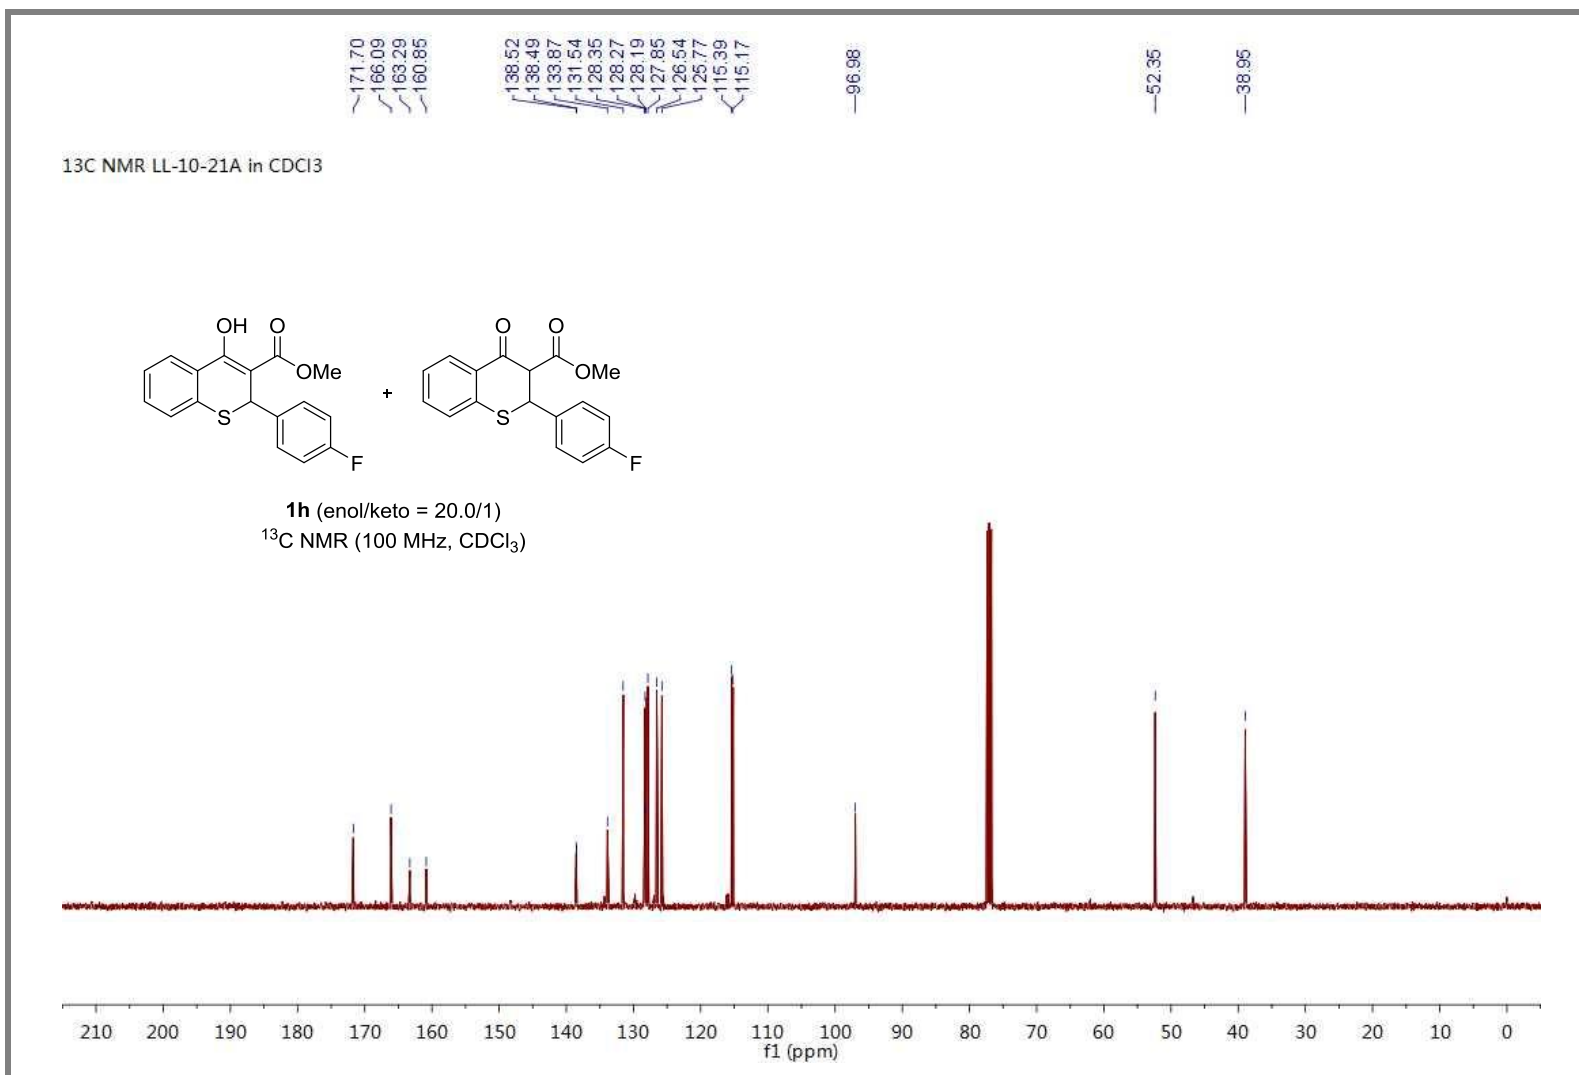

<sup>19</sup>F NMR LL-10-21A in CDCl<sub>3</sub>

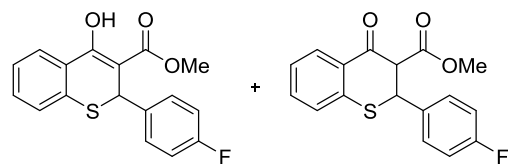

**1h** (enol/keto = 20.0/1)  
<sup>19</sup>F NMR (376 MHz, CDCl<sub>3</sub>)

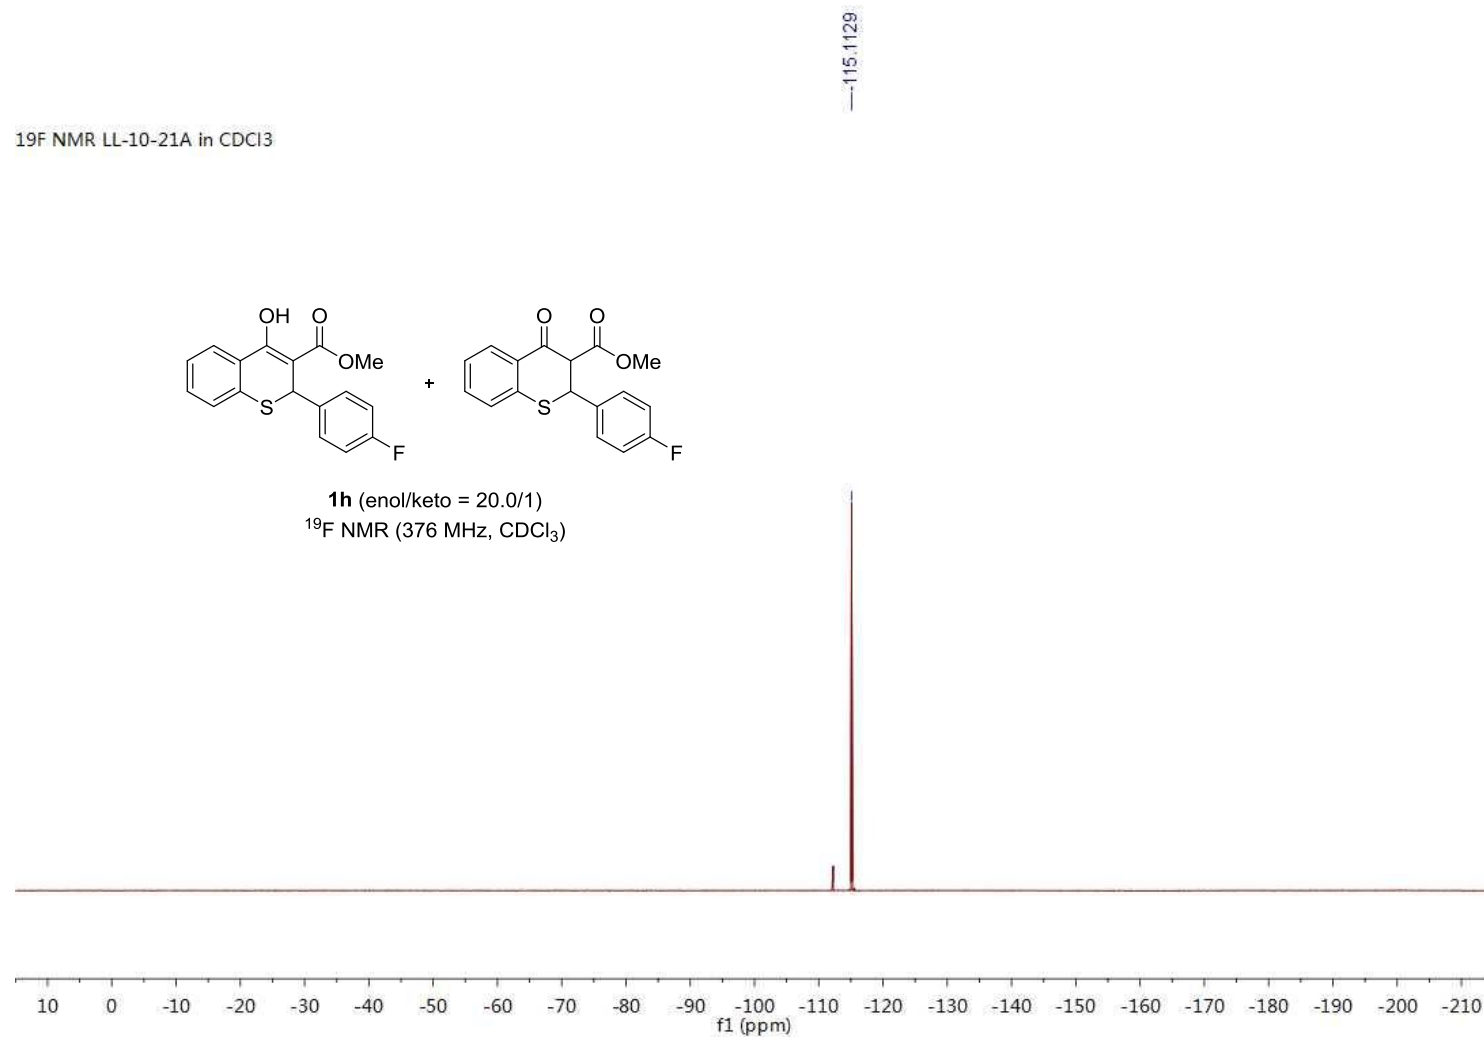

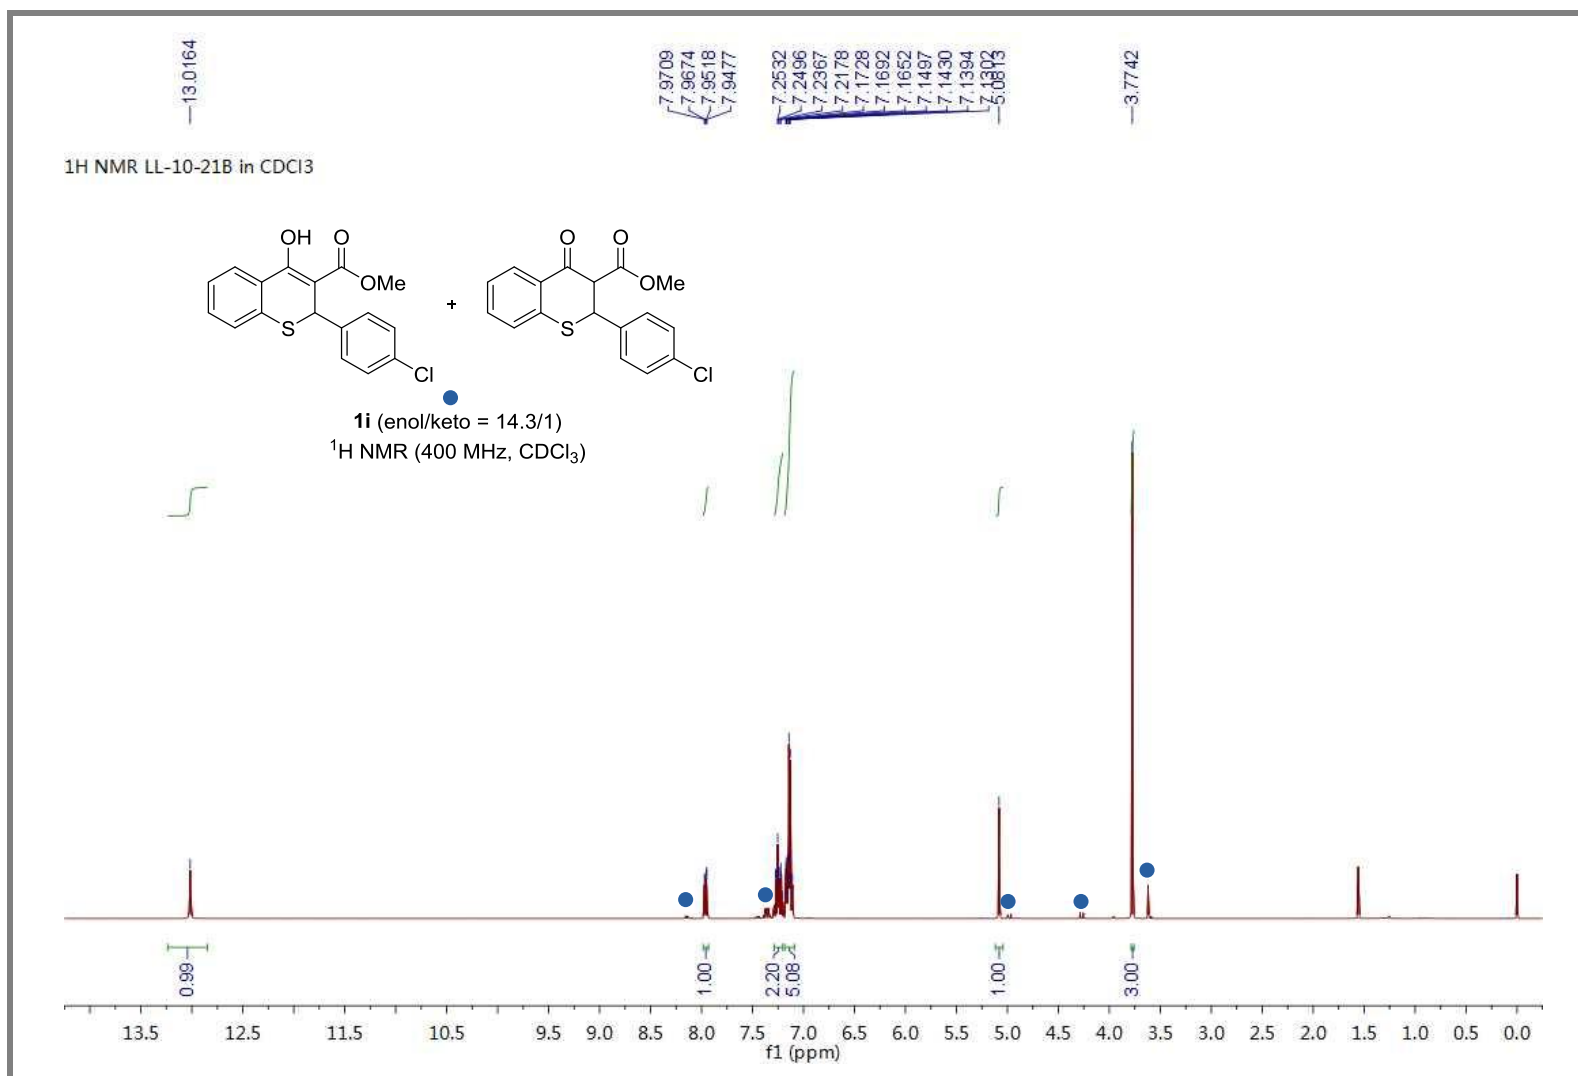



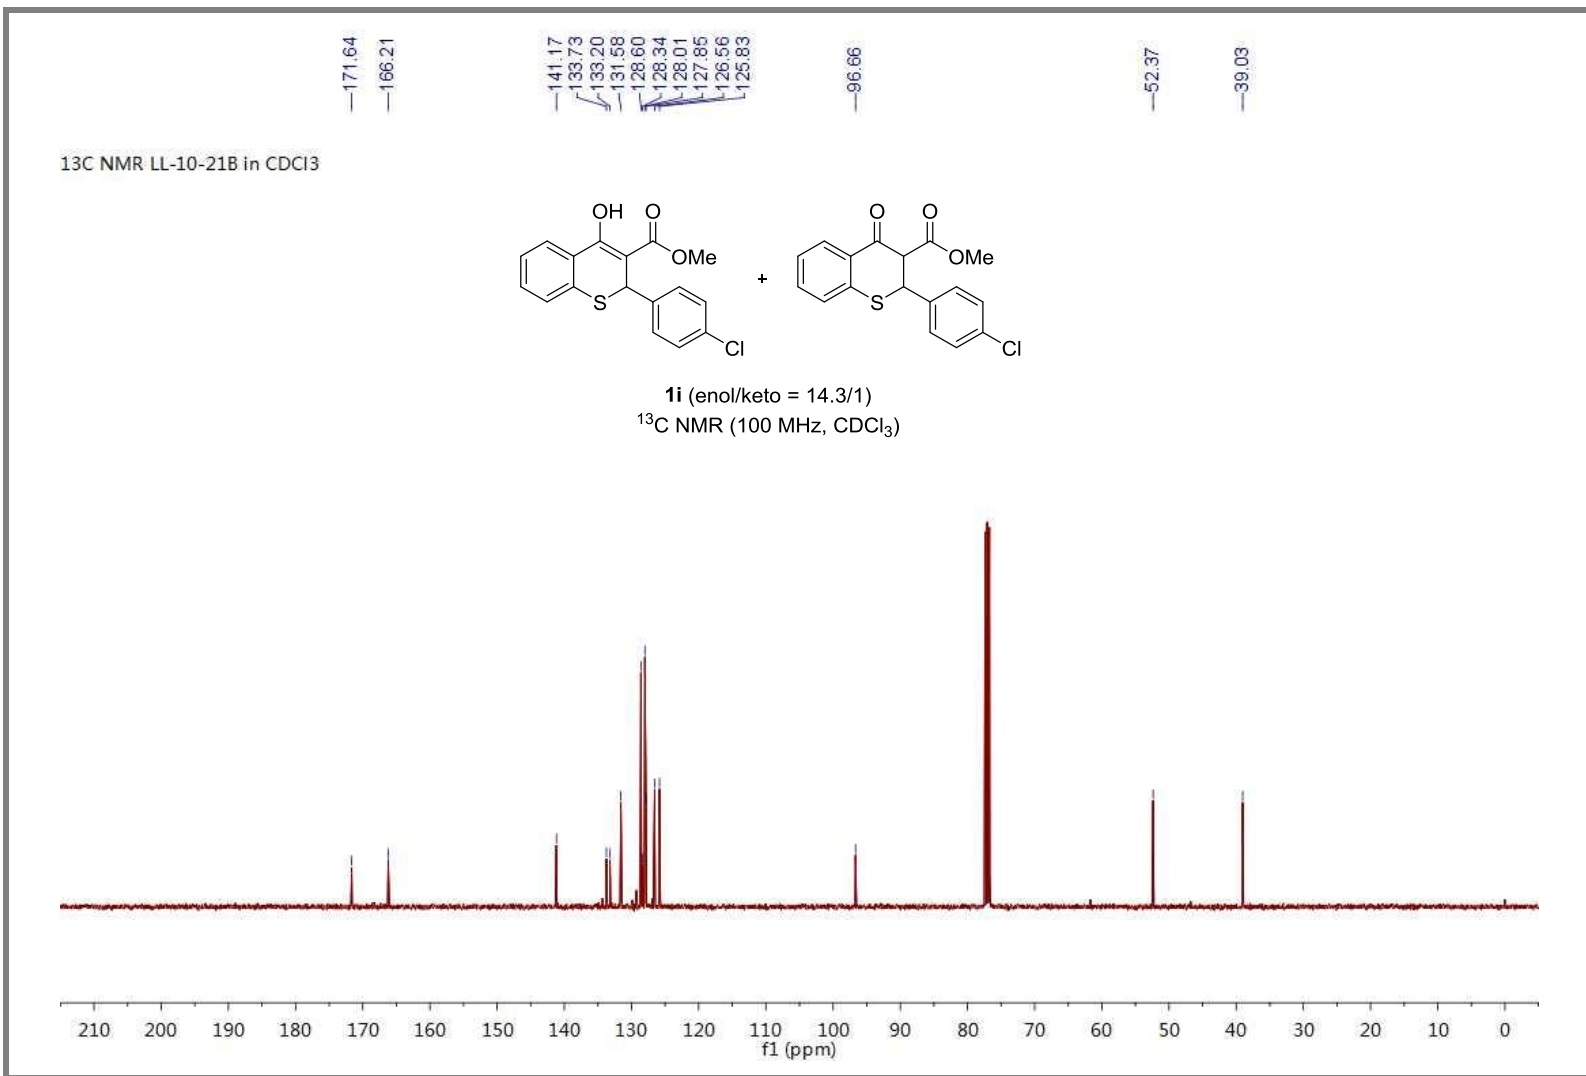

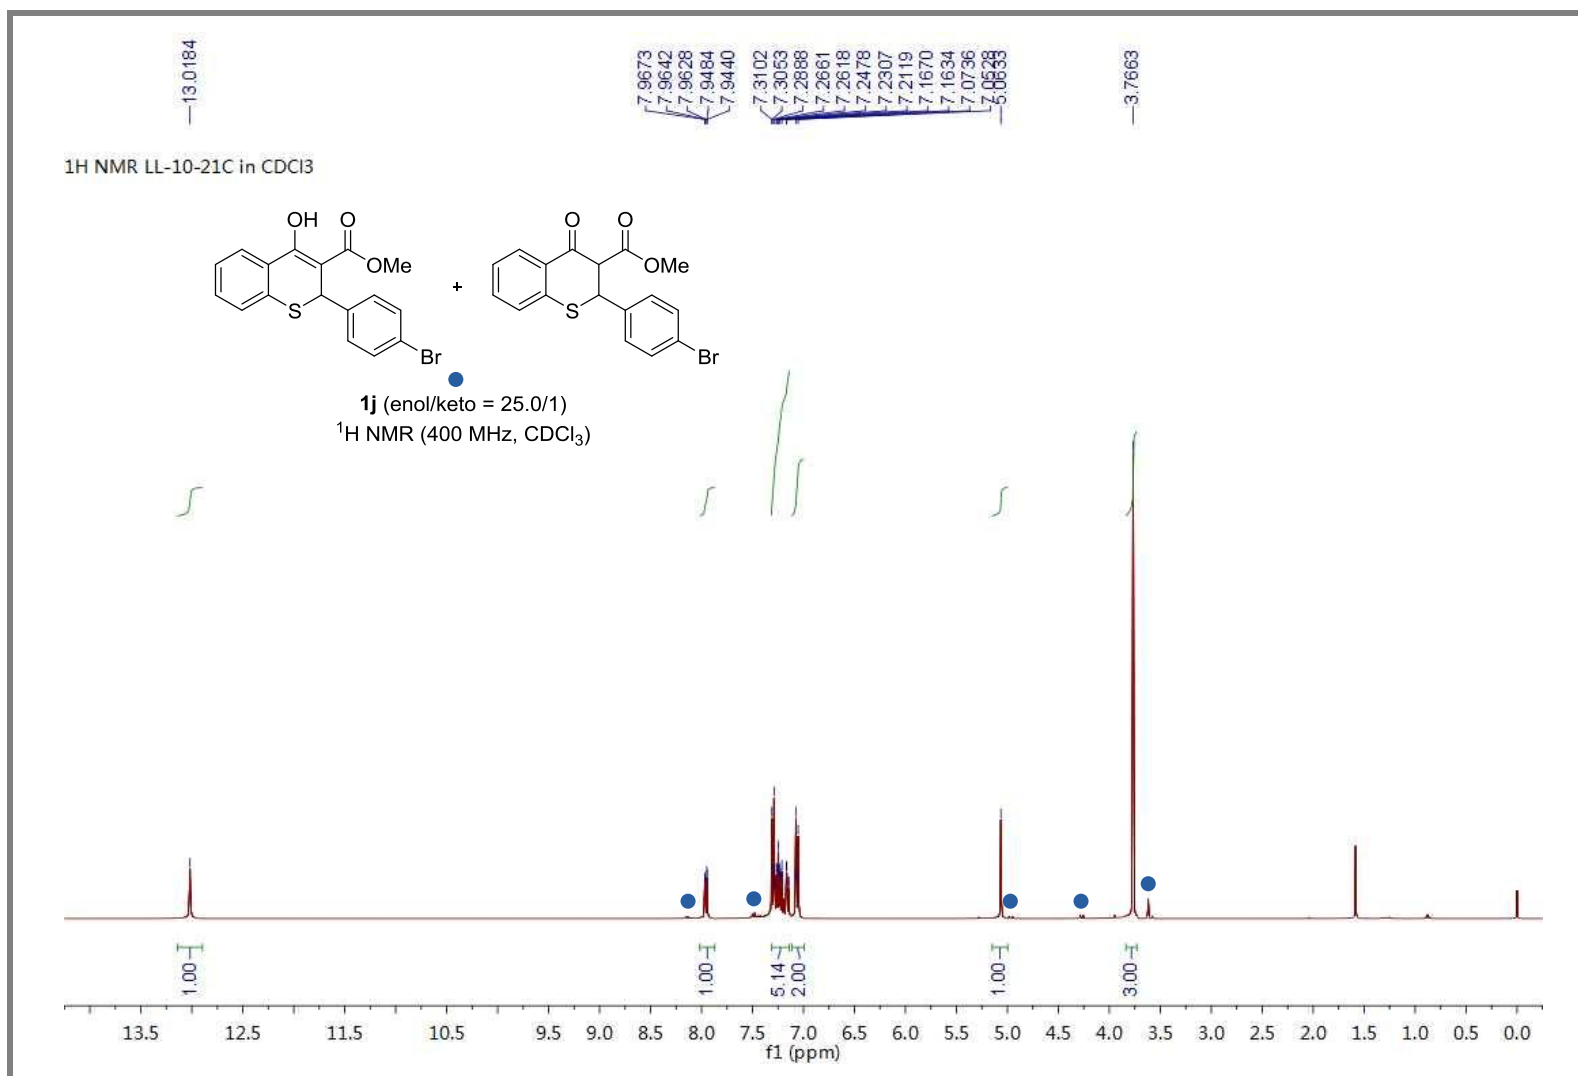

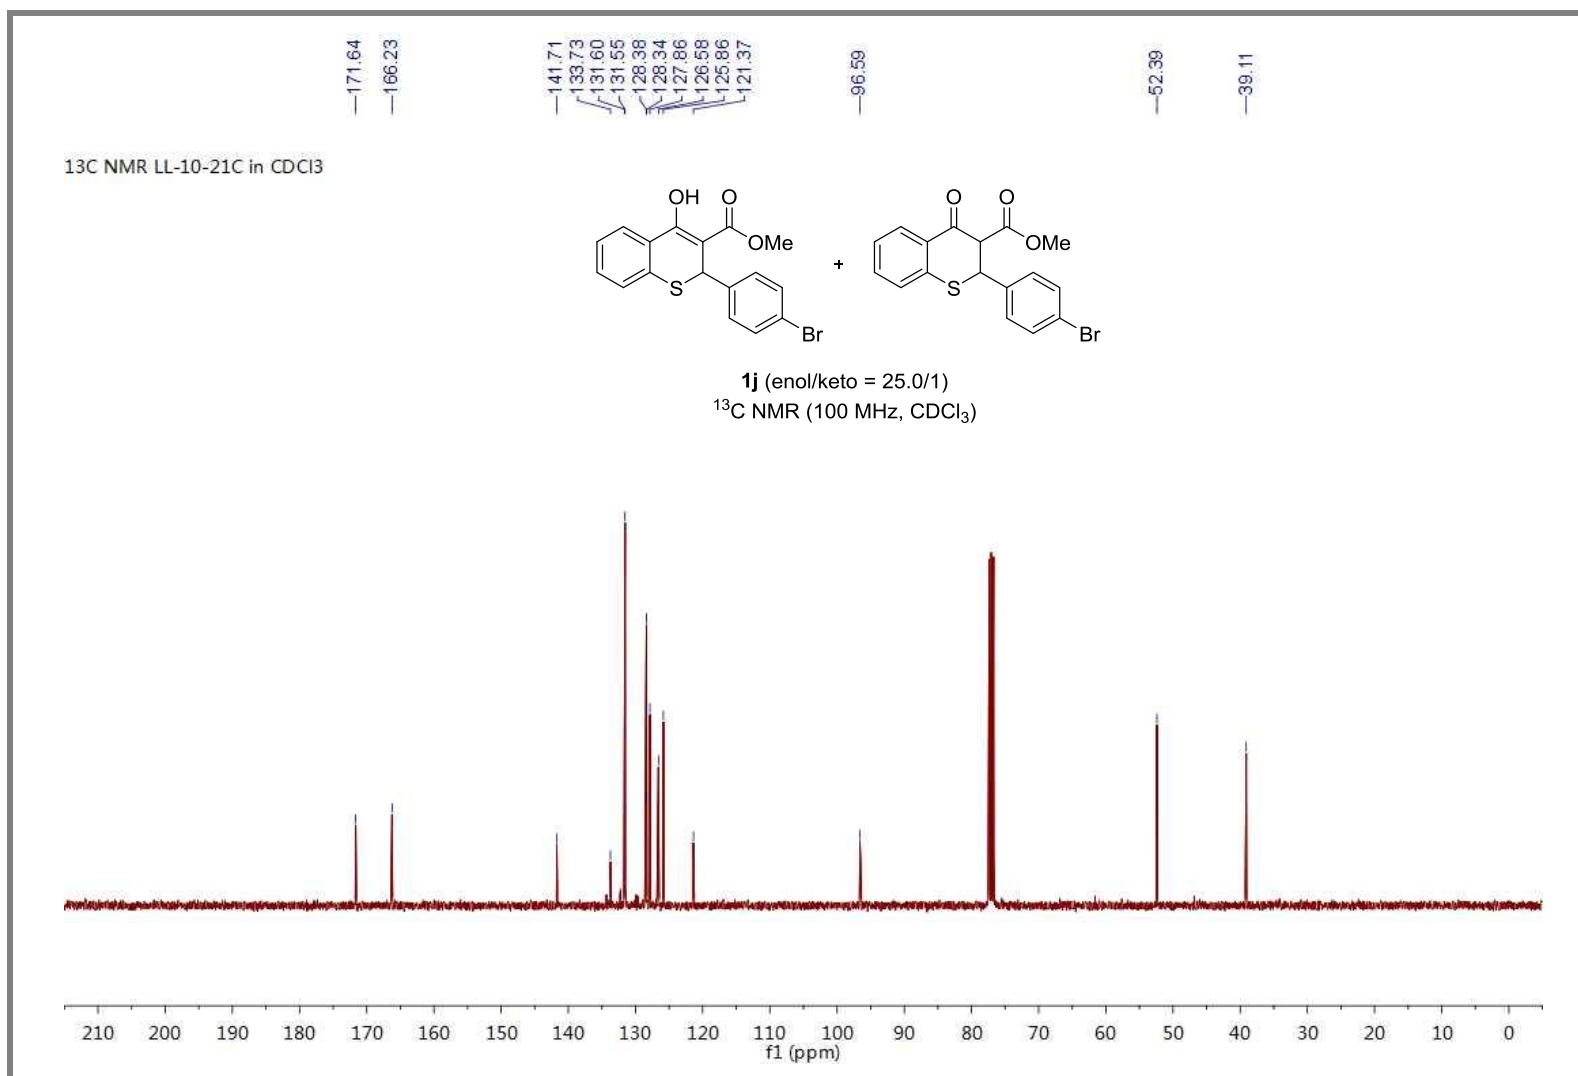

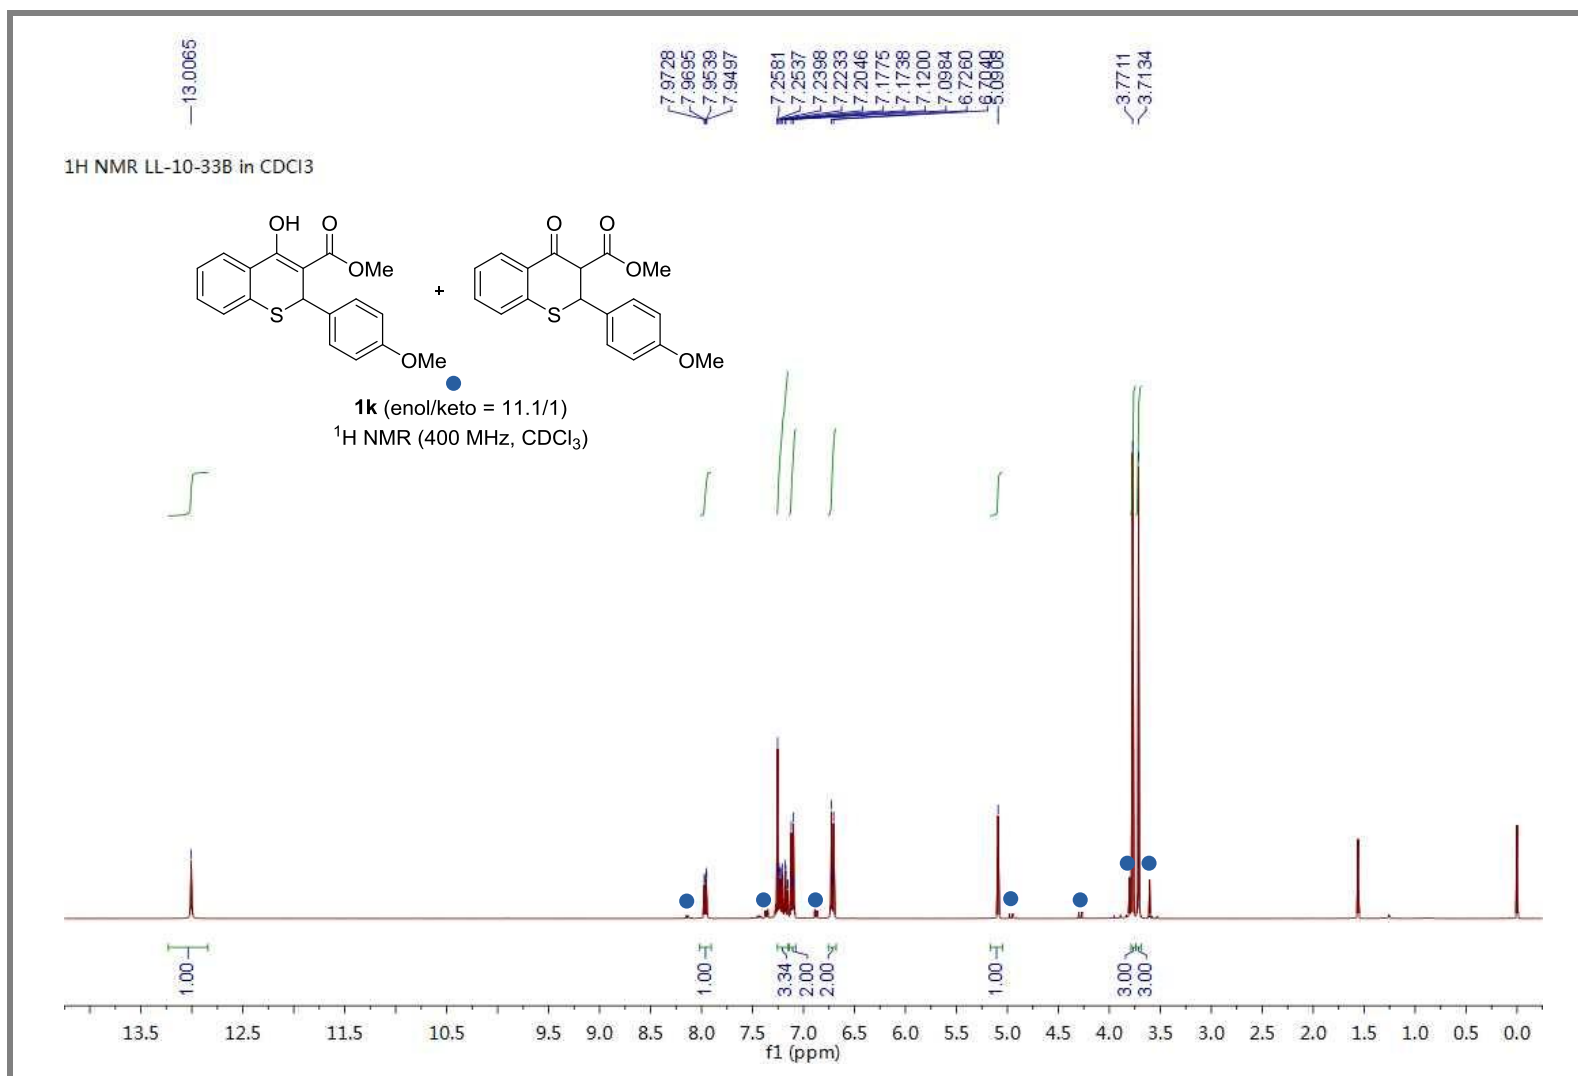

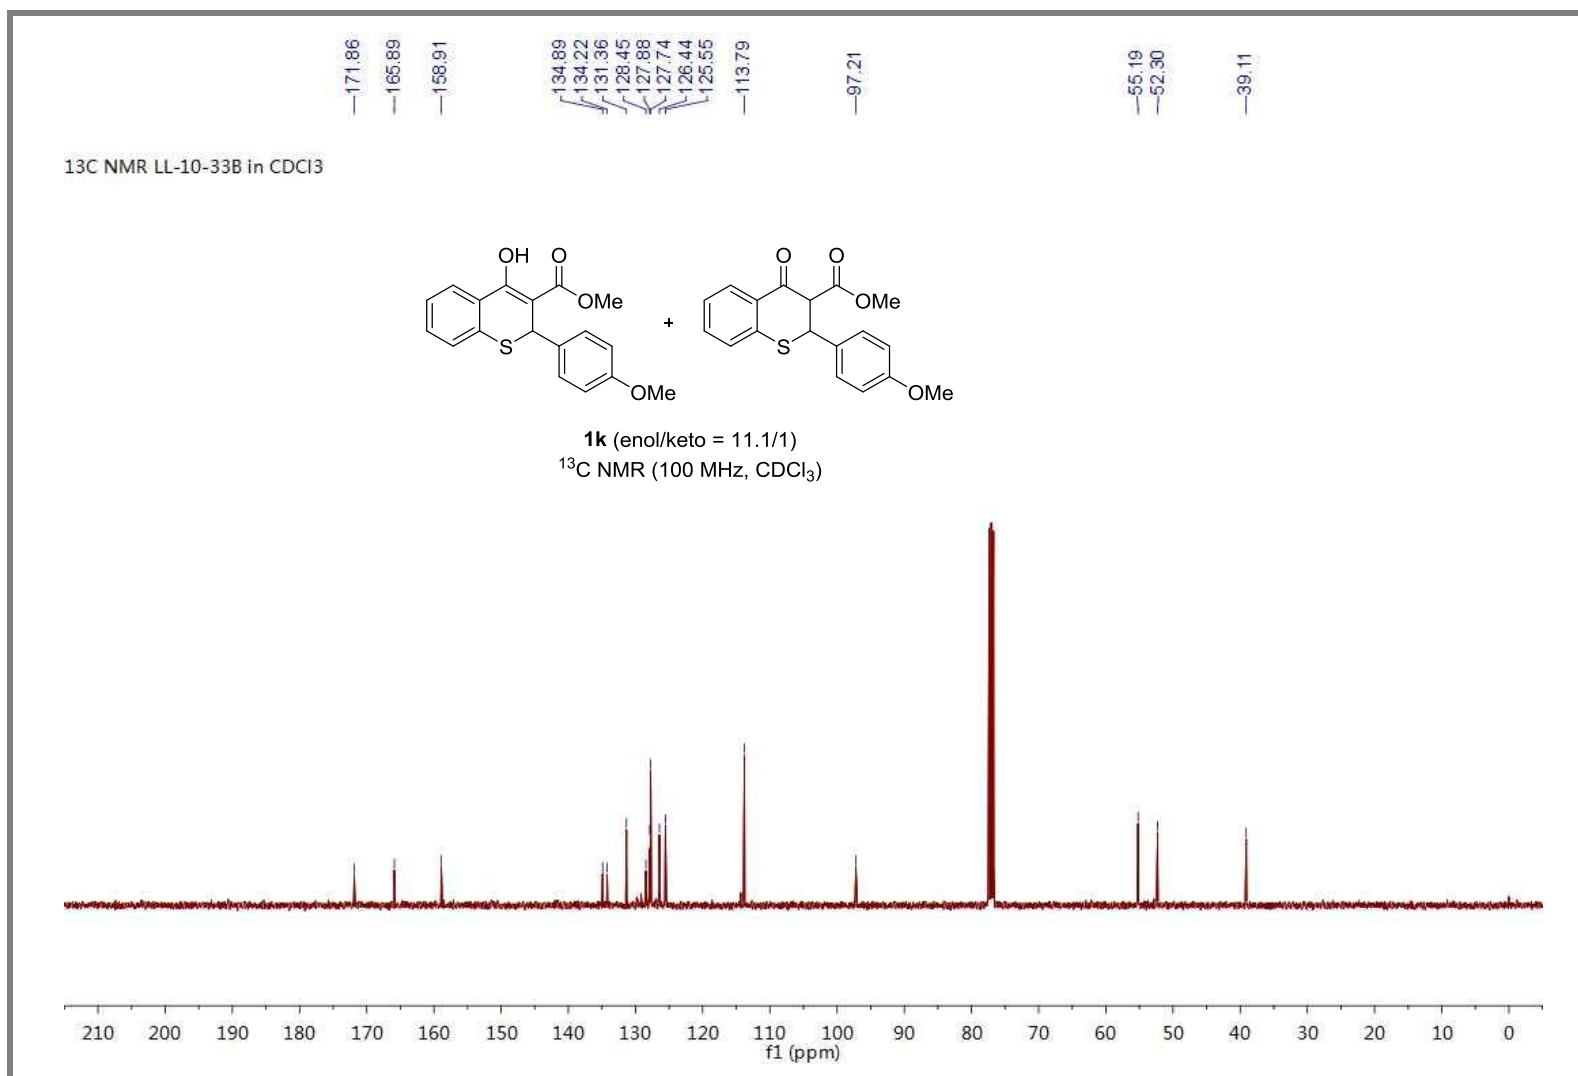

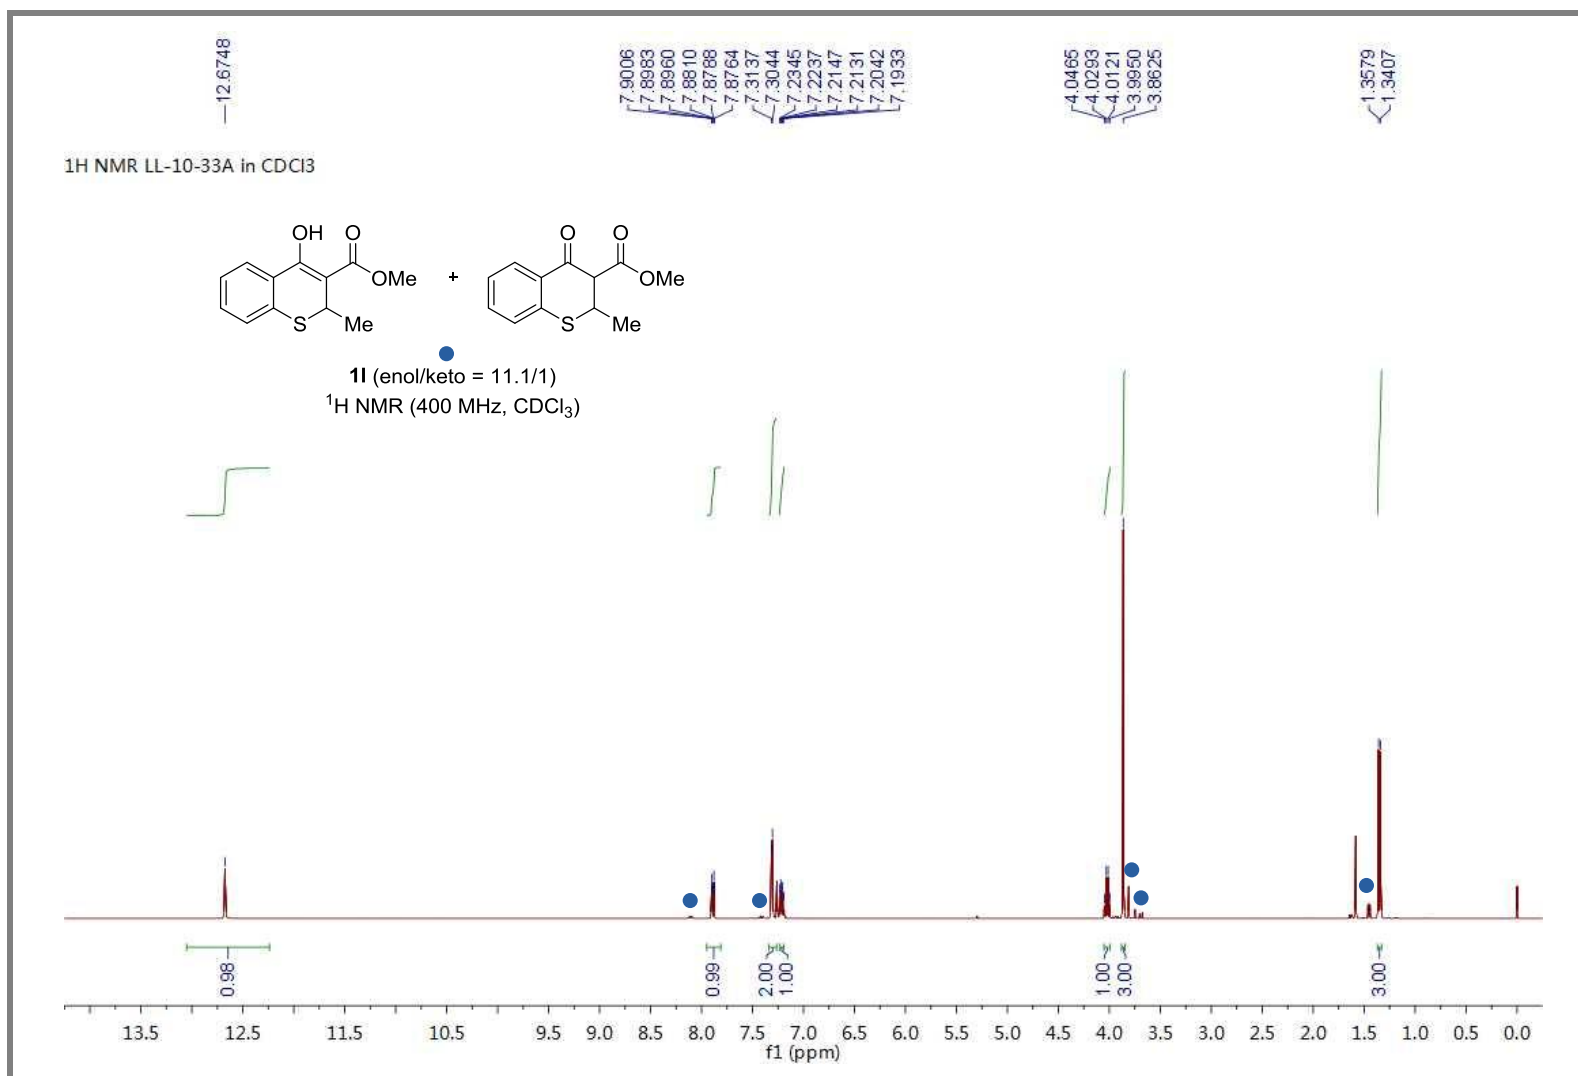

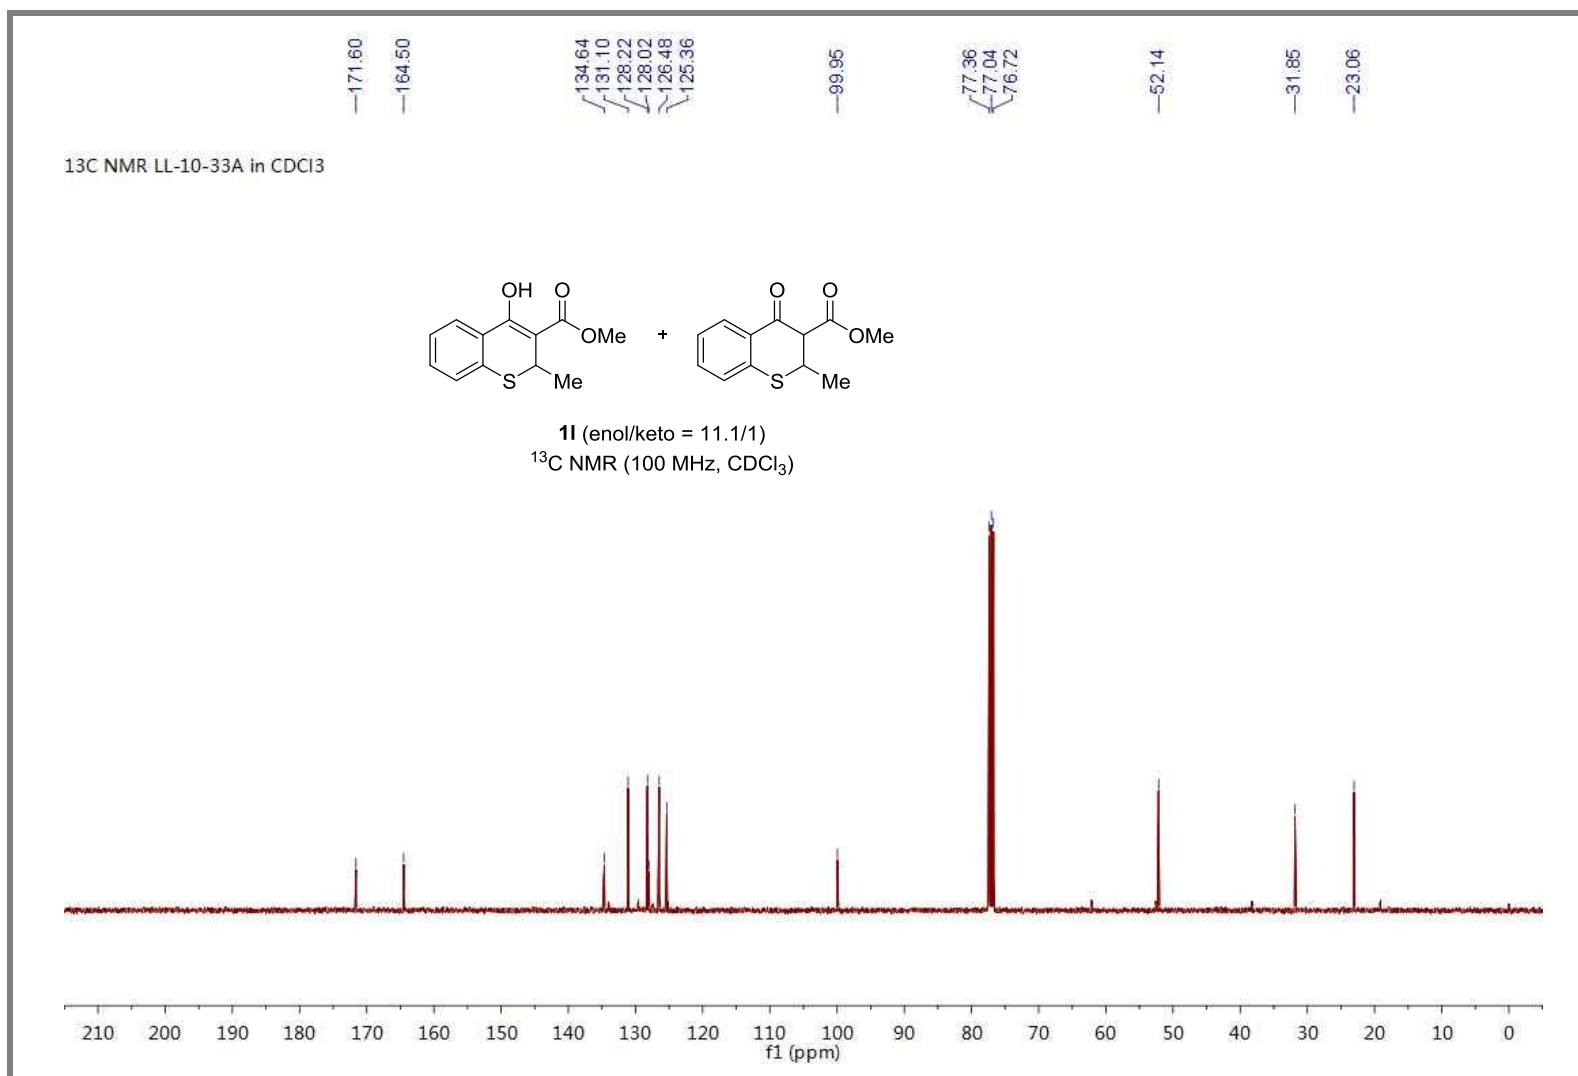

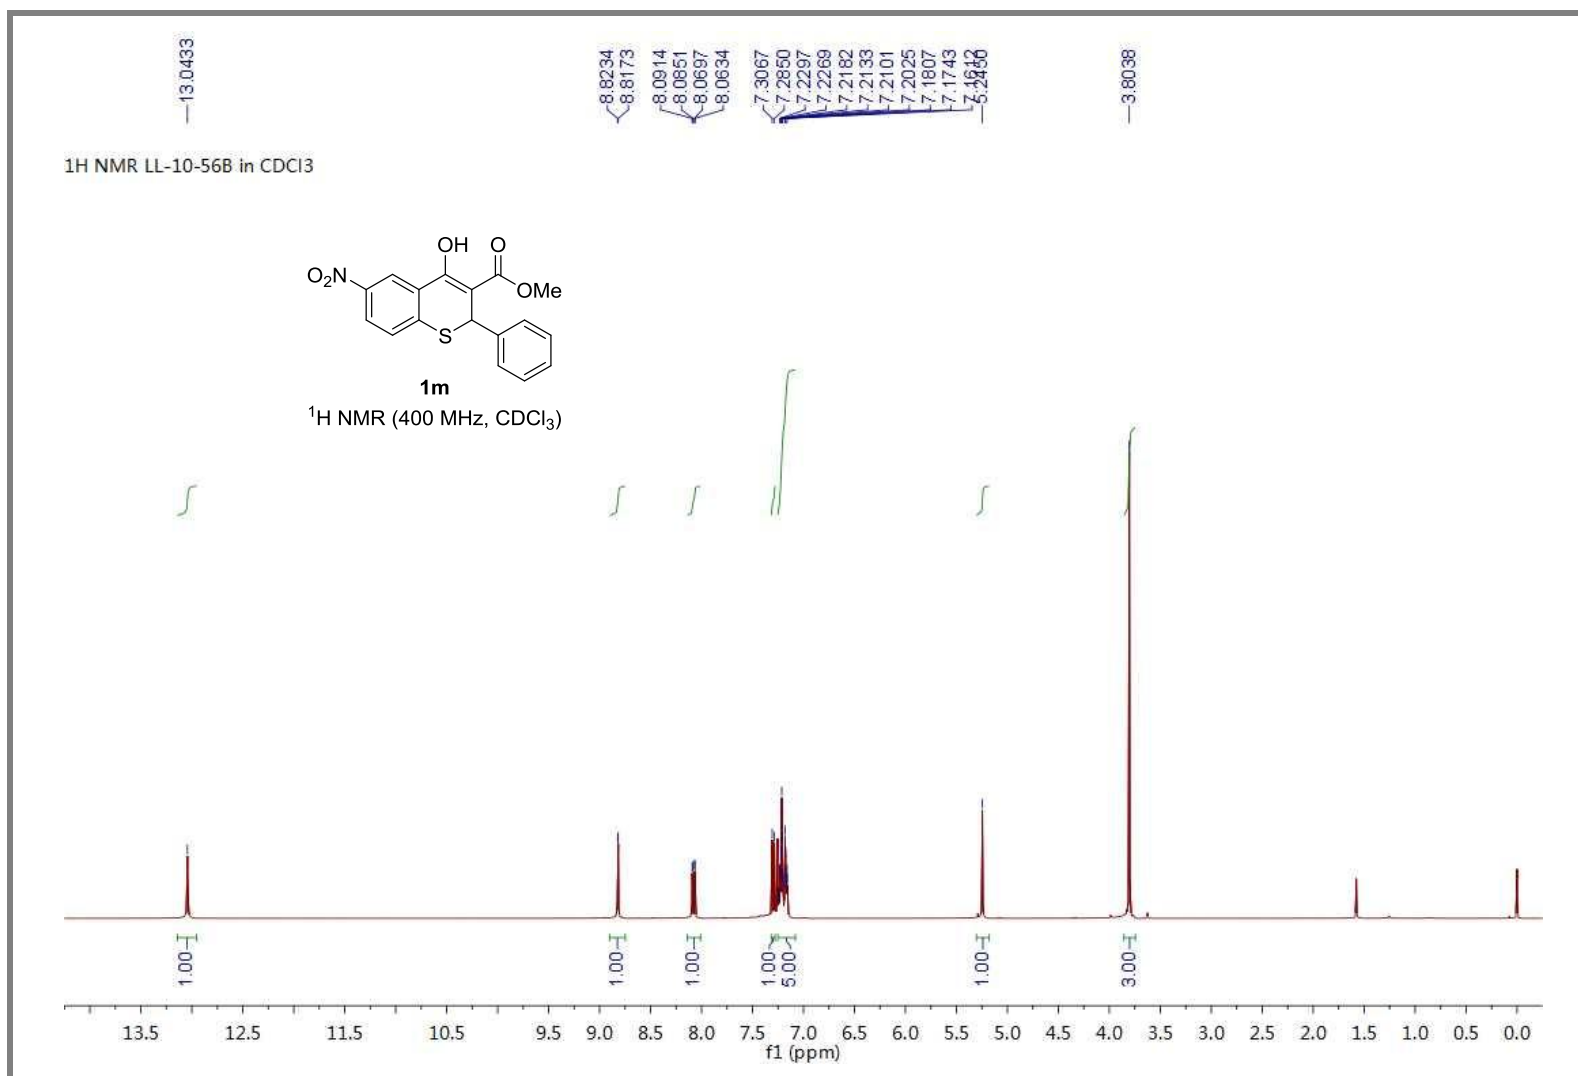



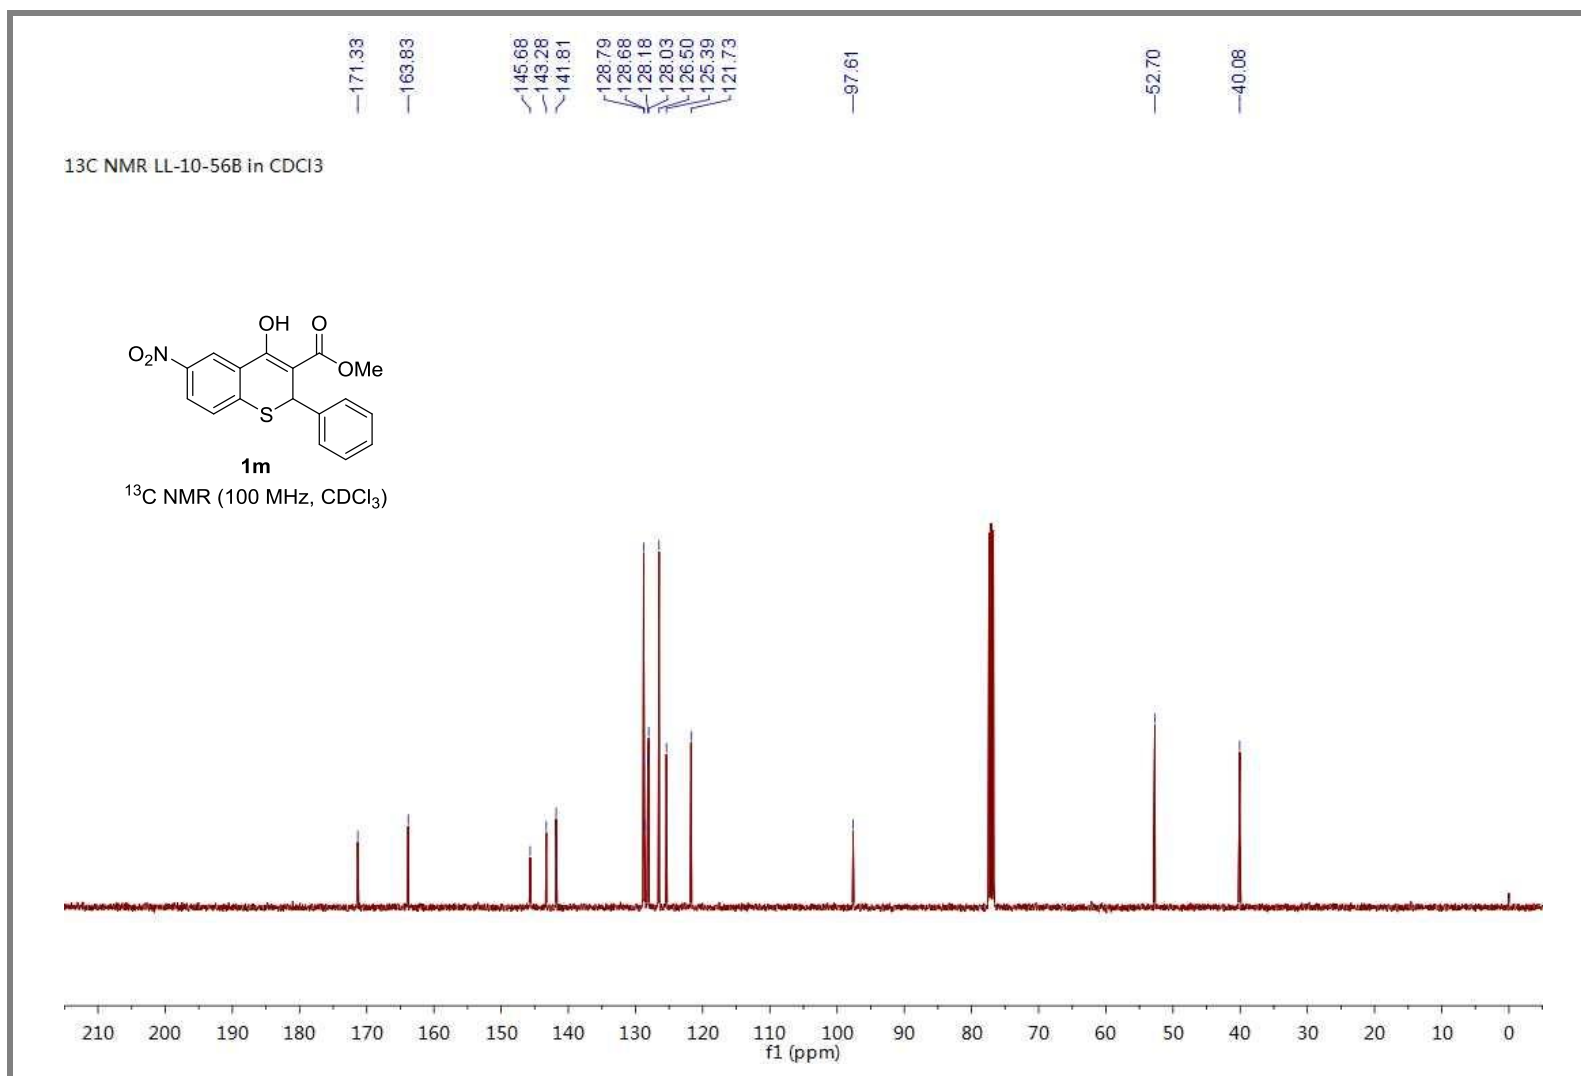

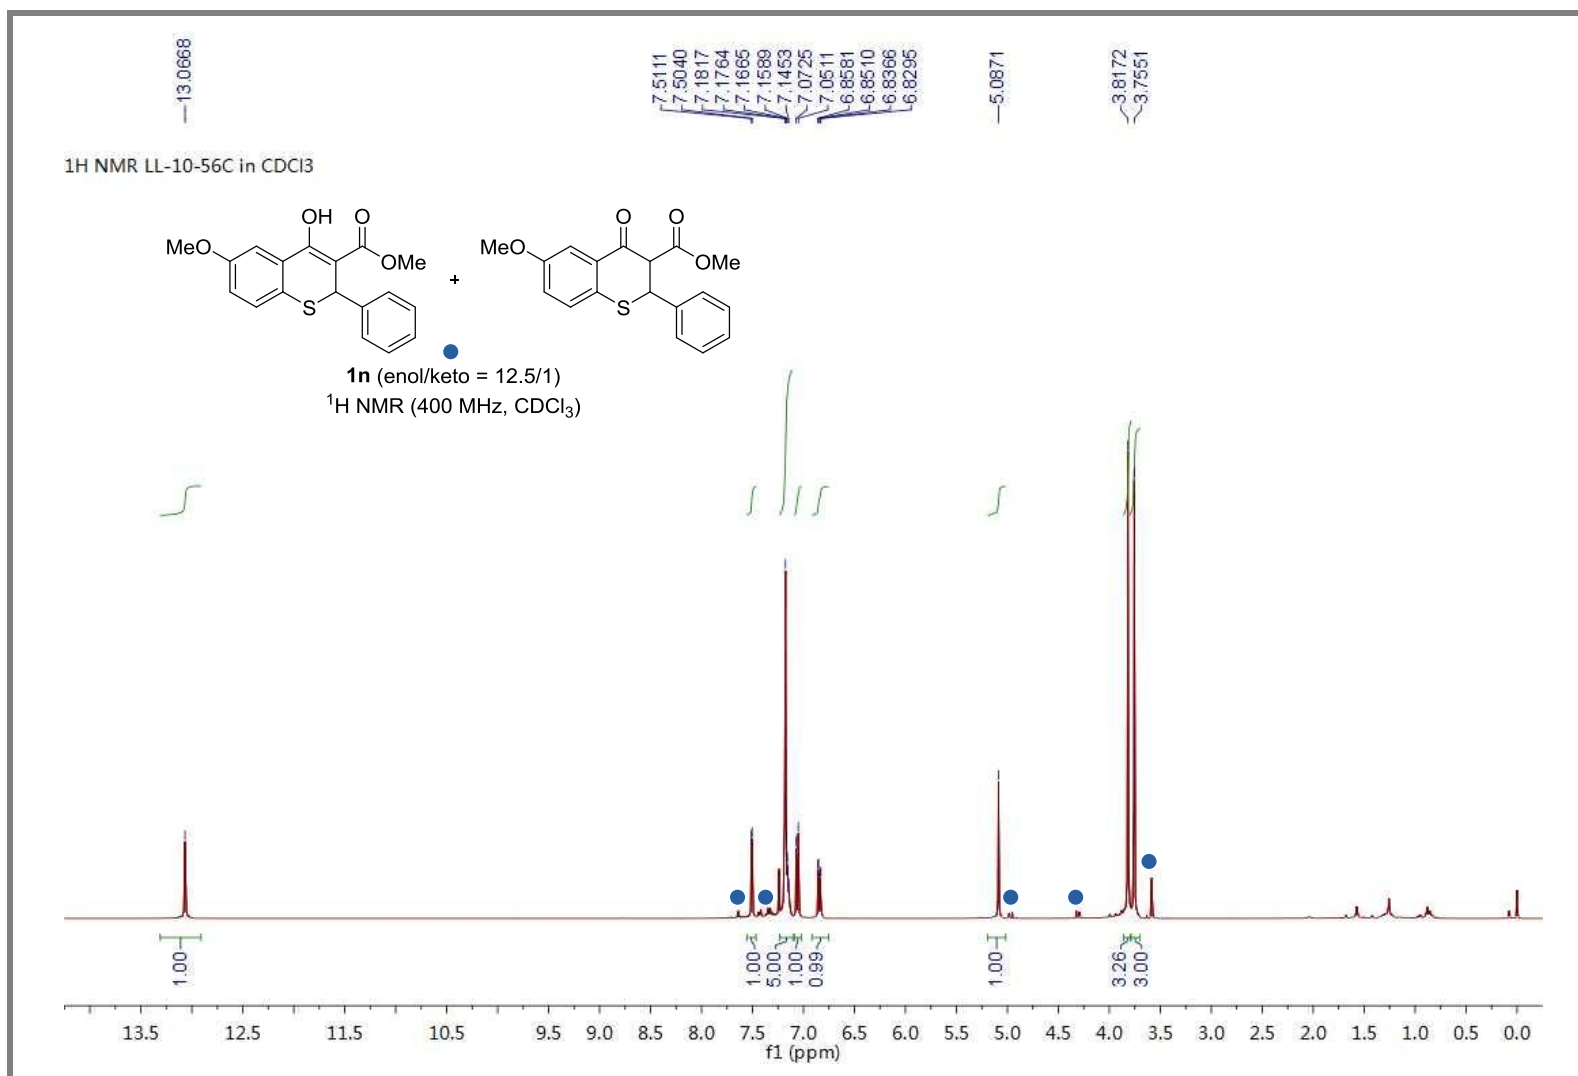

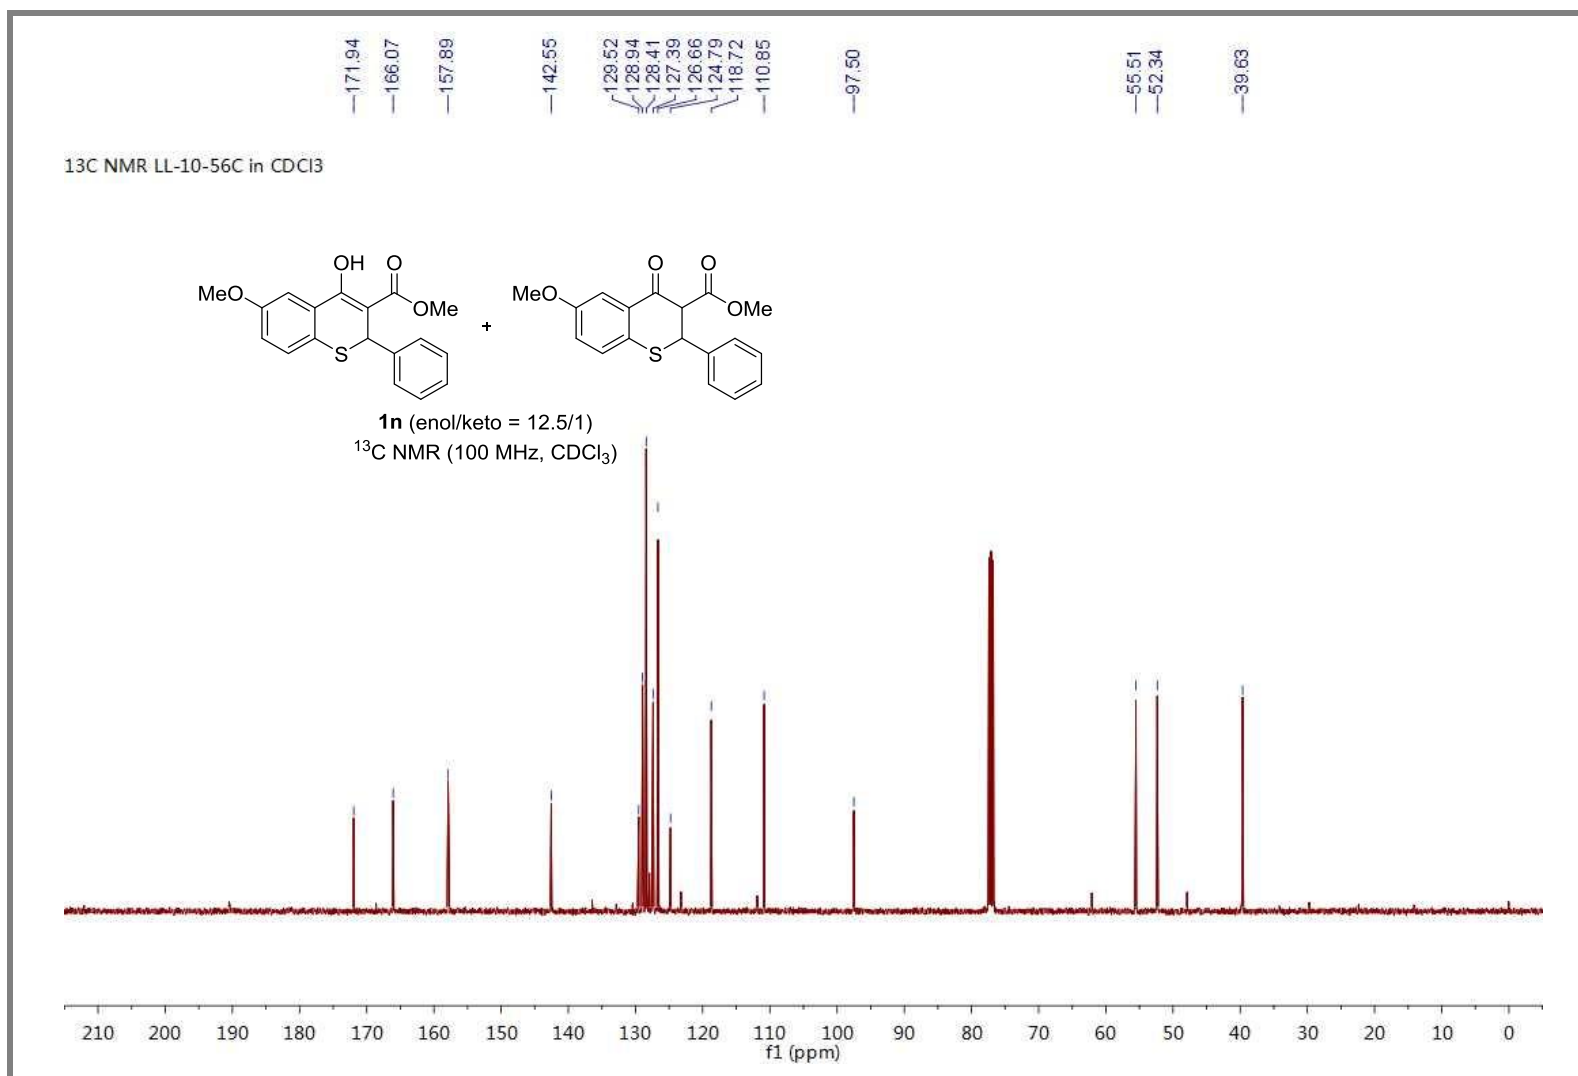

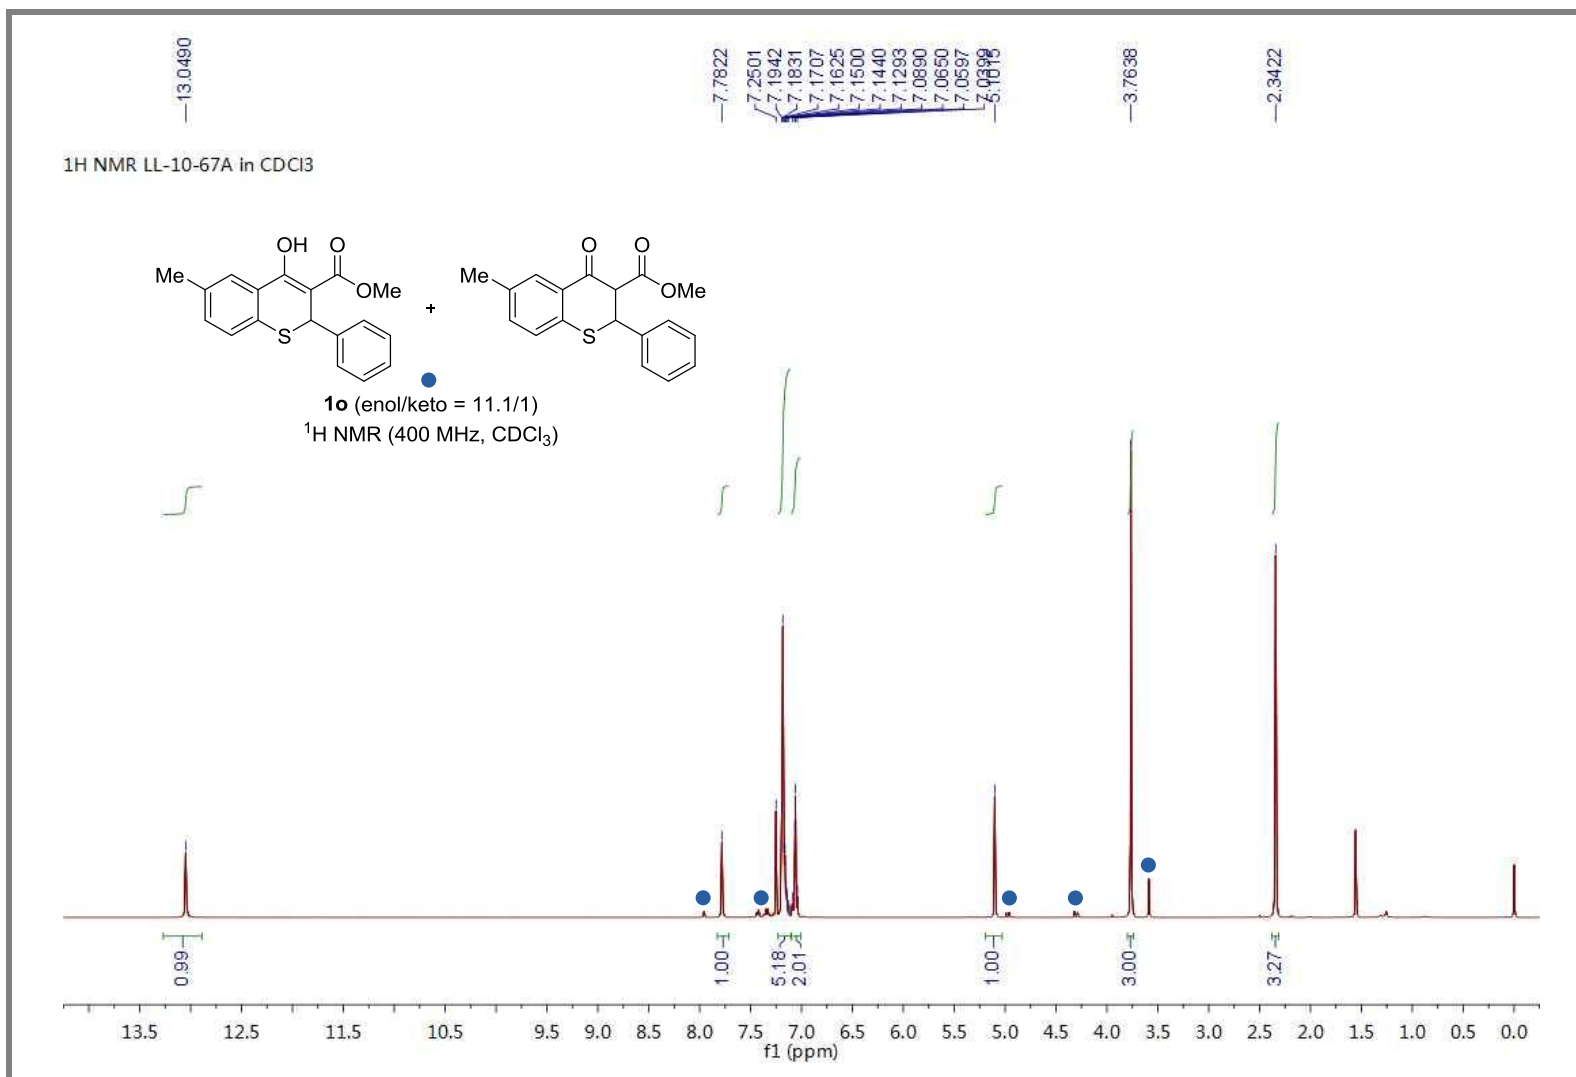

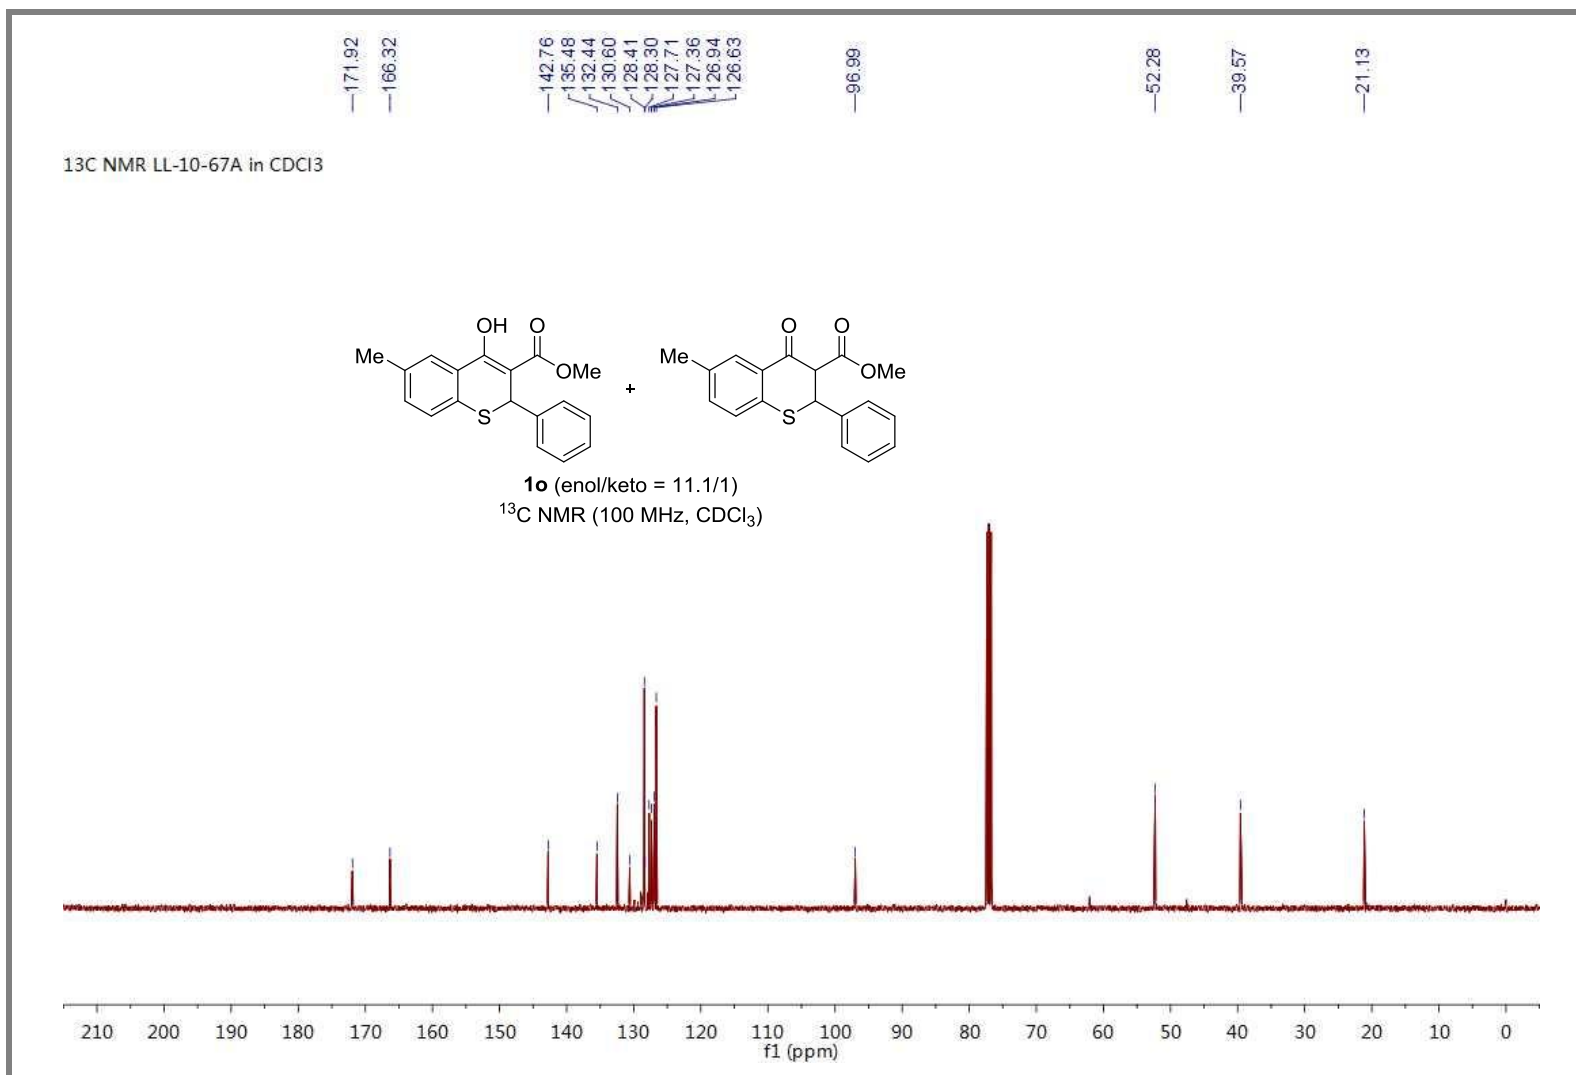

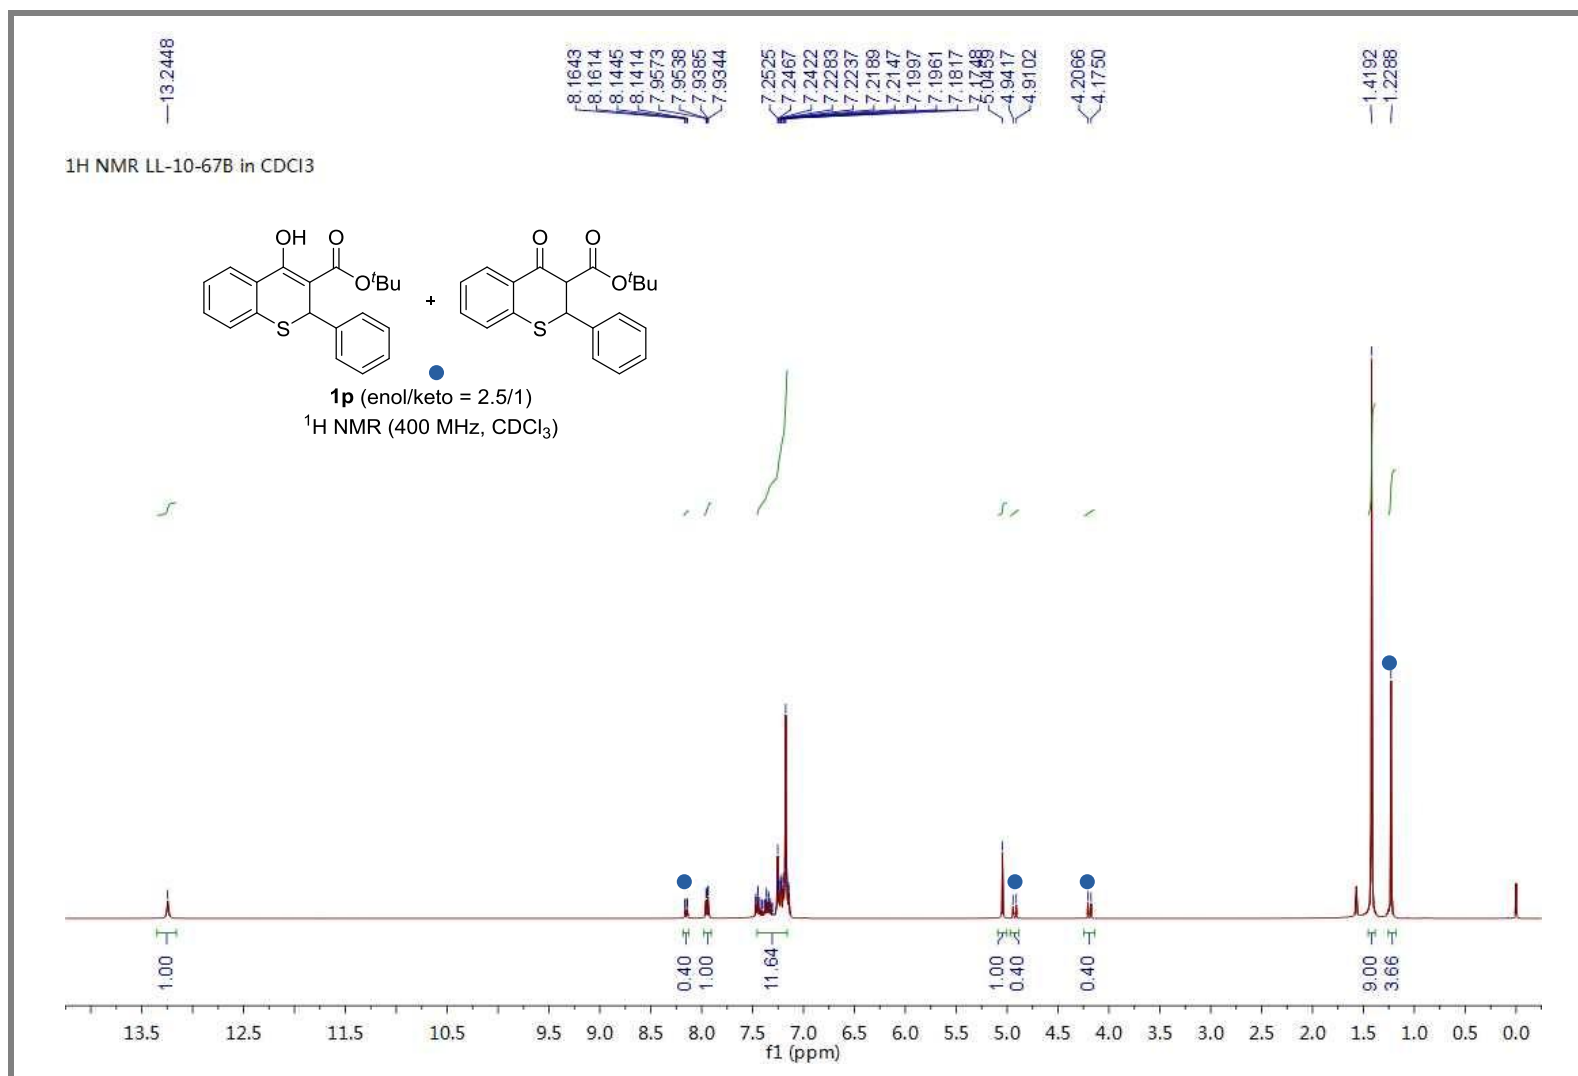

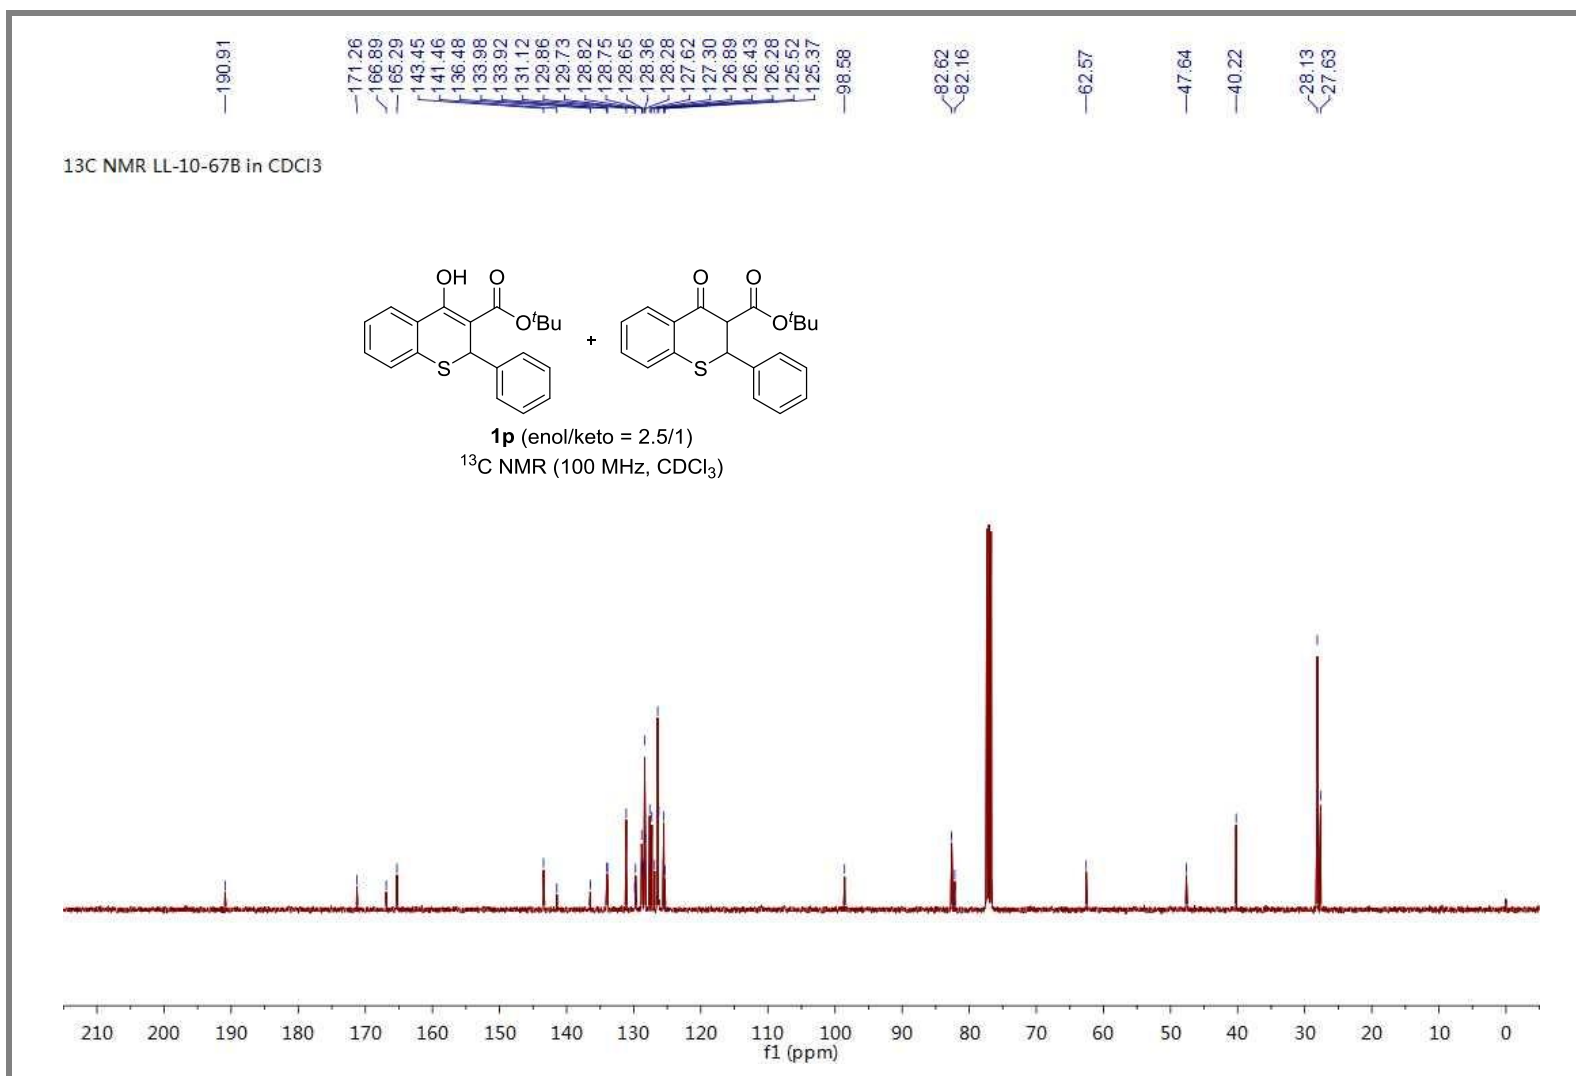

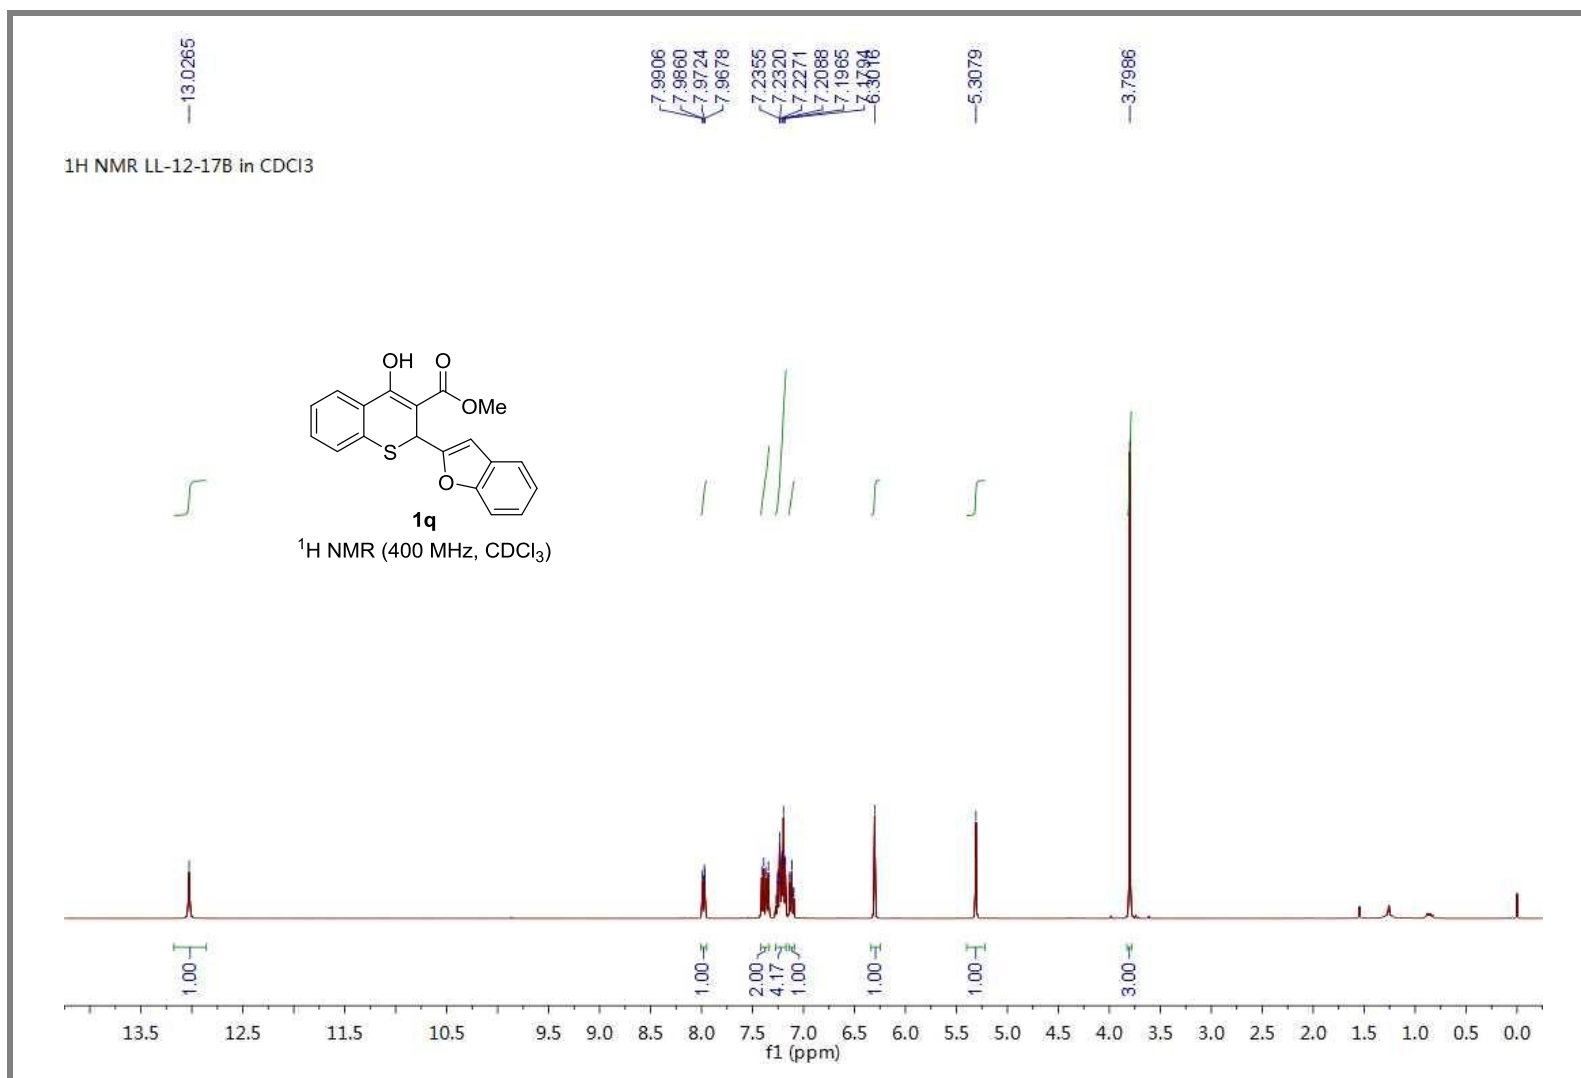



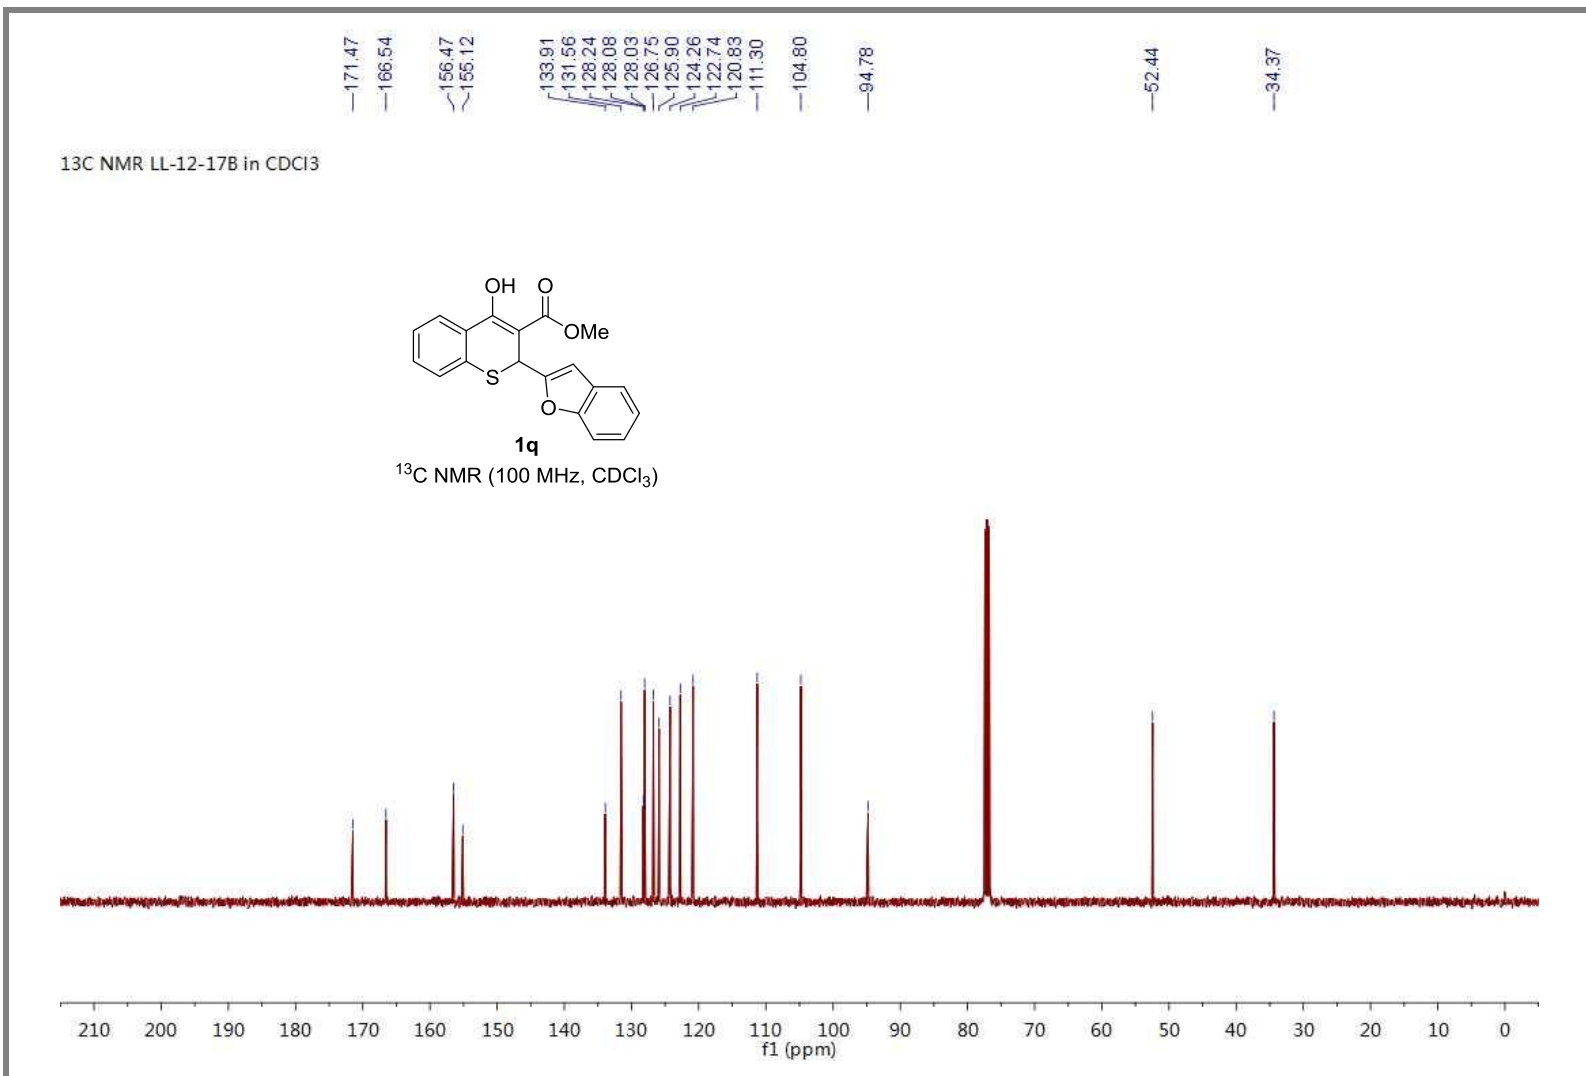

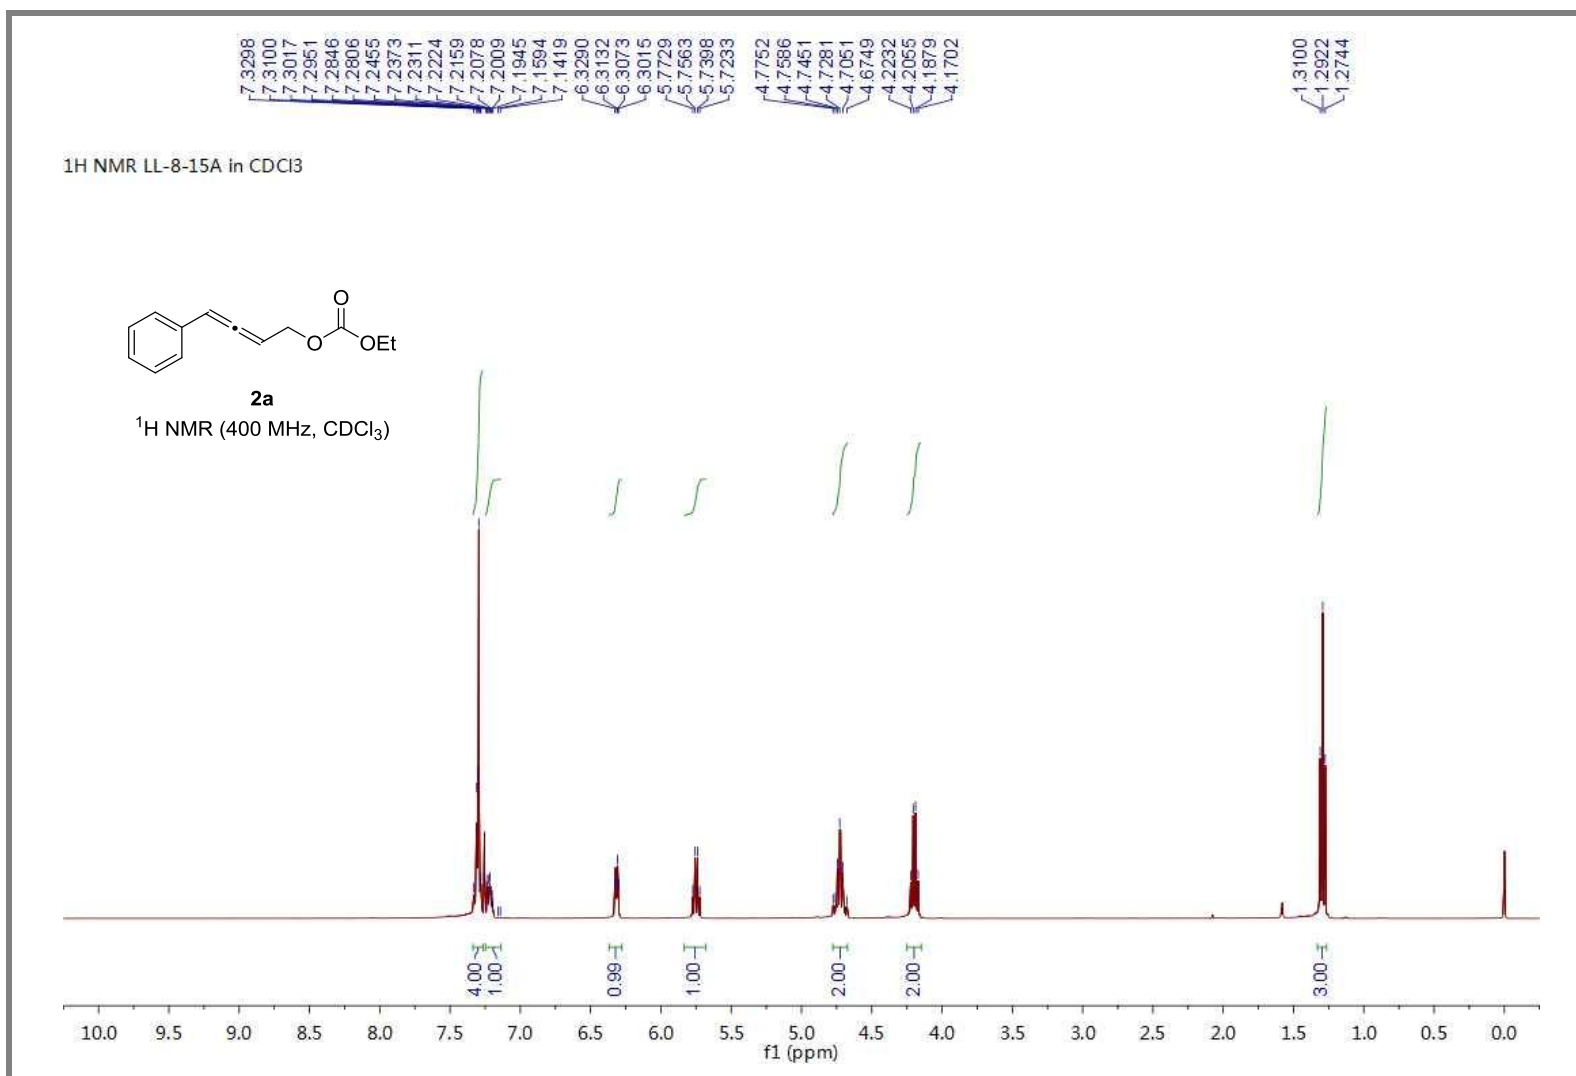

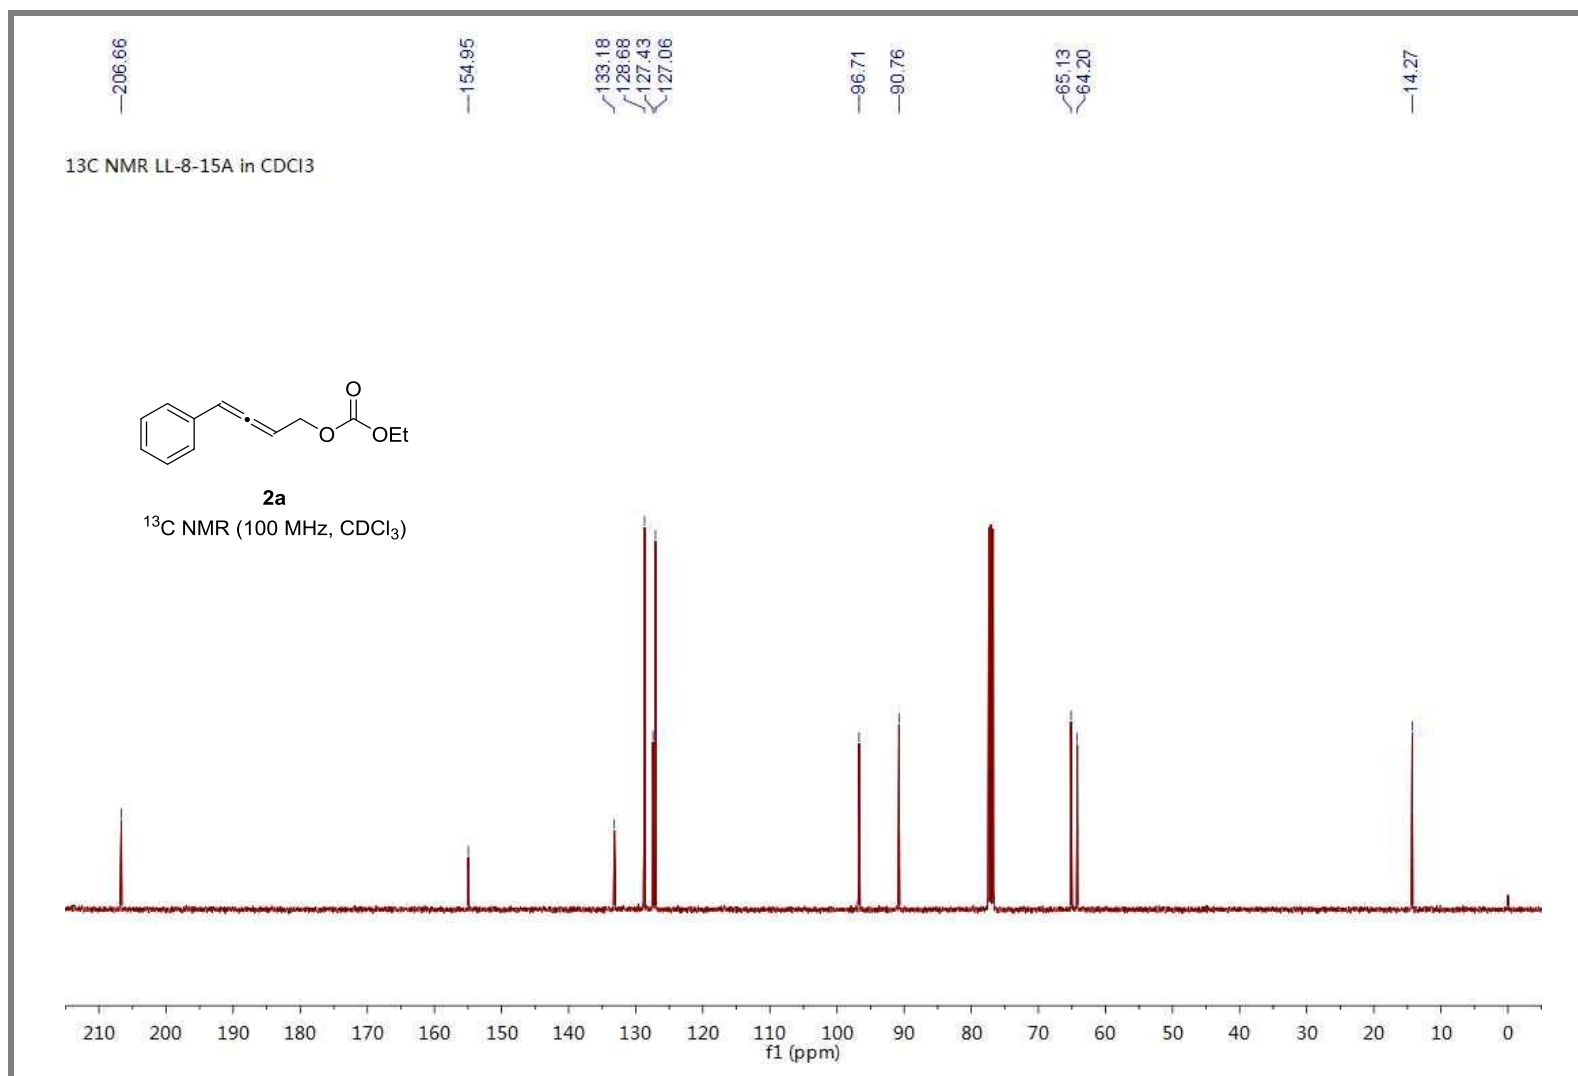

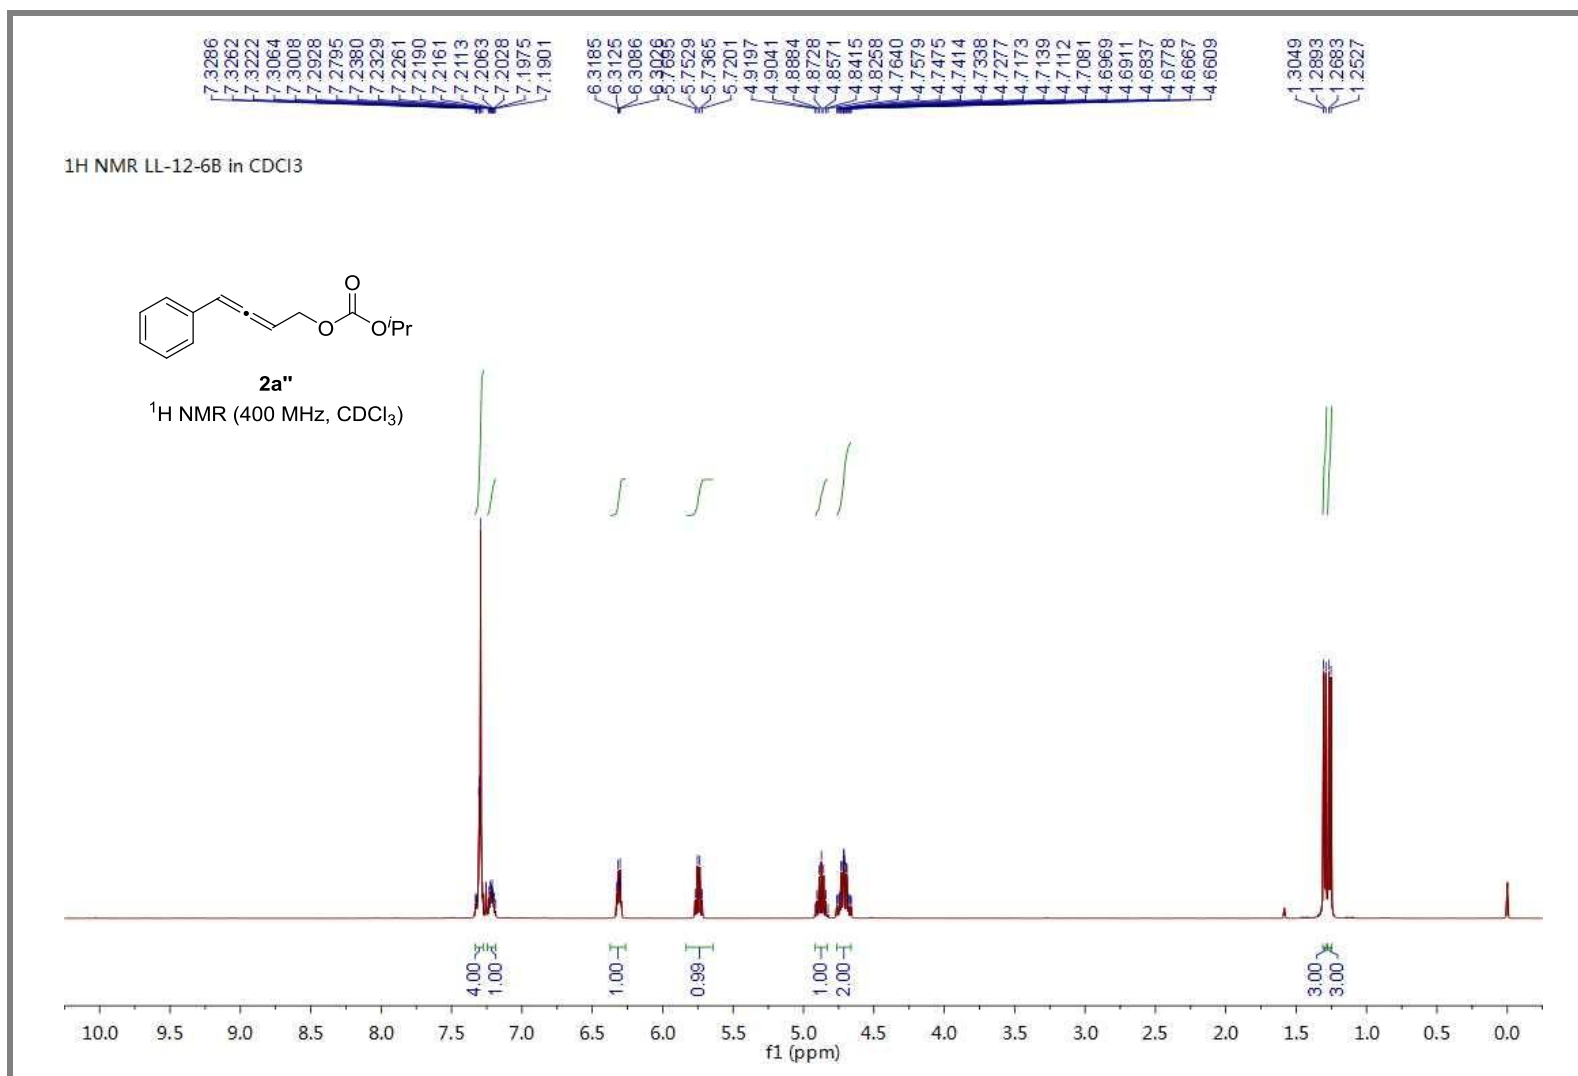

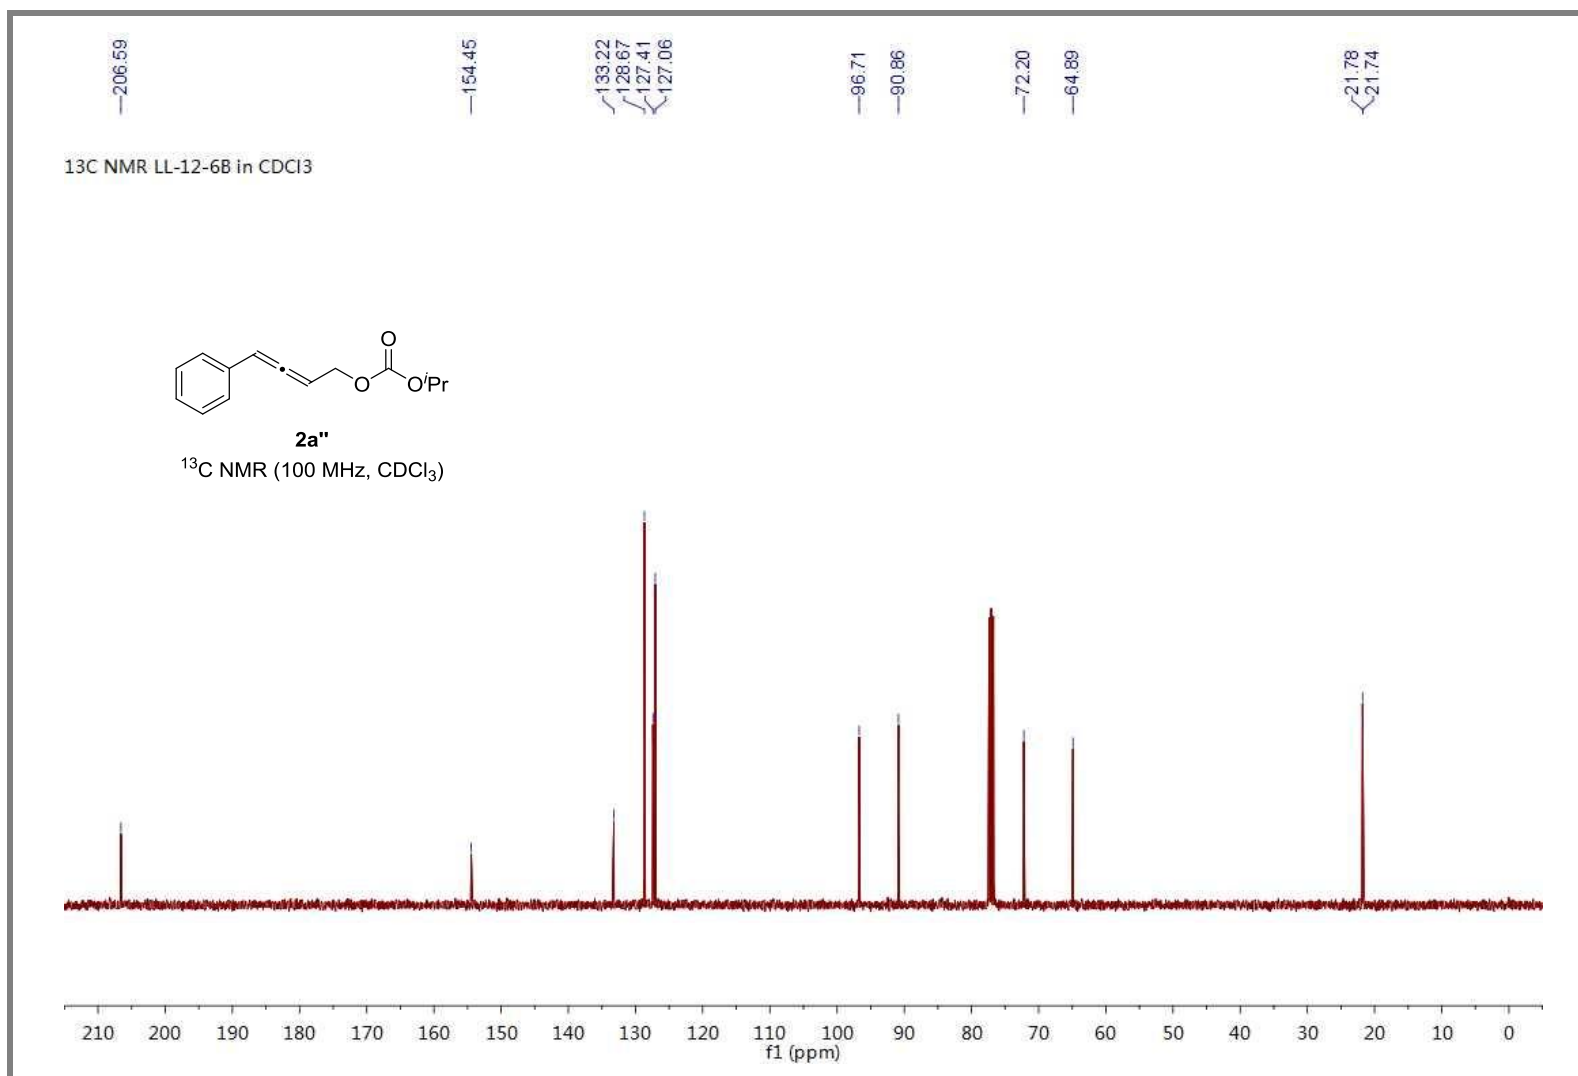

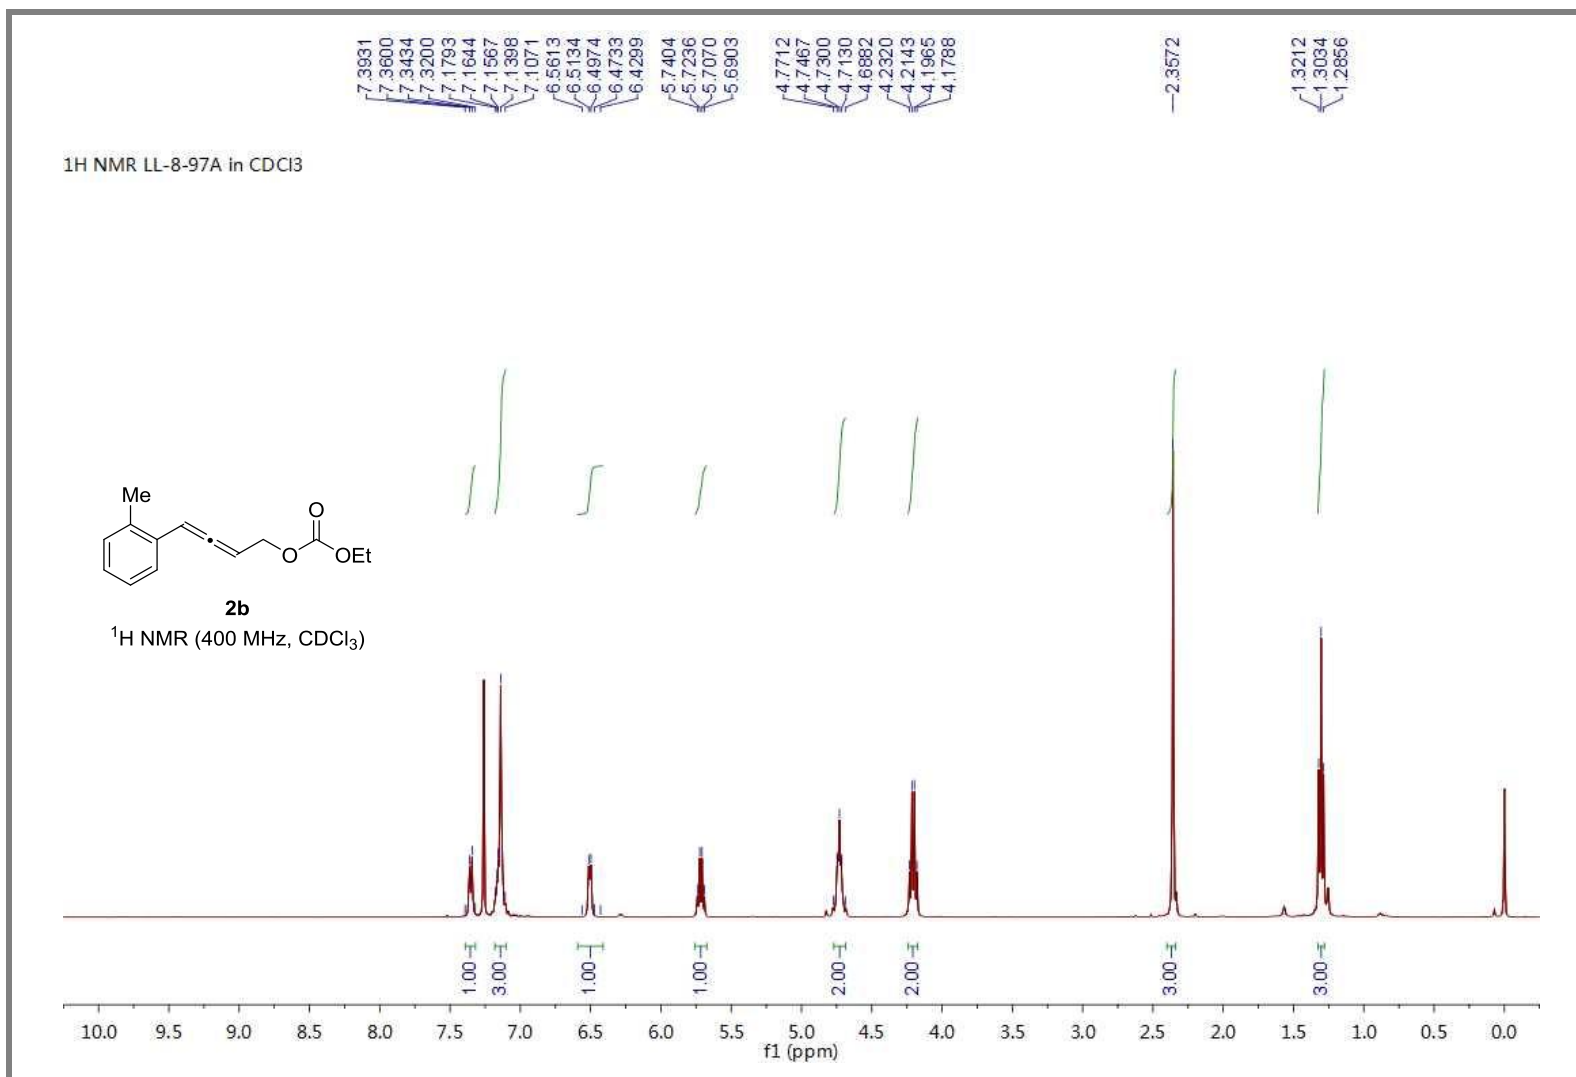

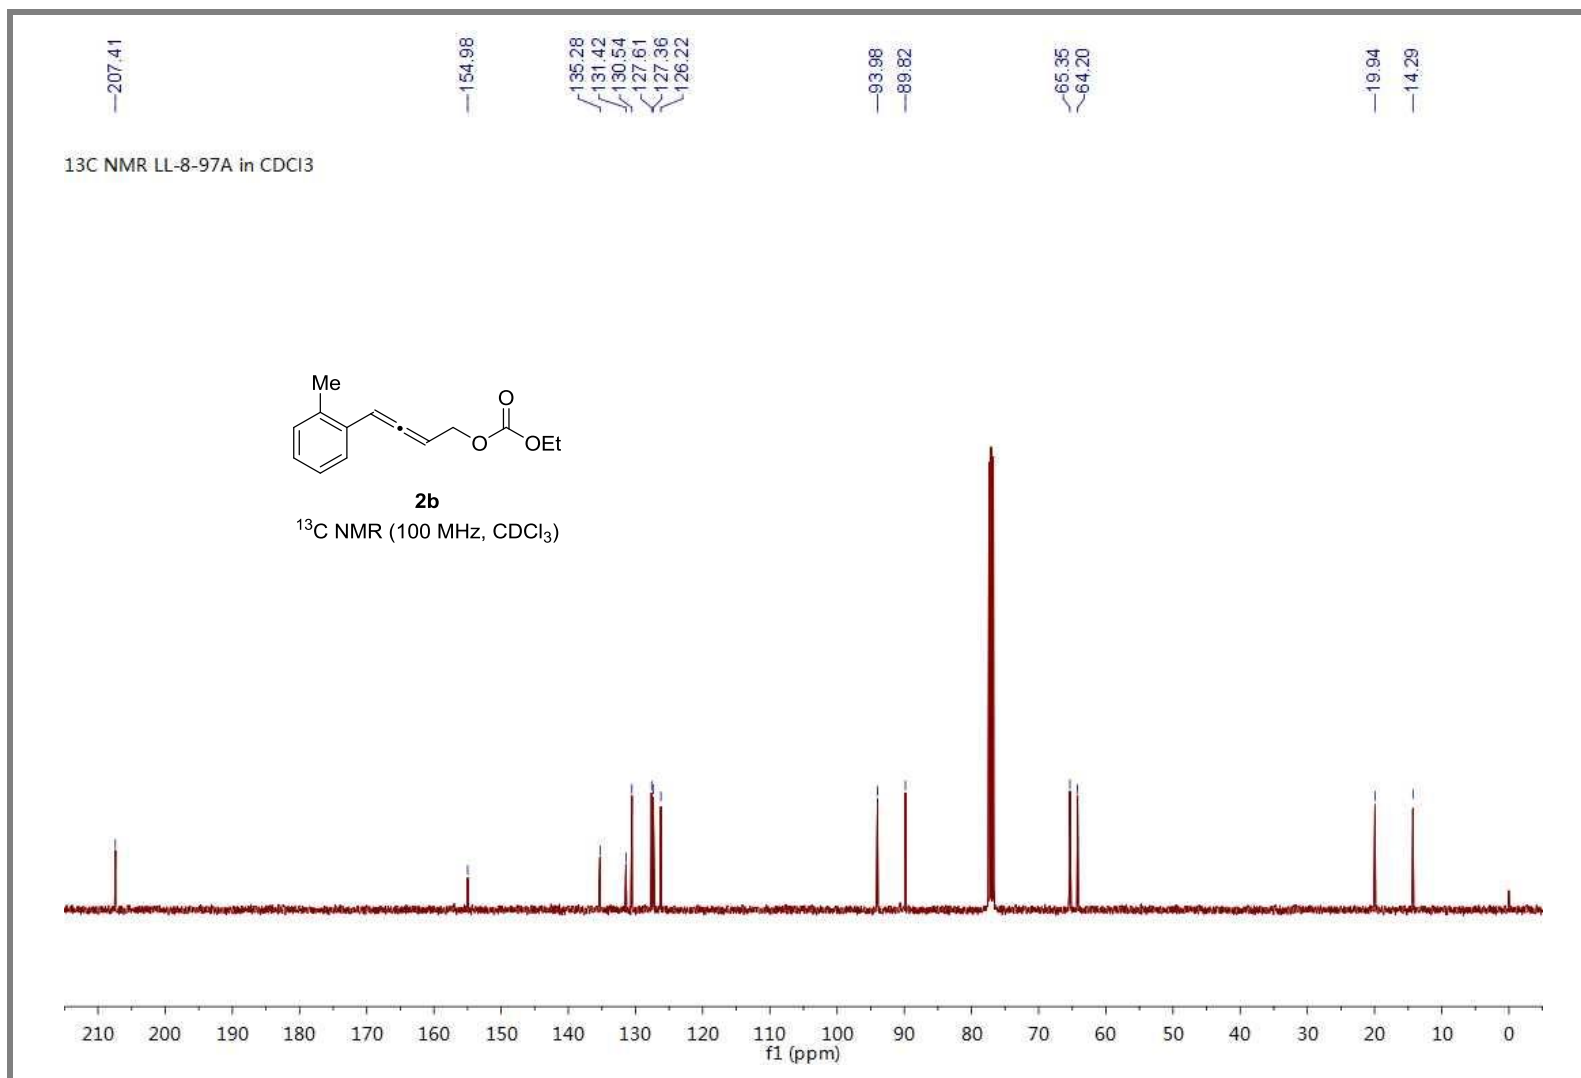

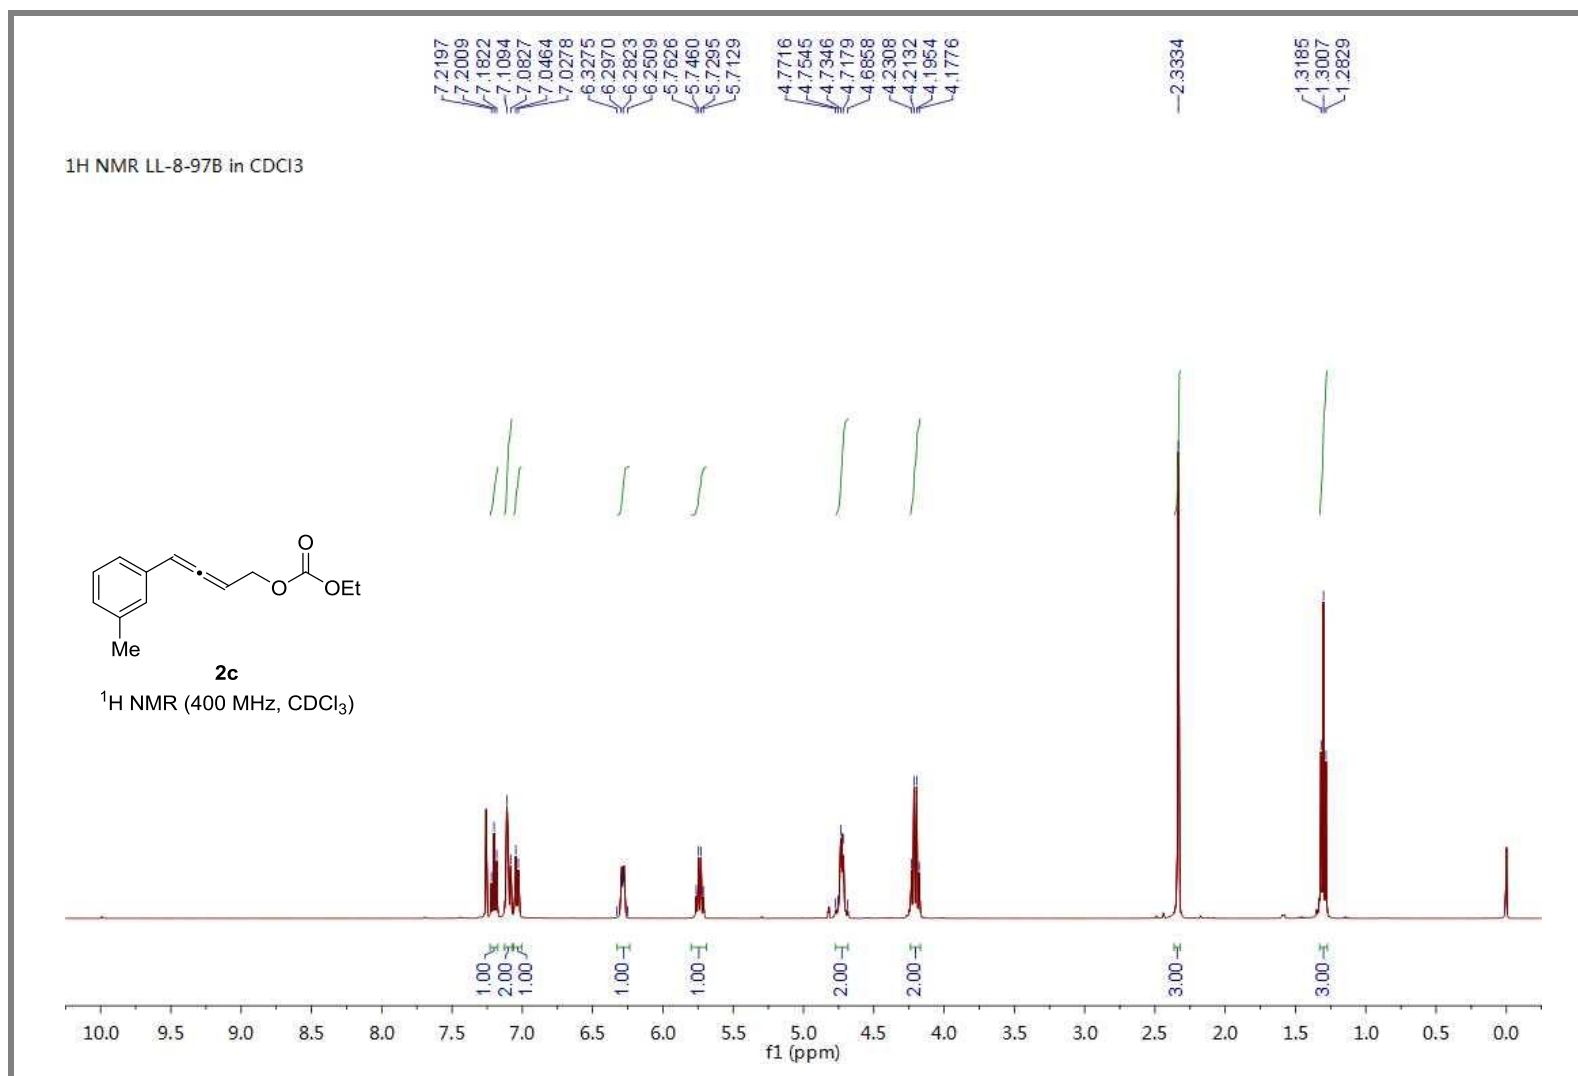



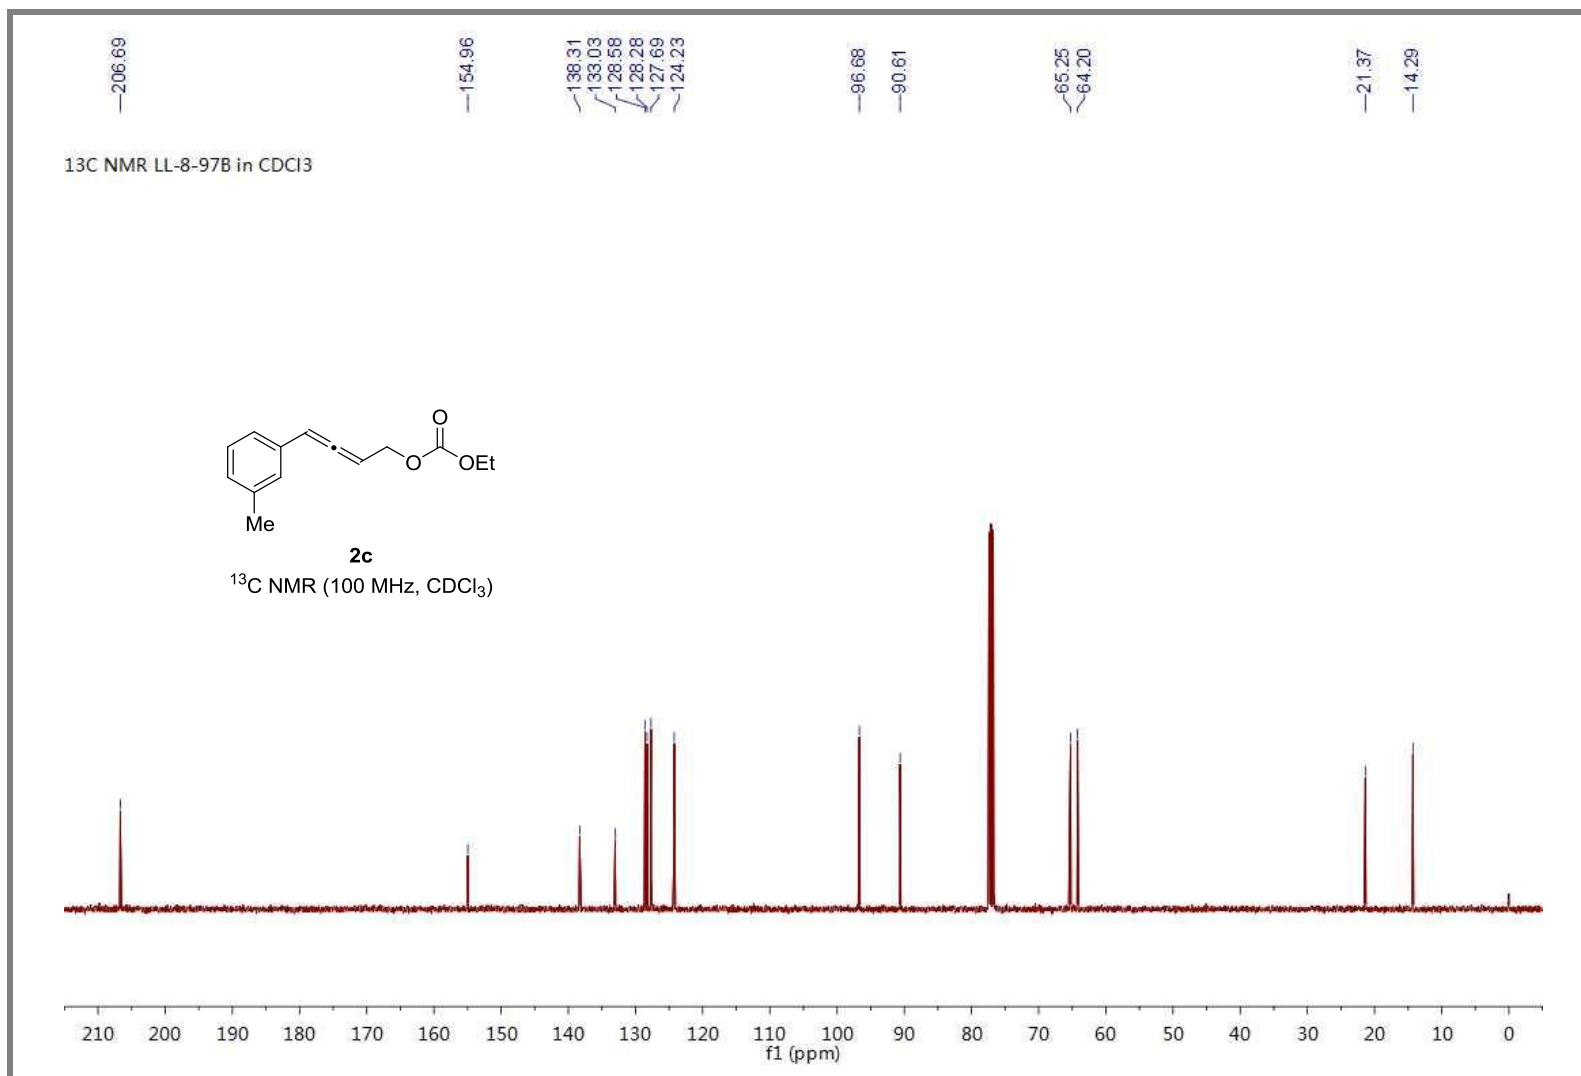

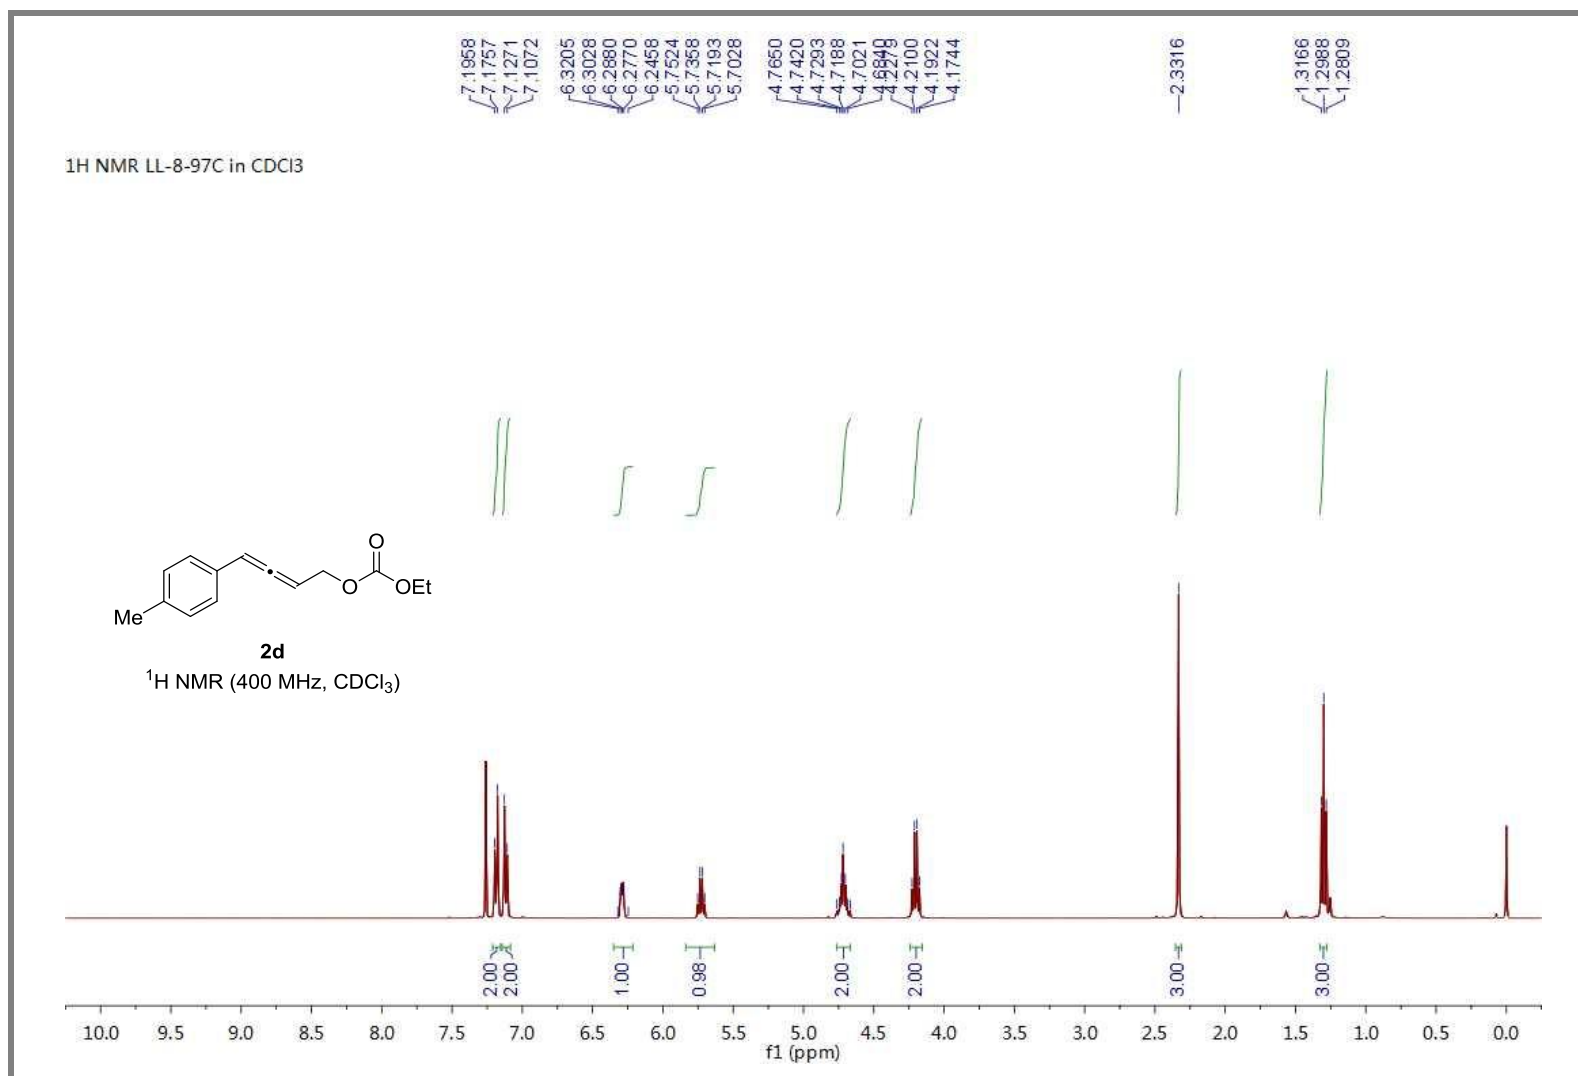

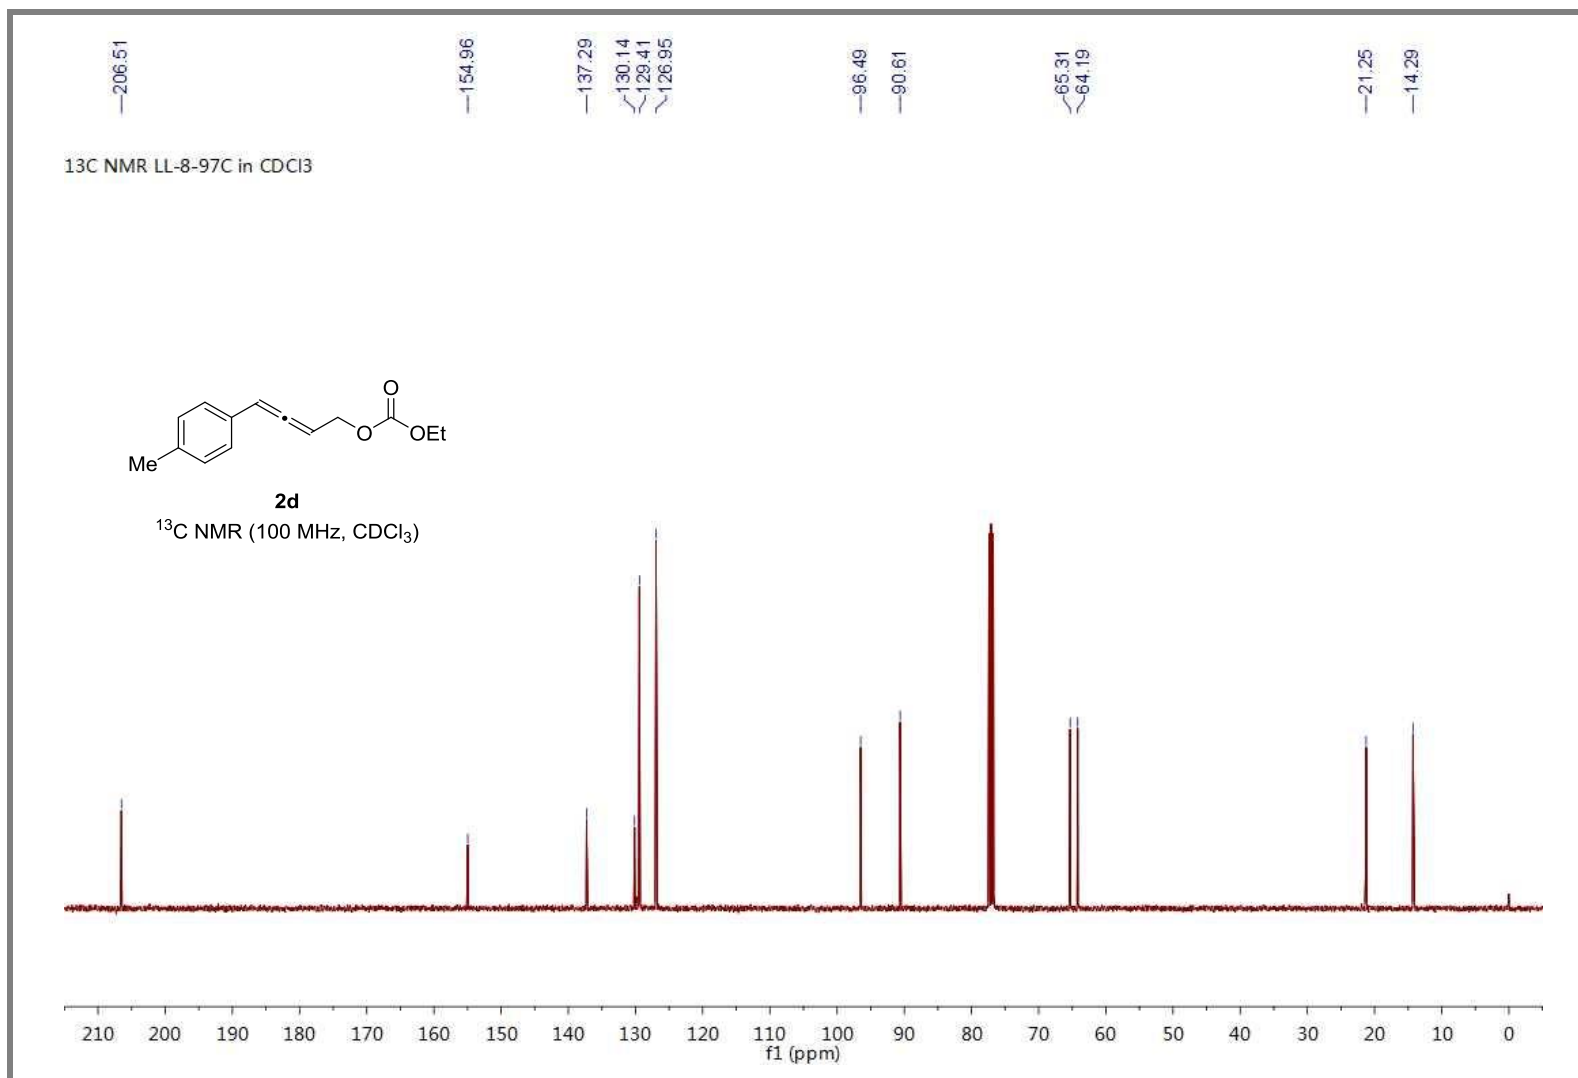

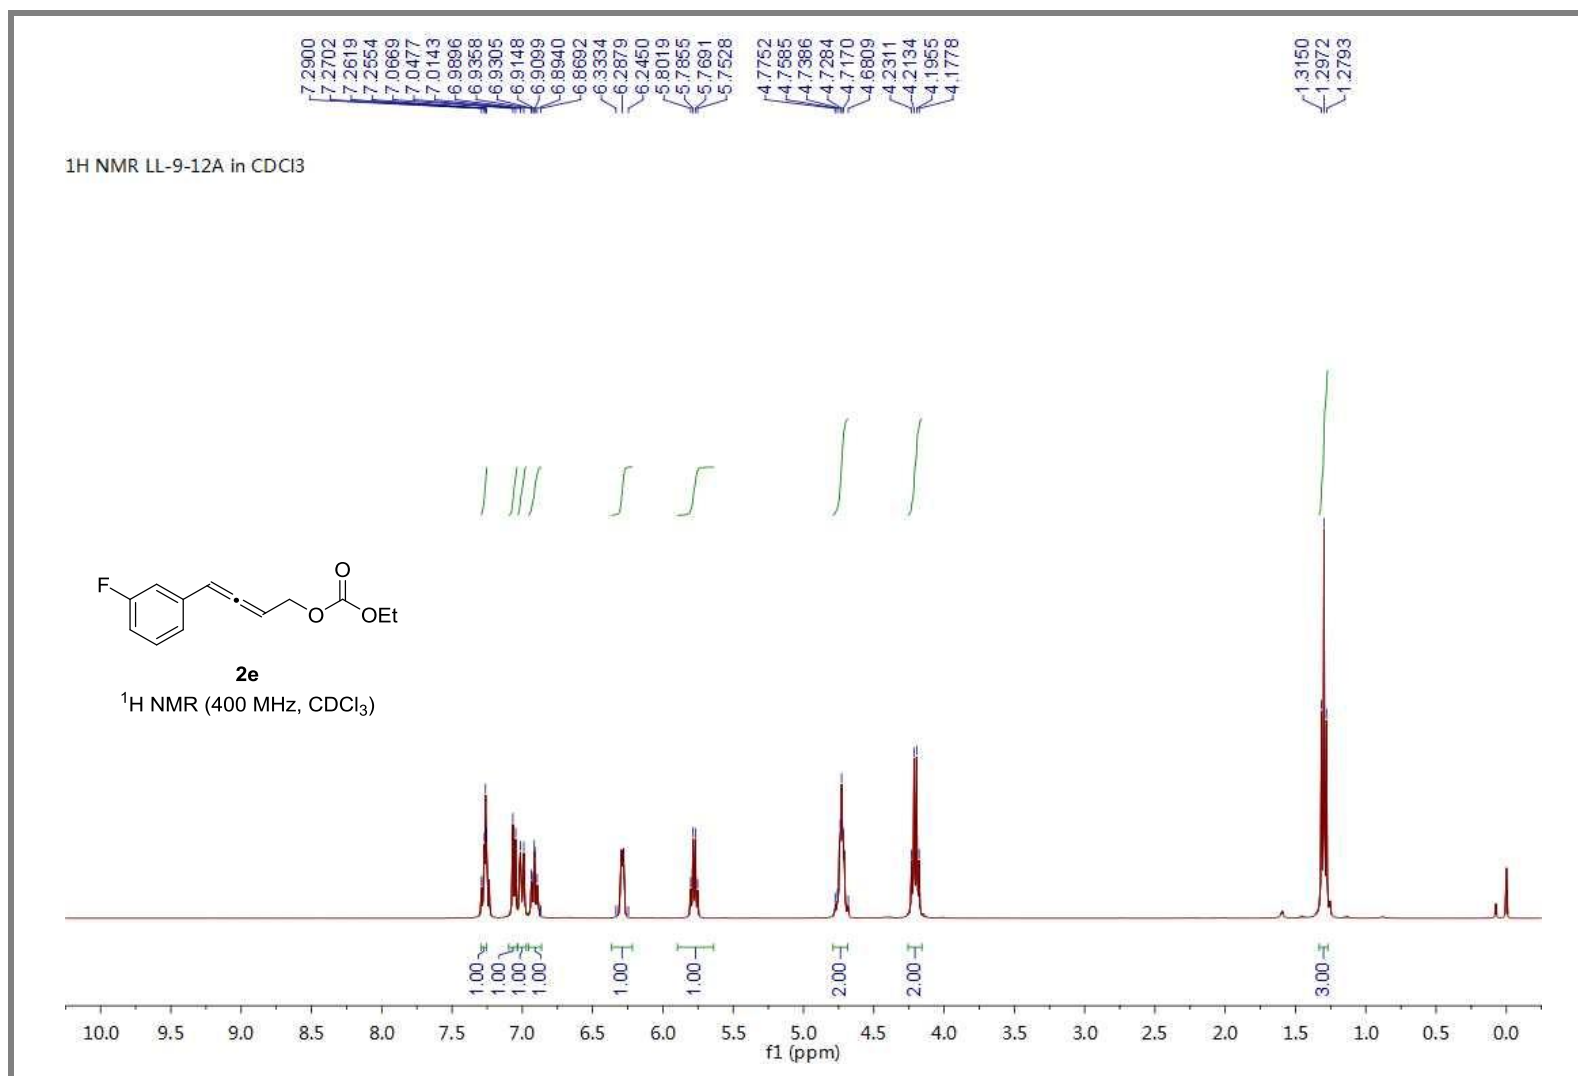

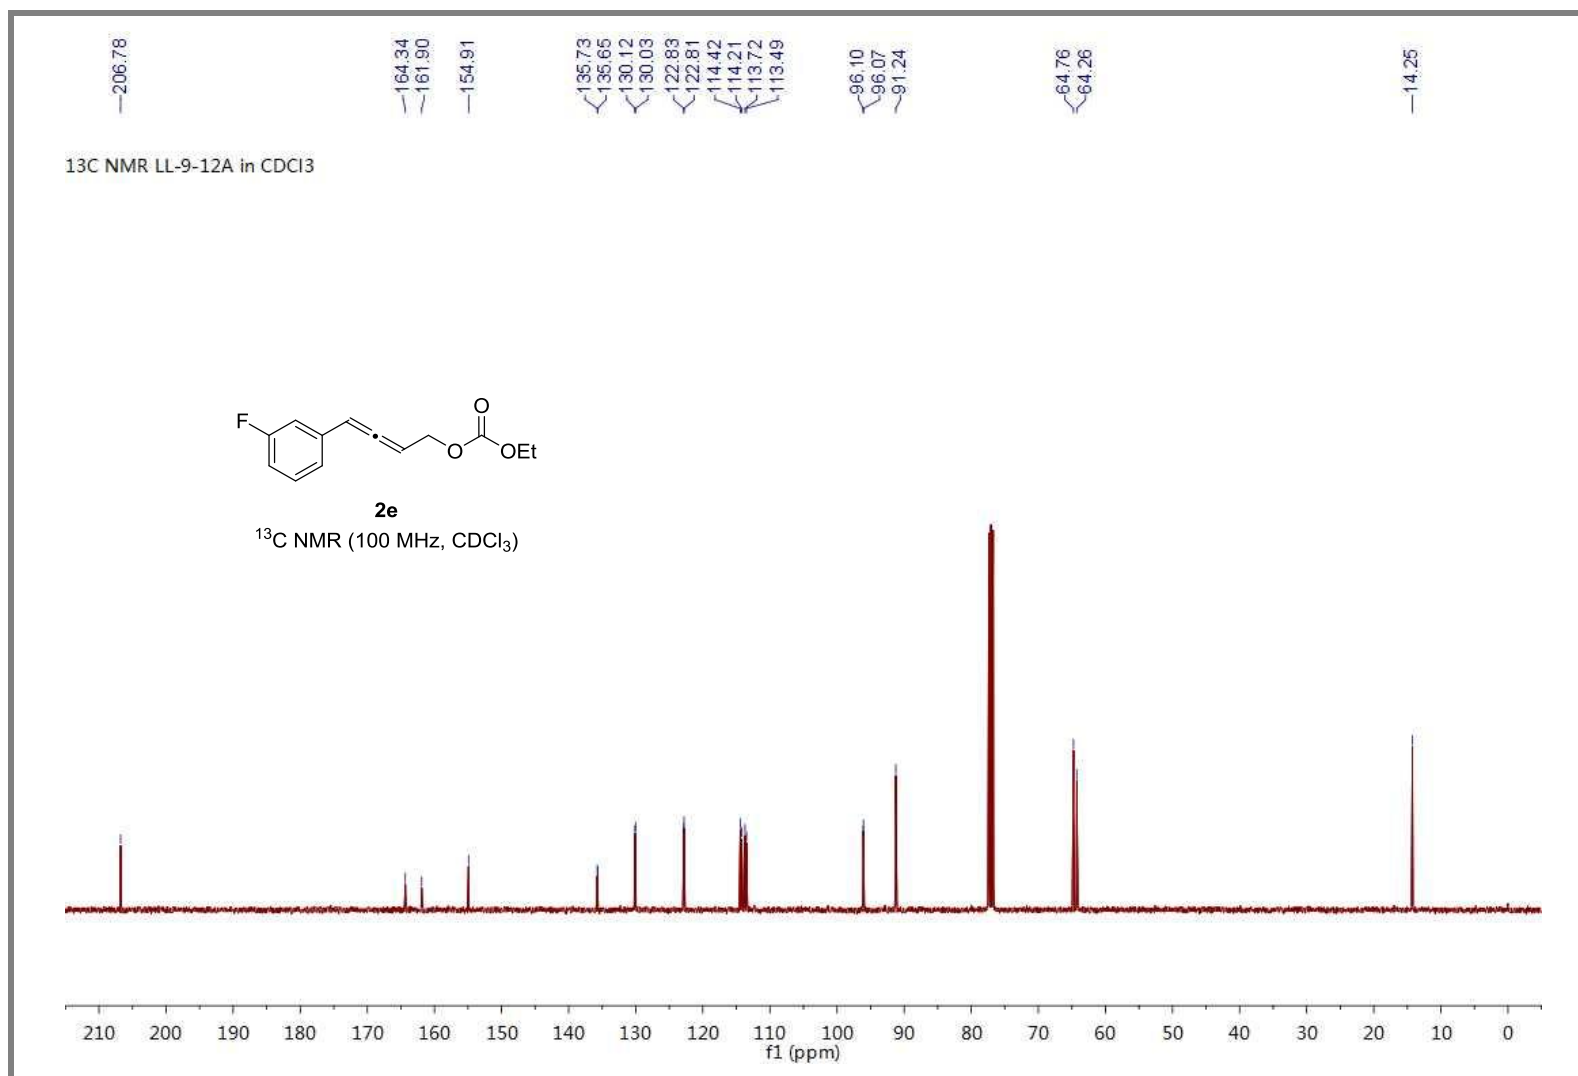

<sup>19</sup>F NMR LL-9-12A in CDCl<sub>3</sub>

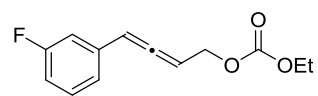

**2e**

<sup>19</sup>F NMR (376 MHz, CDCl<sub>3</sub>)

-113.3222

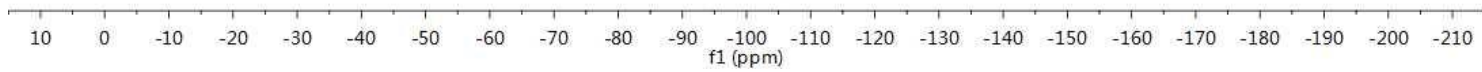

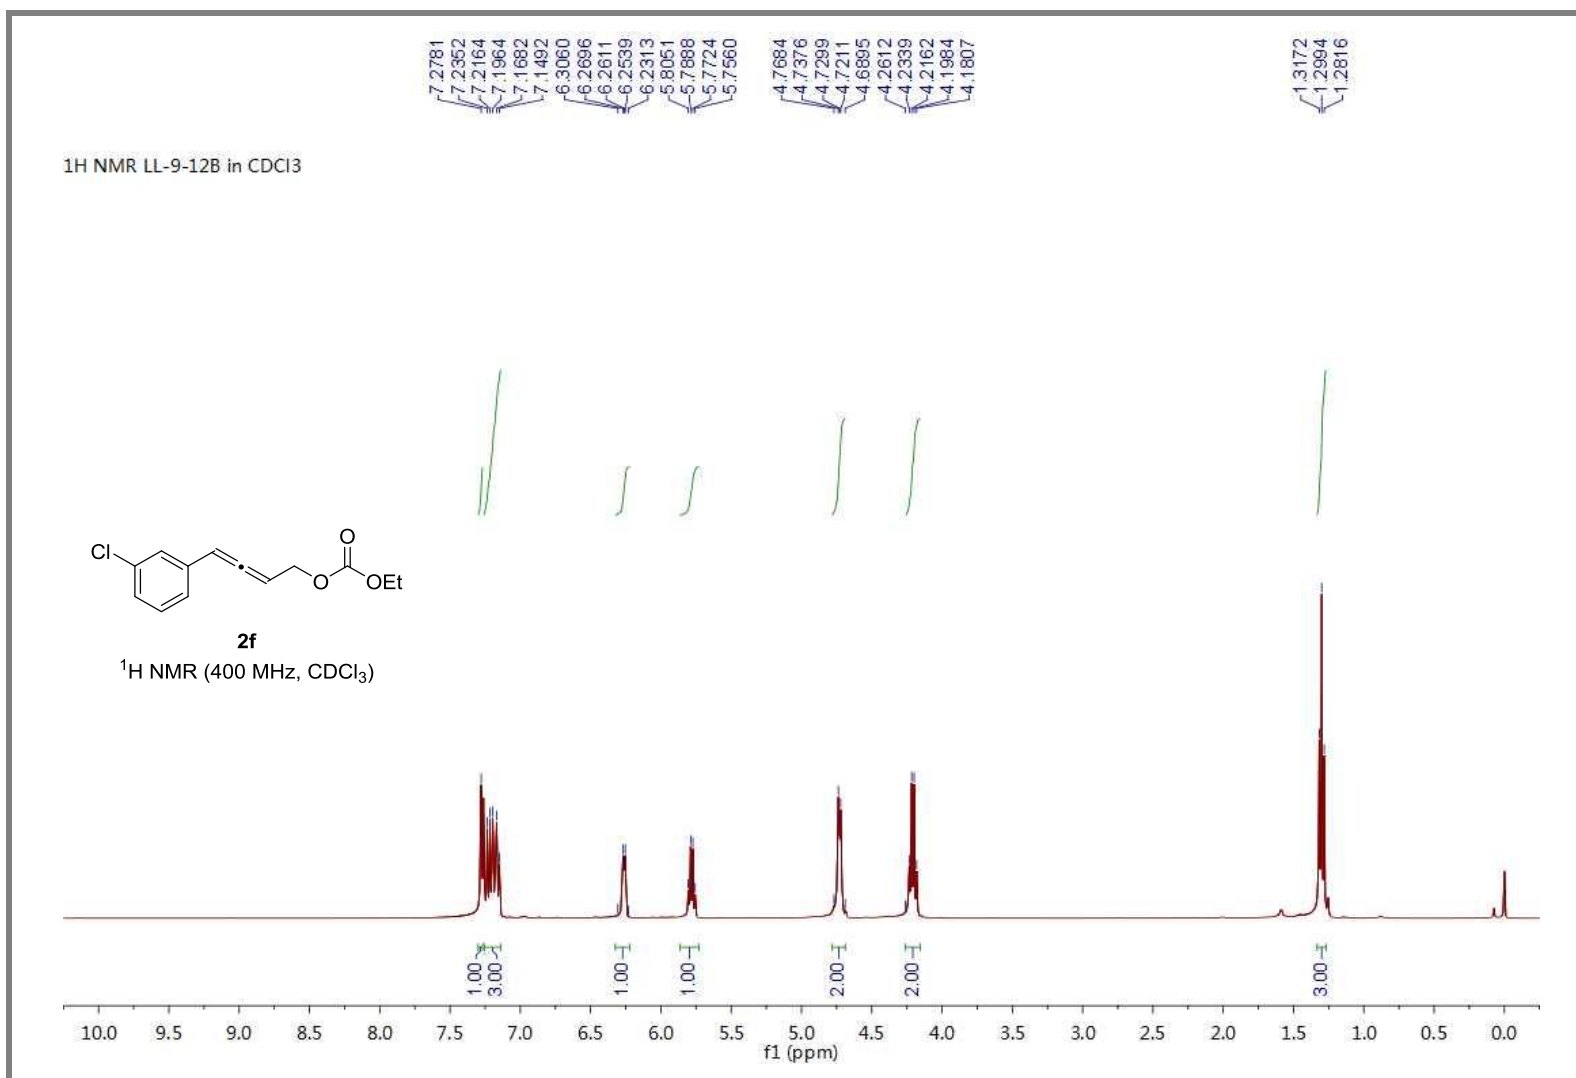

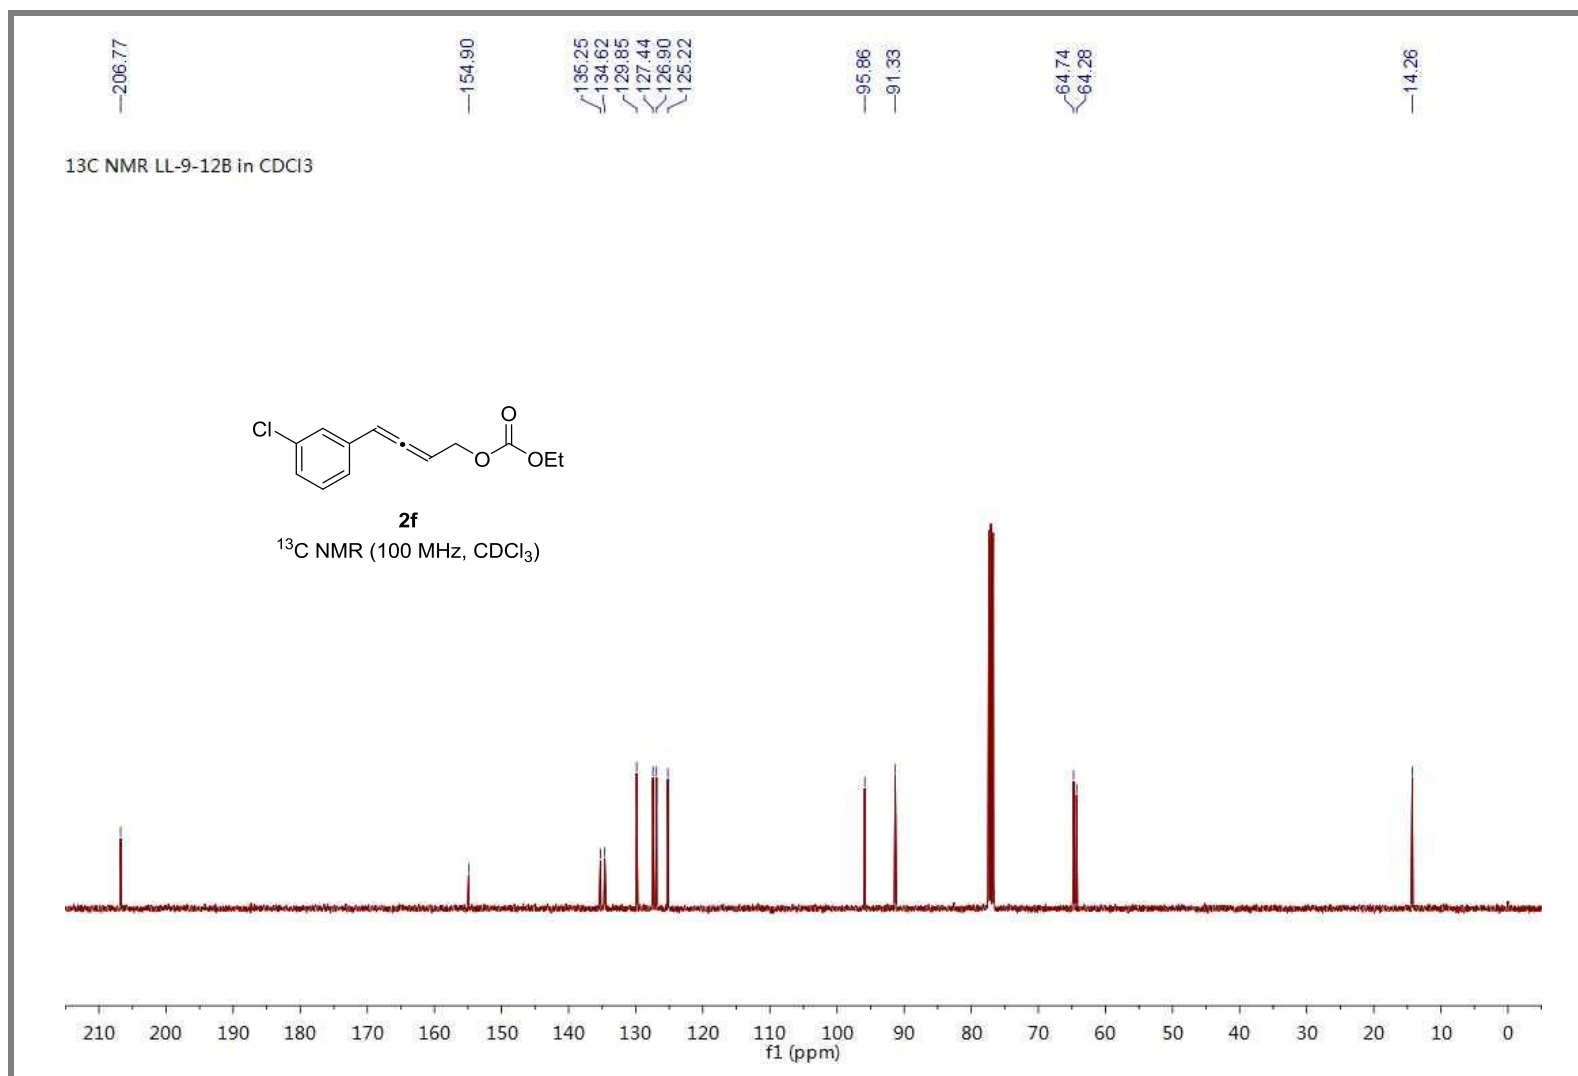



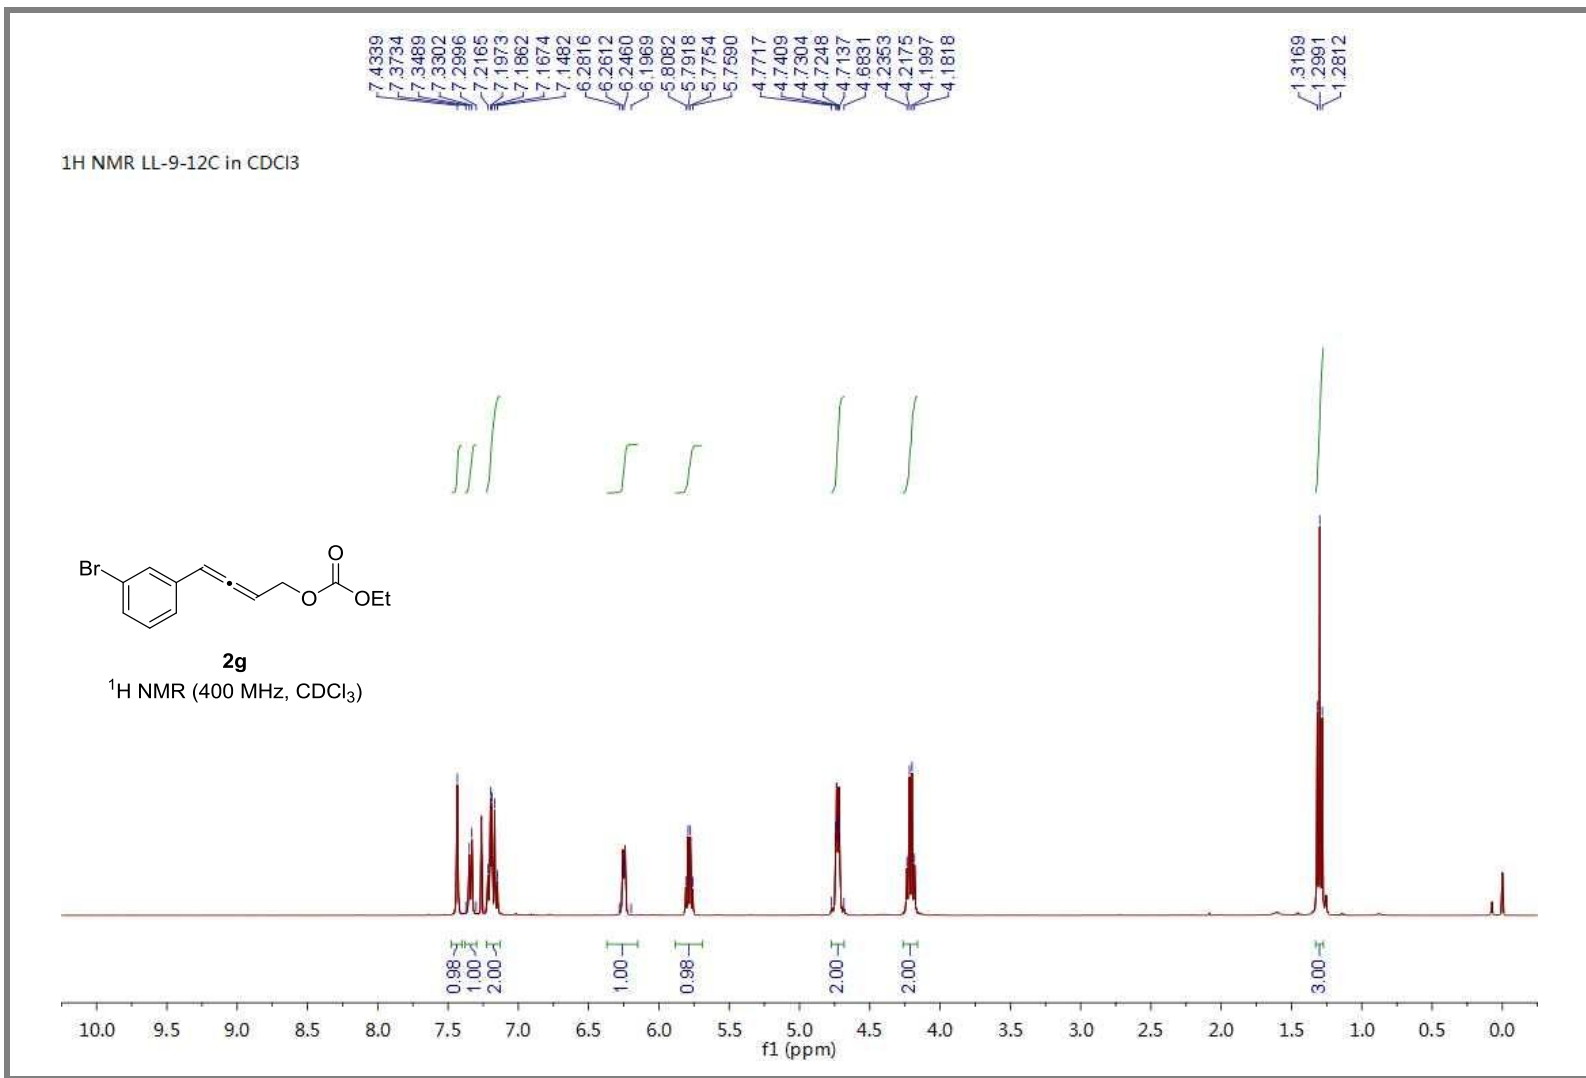

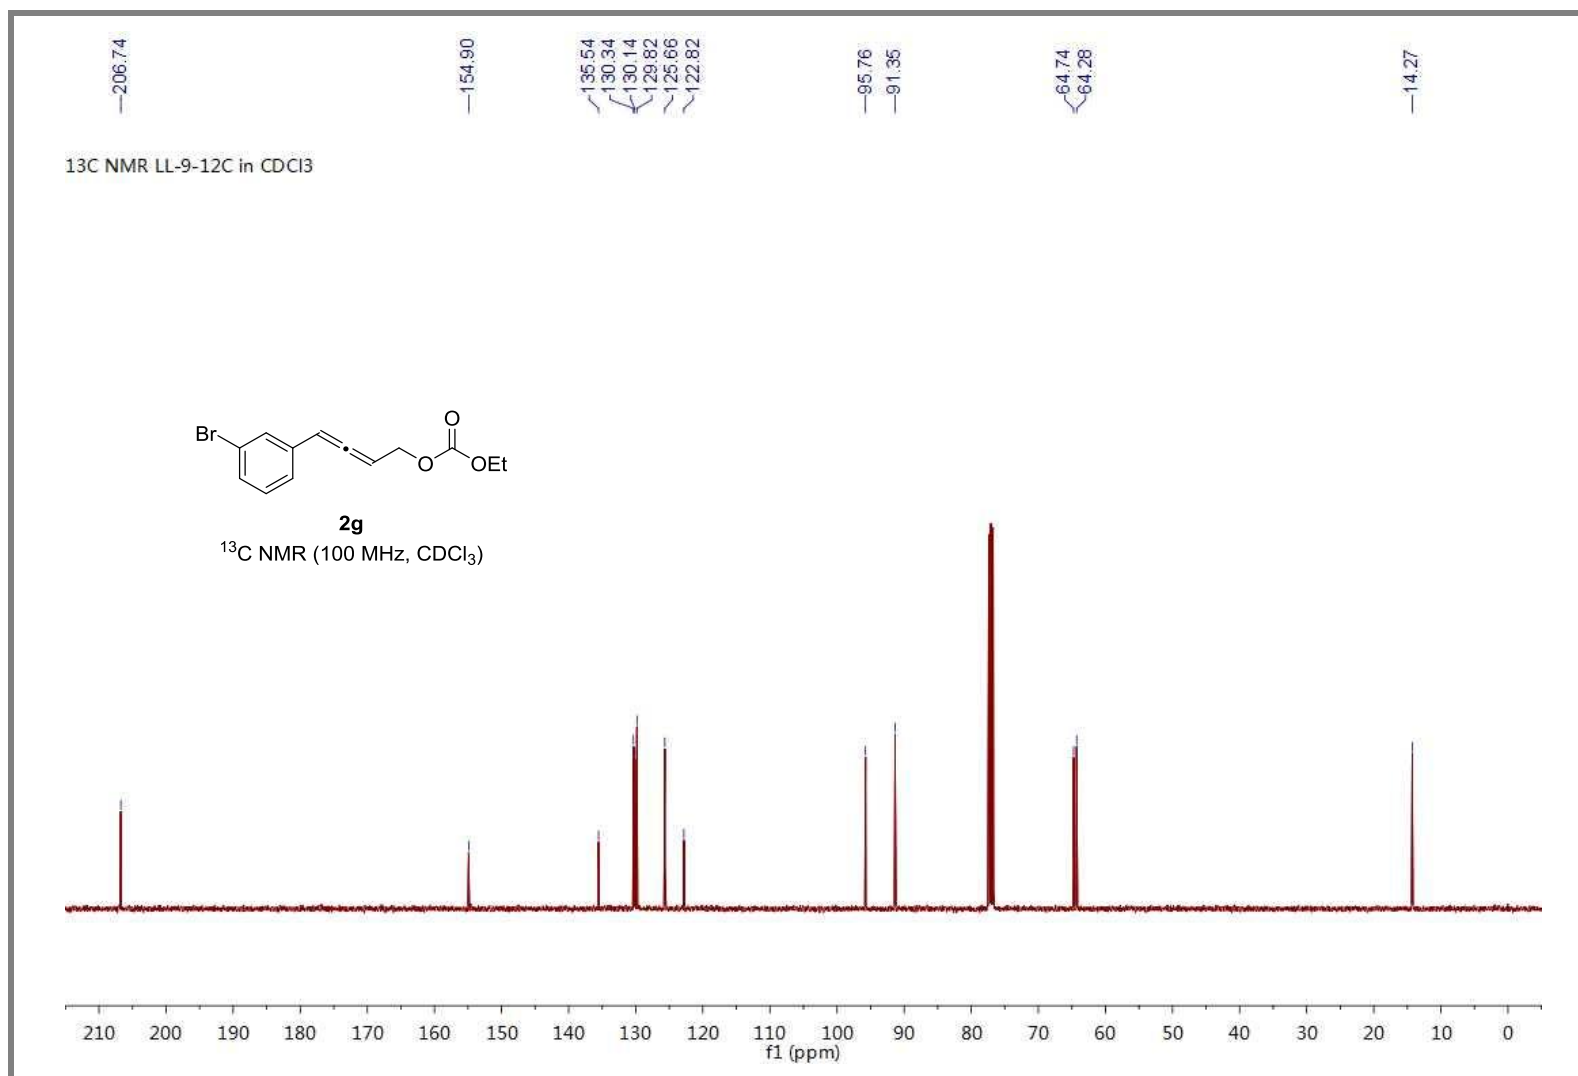

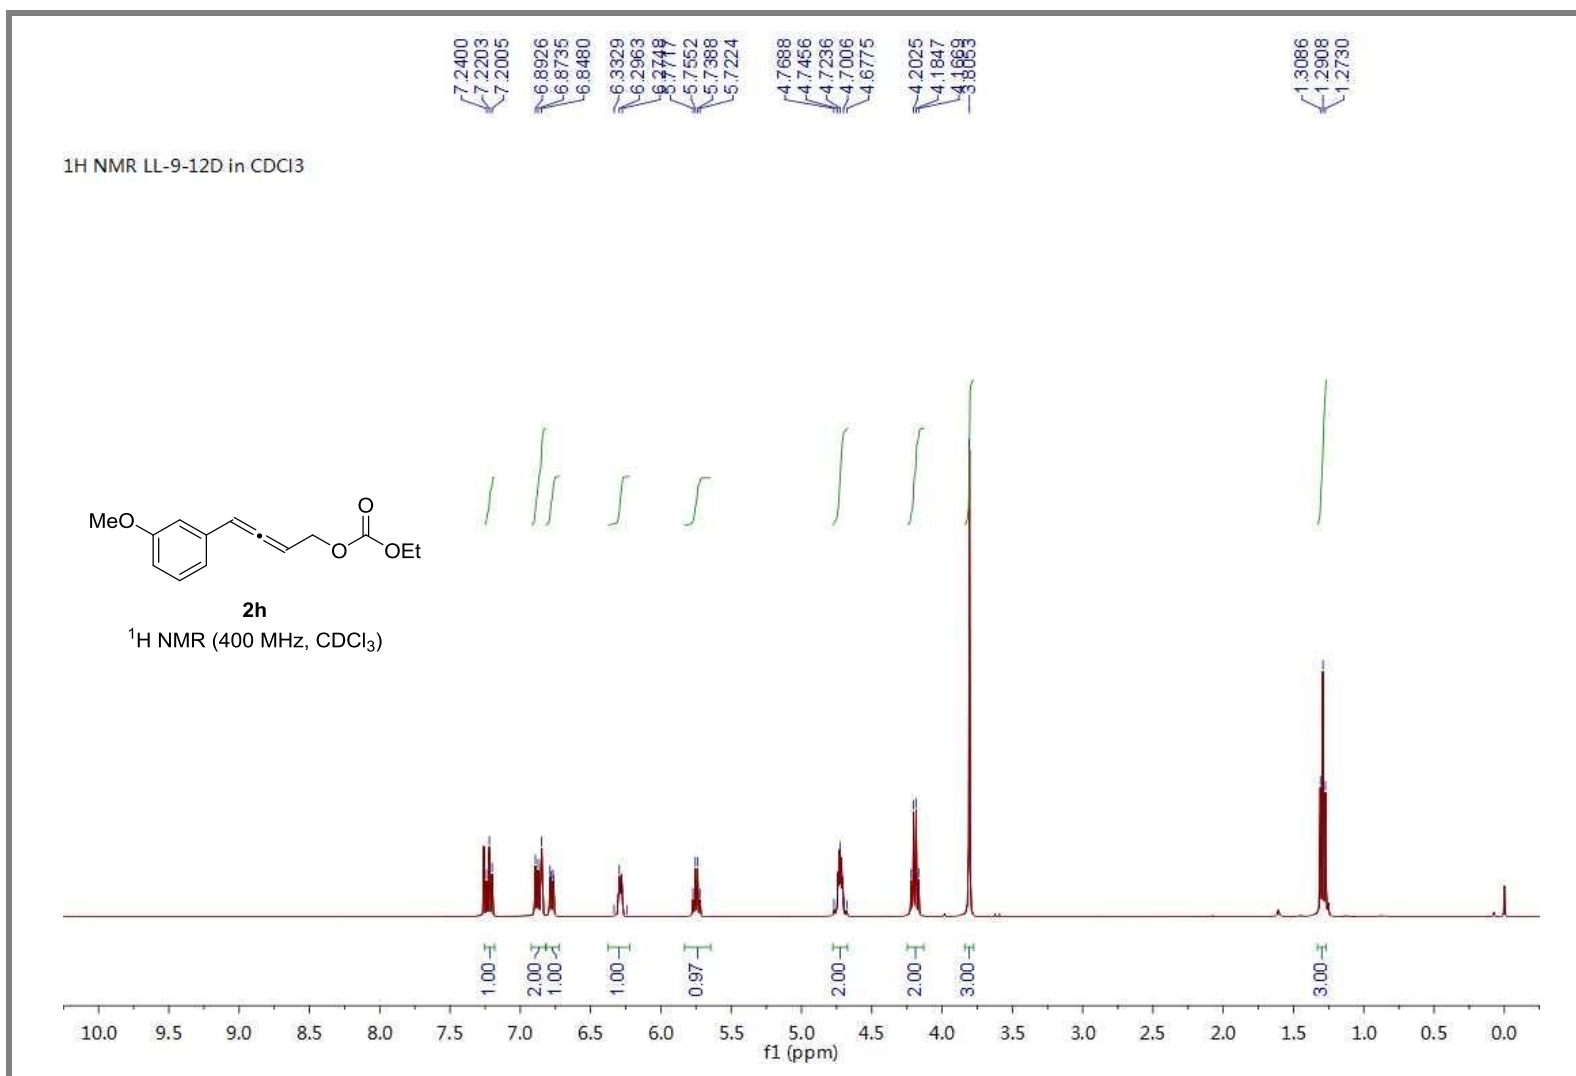

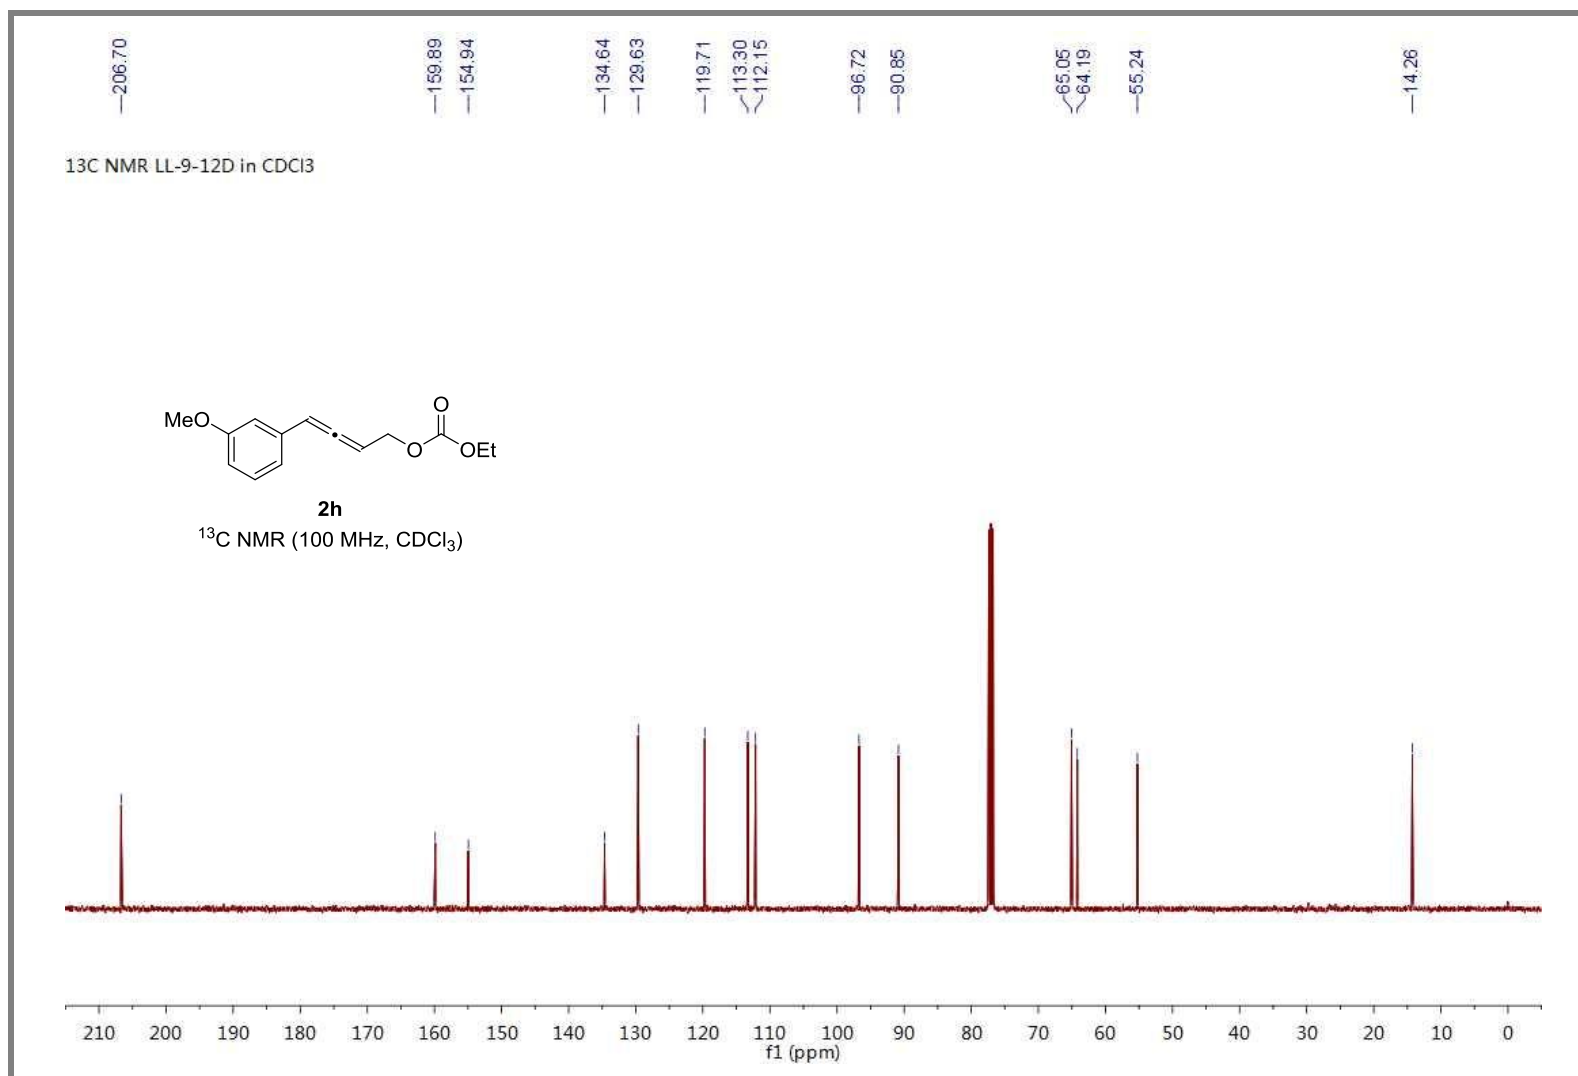

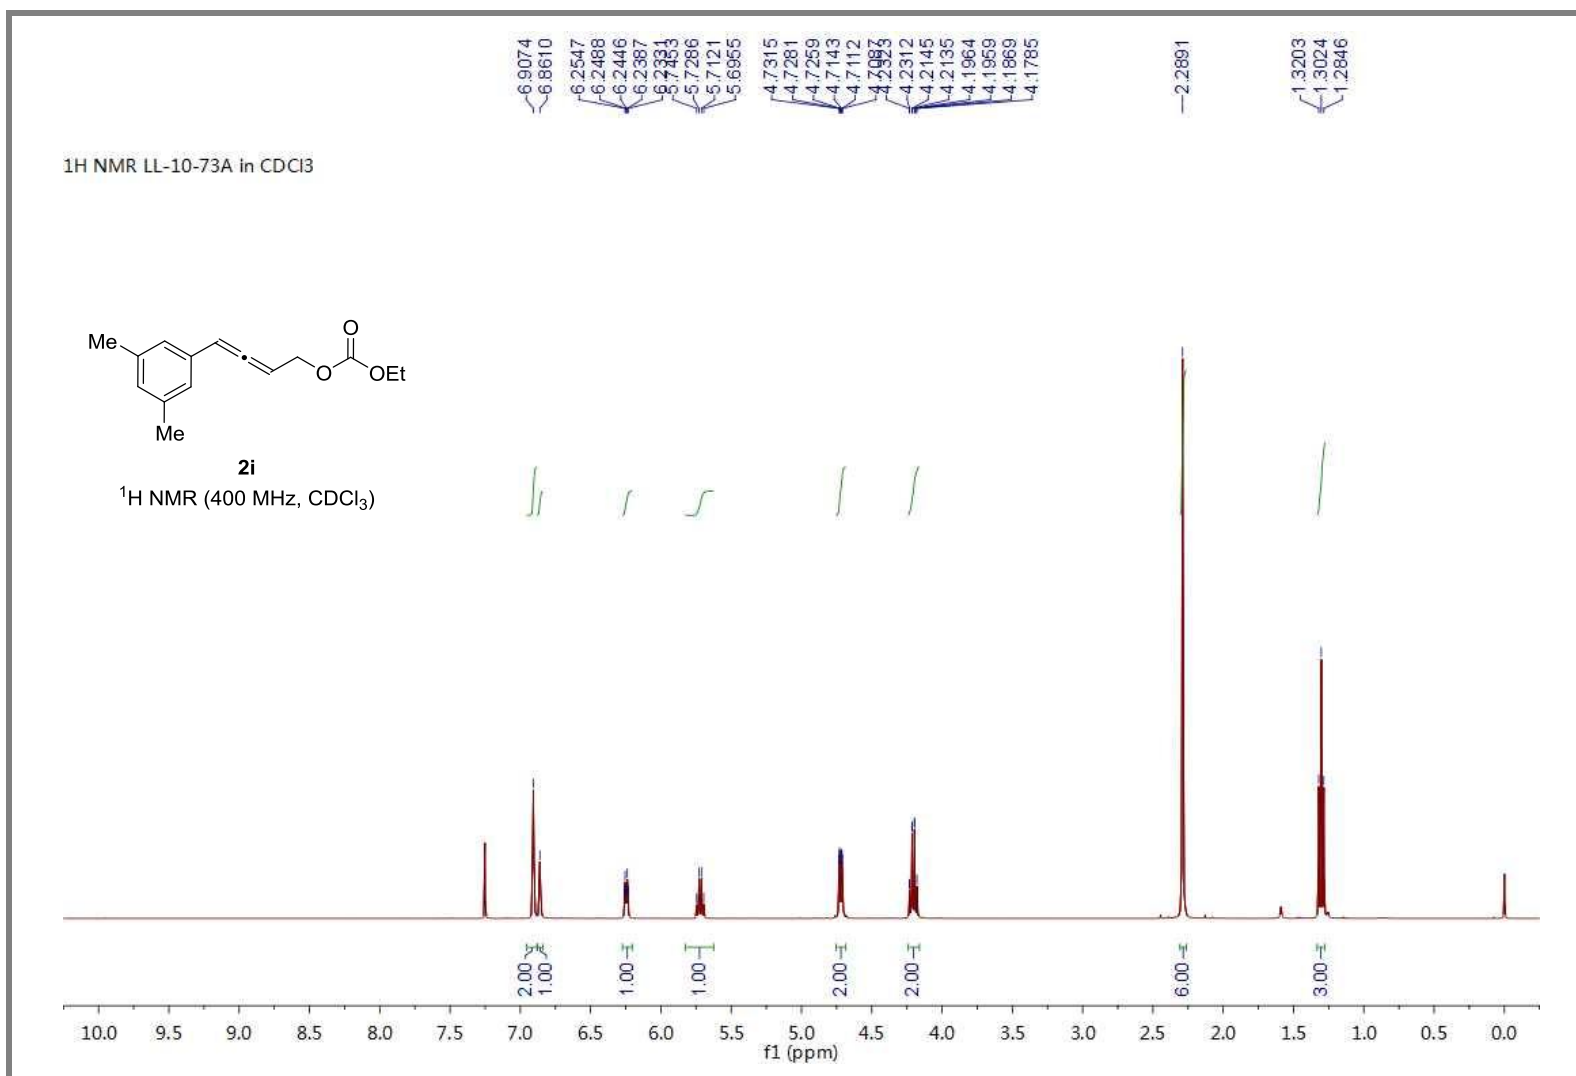

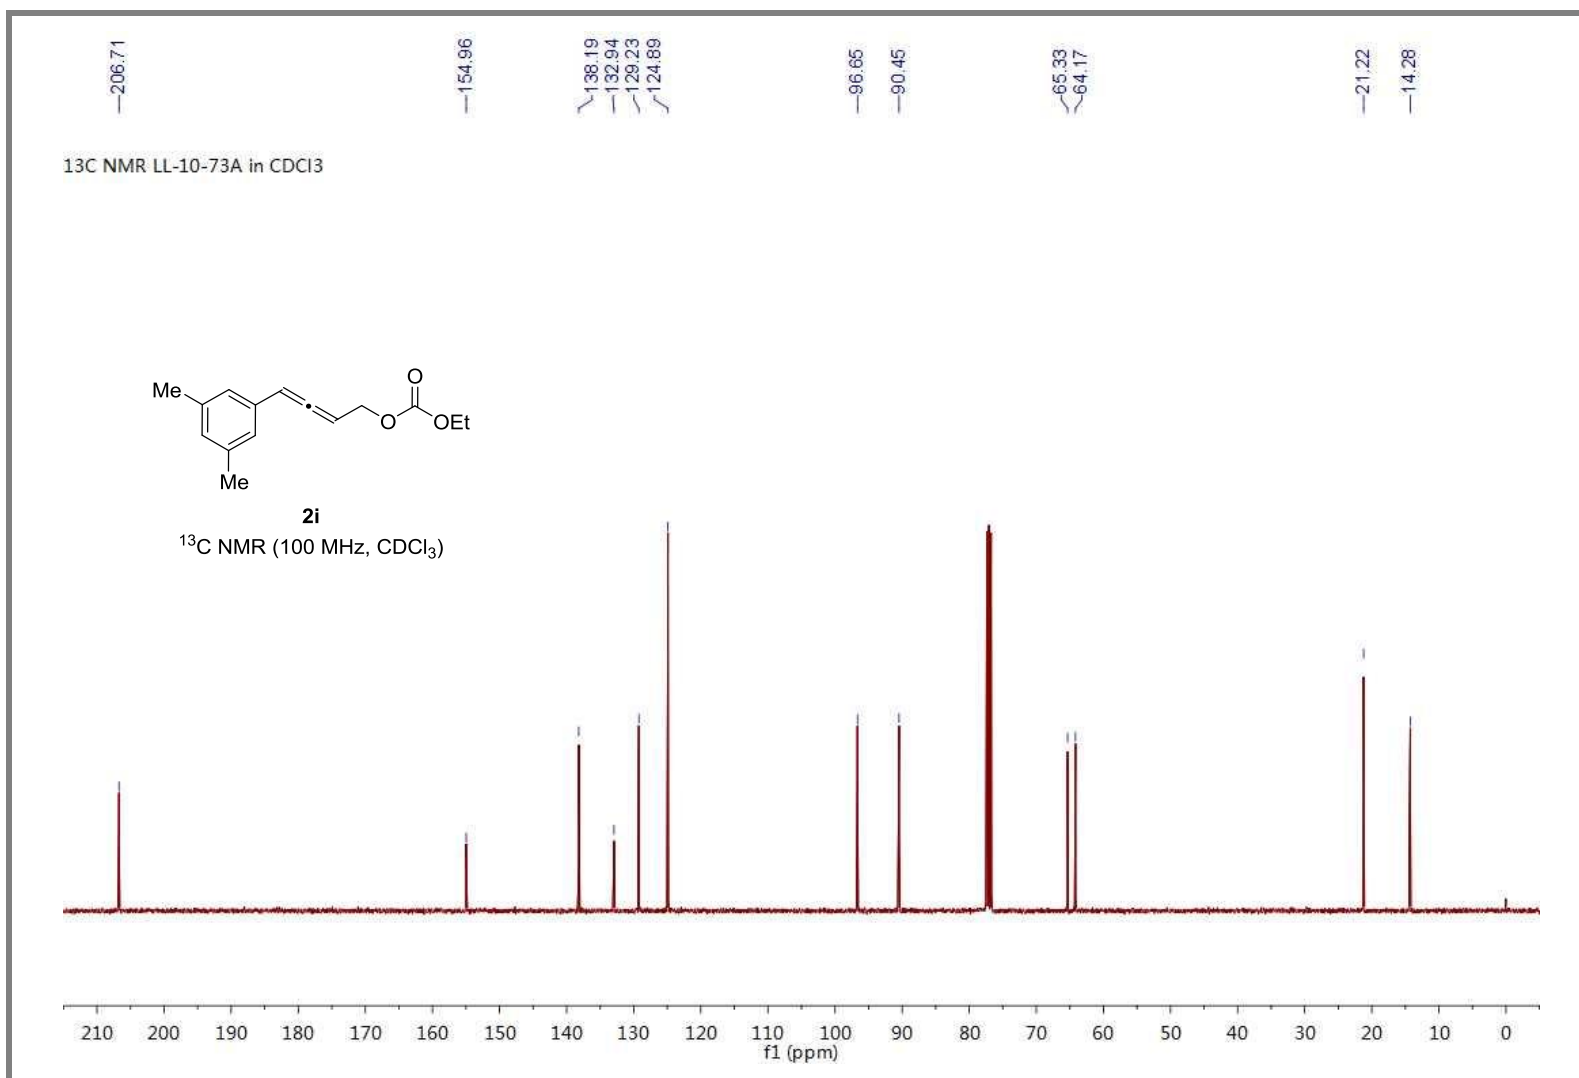

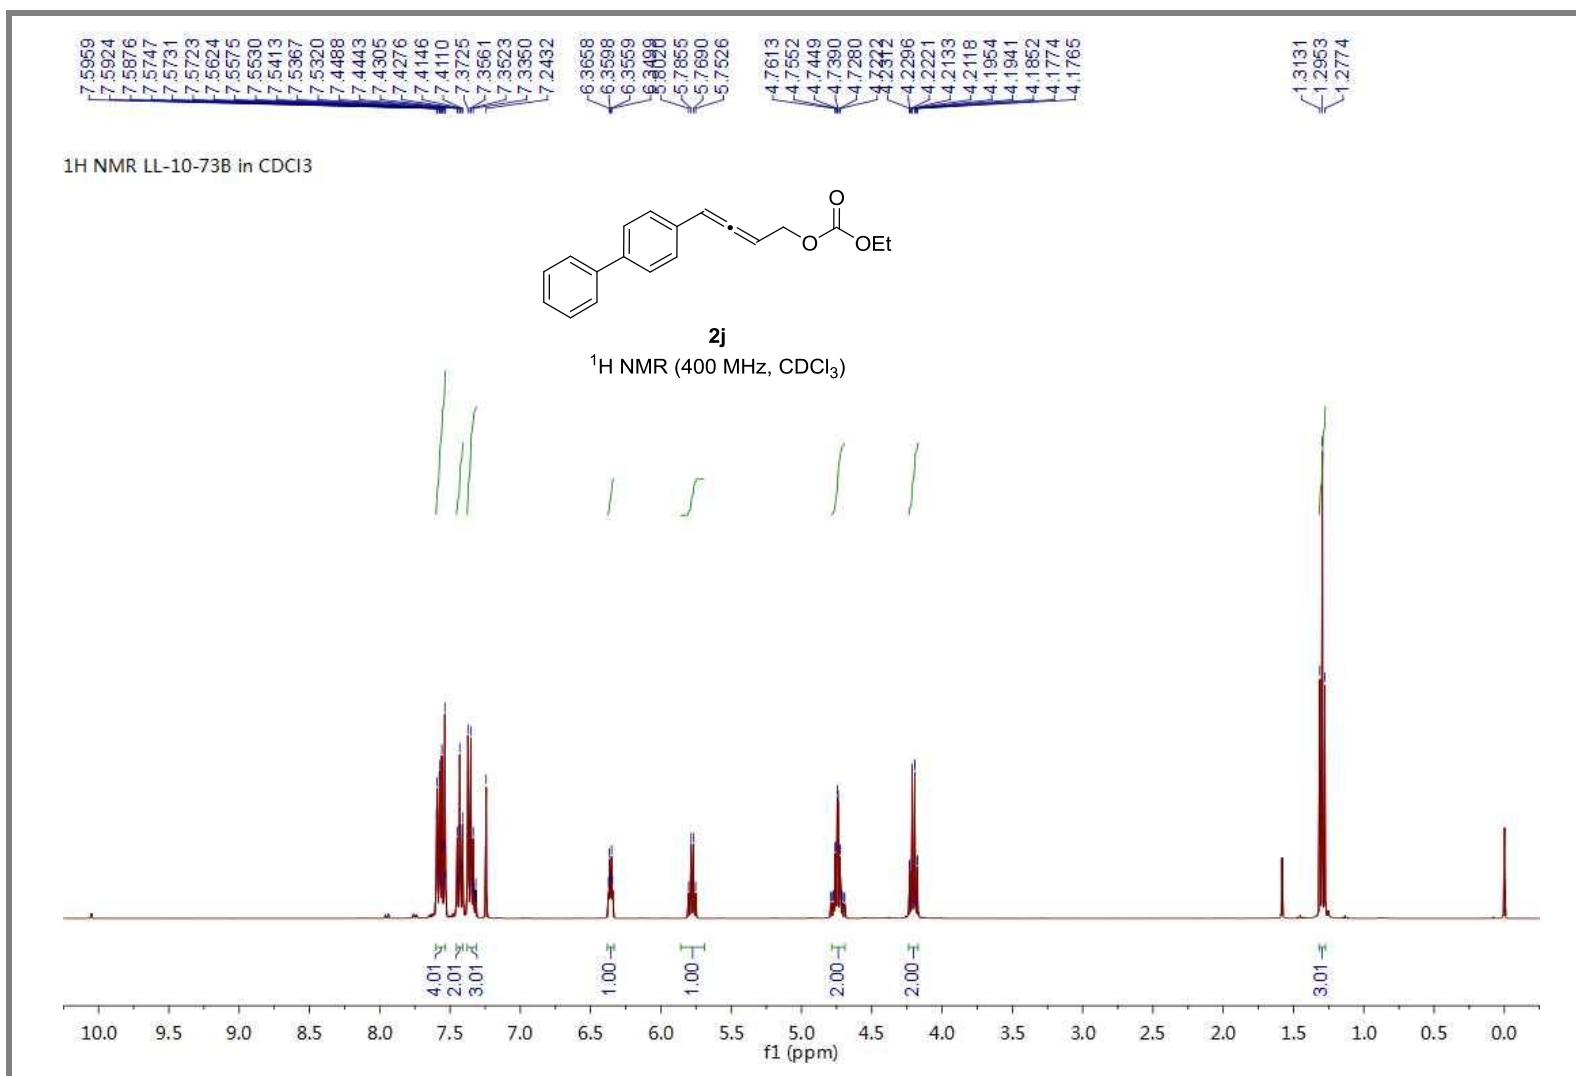

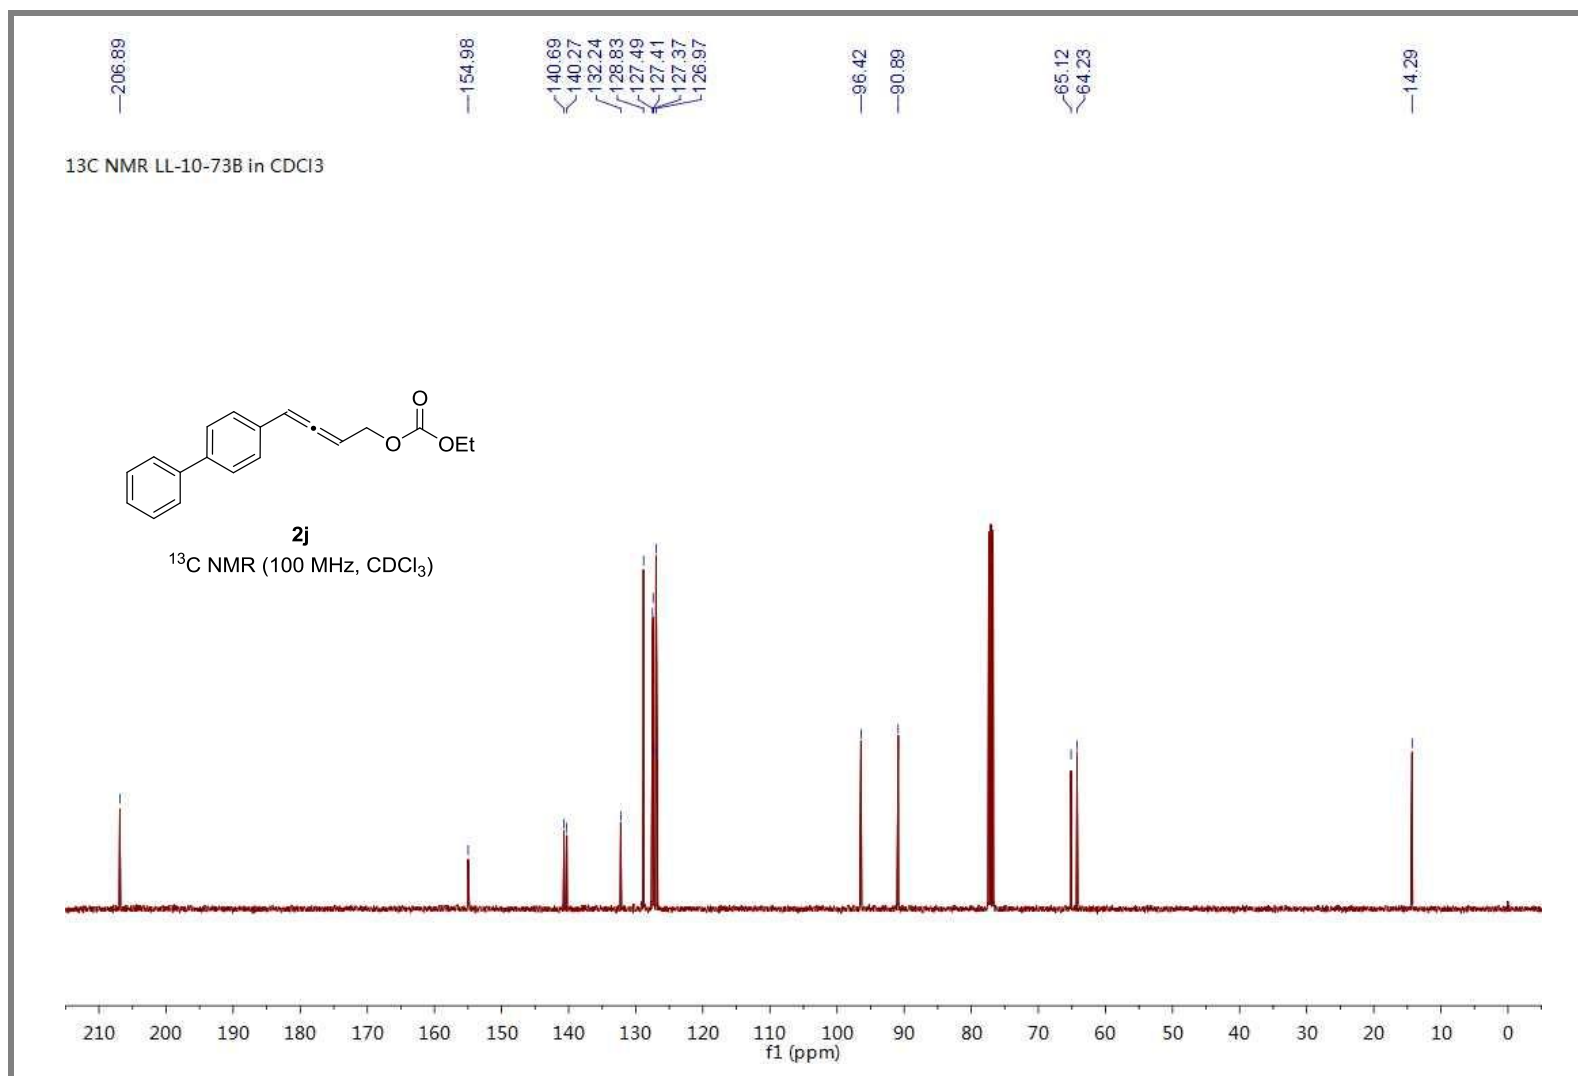



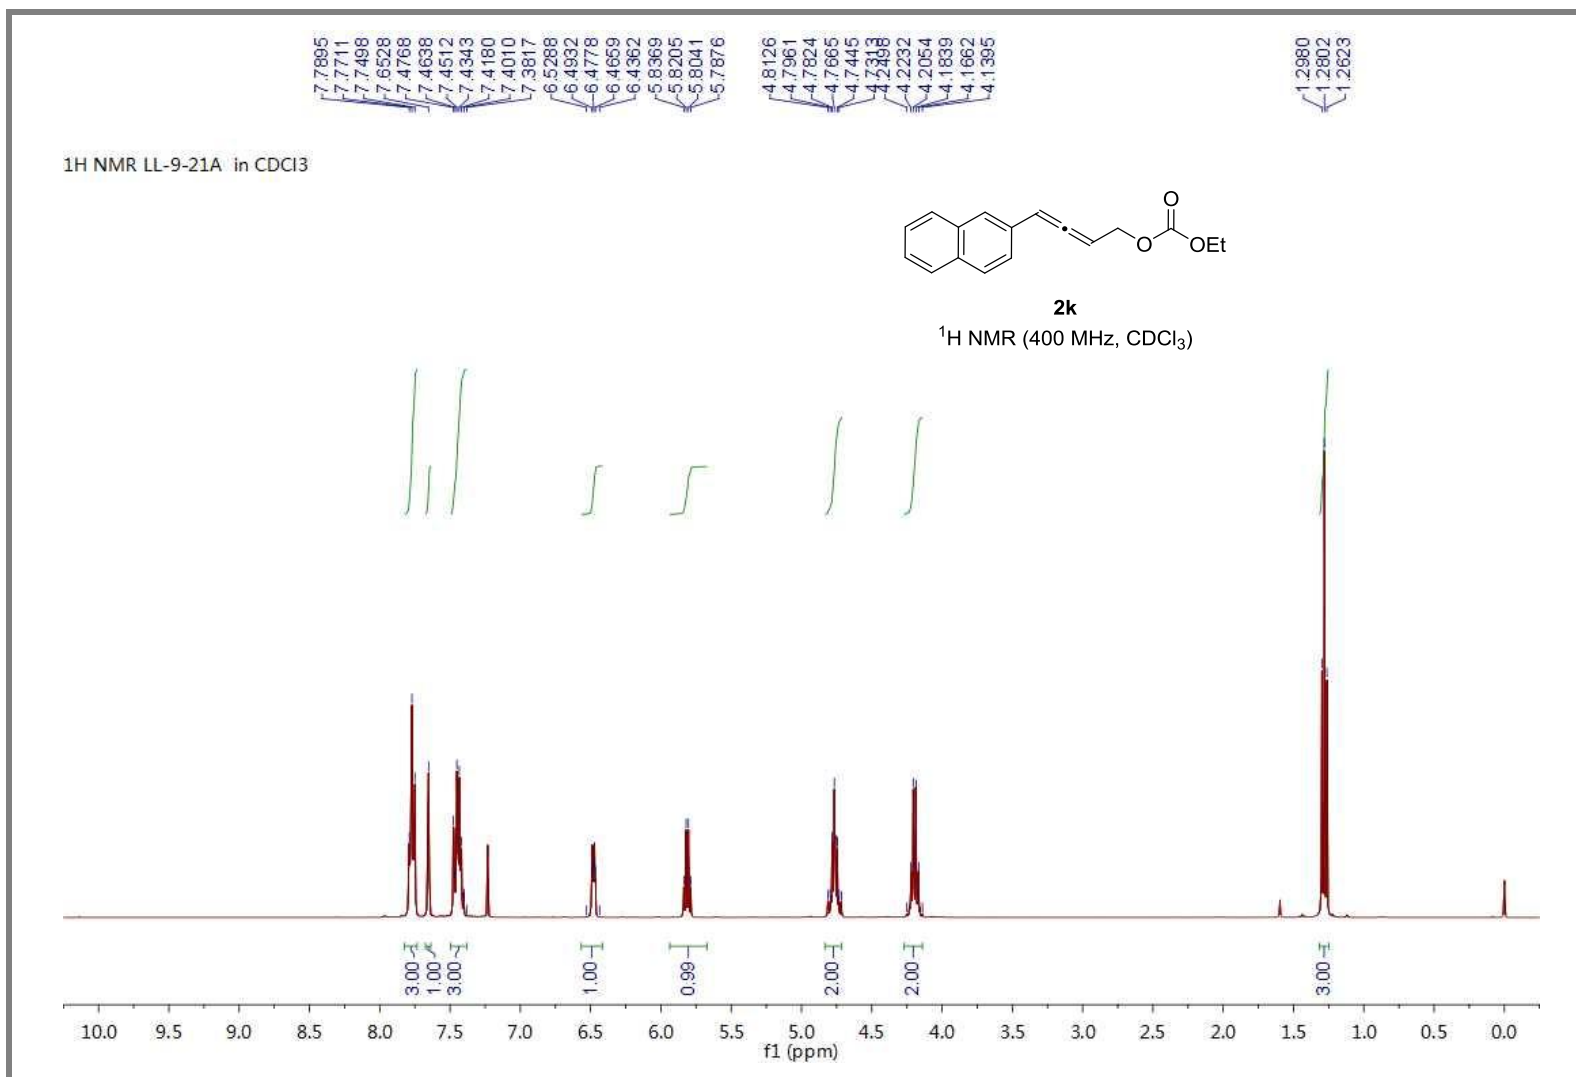

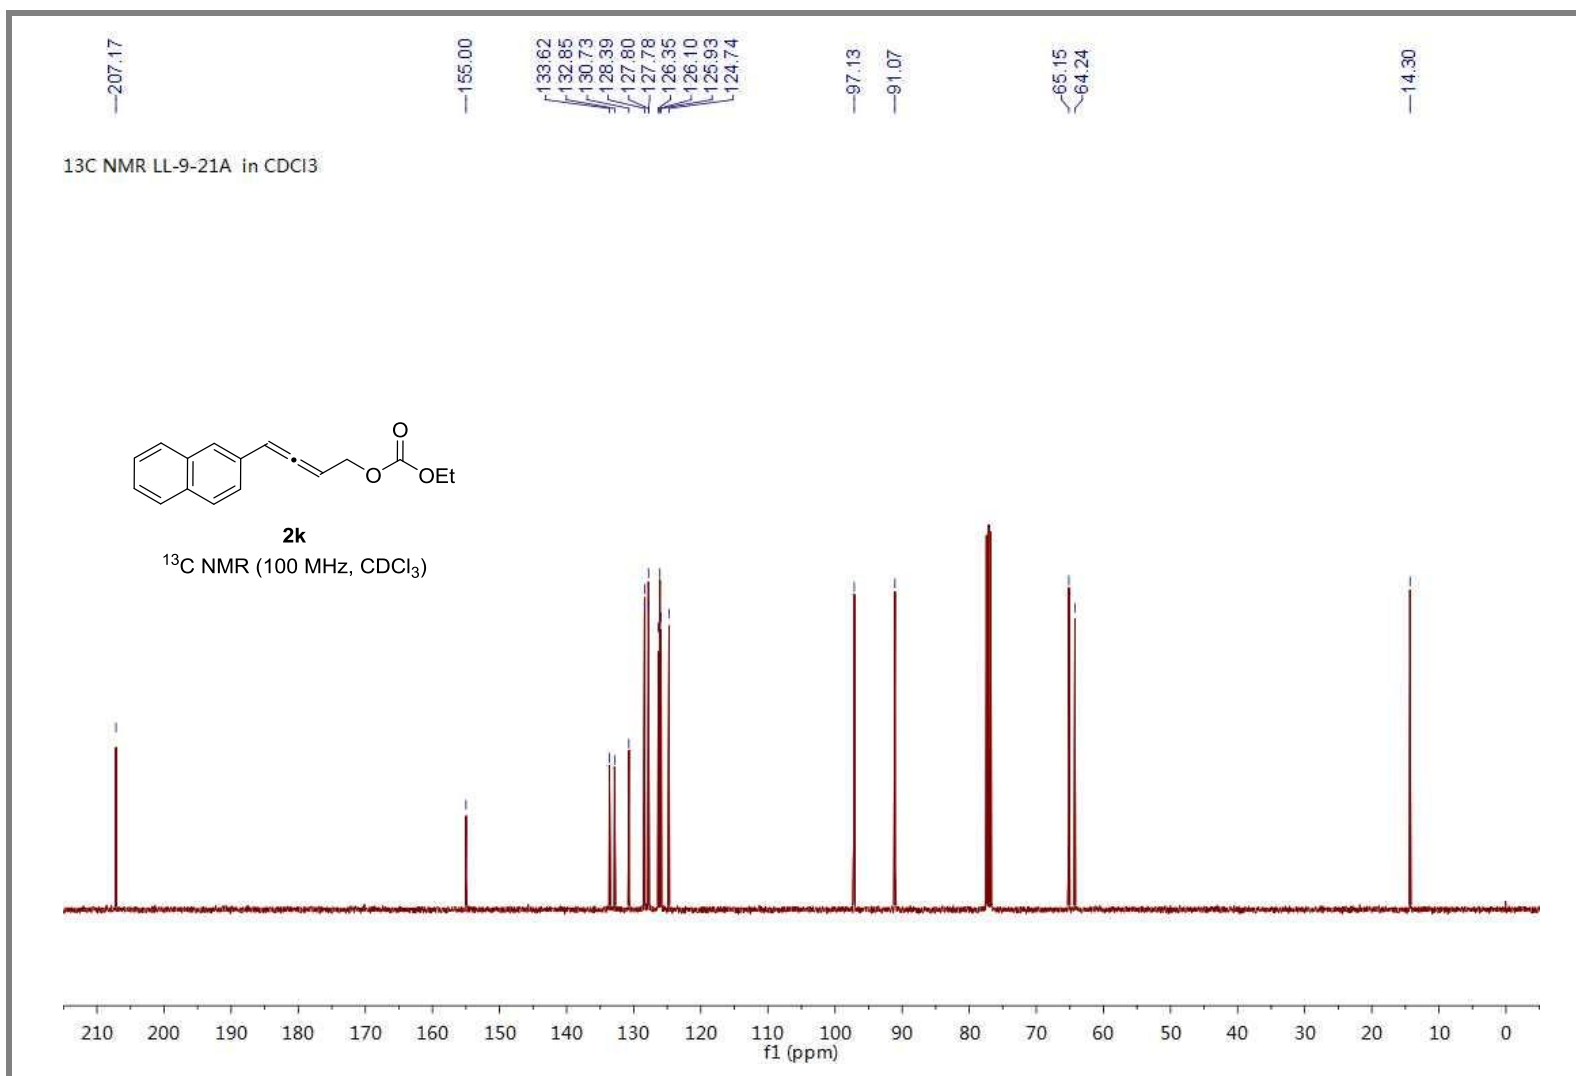

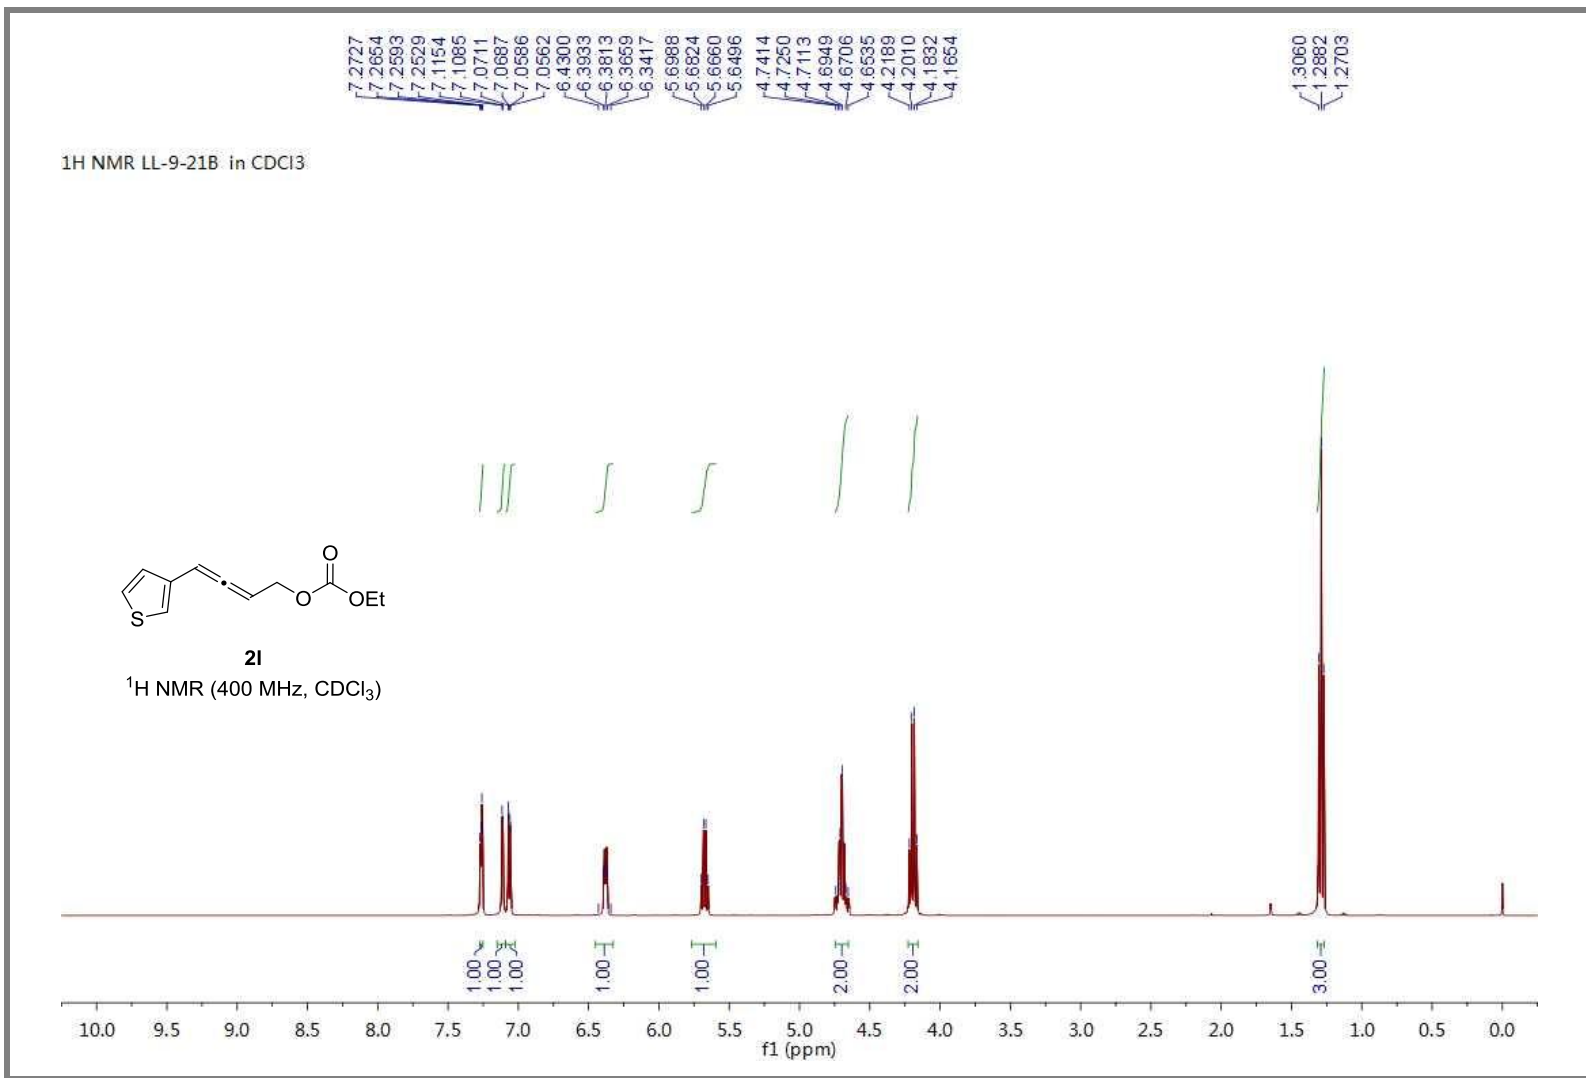

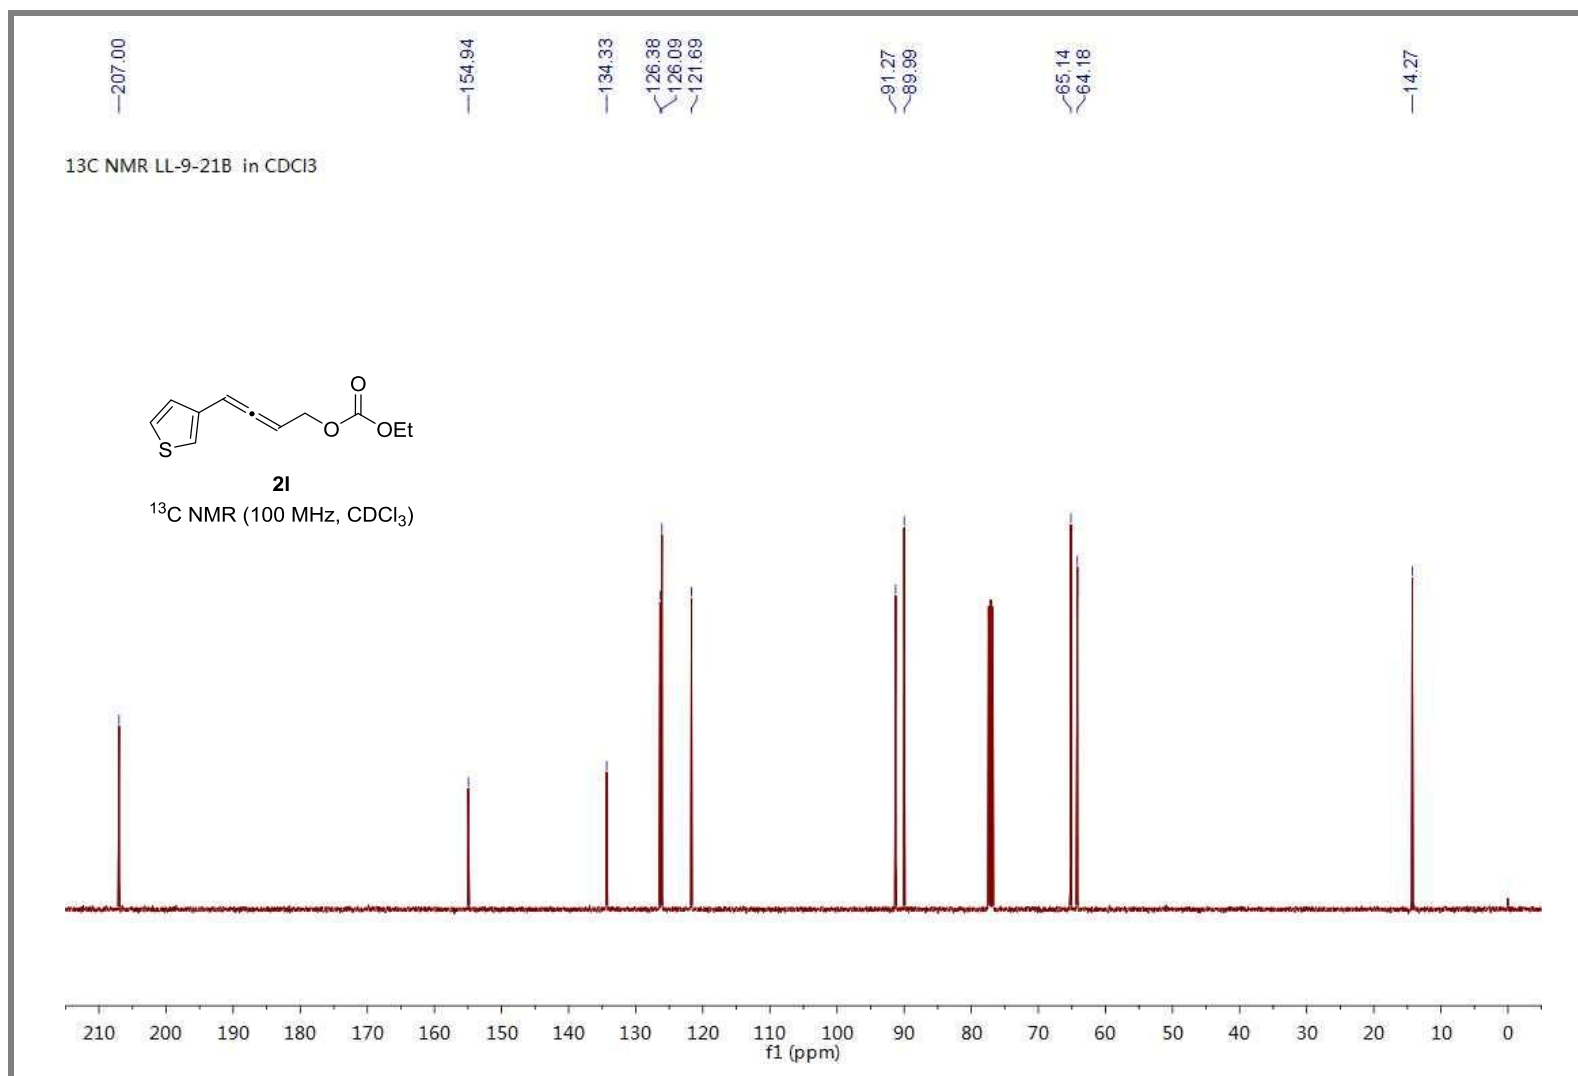

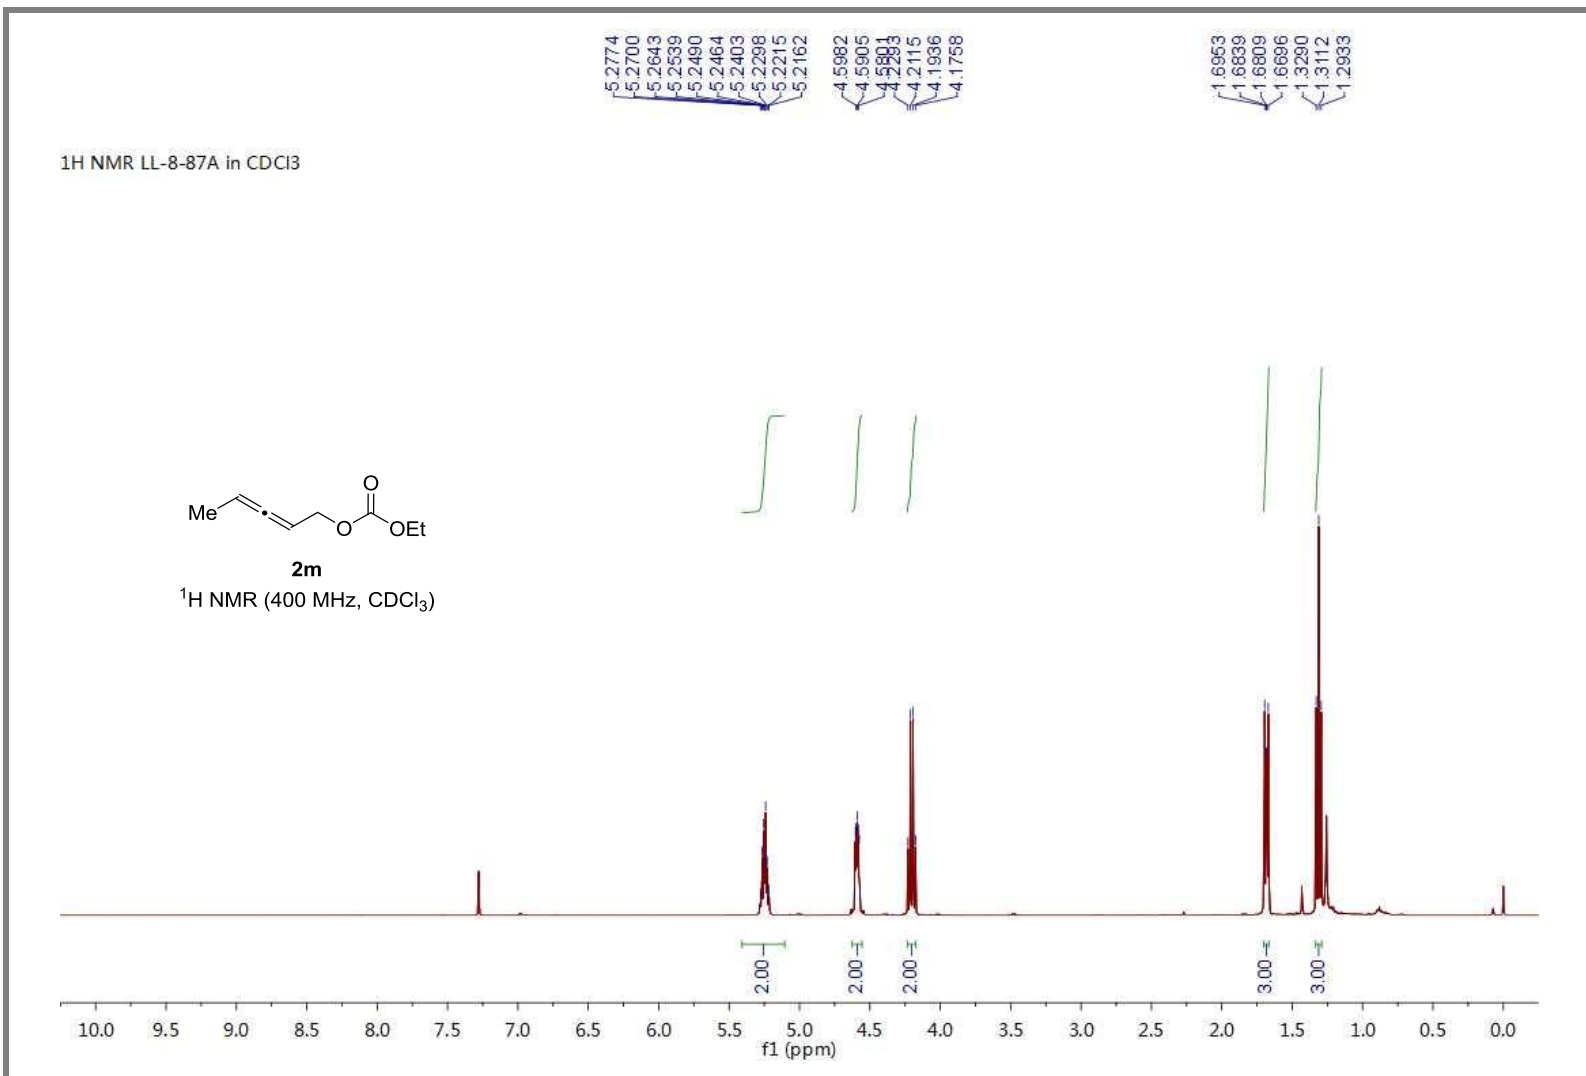

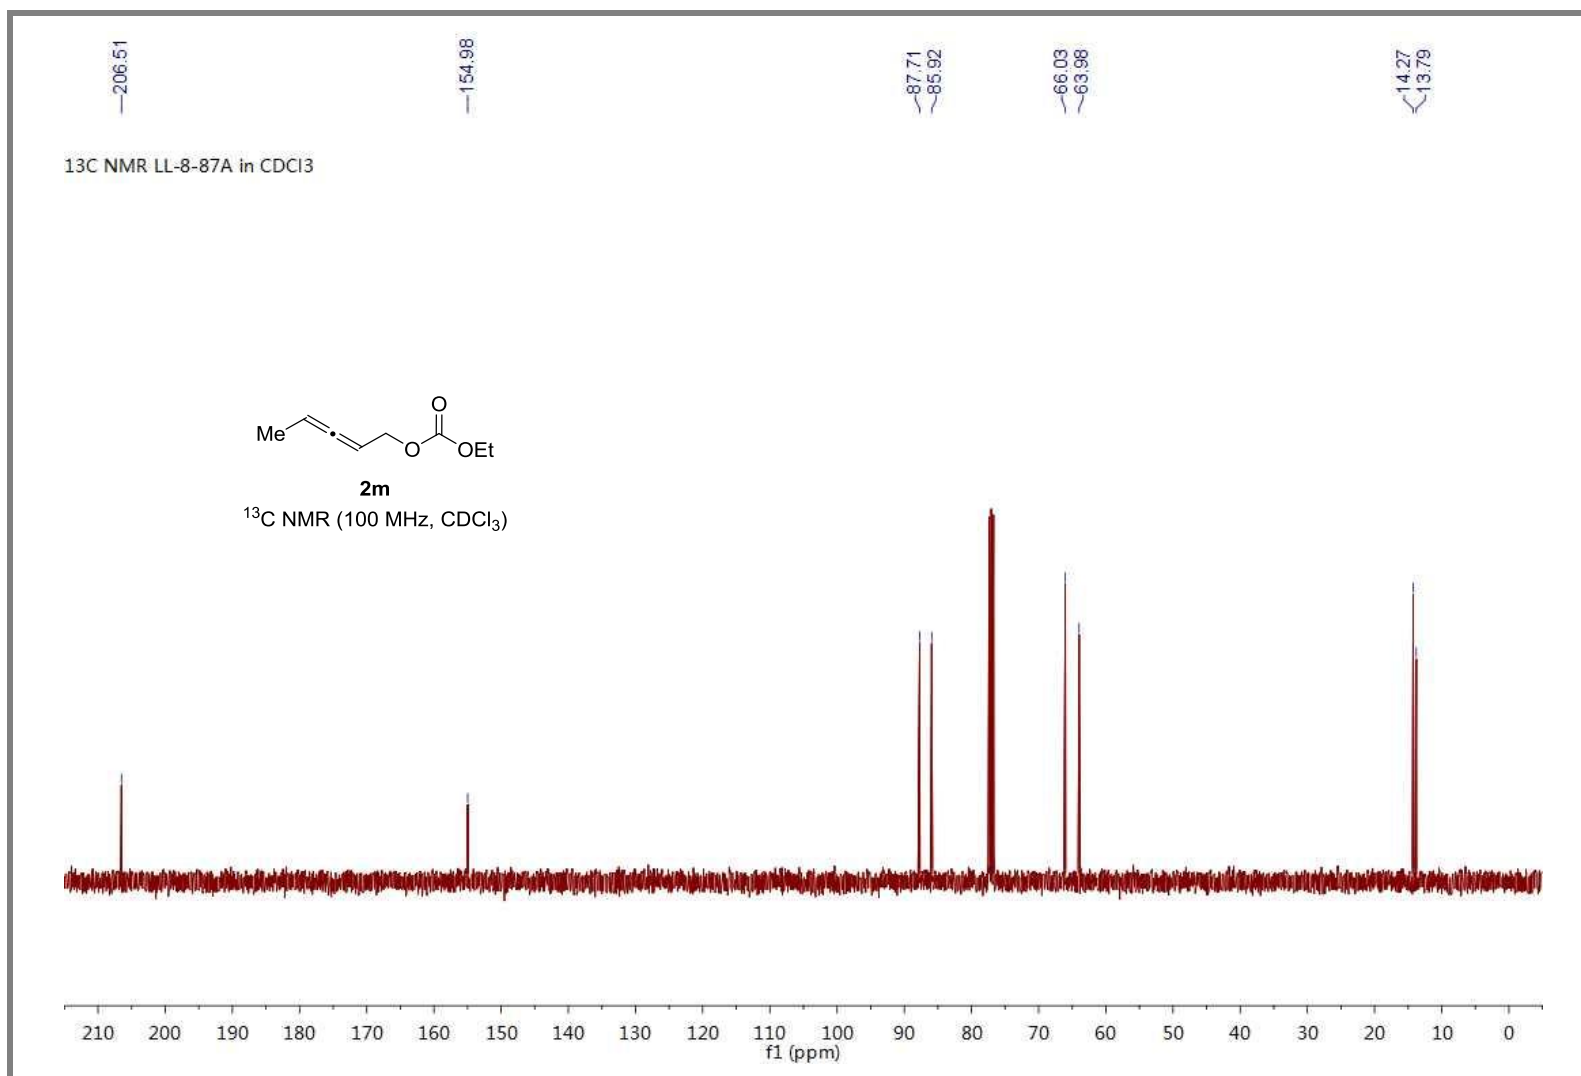

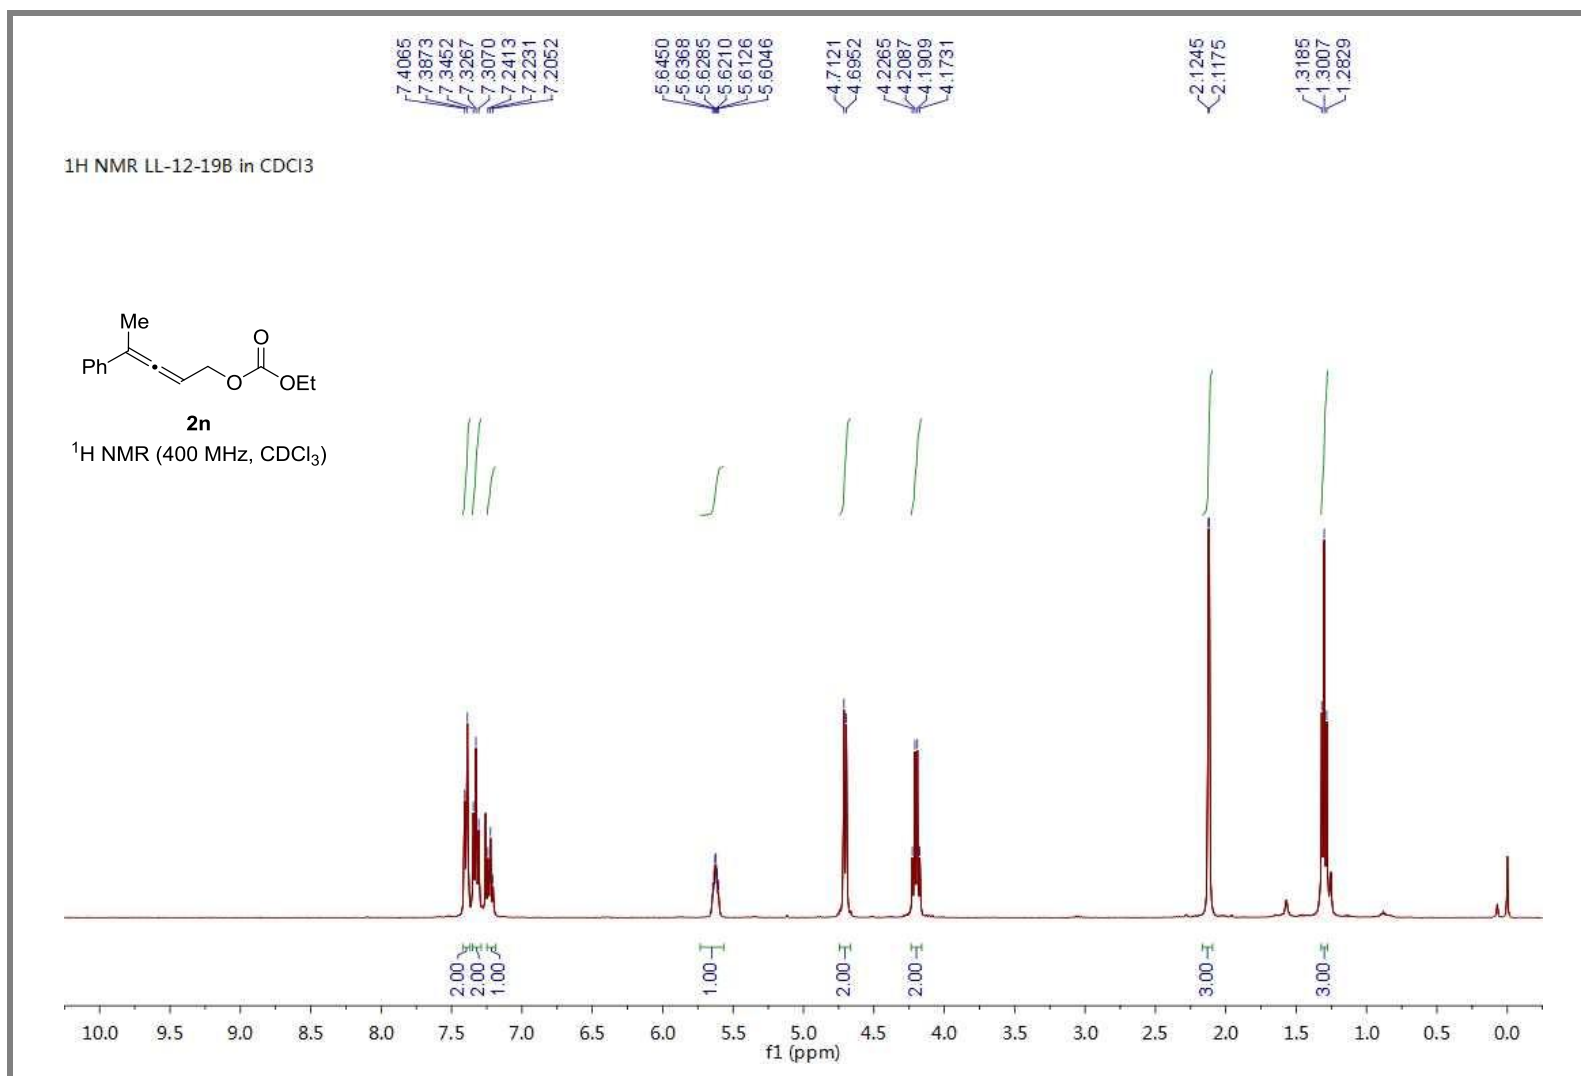

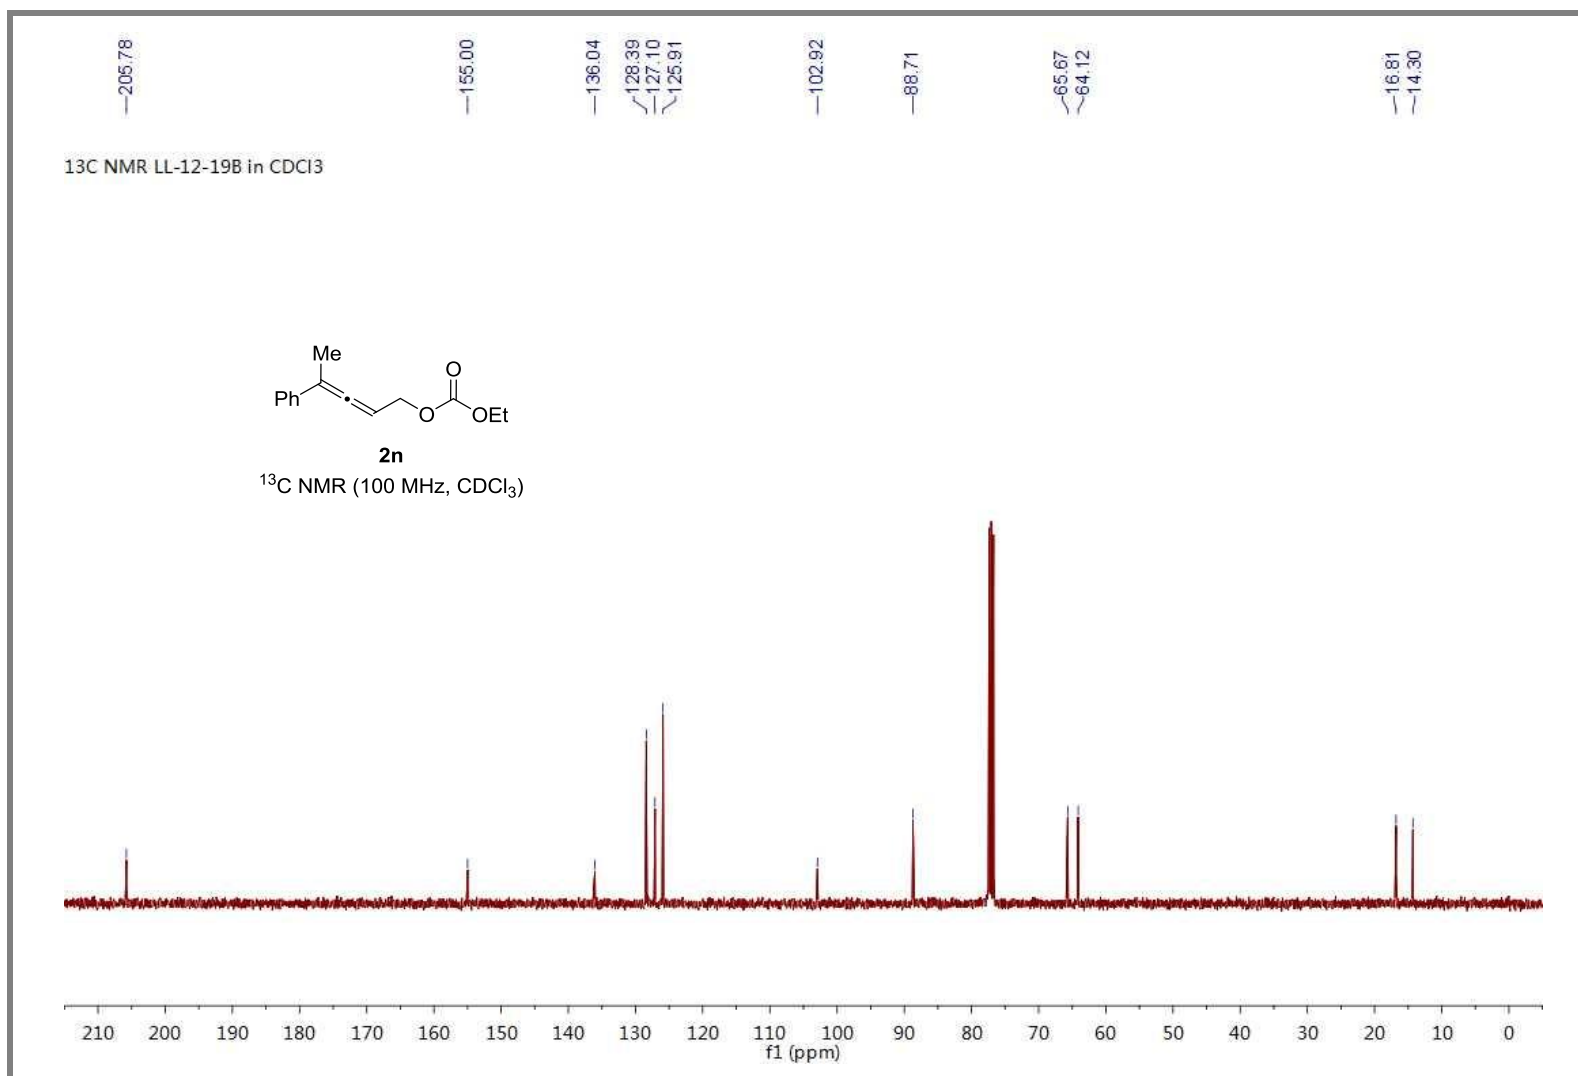



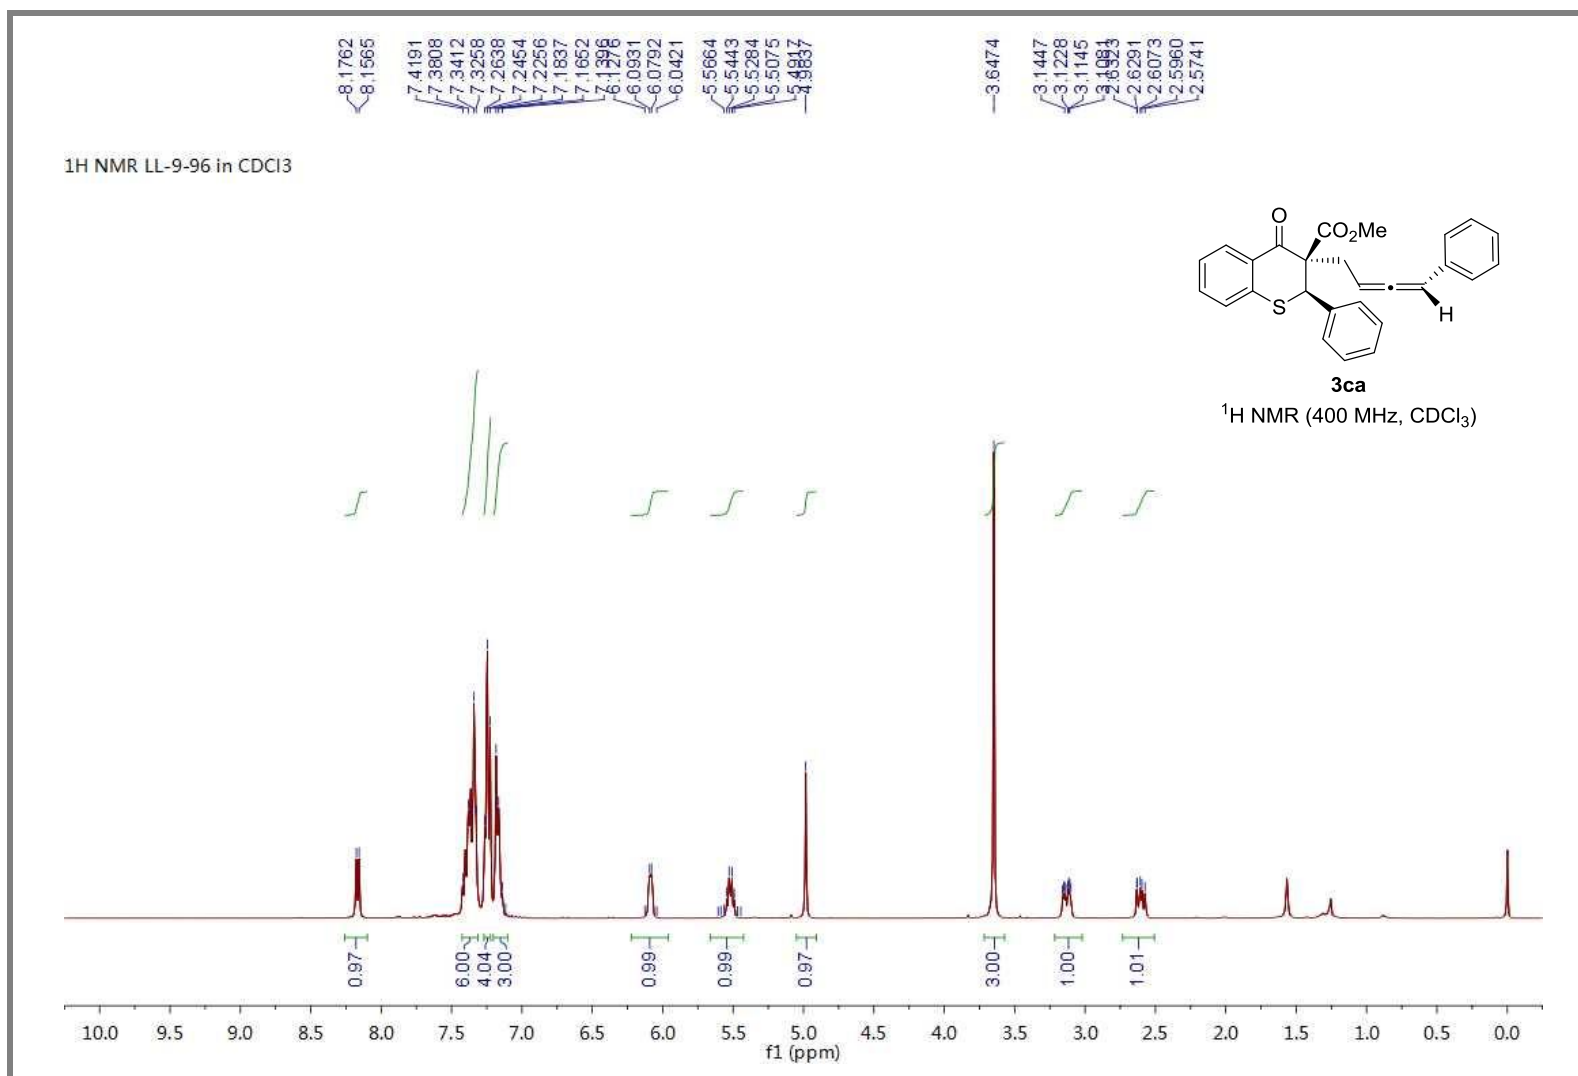

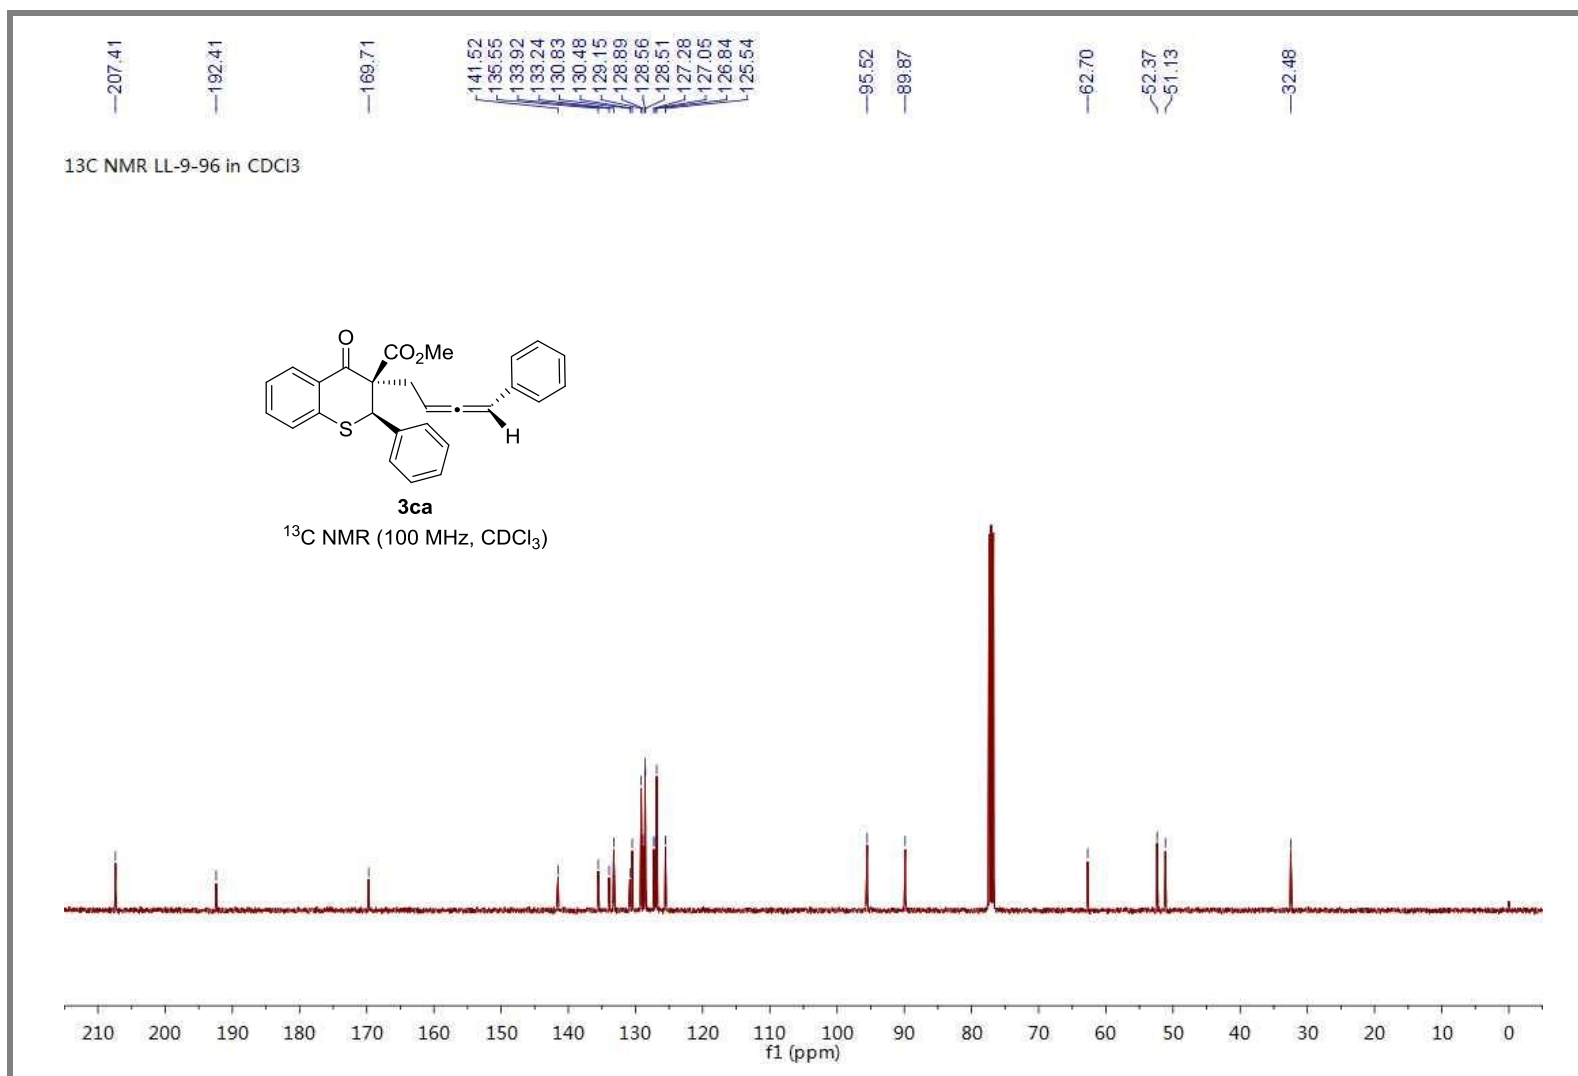

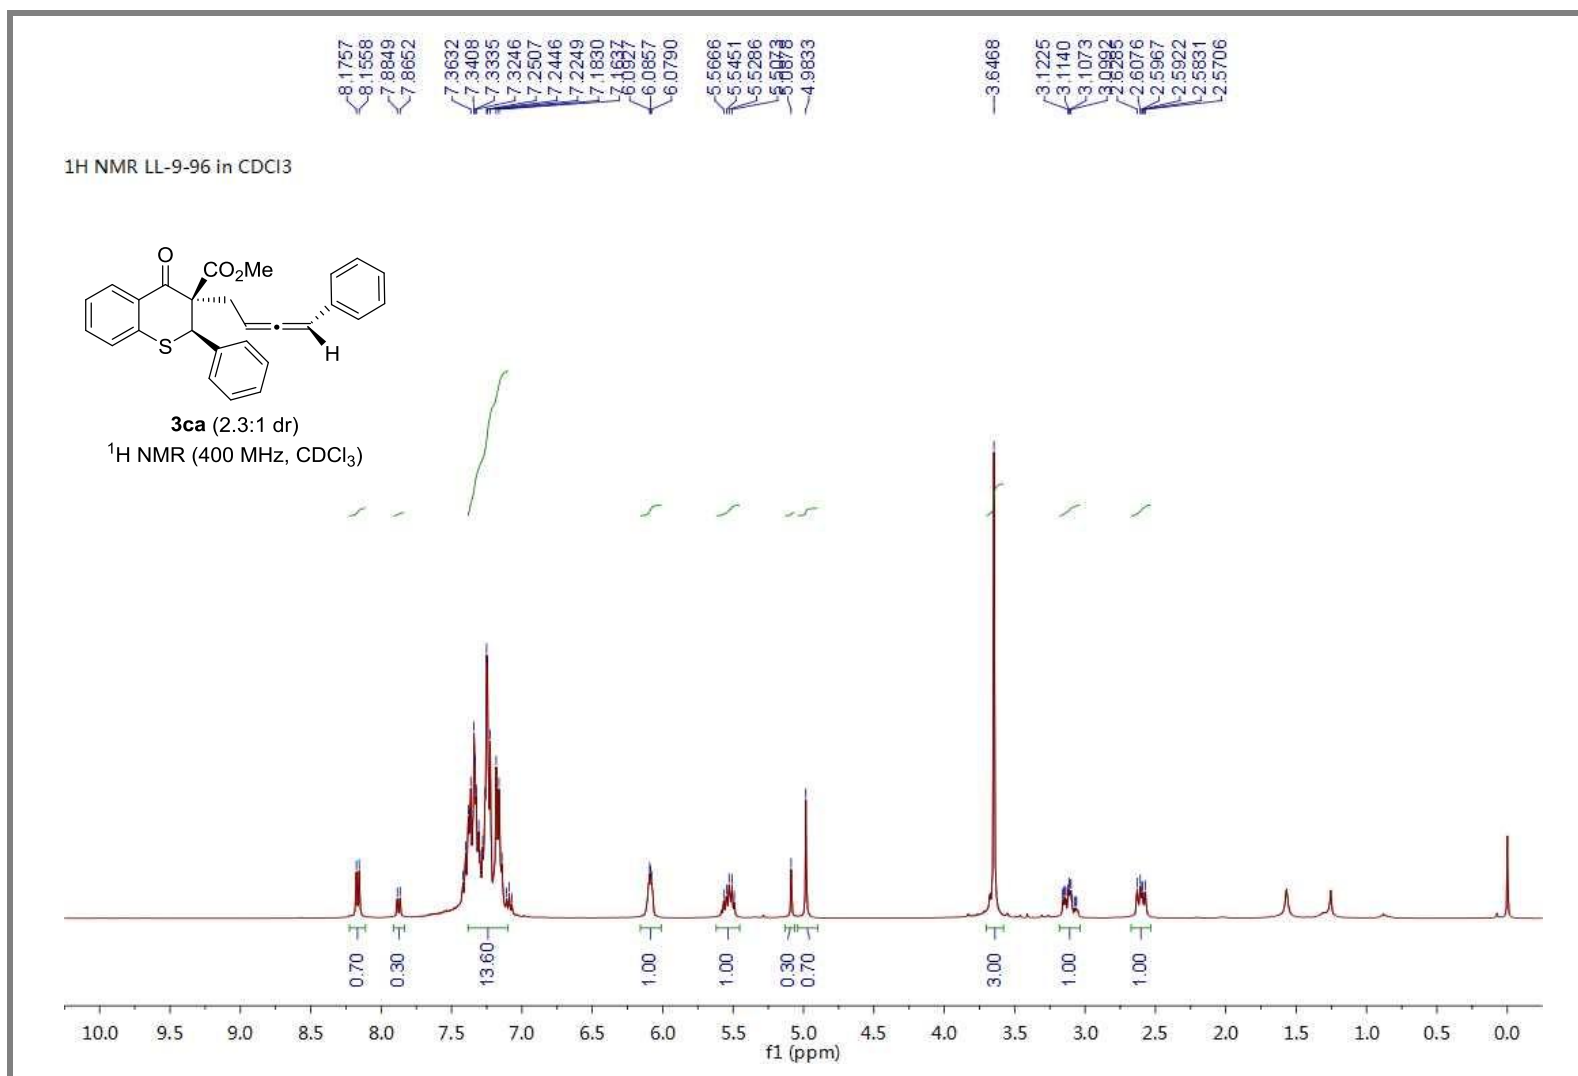

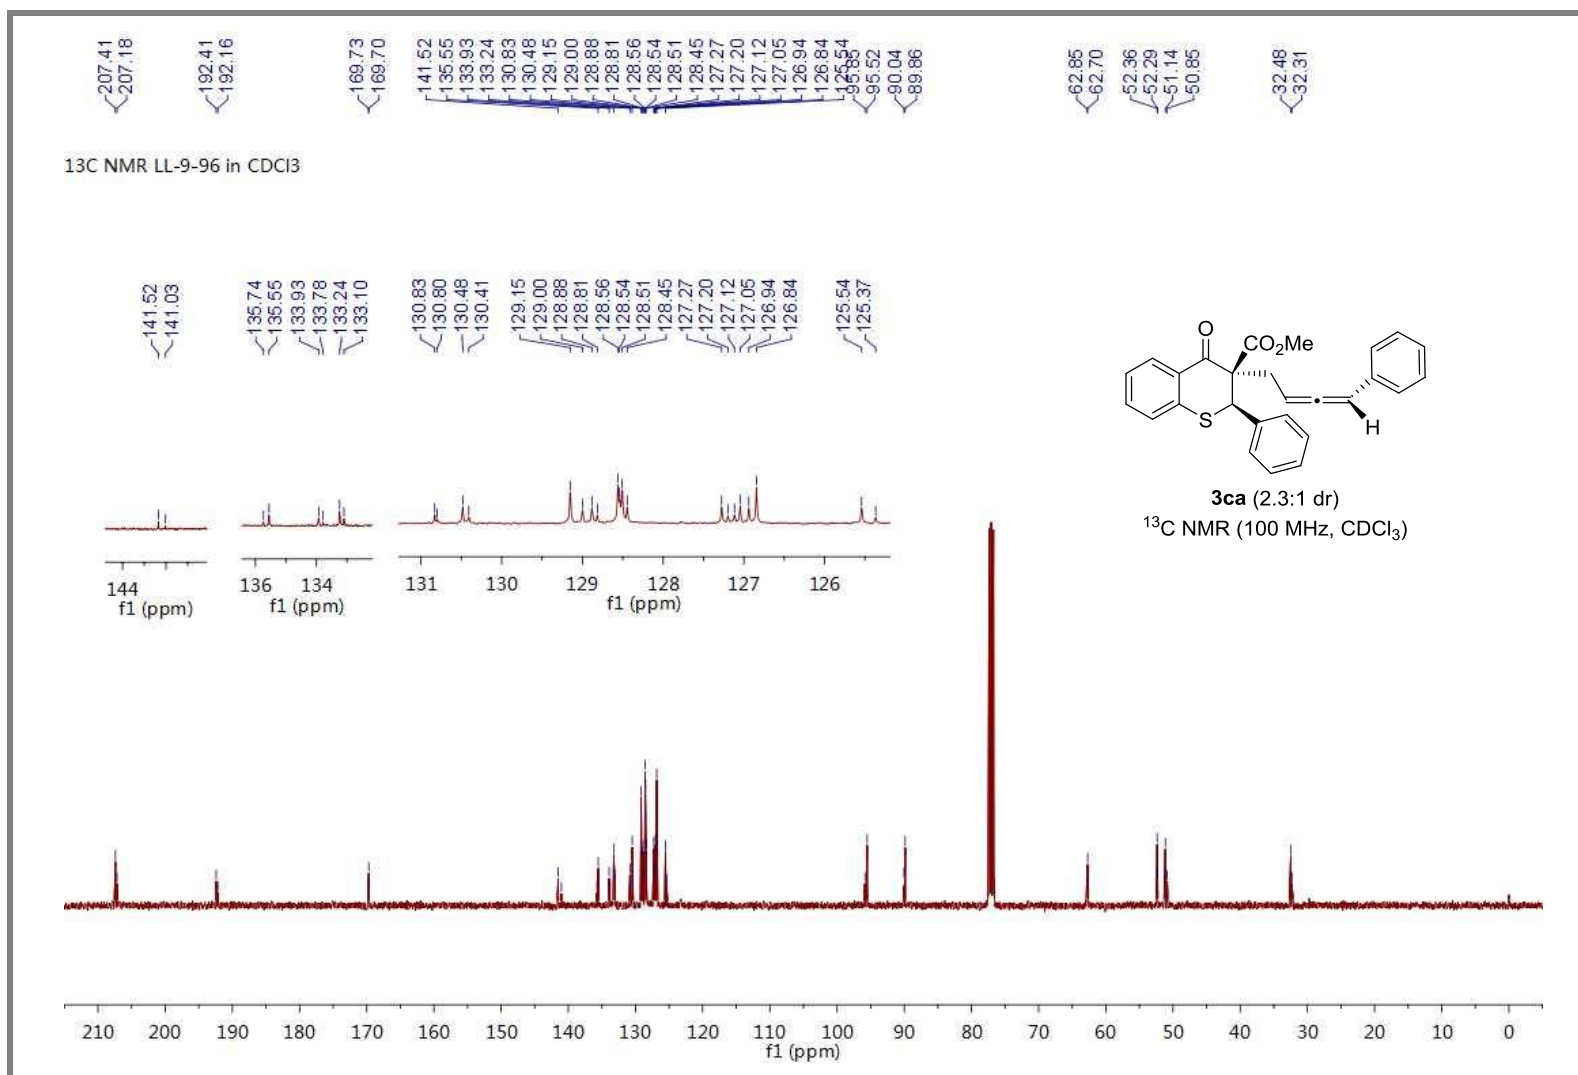

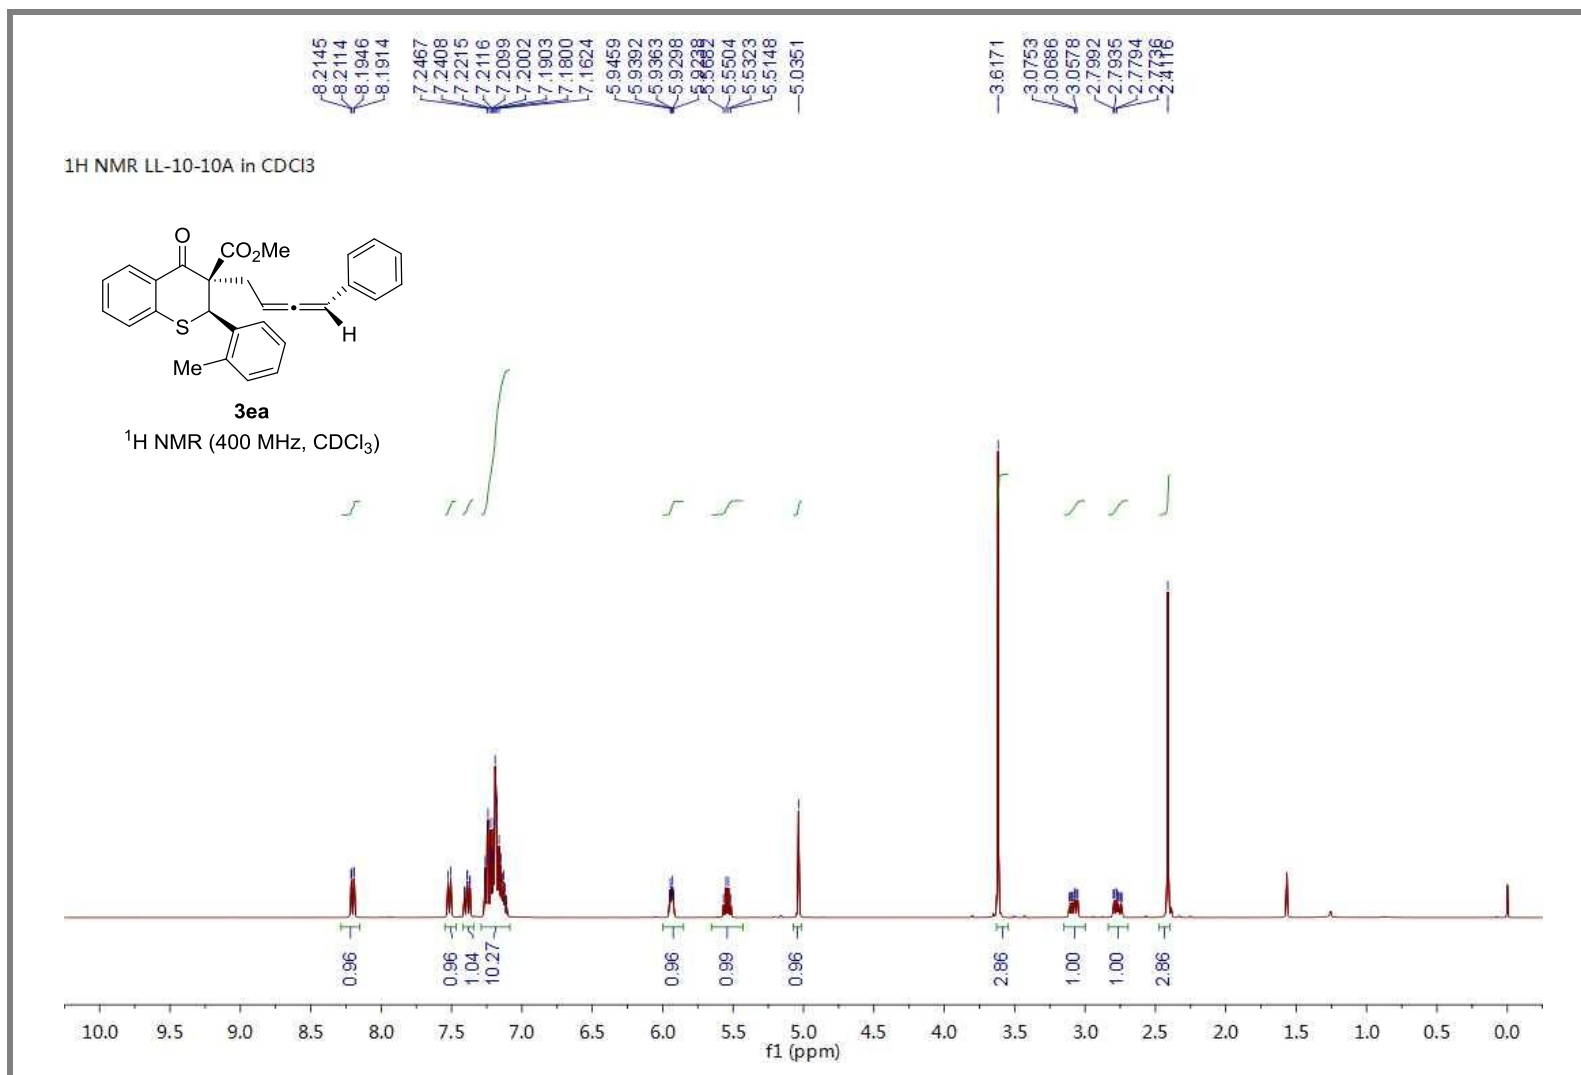

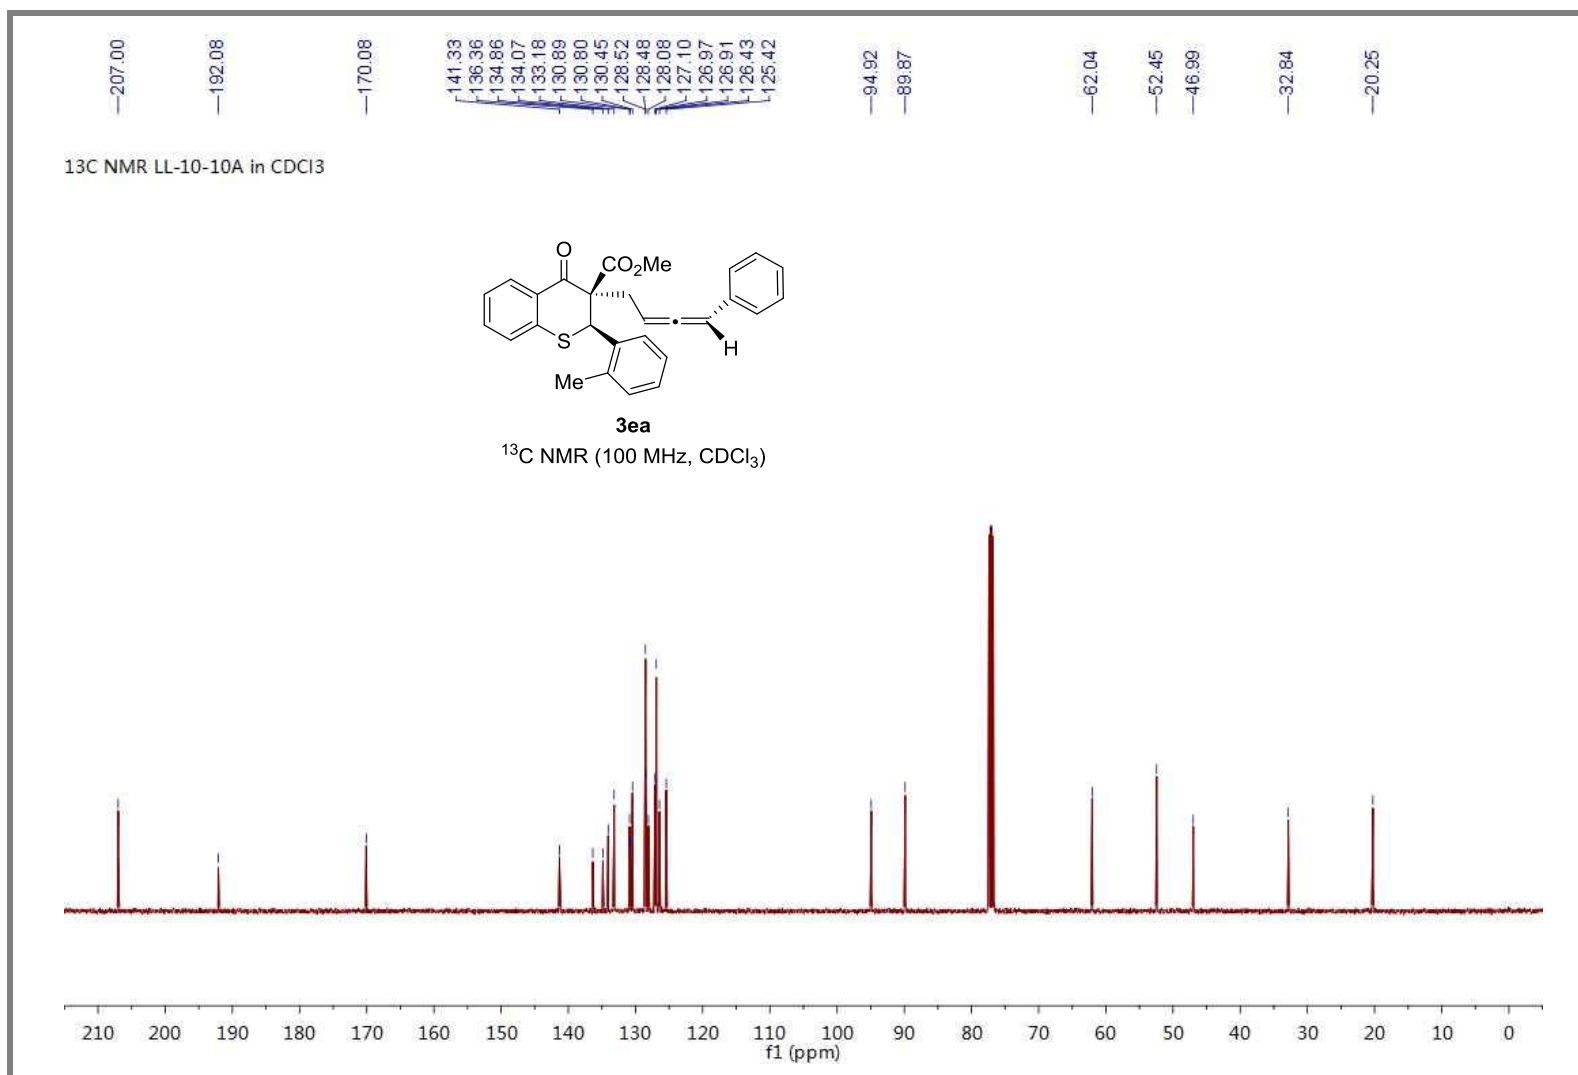

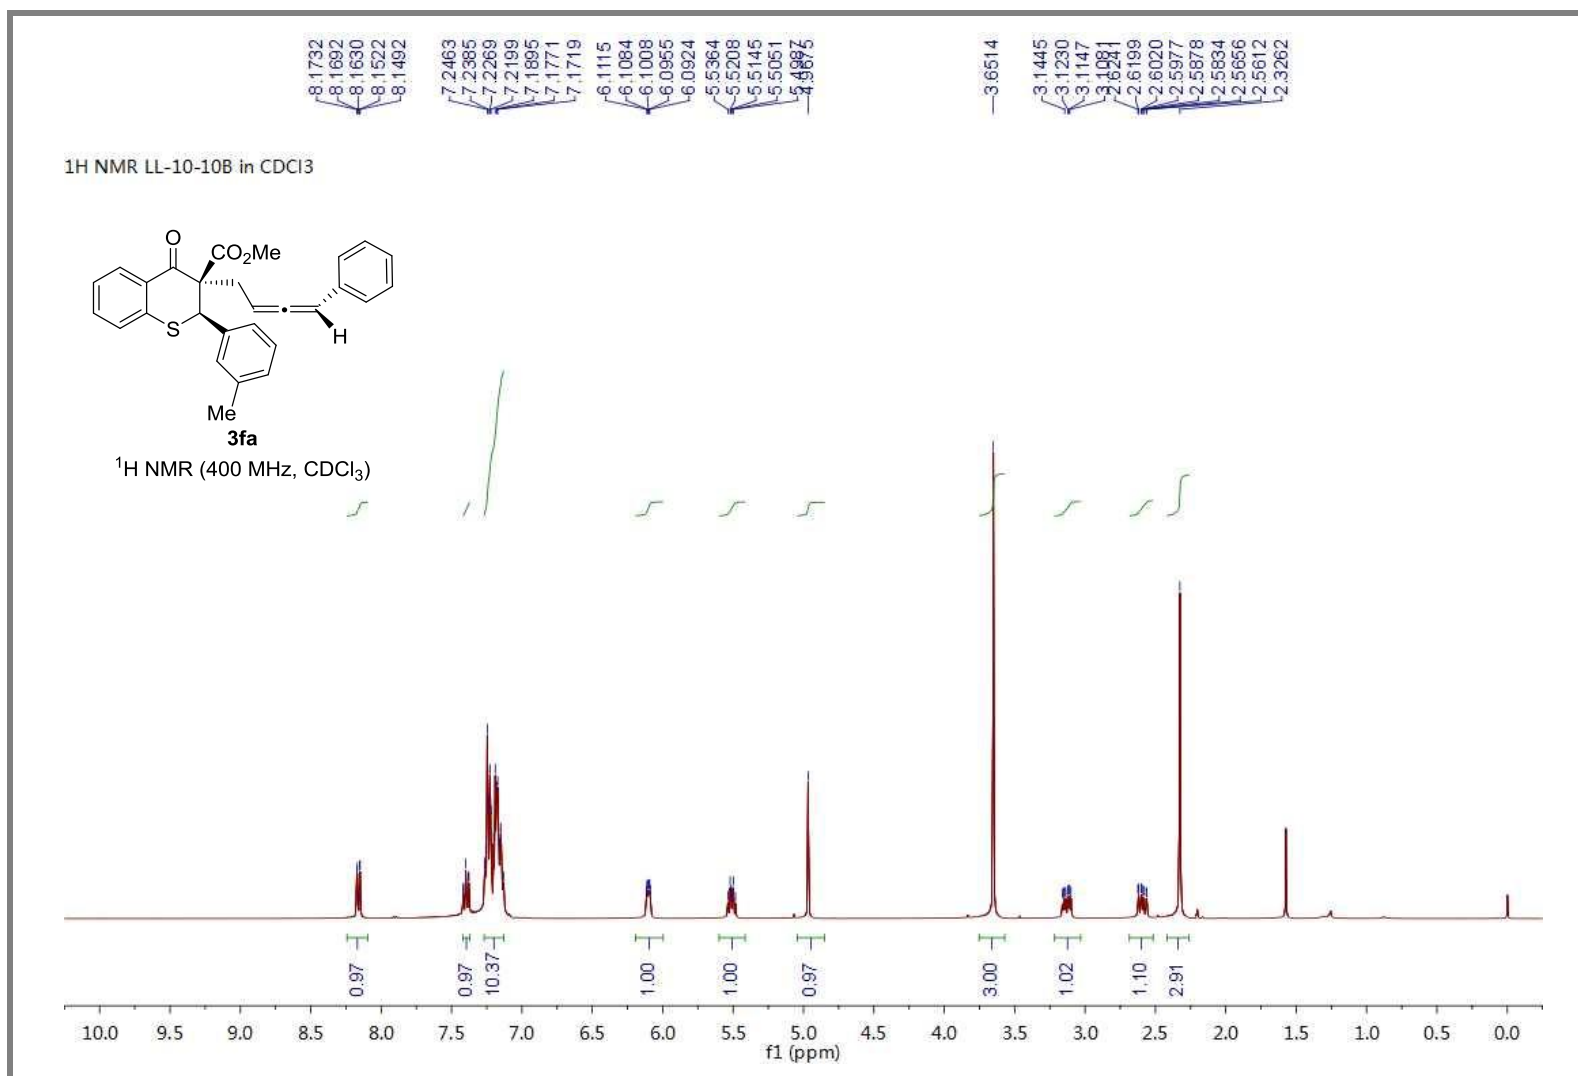

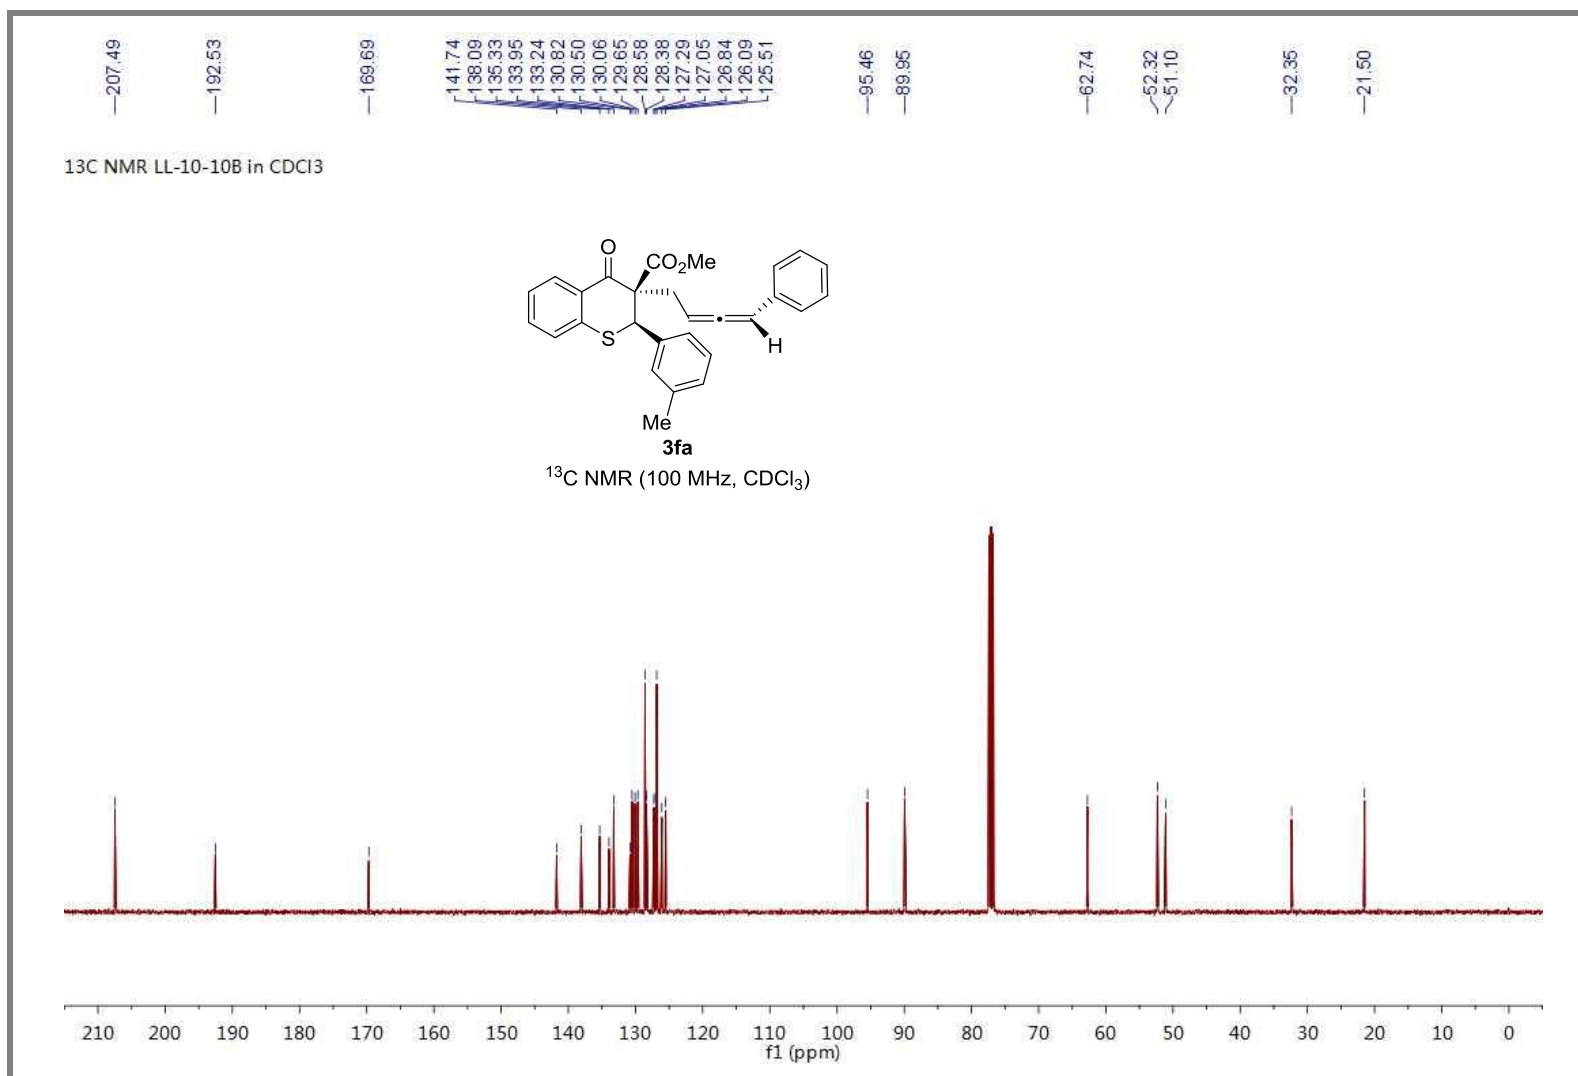



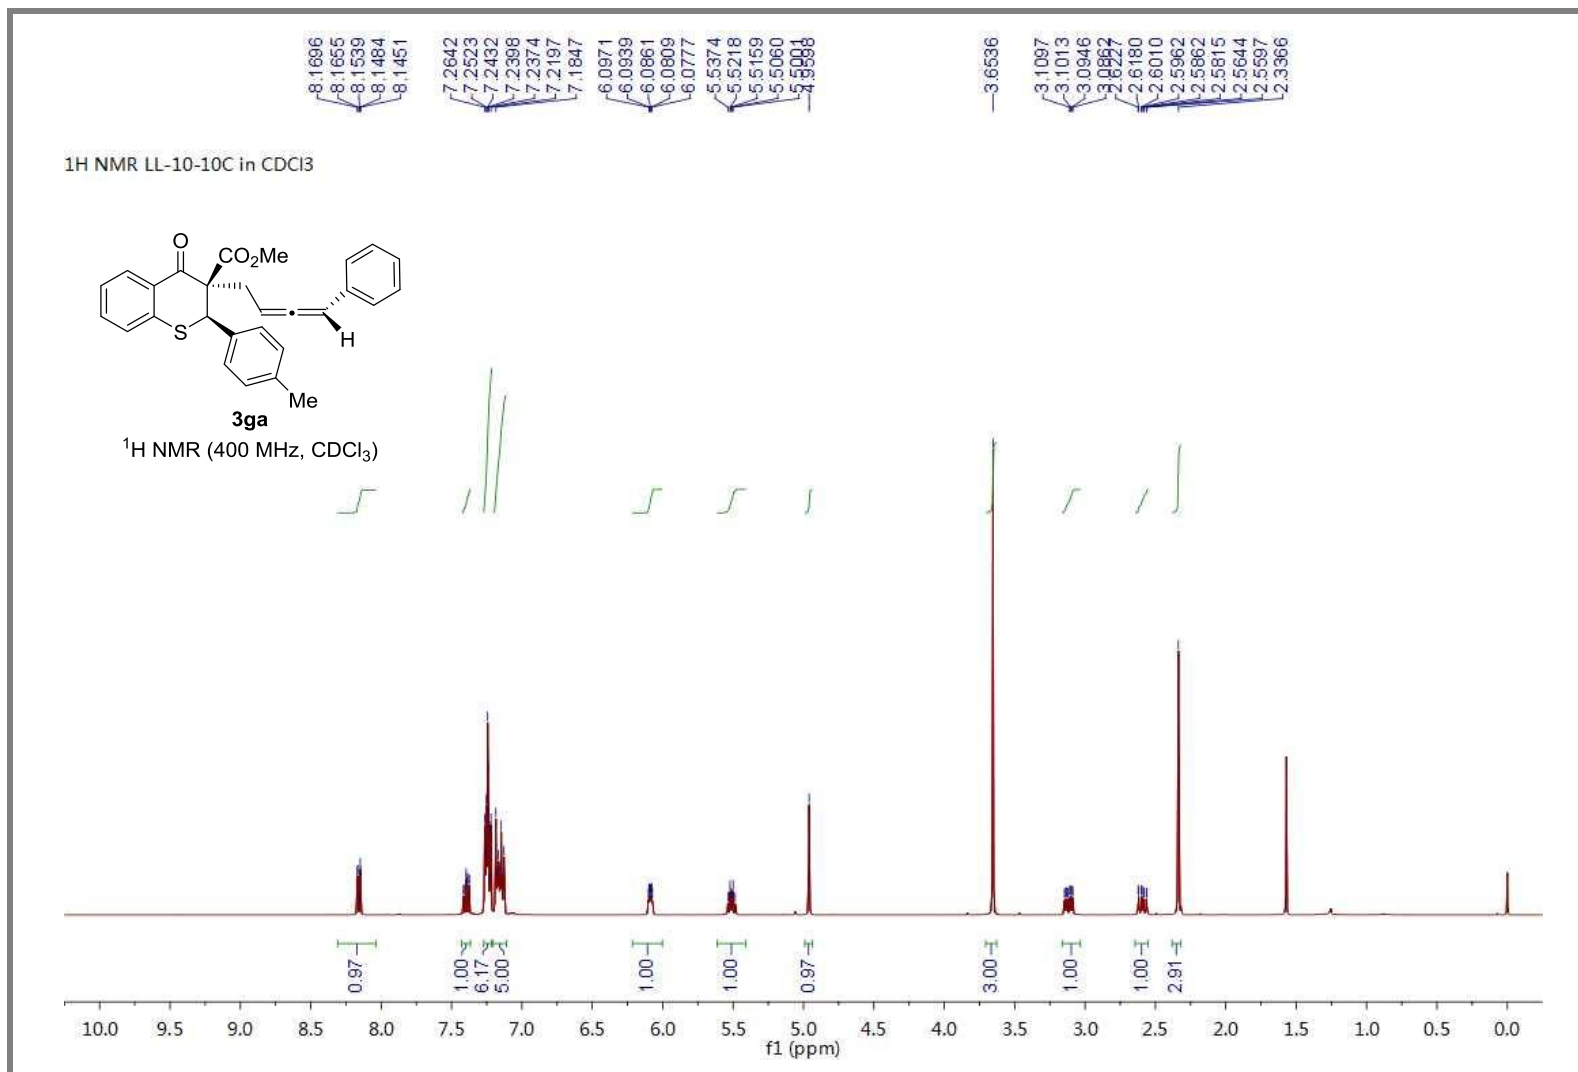

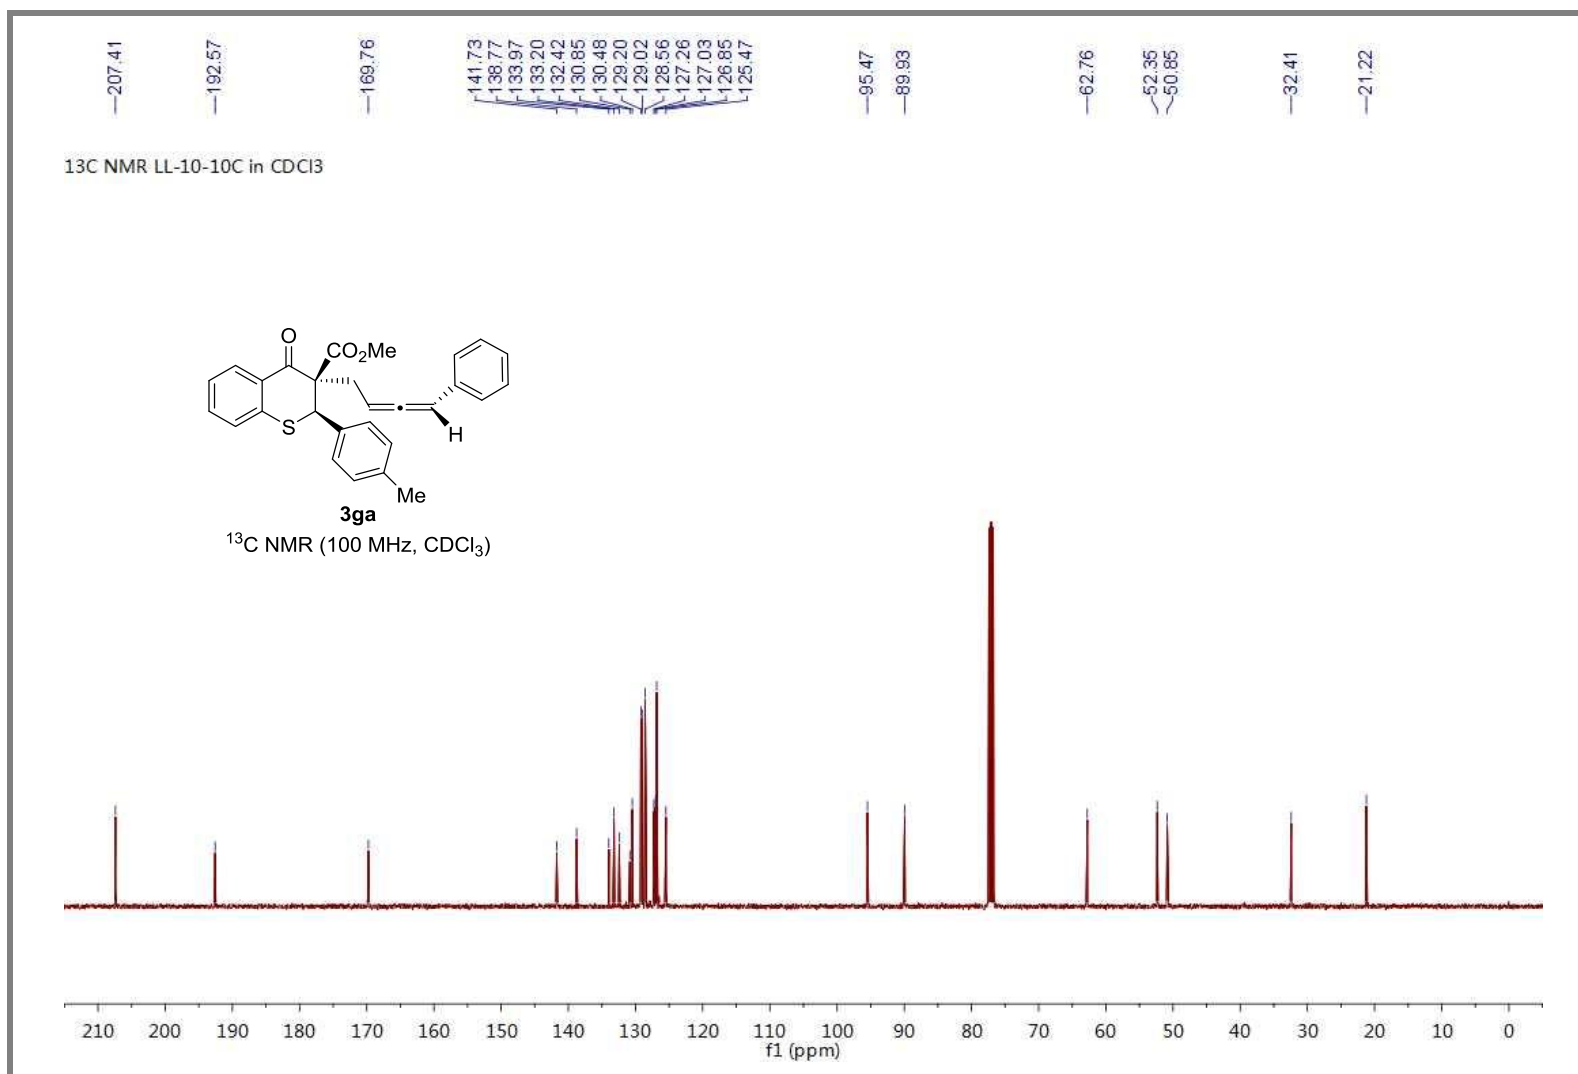

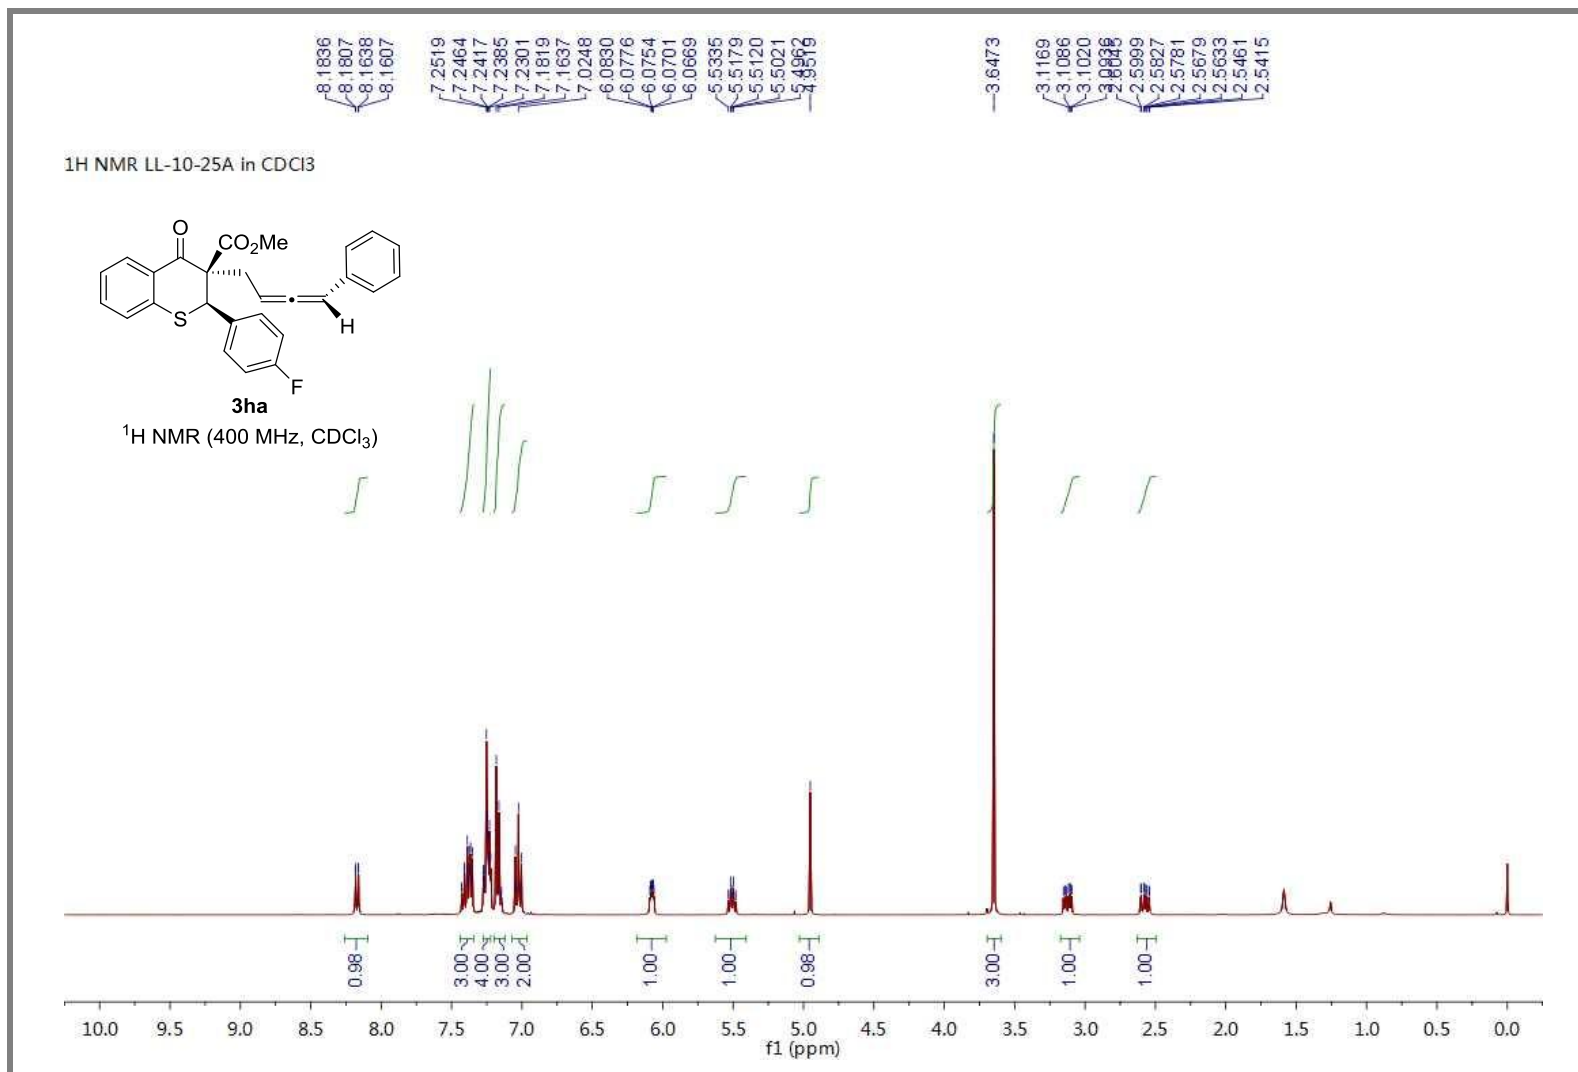

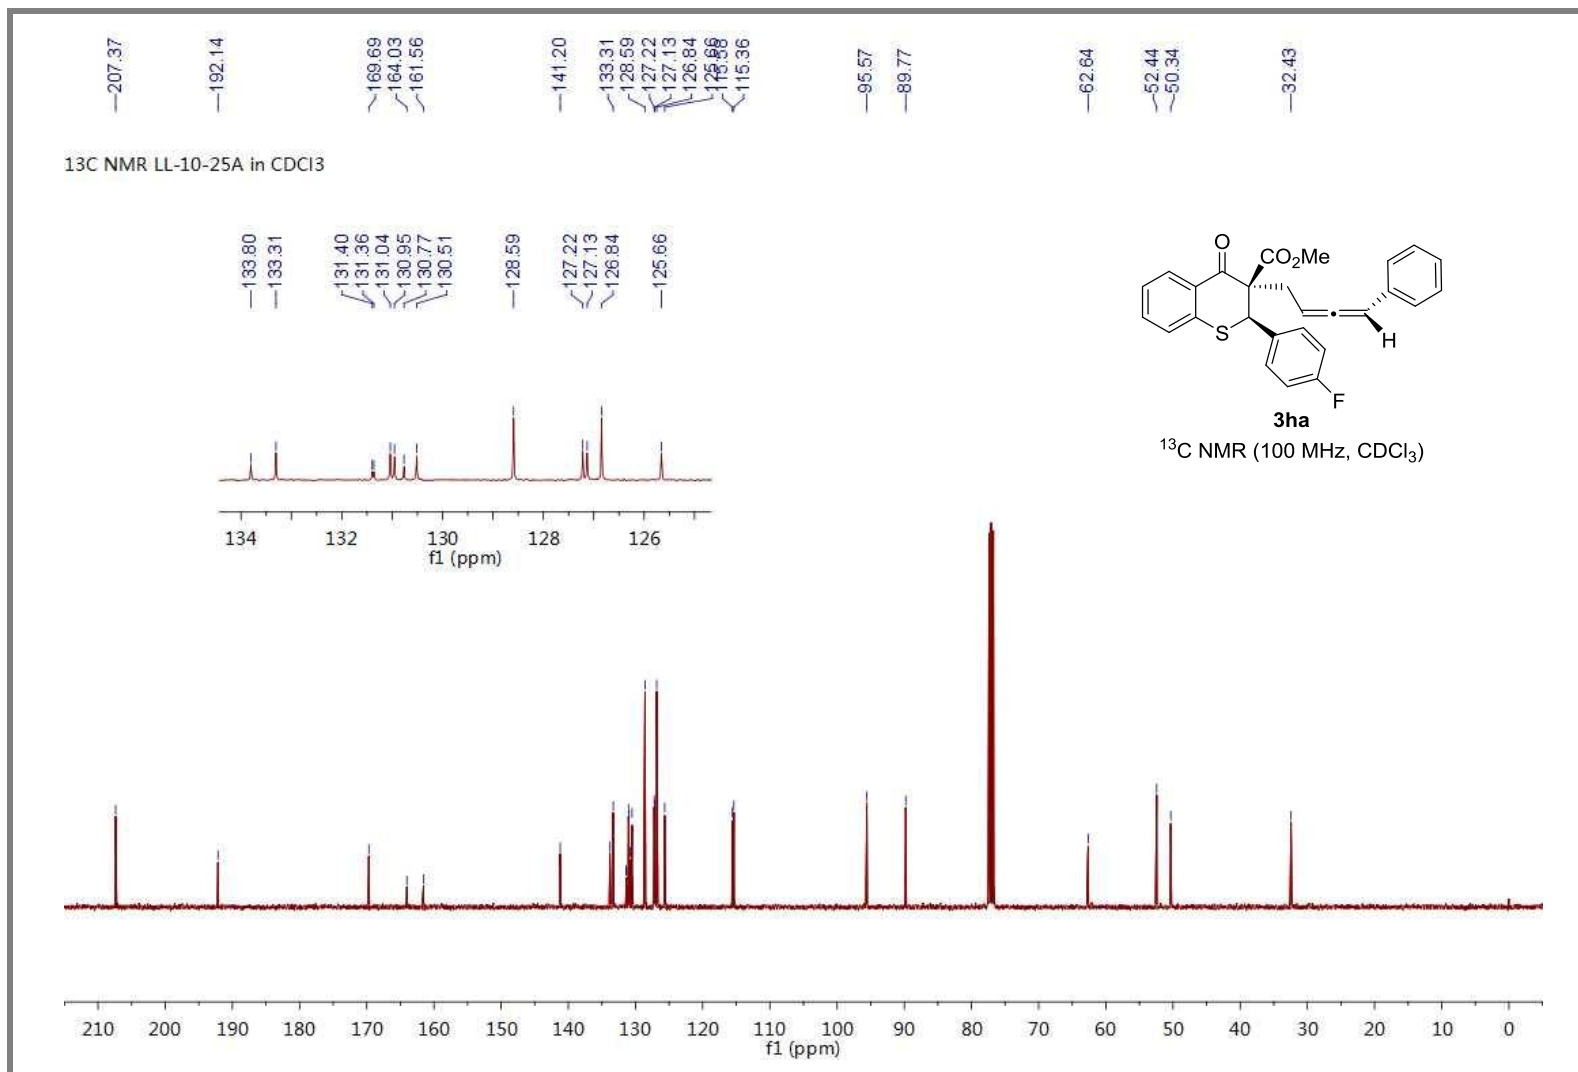

<sup>19</sup>F NMR LL-10-25A in CDCl<sub>3</sub>

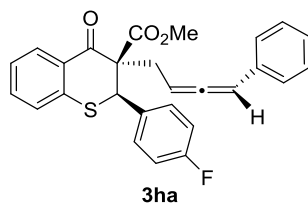

<sup>19</sup>F NMR (376 MHz, CDCl<sub>3</sub>)

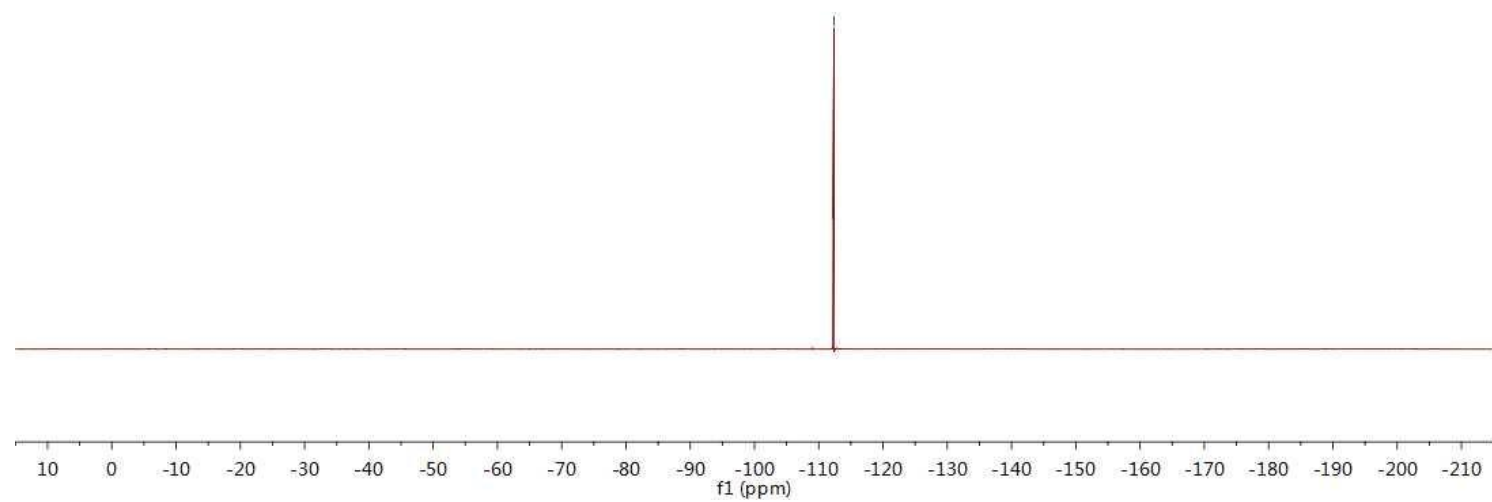

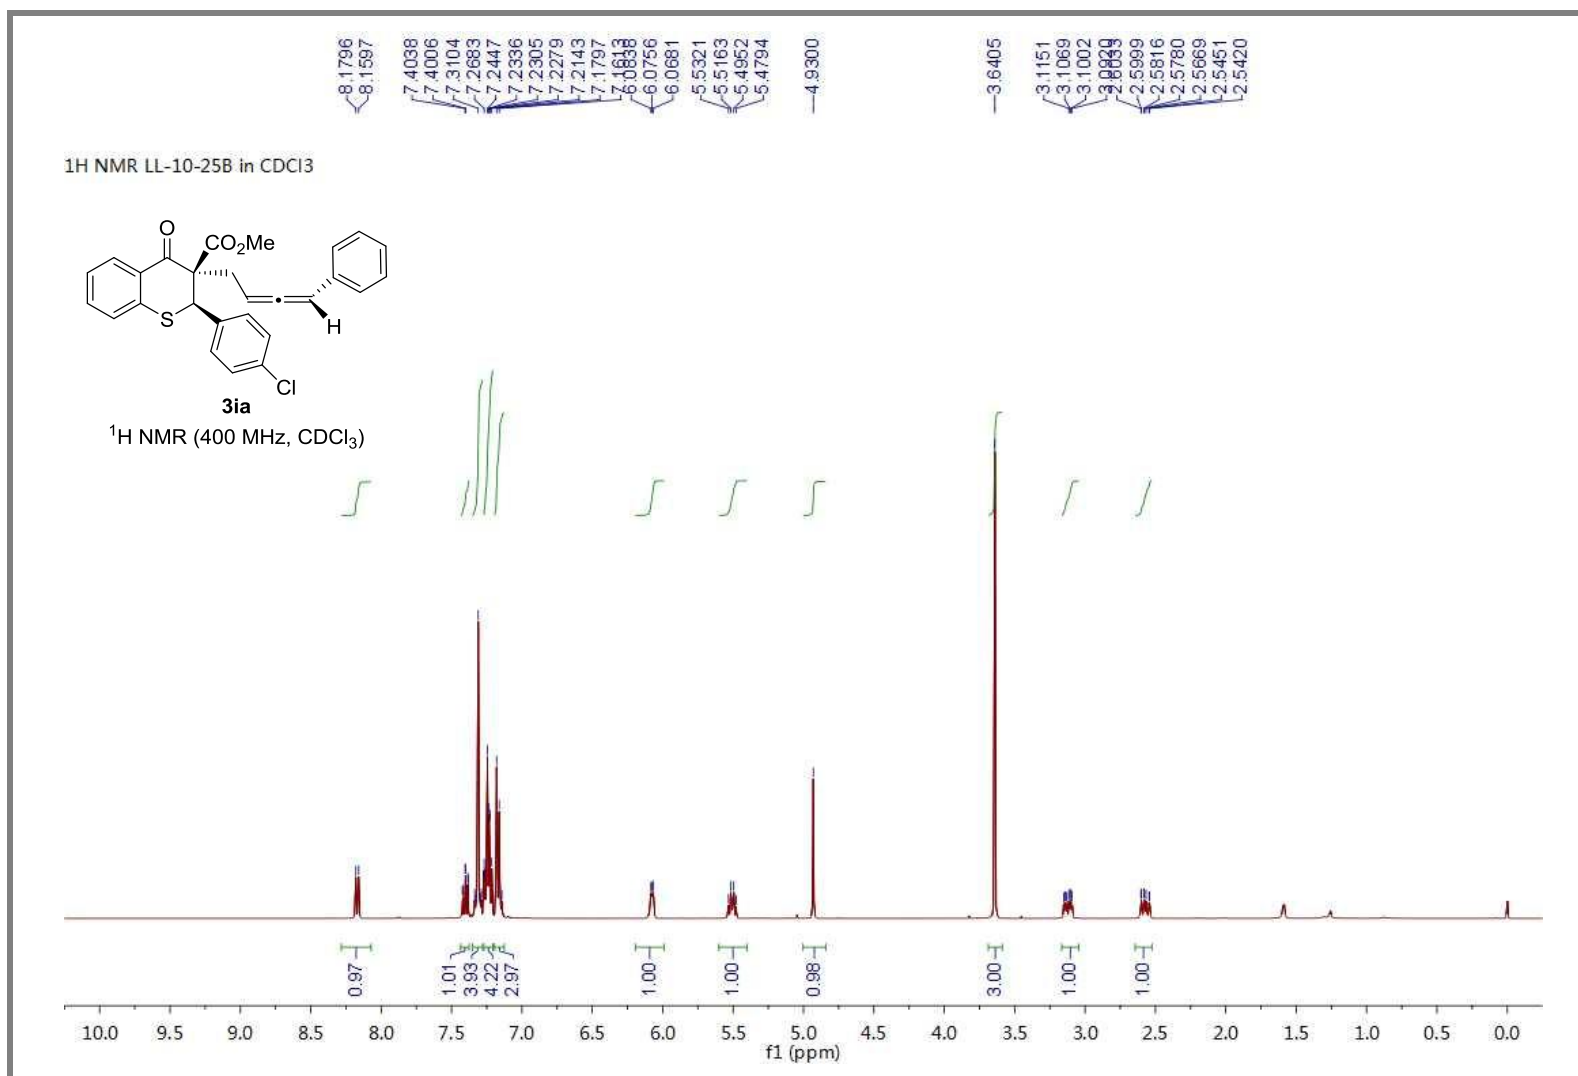

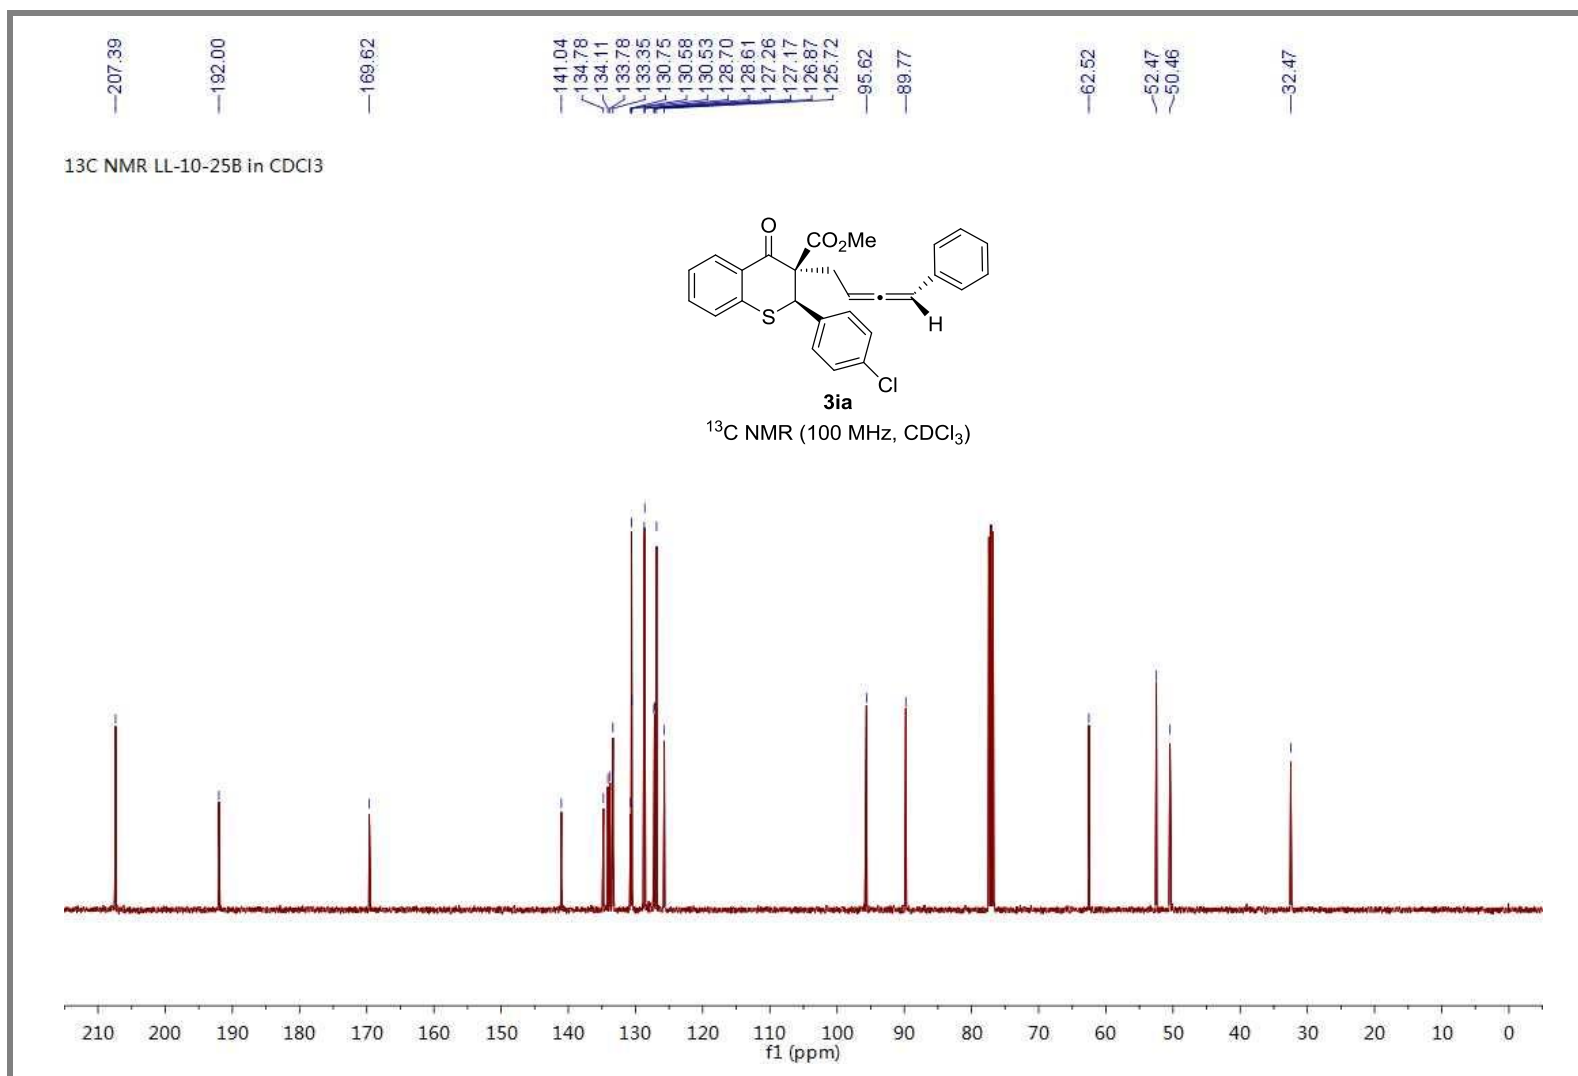

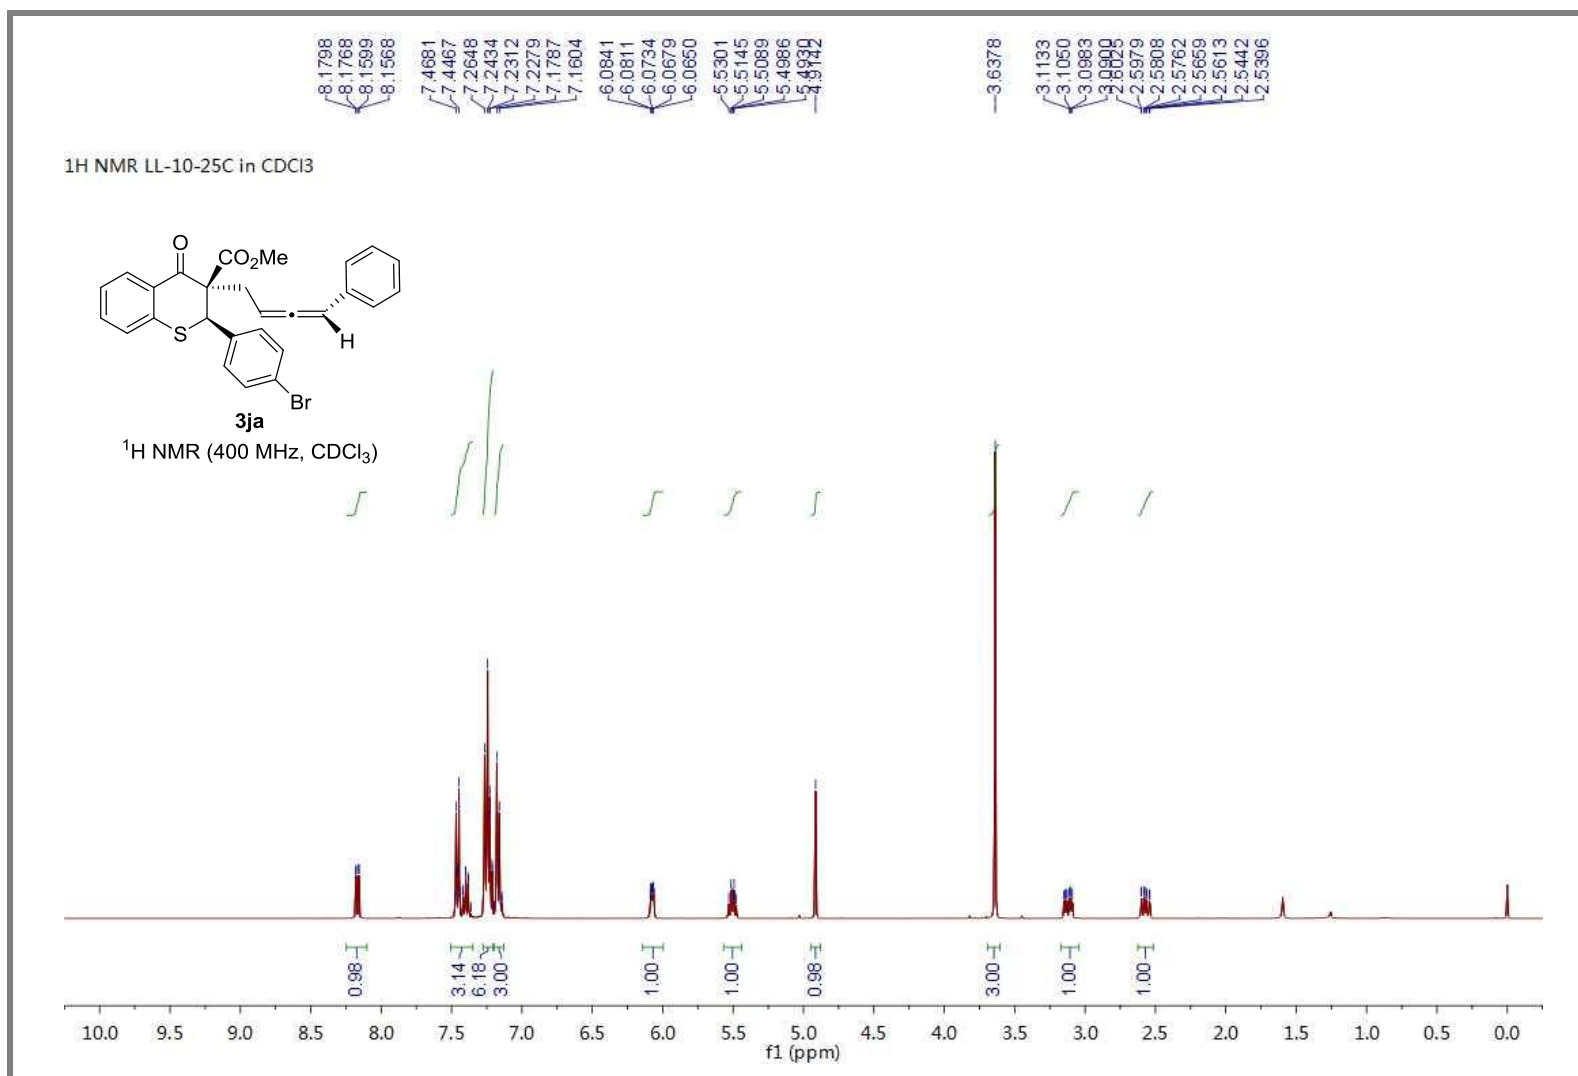



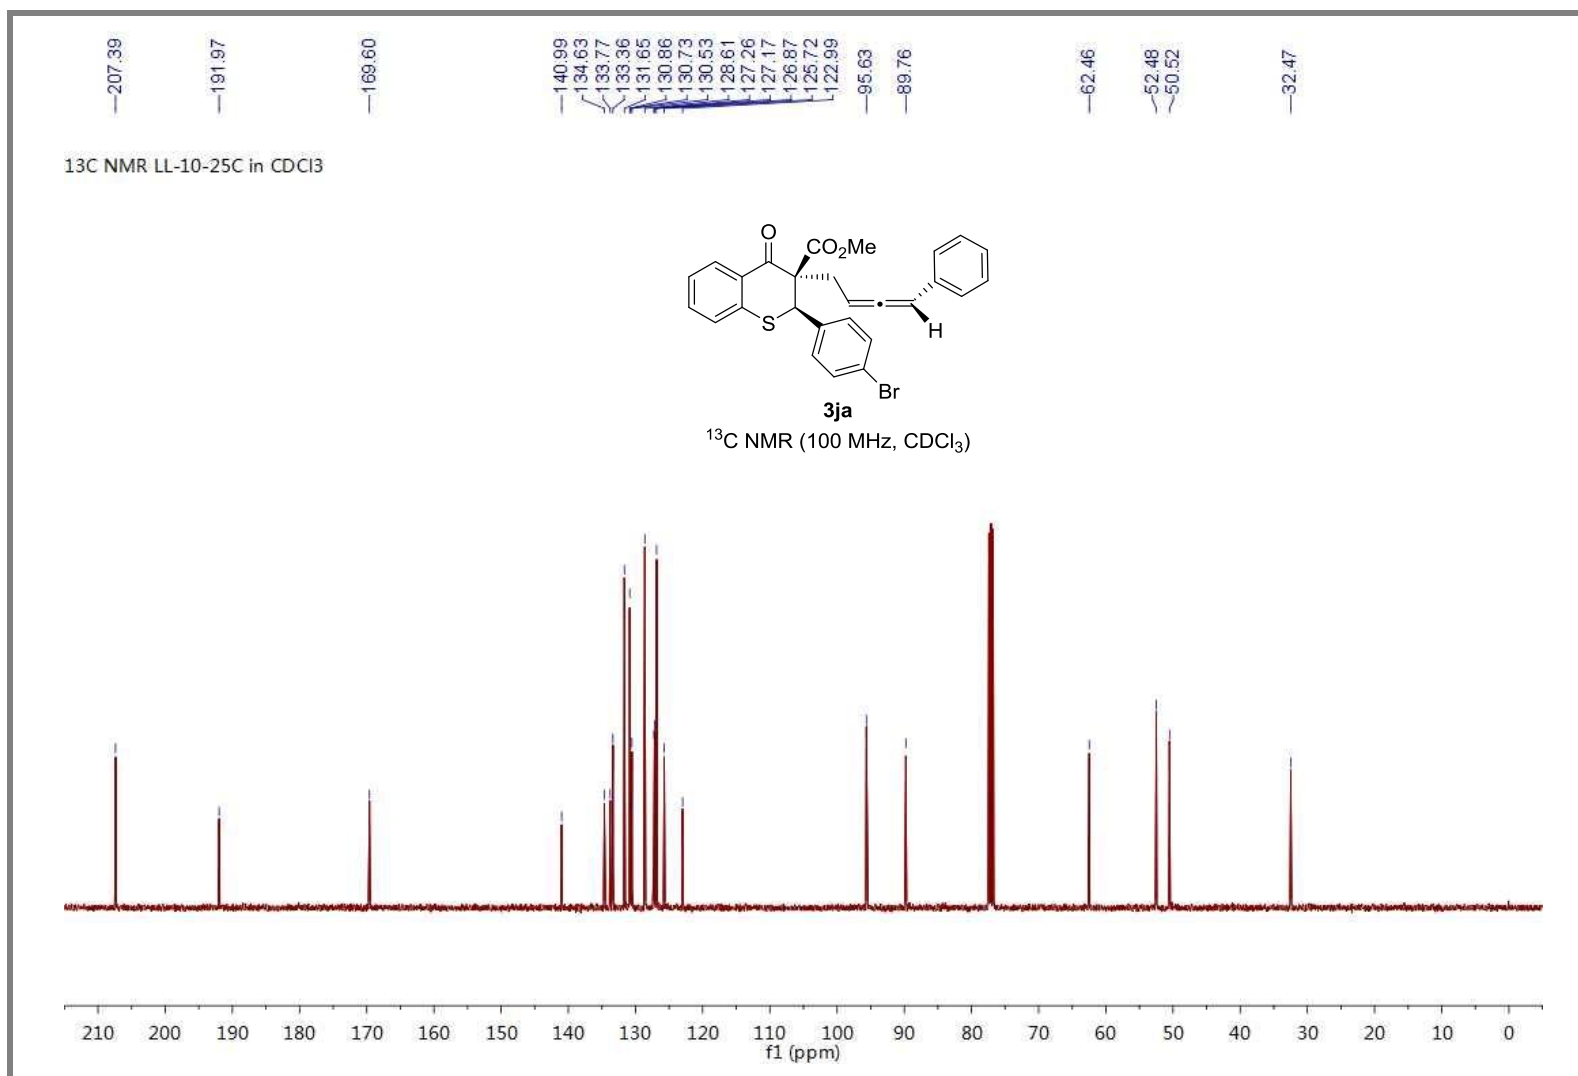

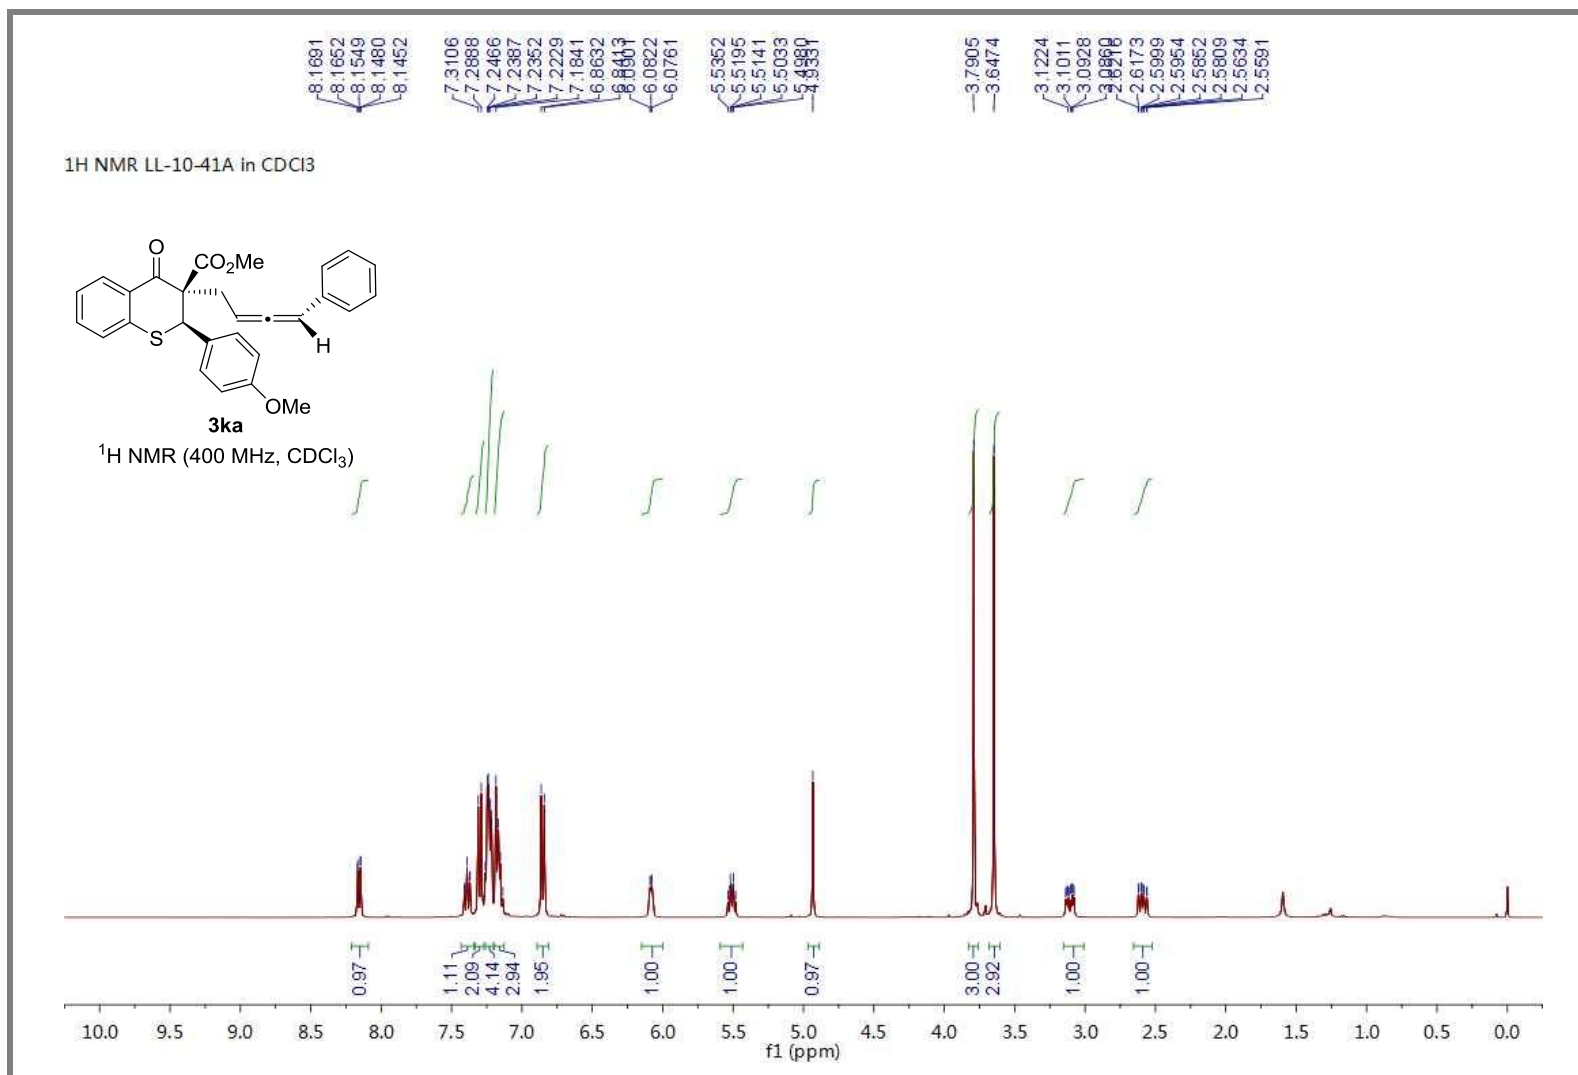

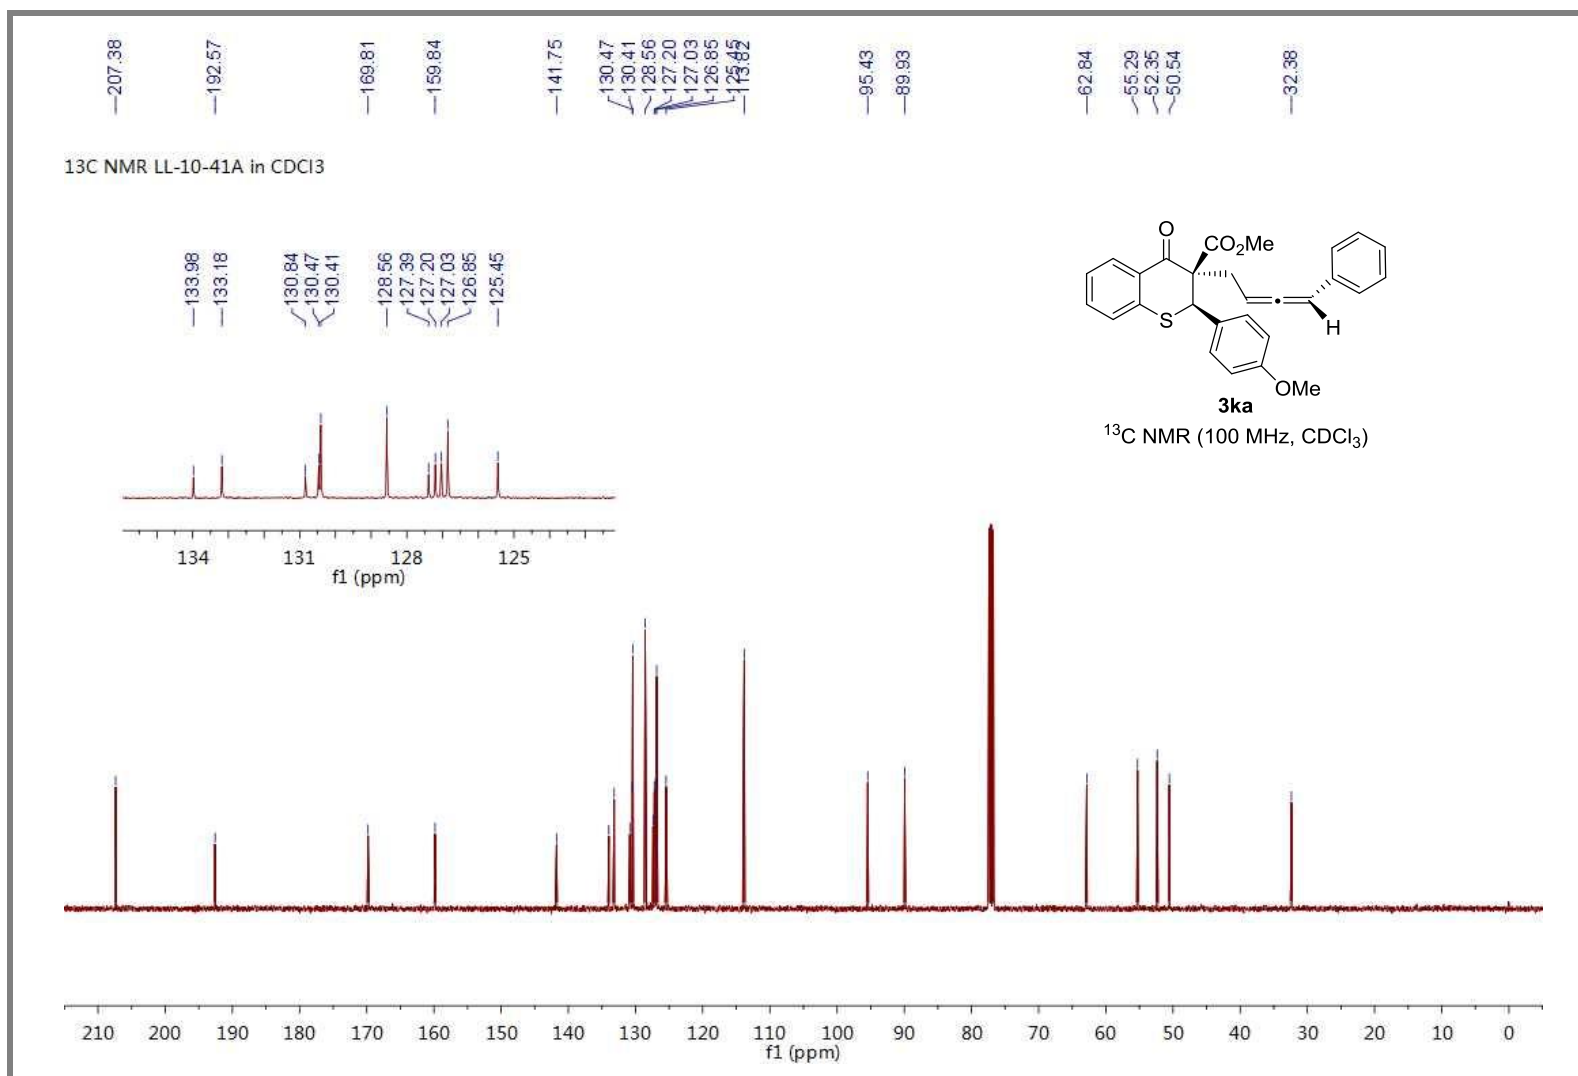

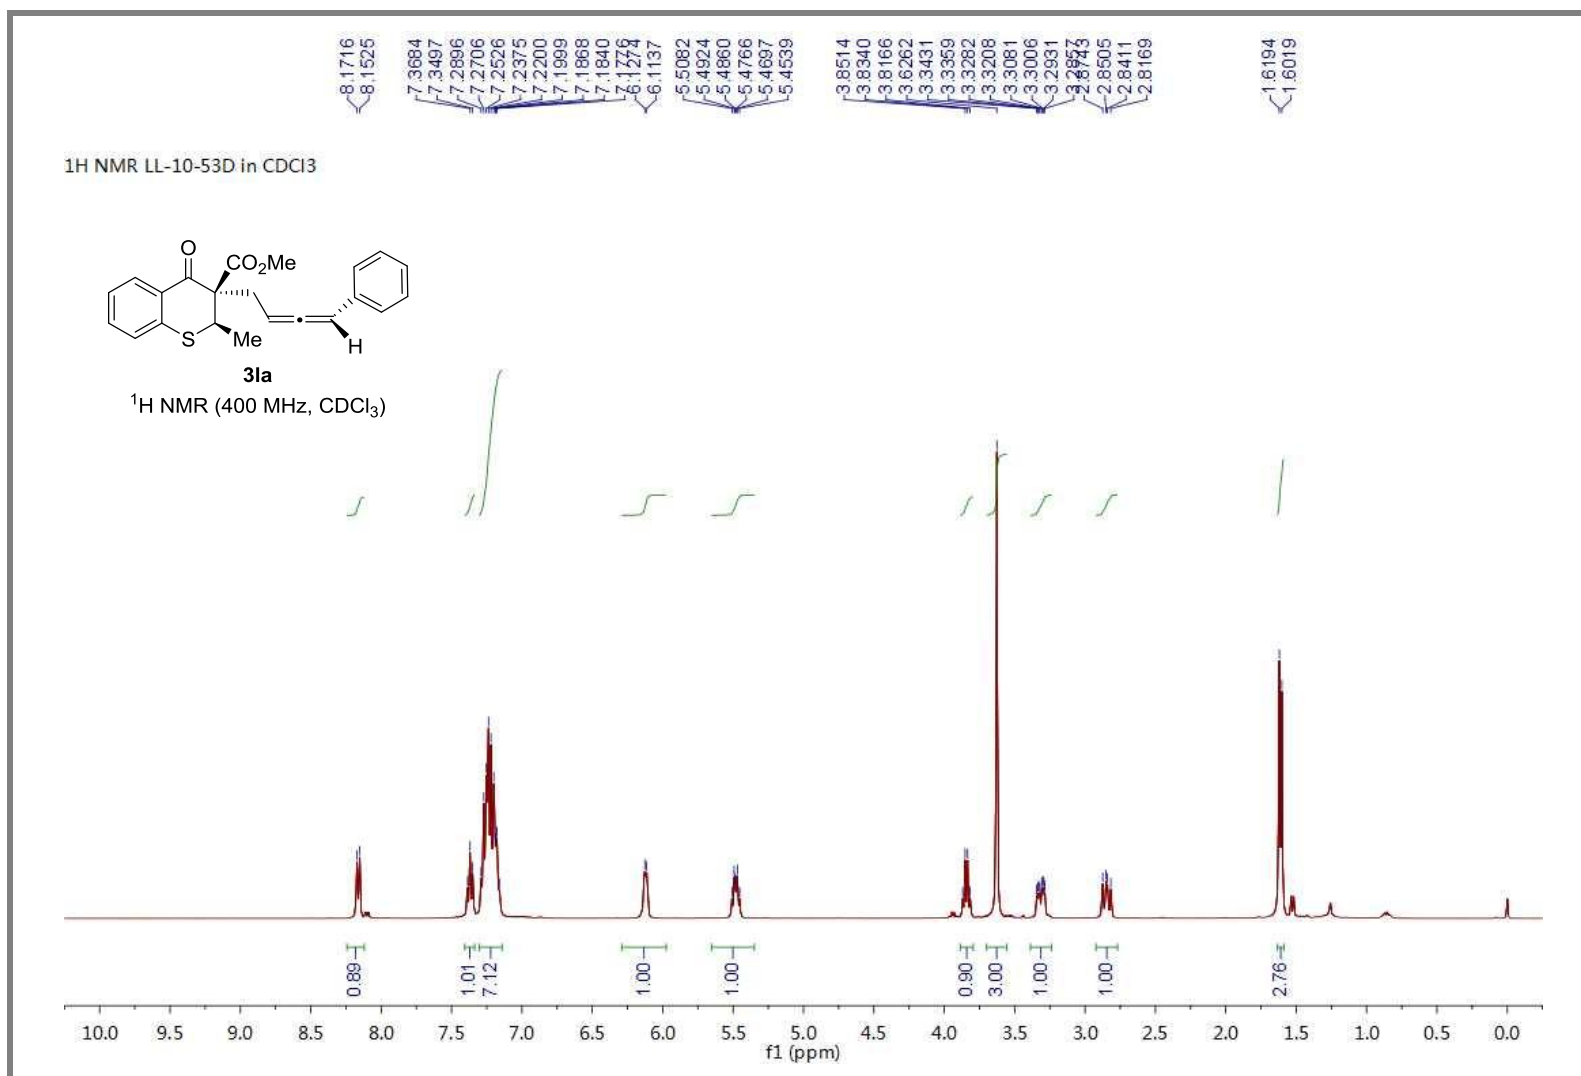

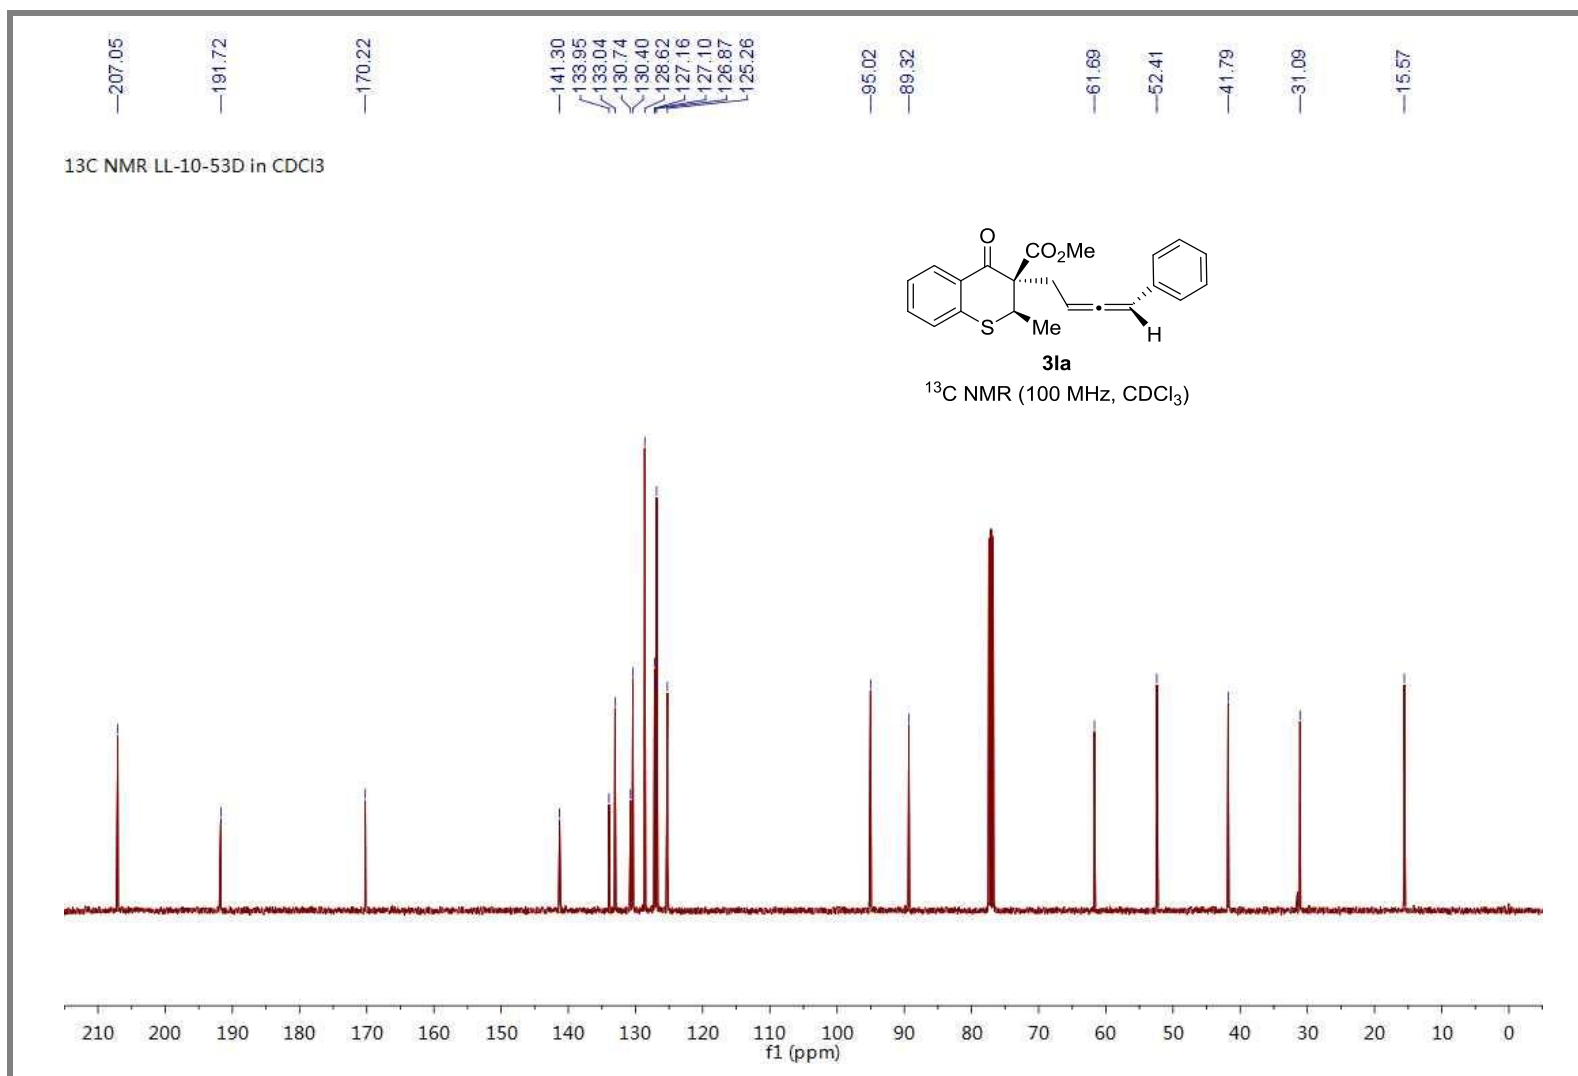

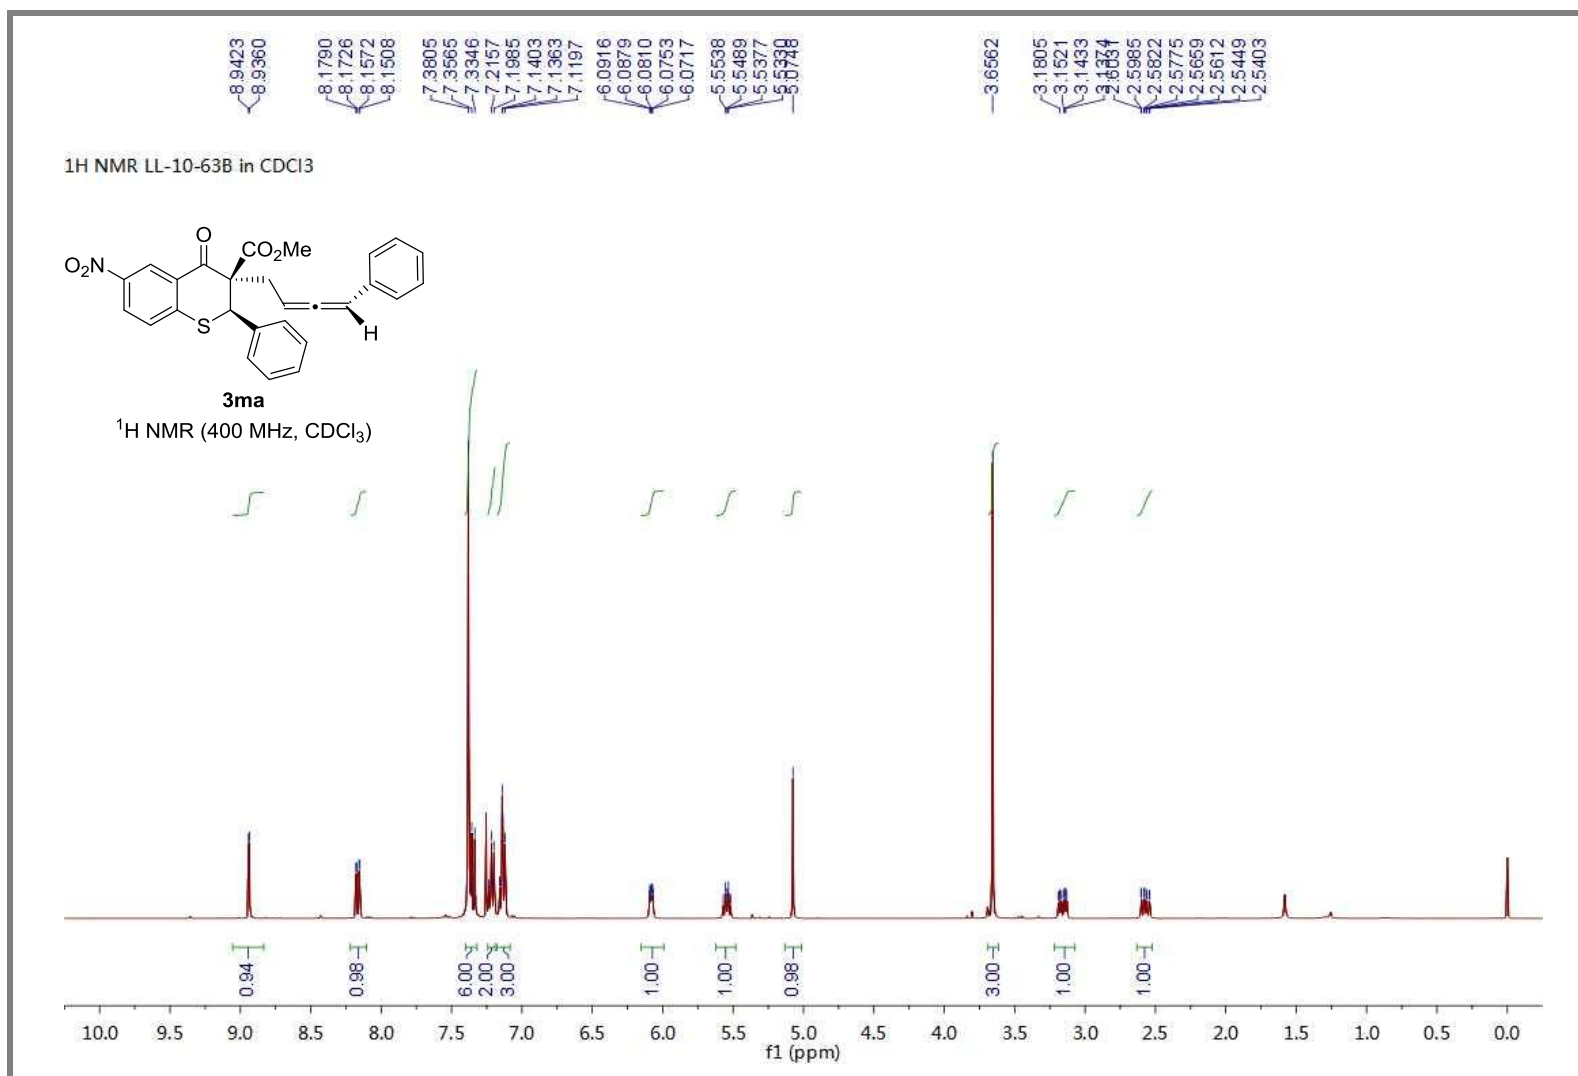

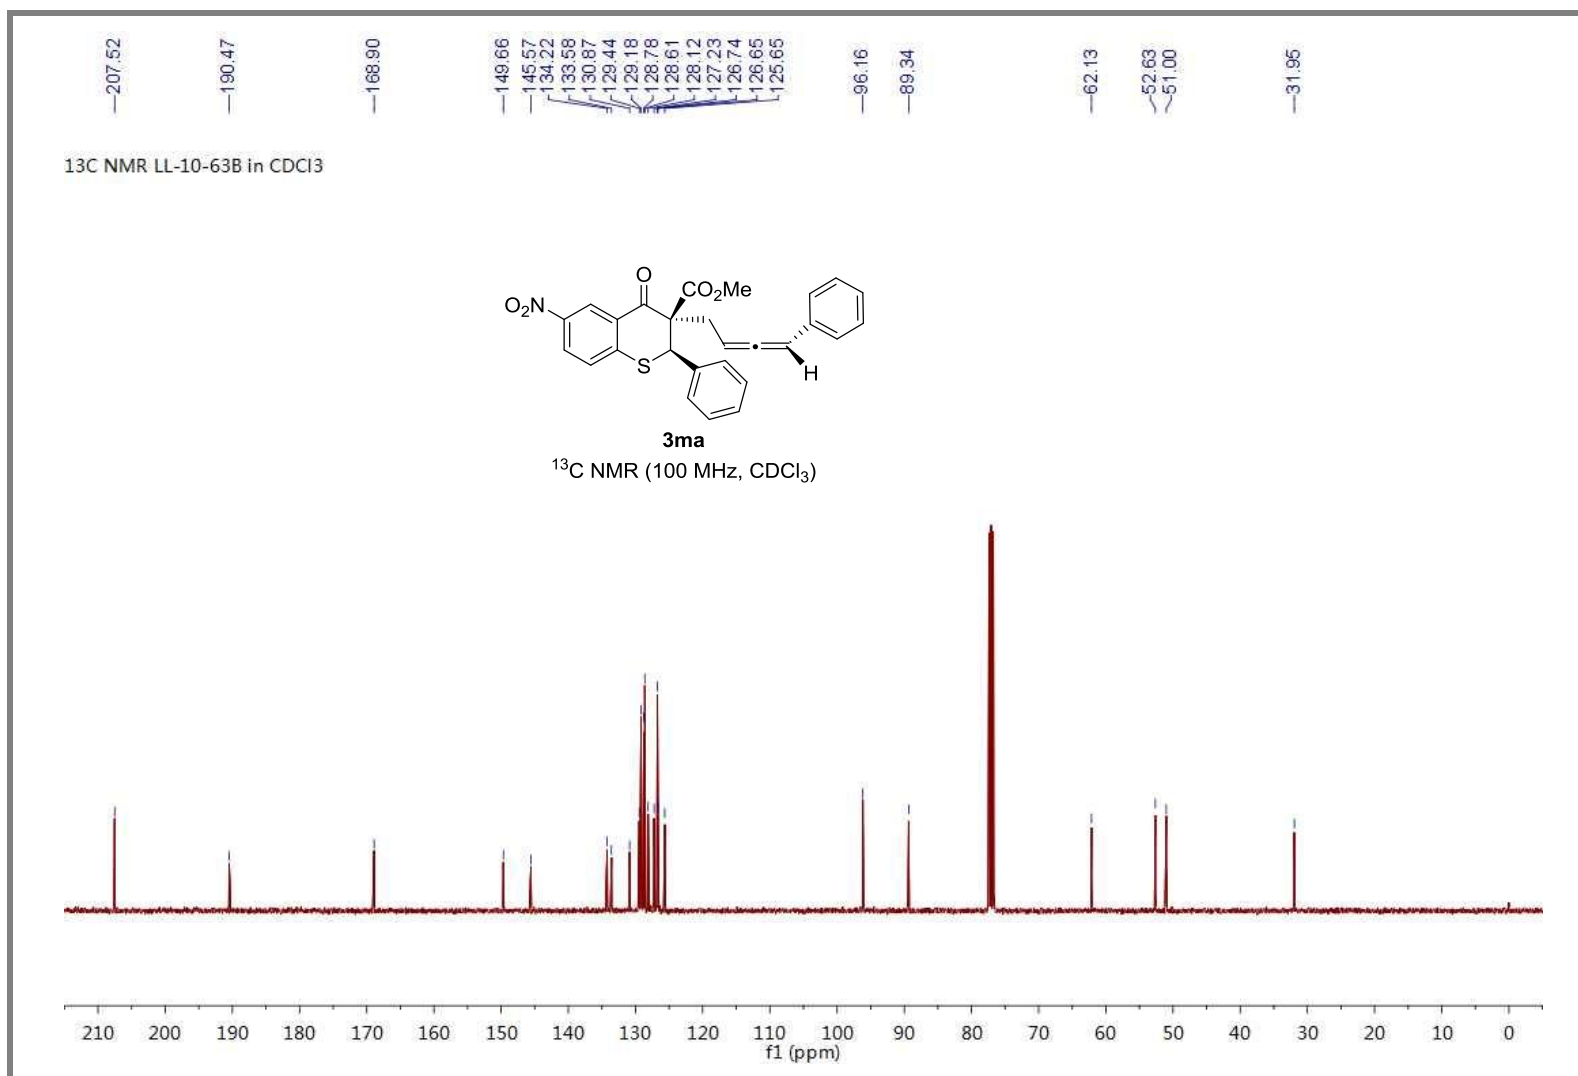

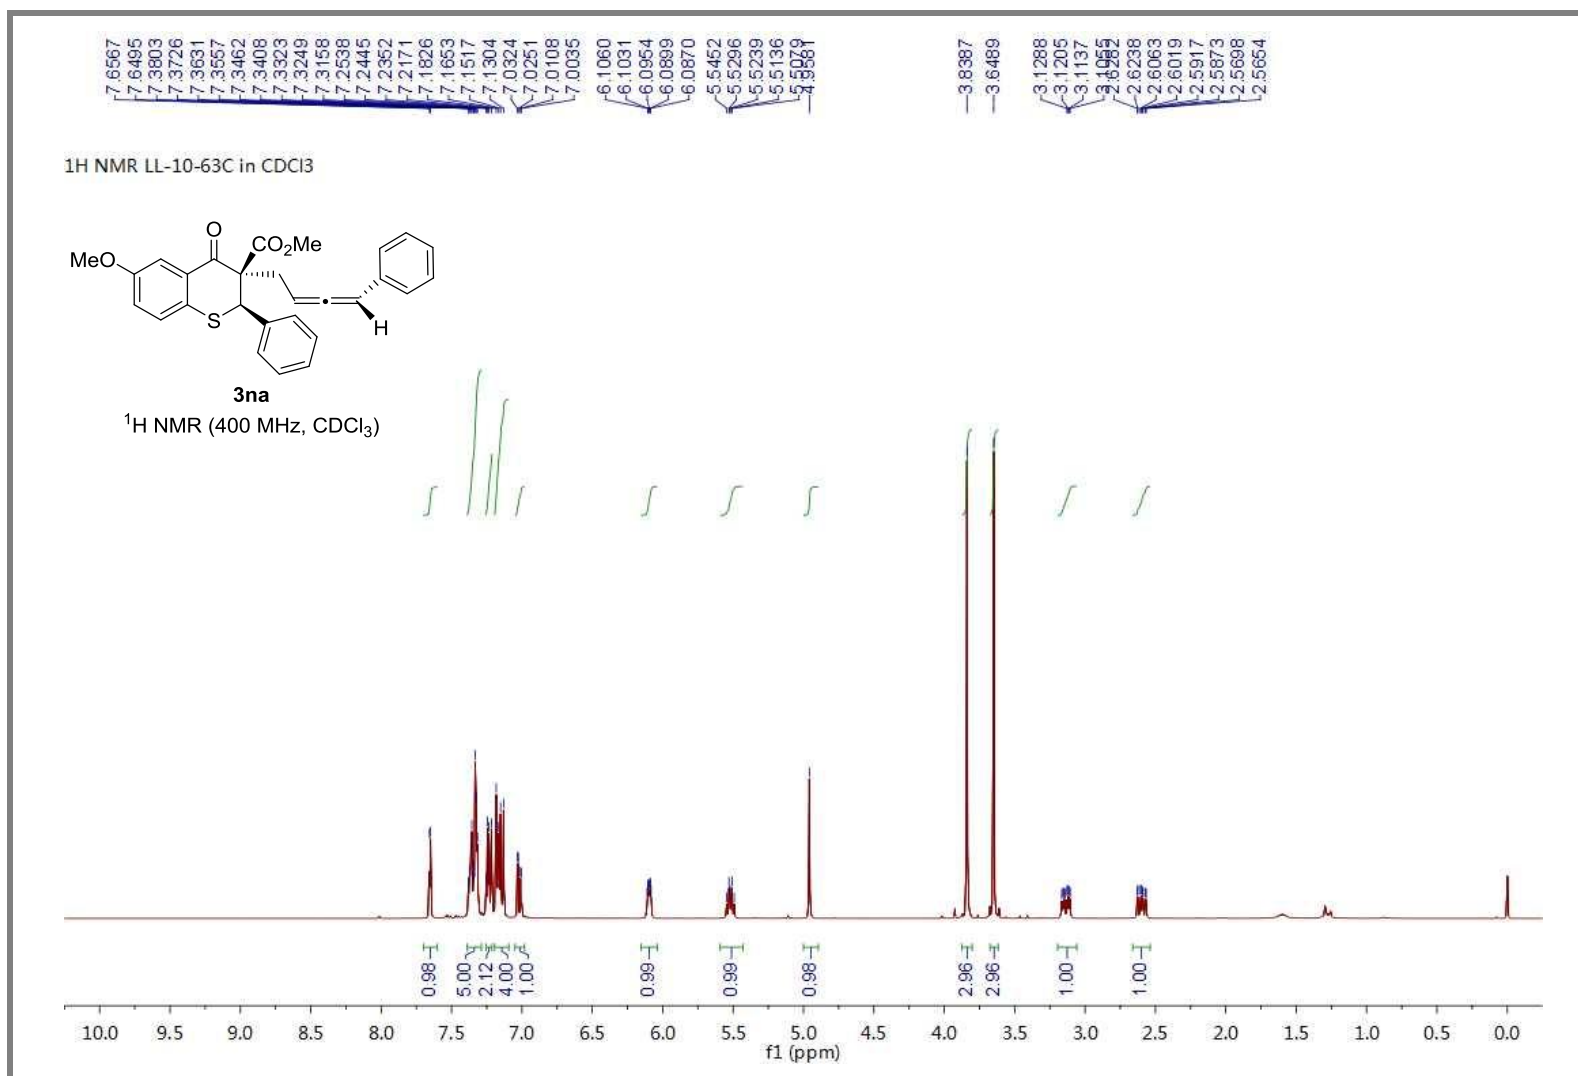



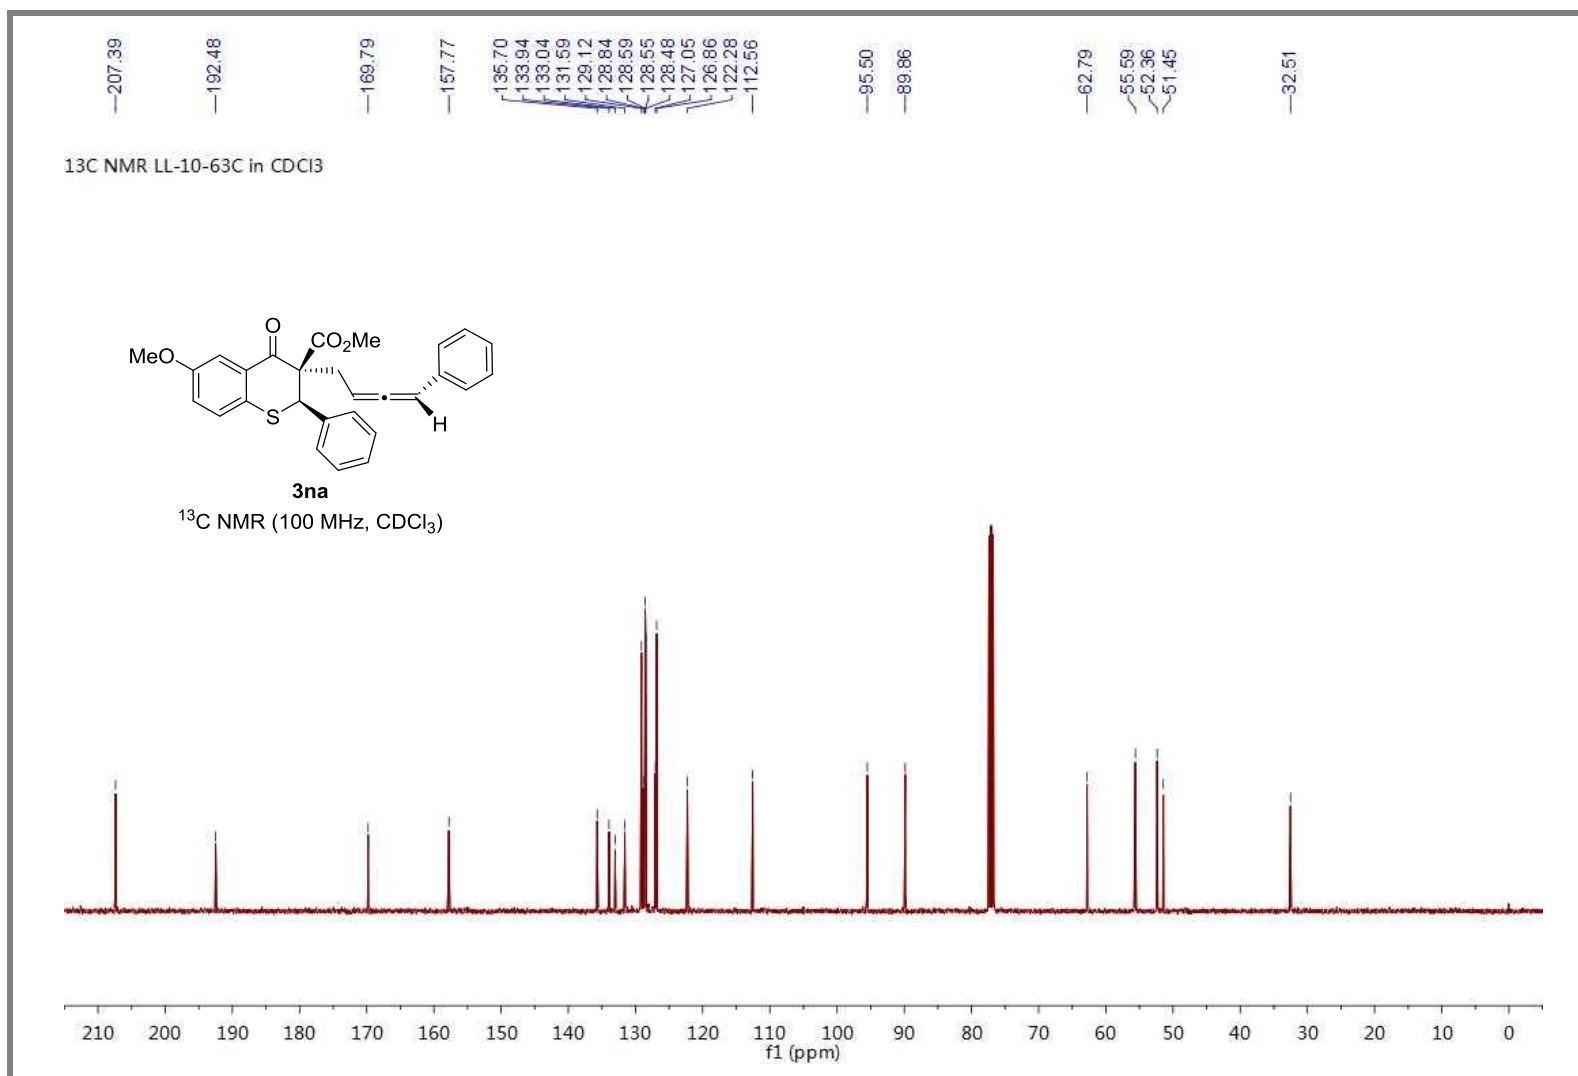

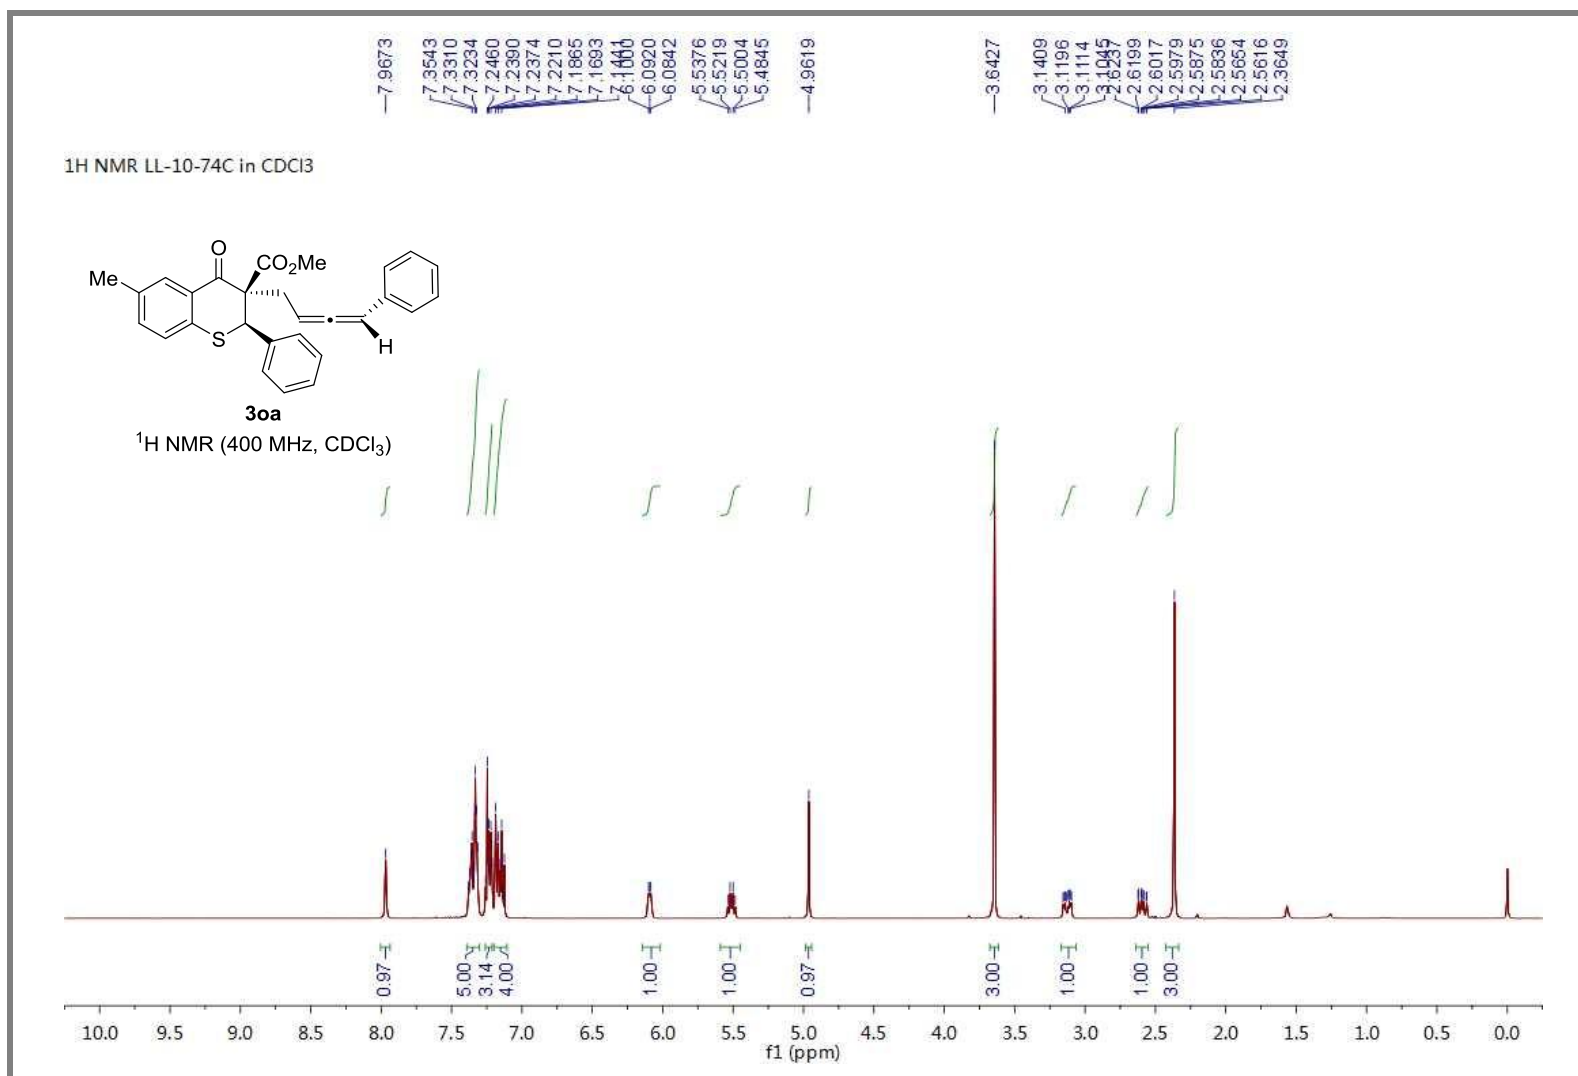

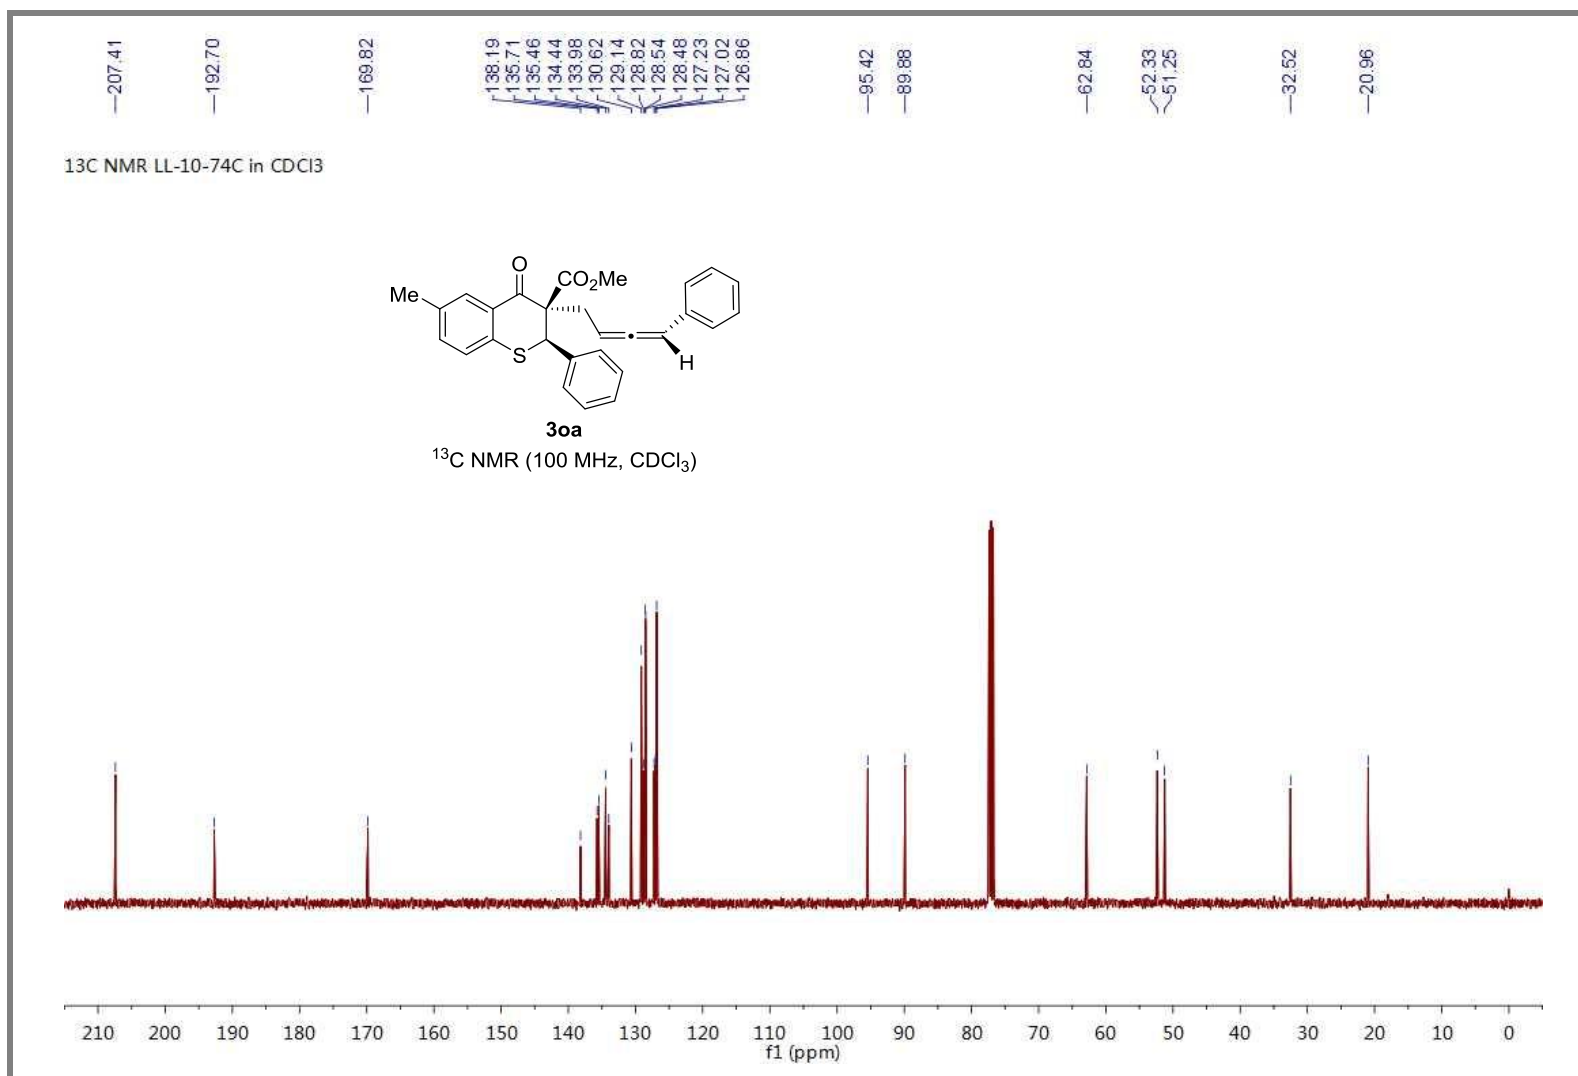

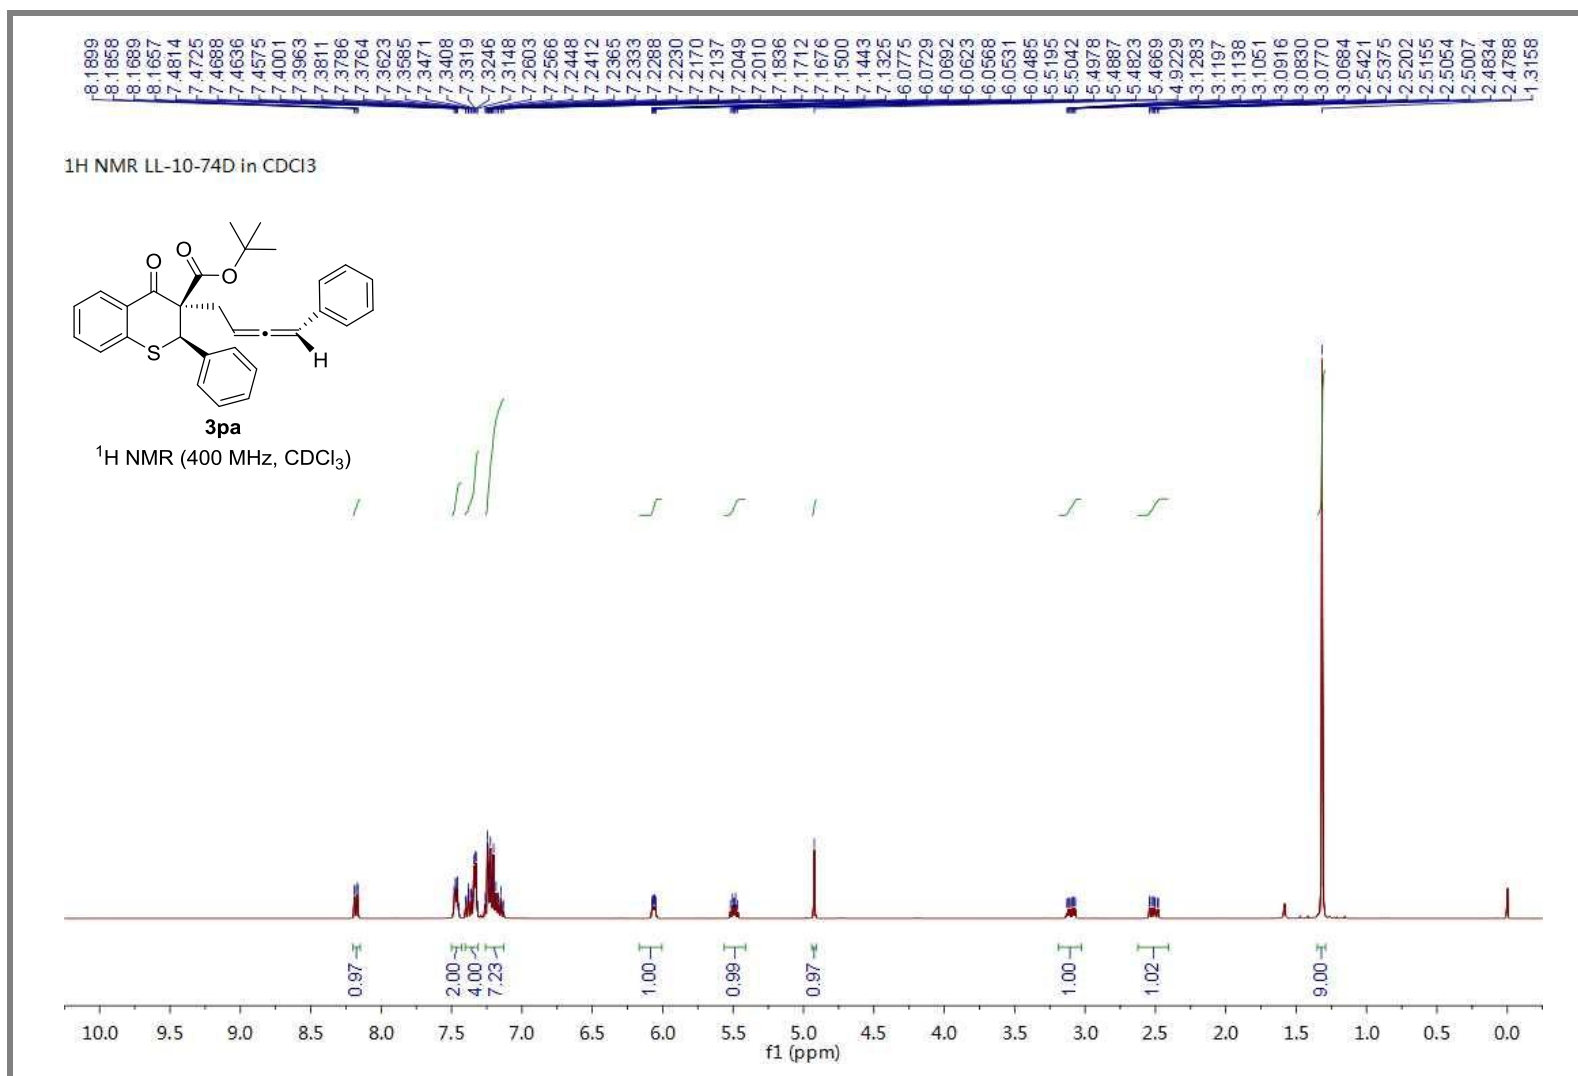

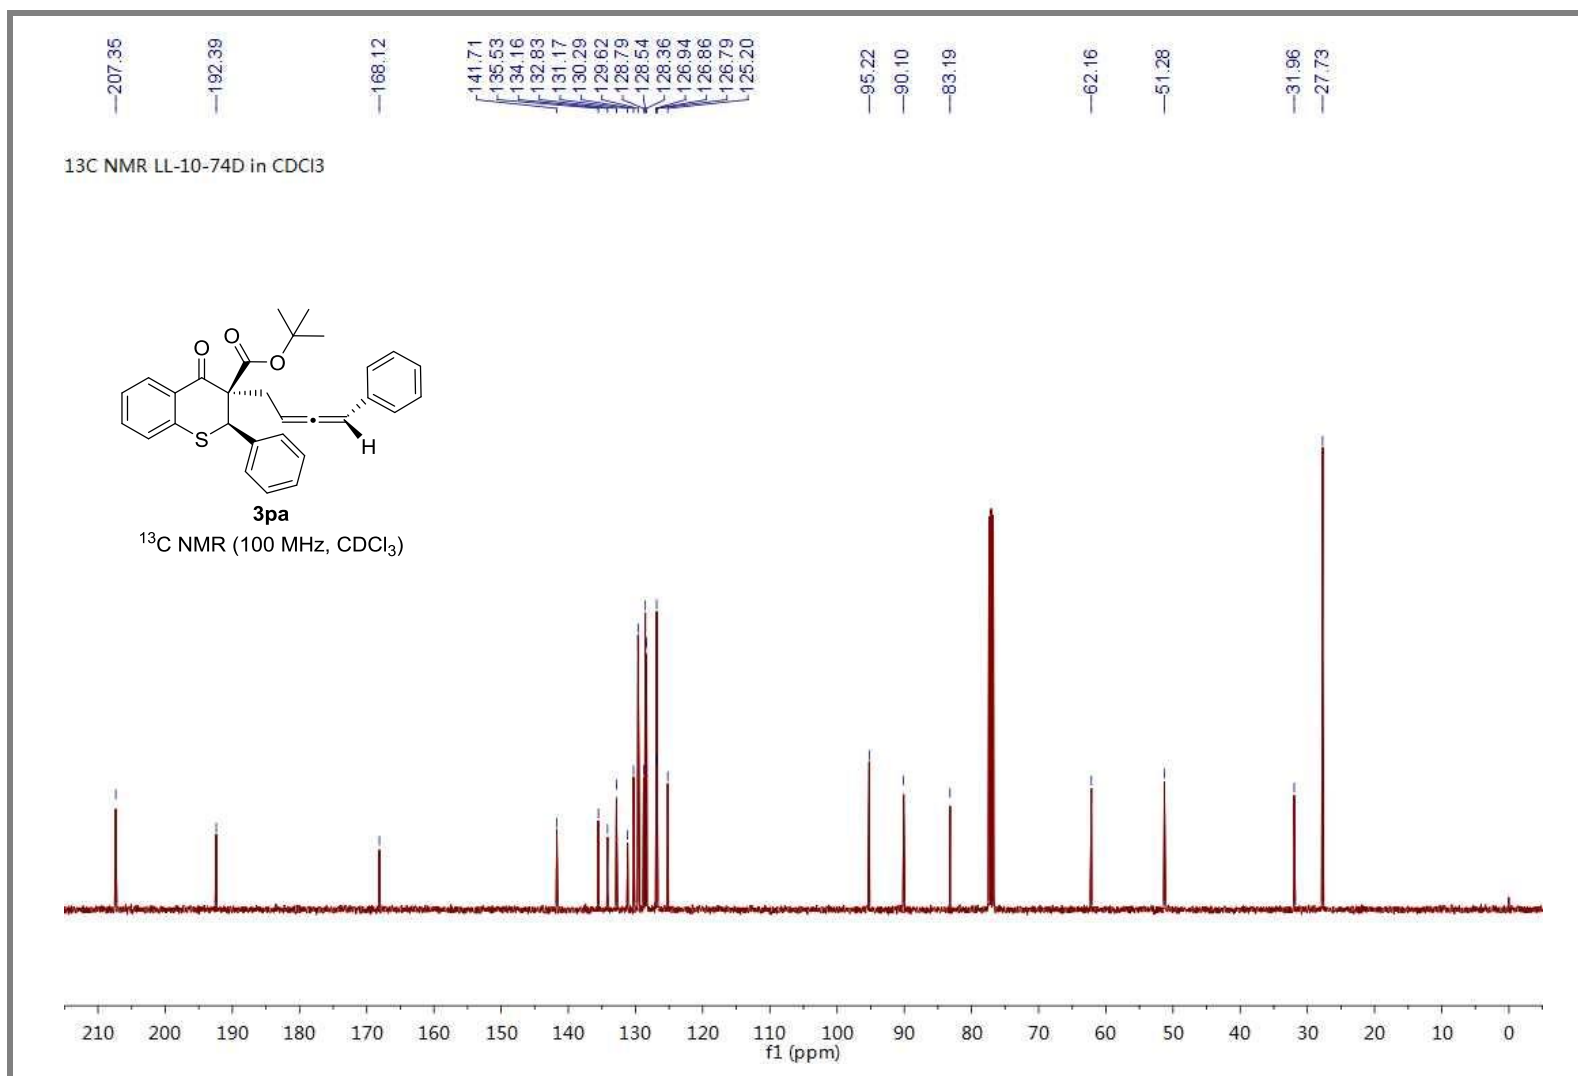

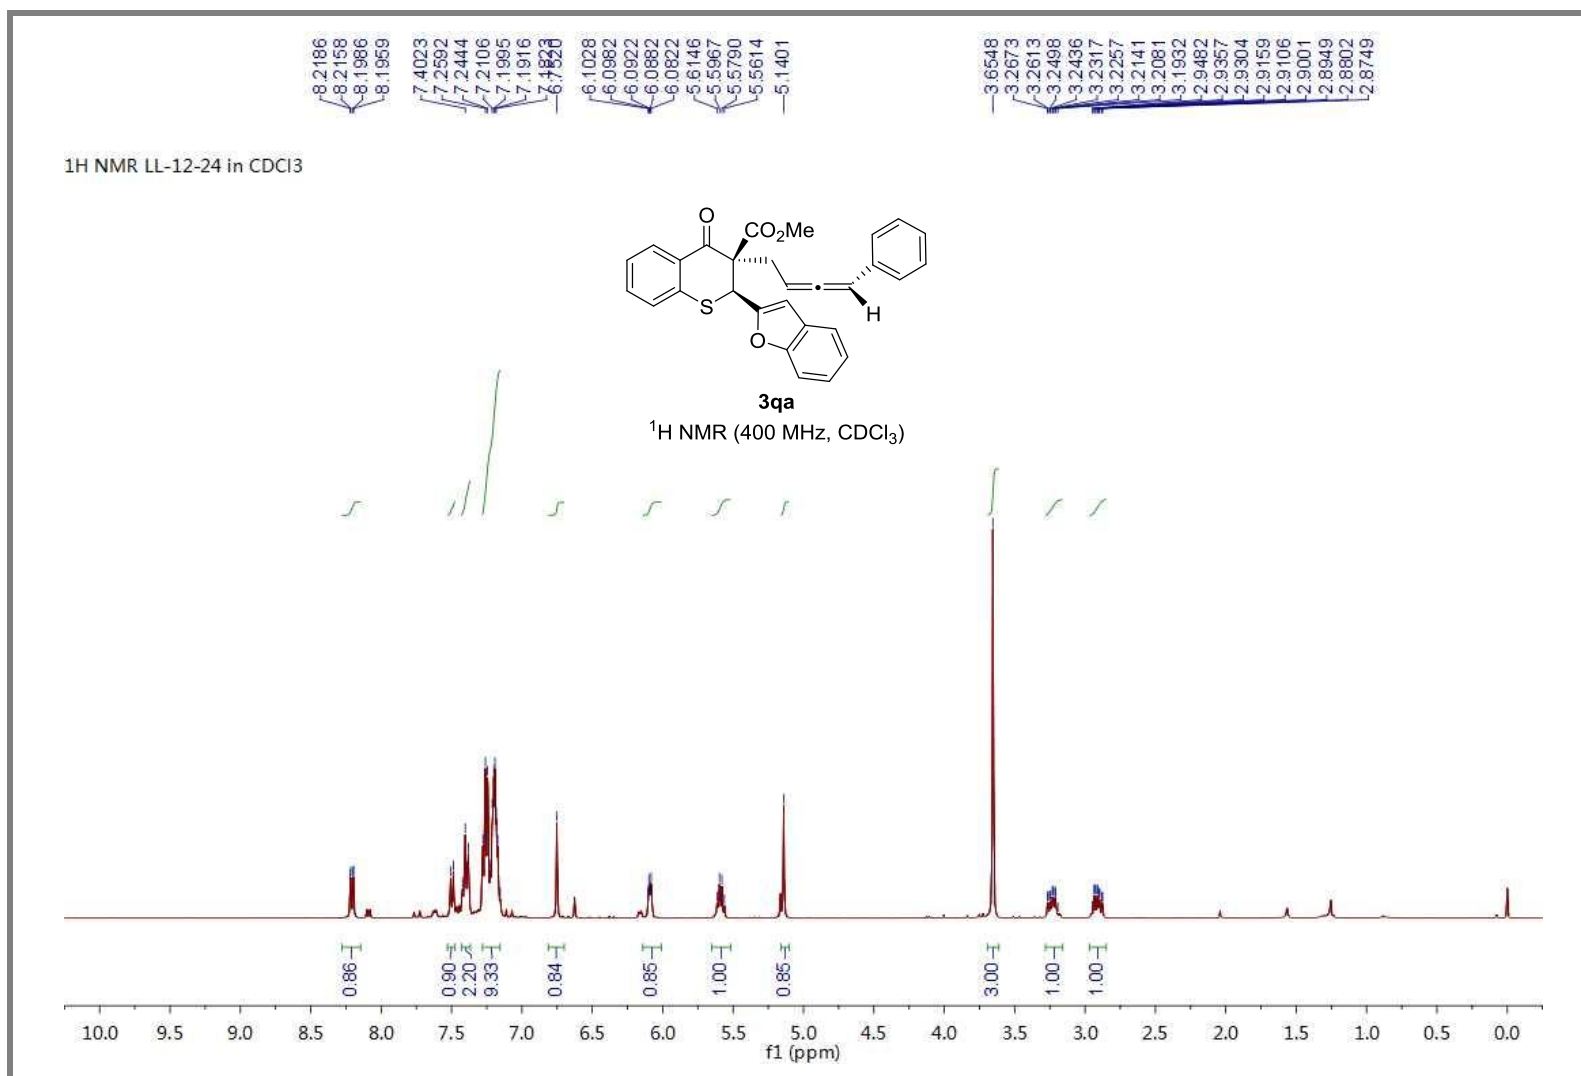

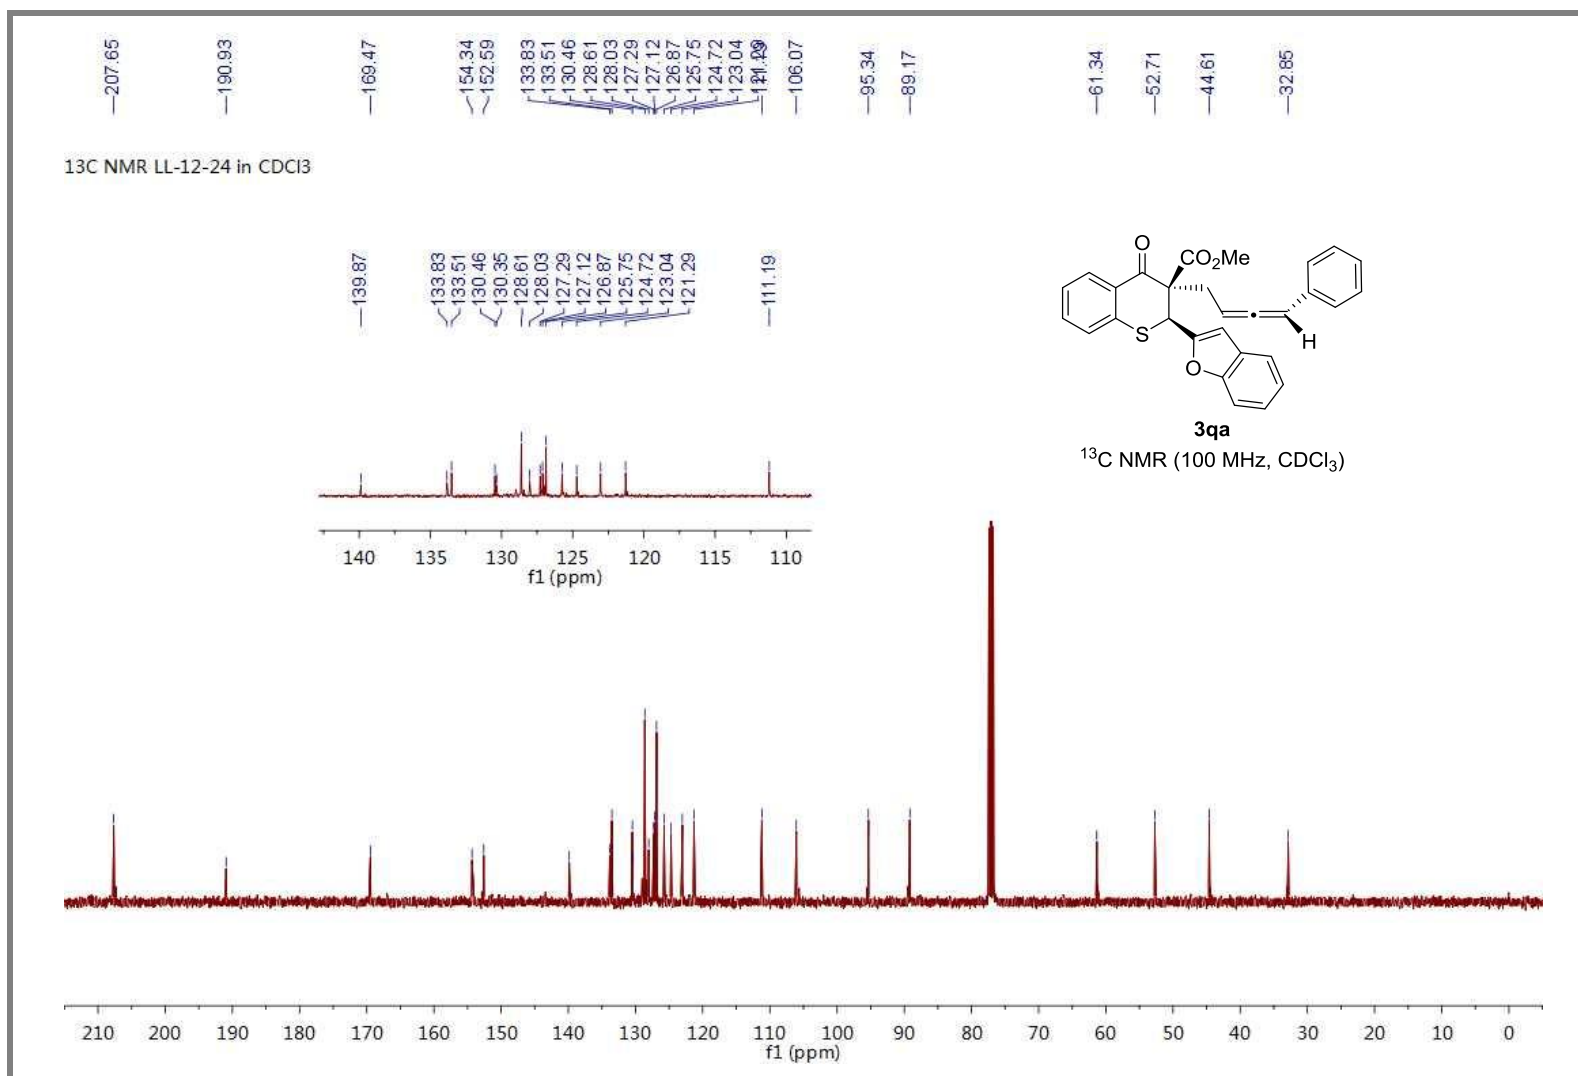

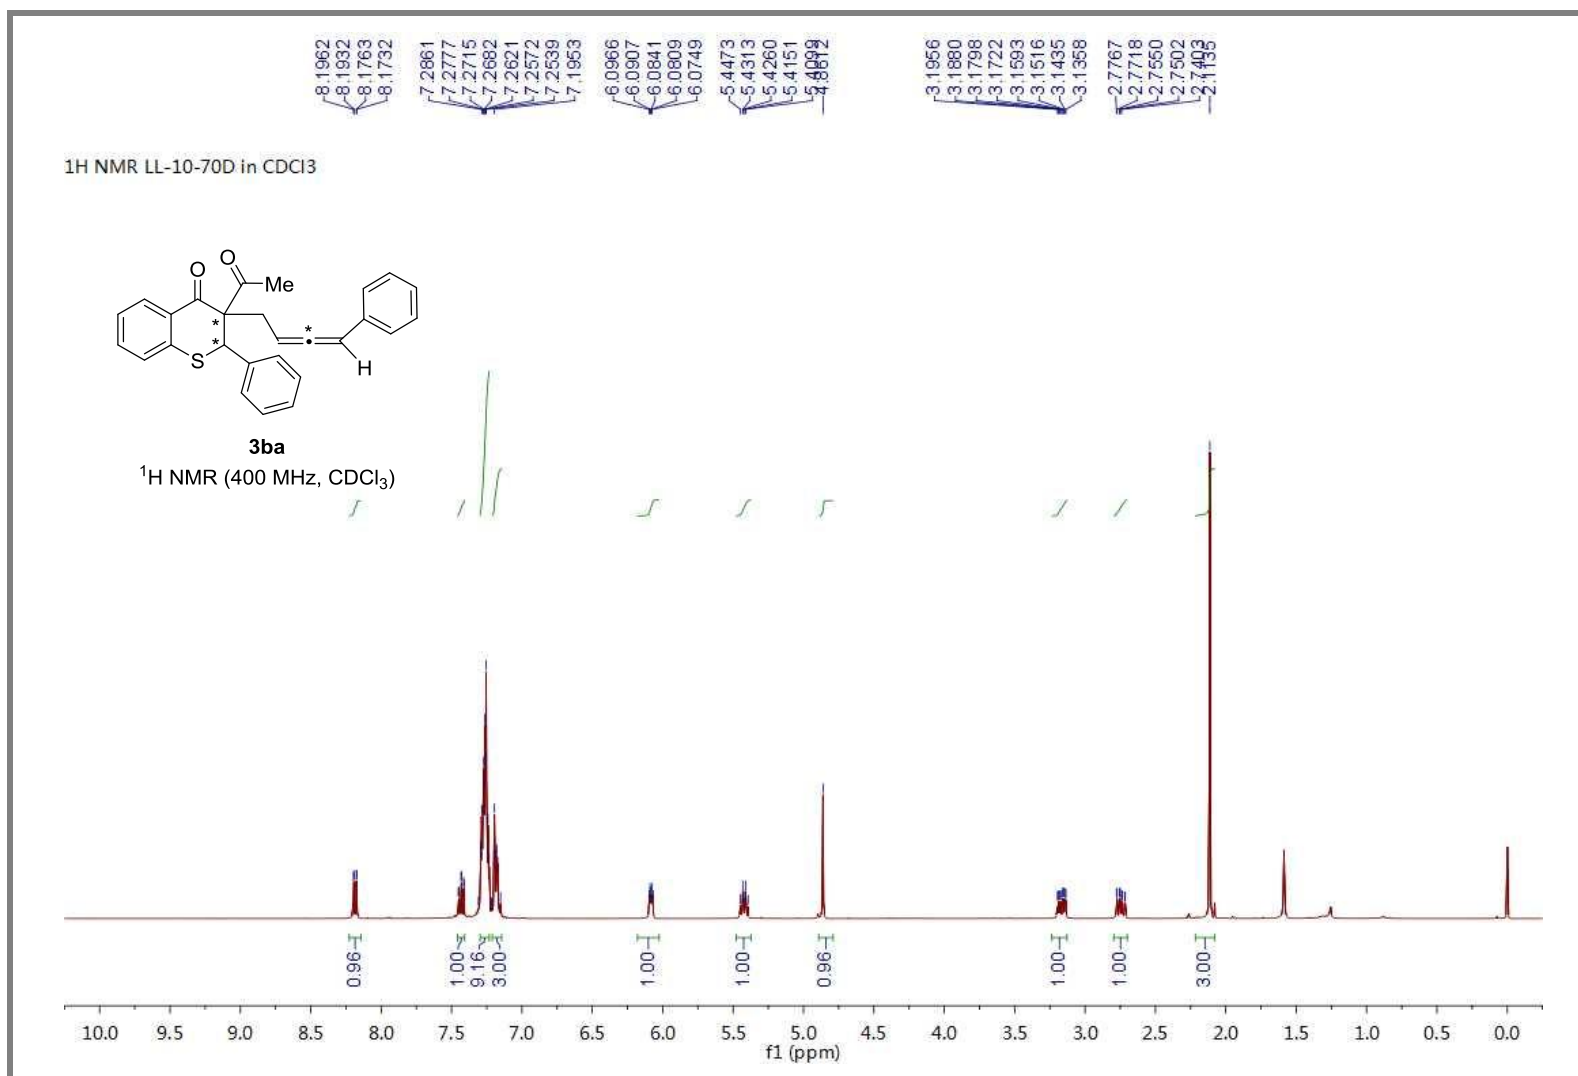



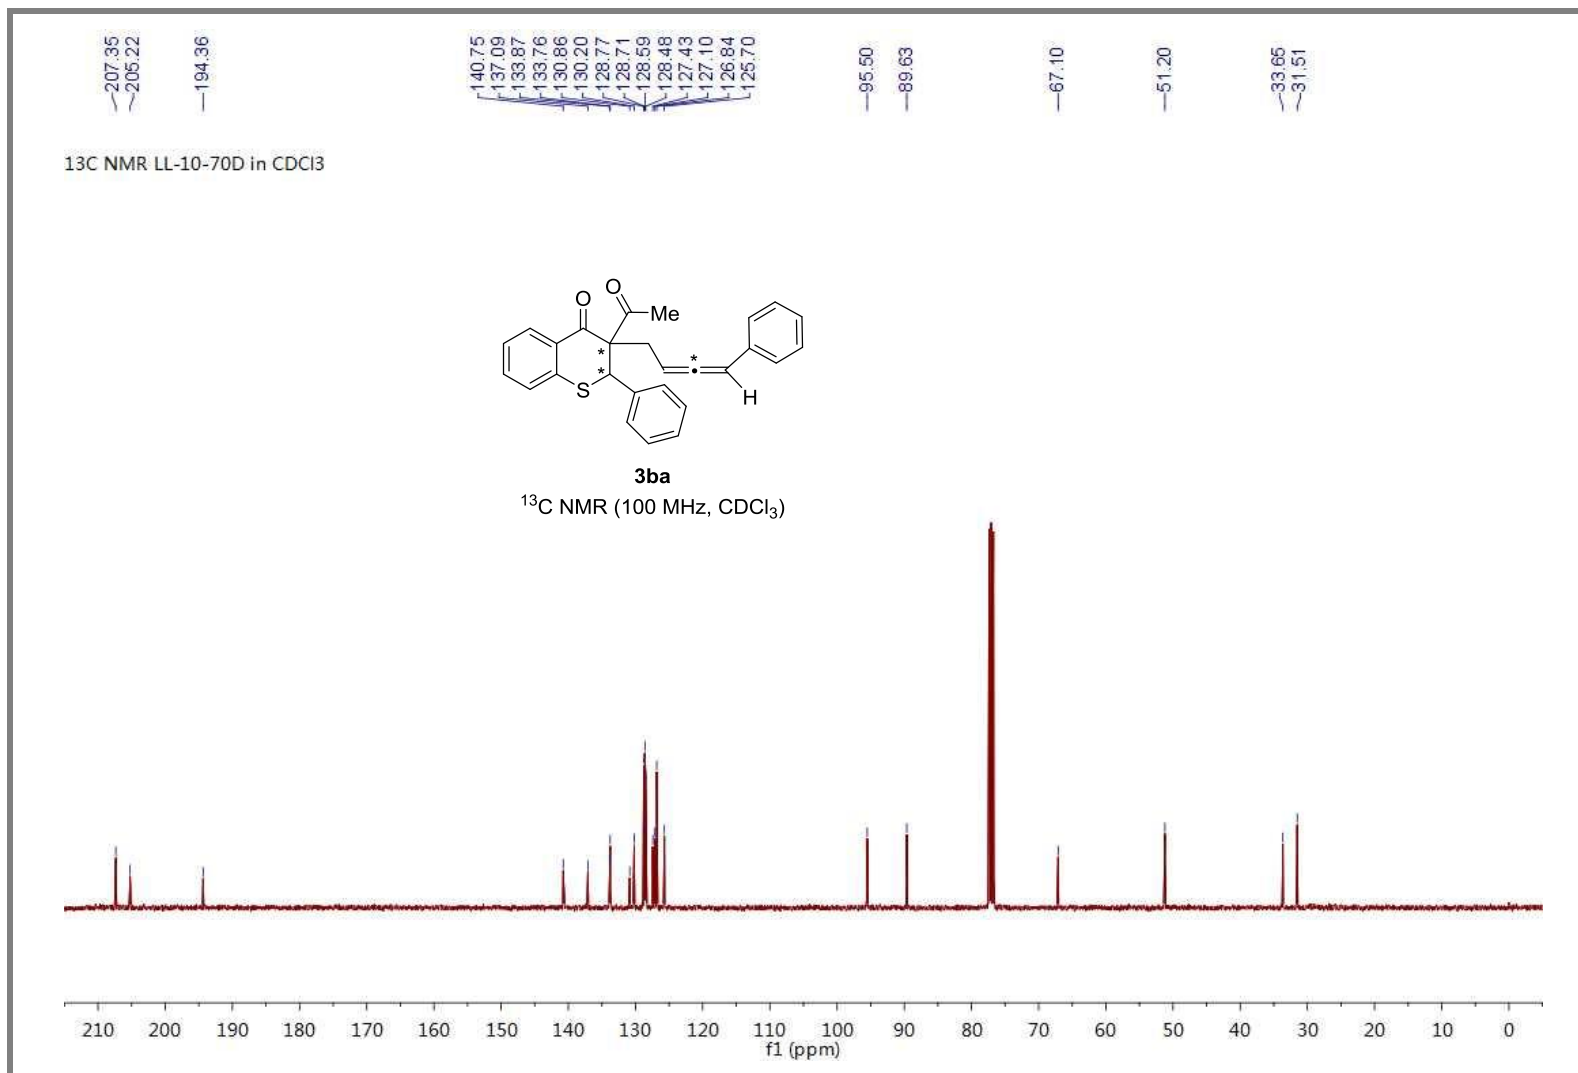

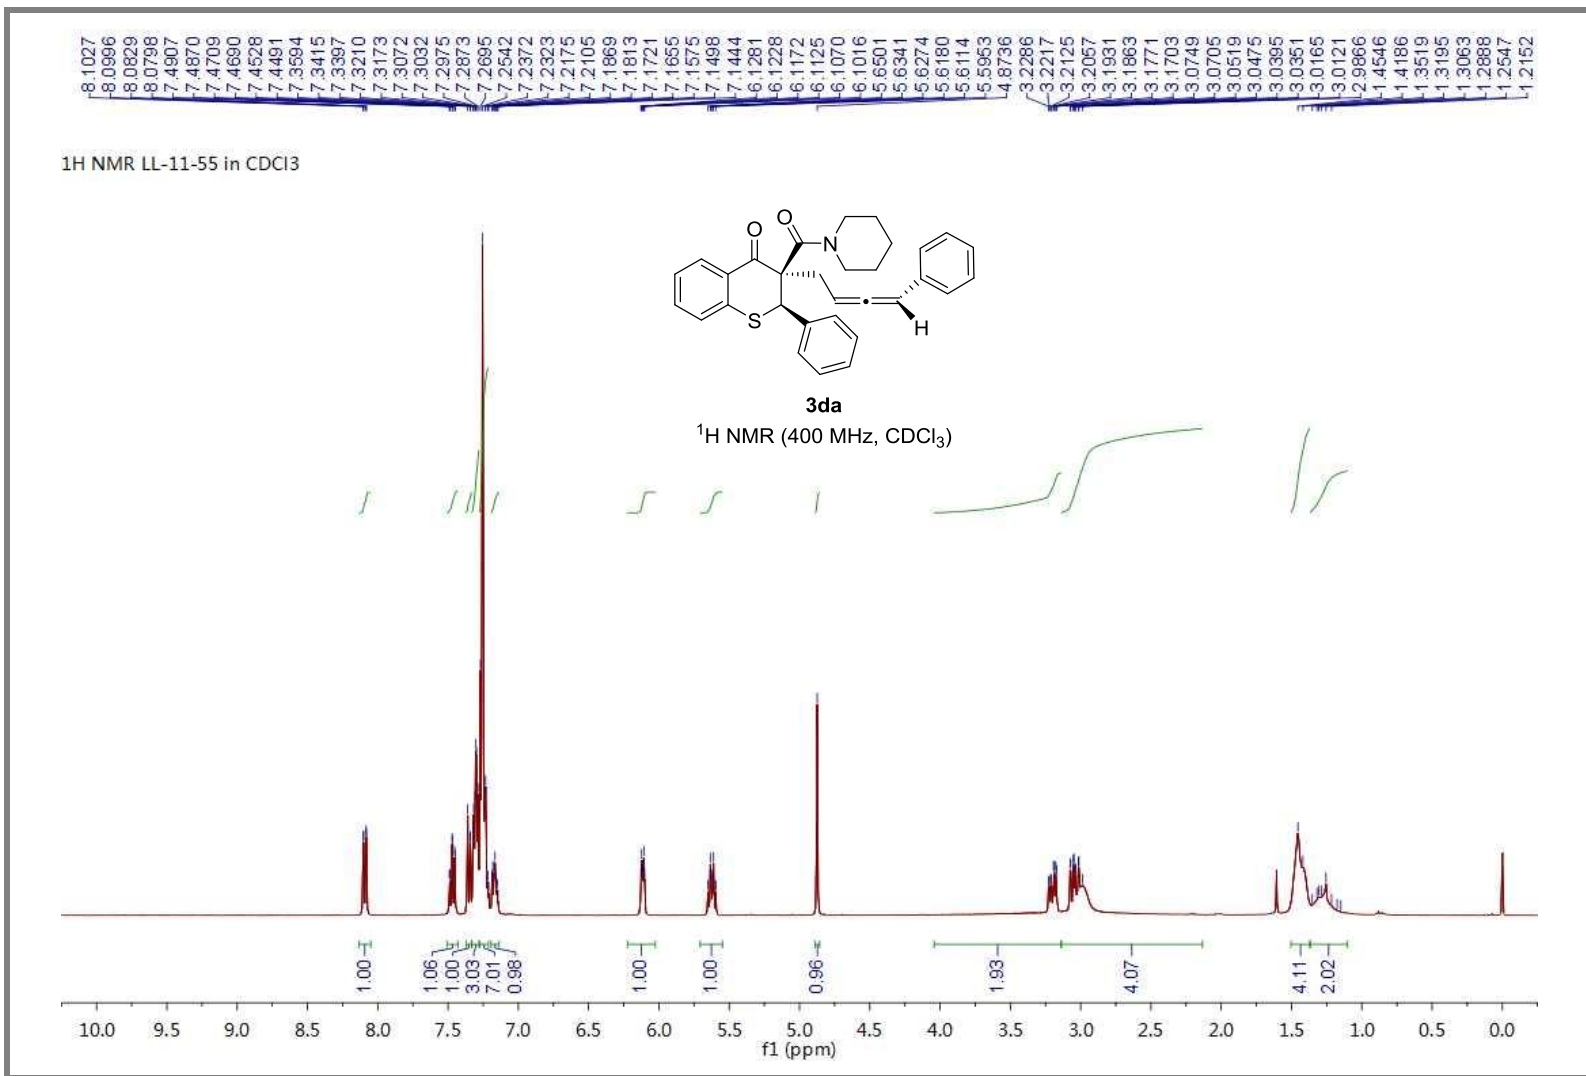

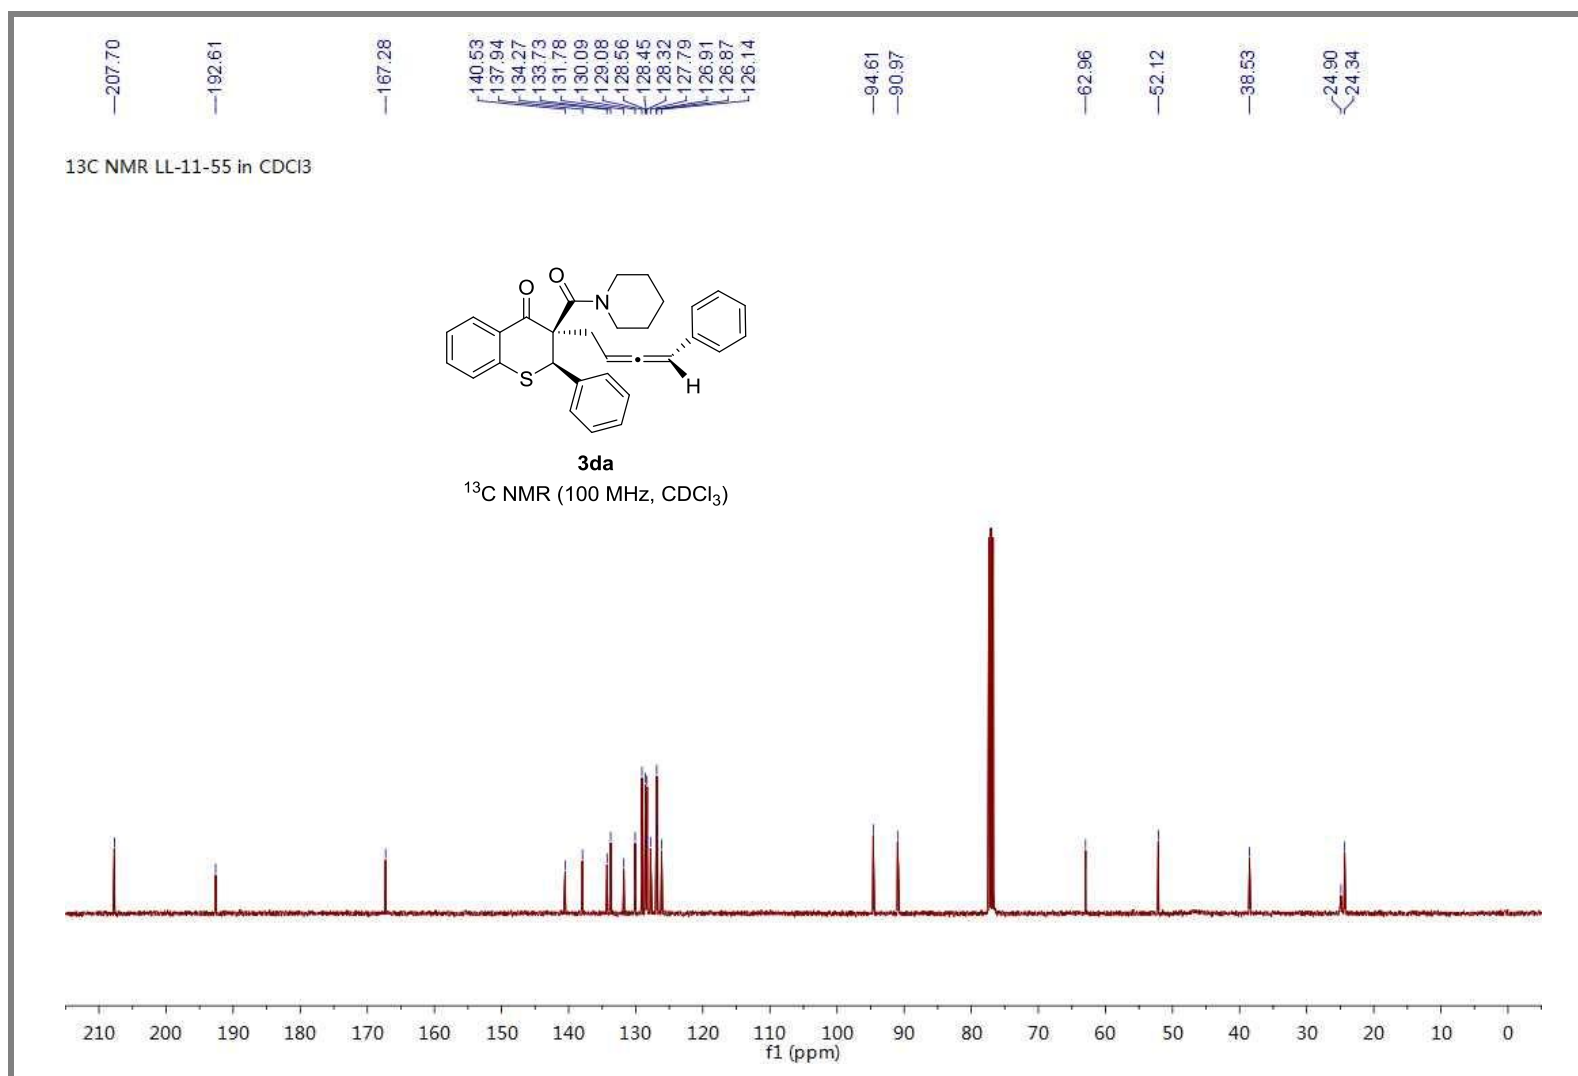

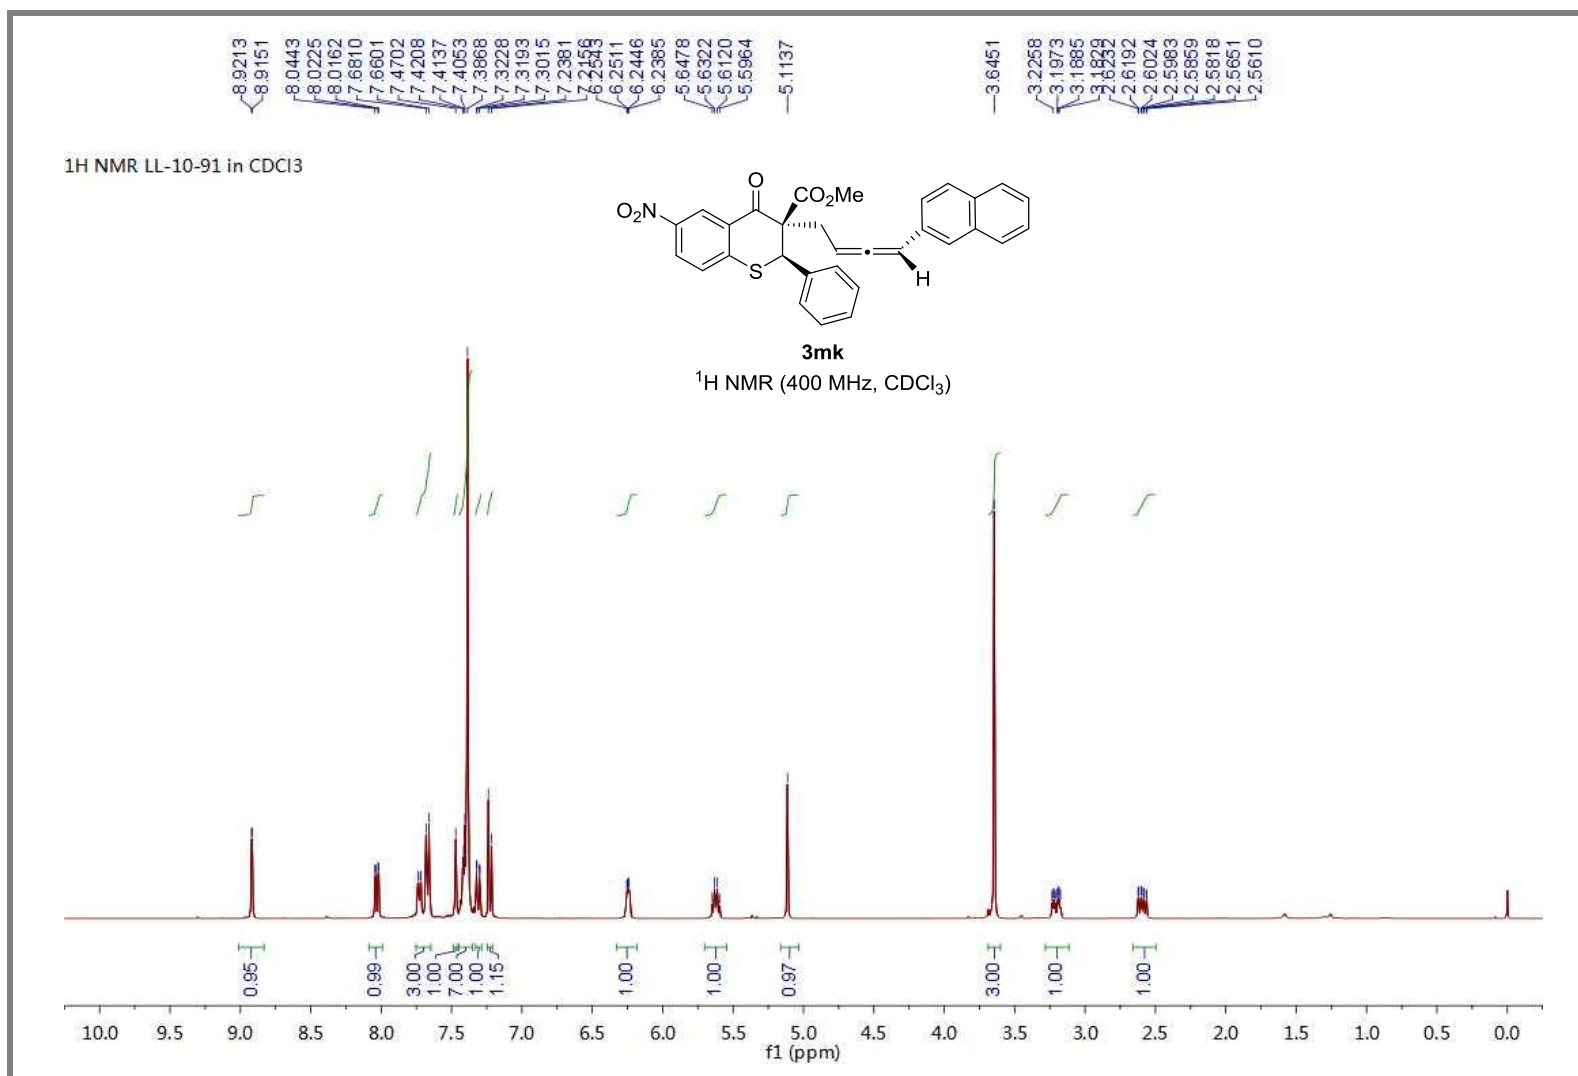

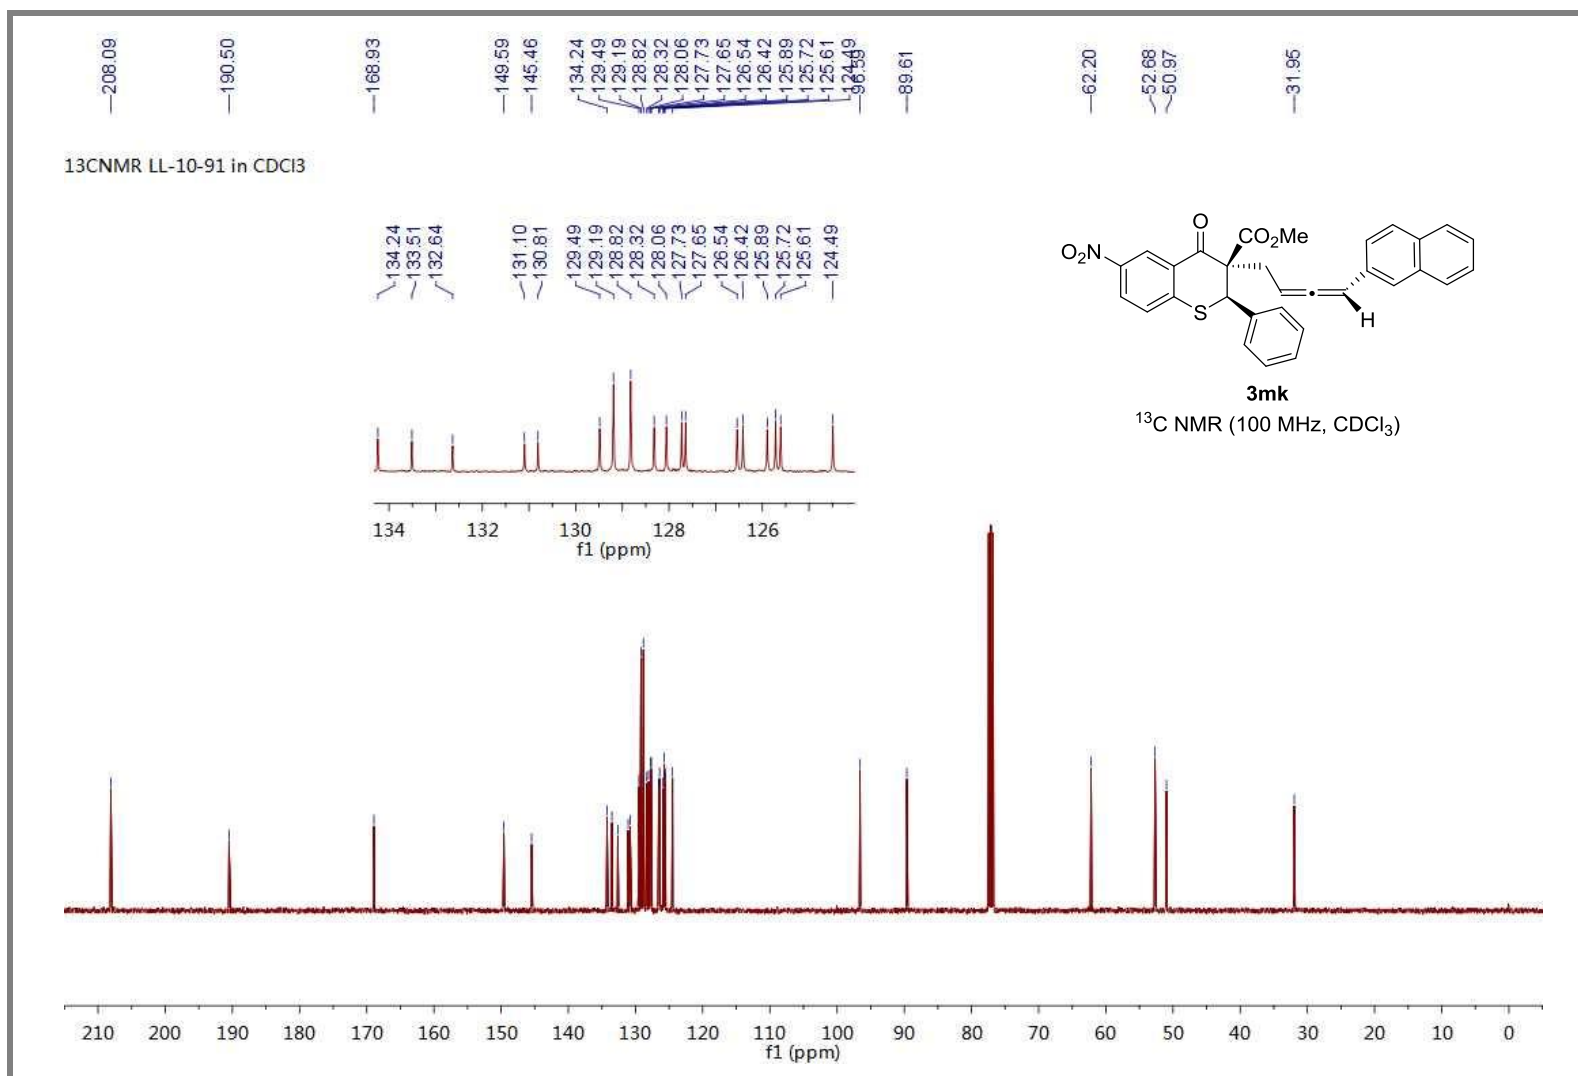

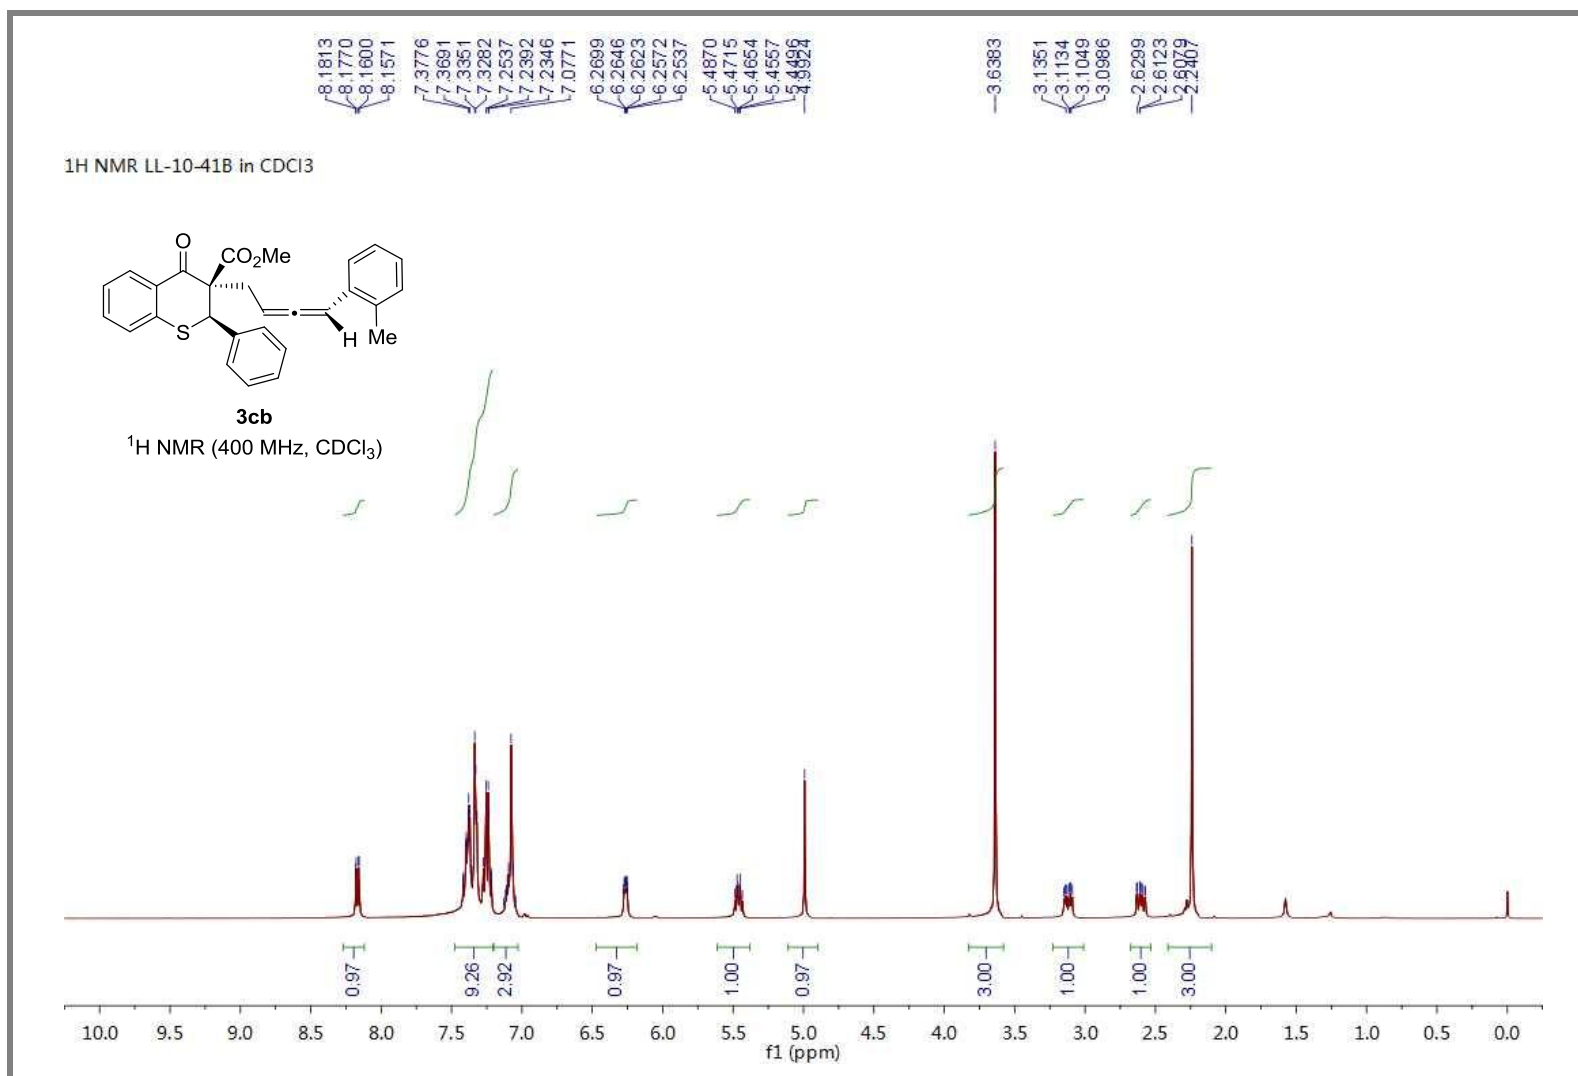

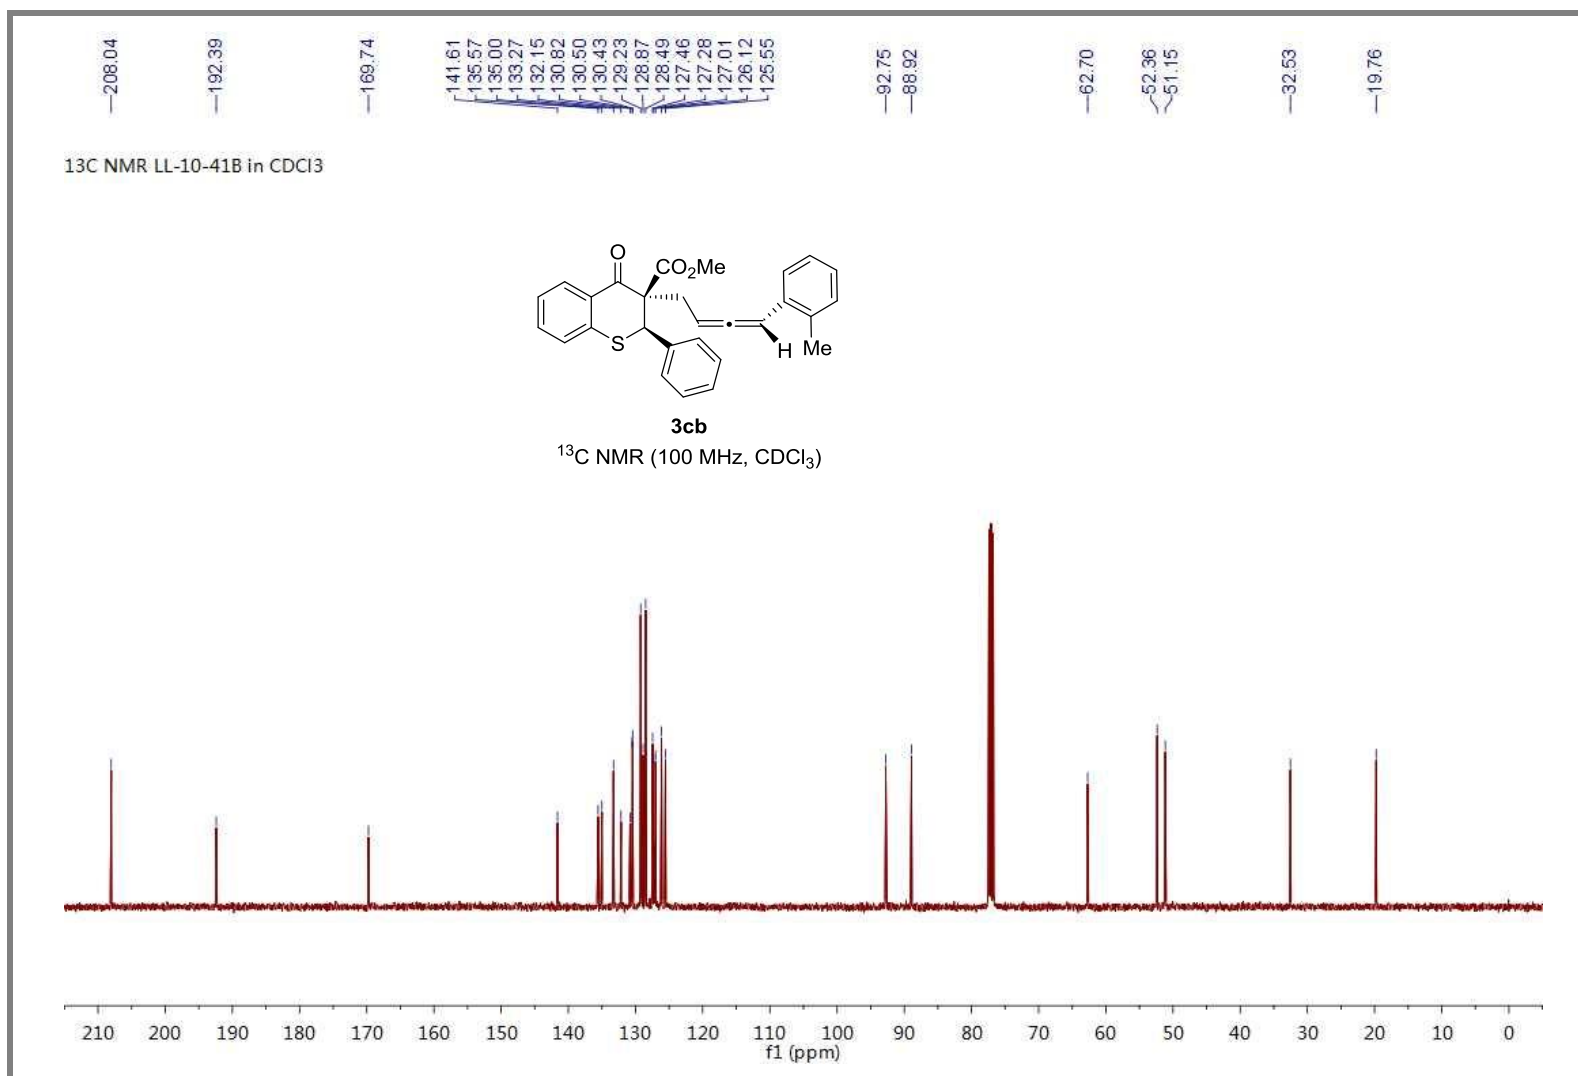

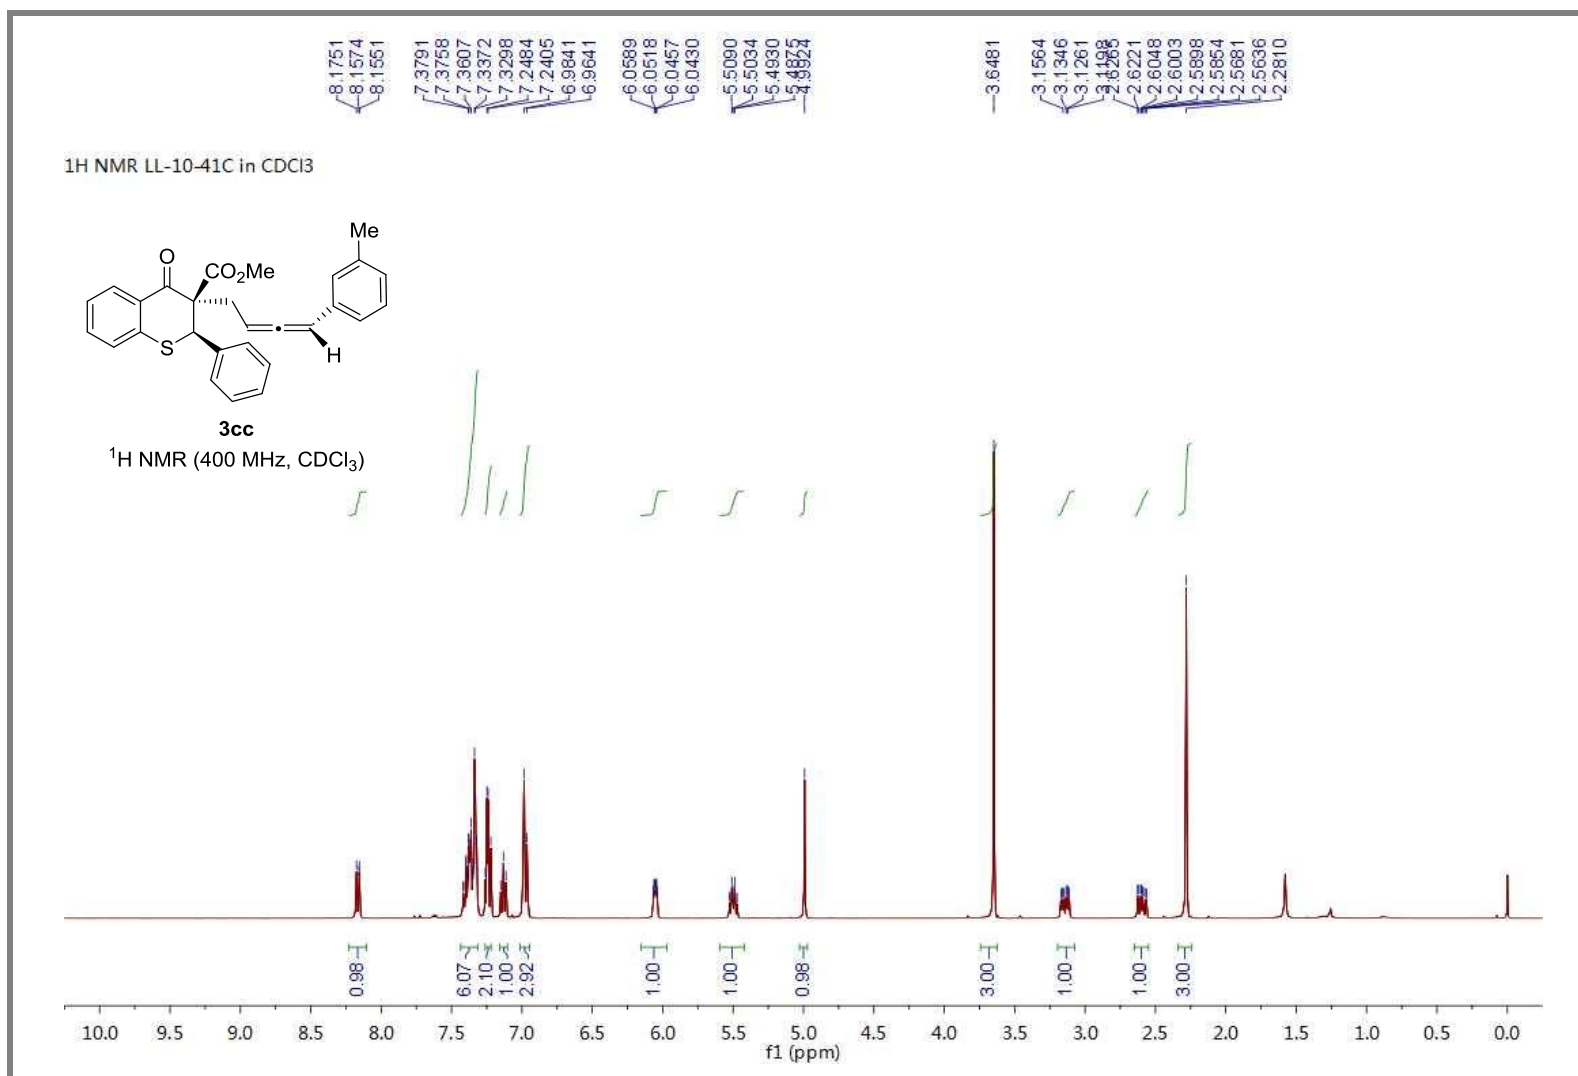



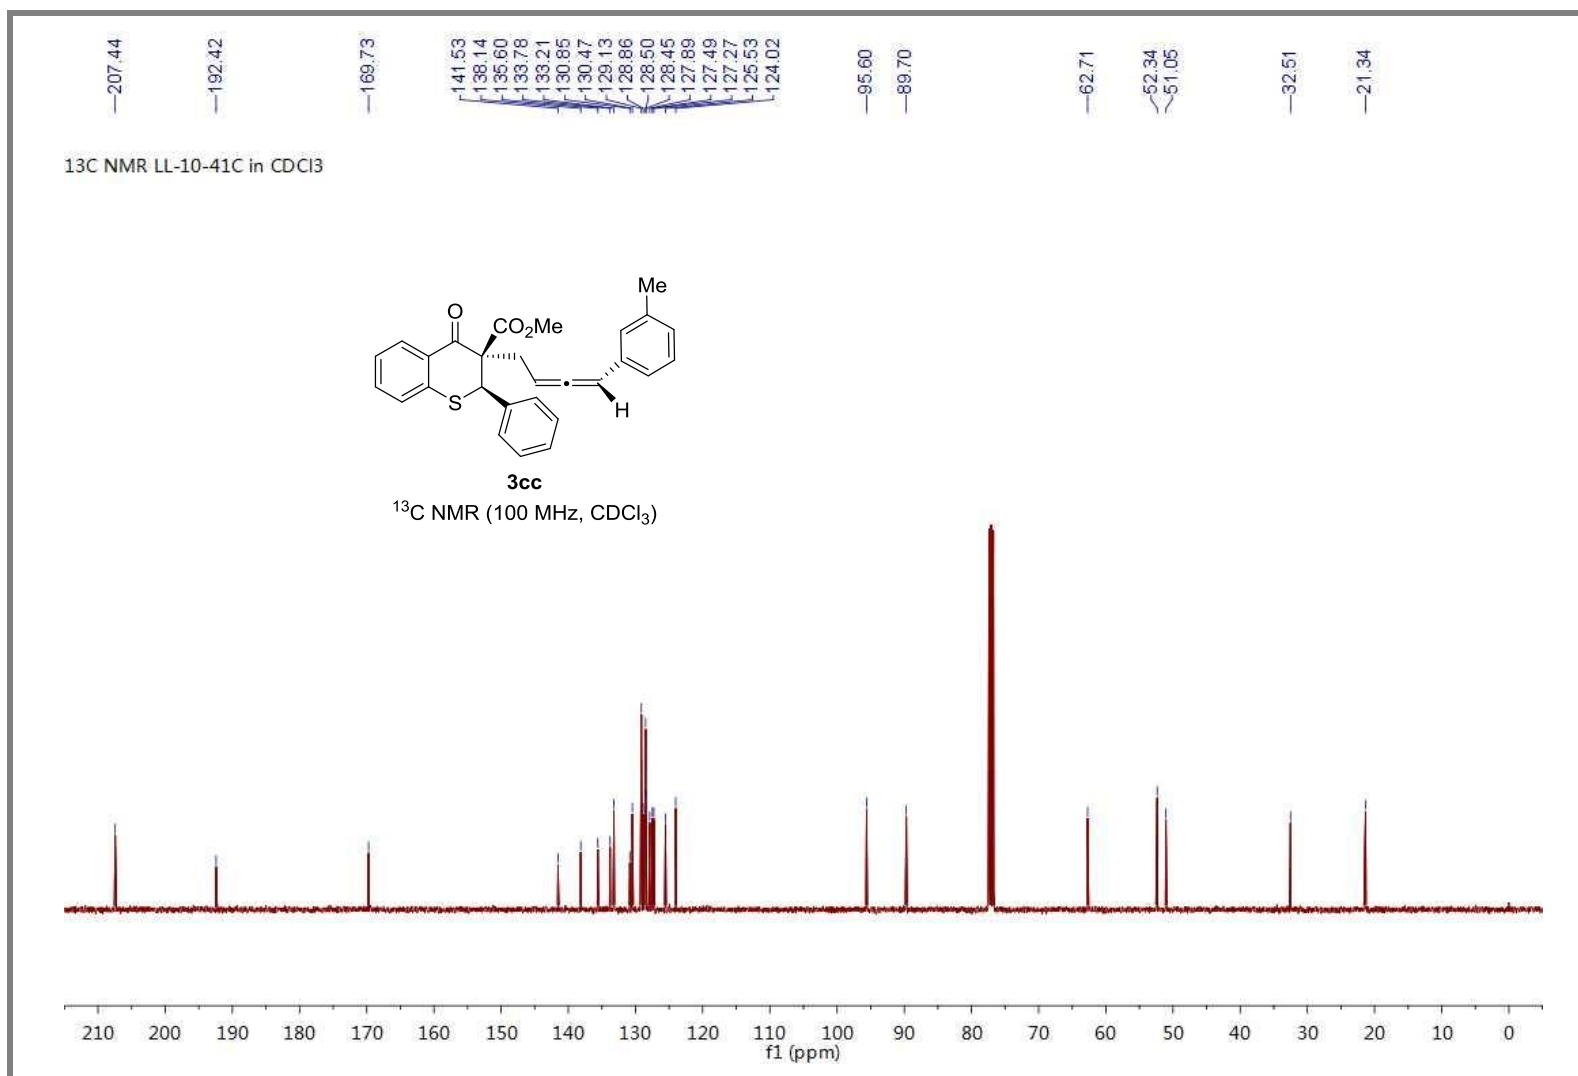

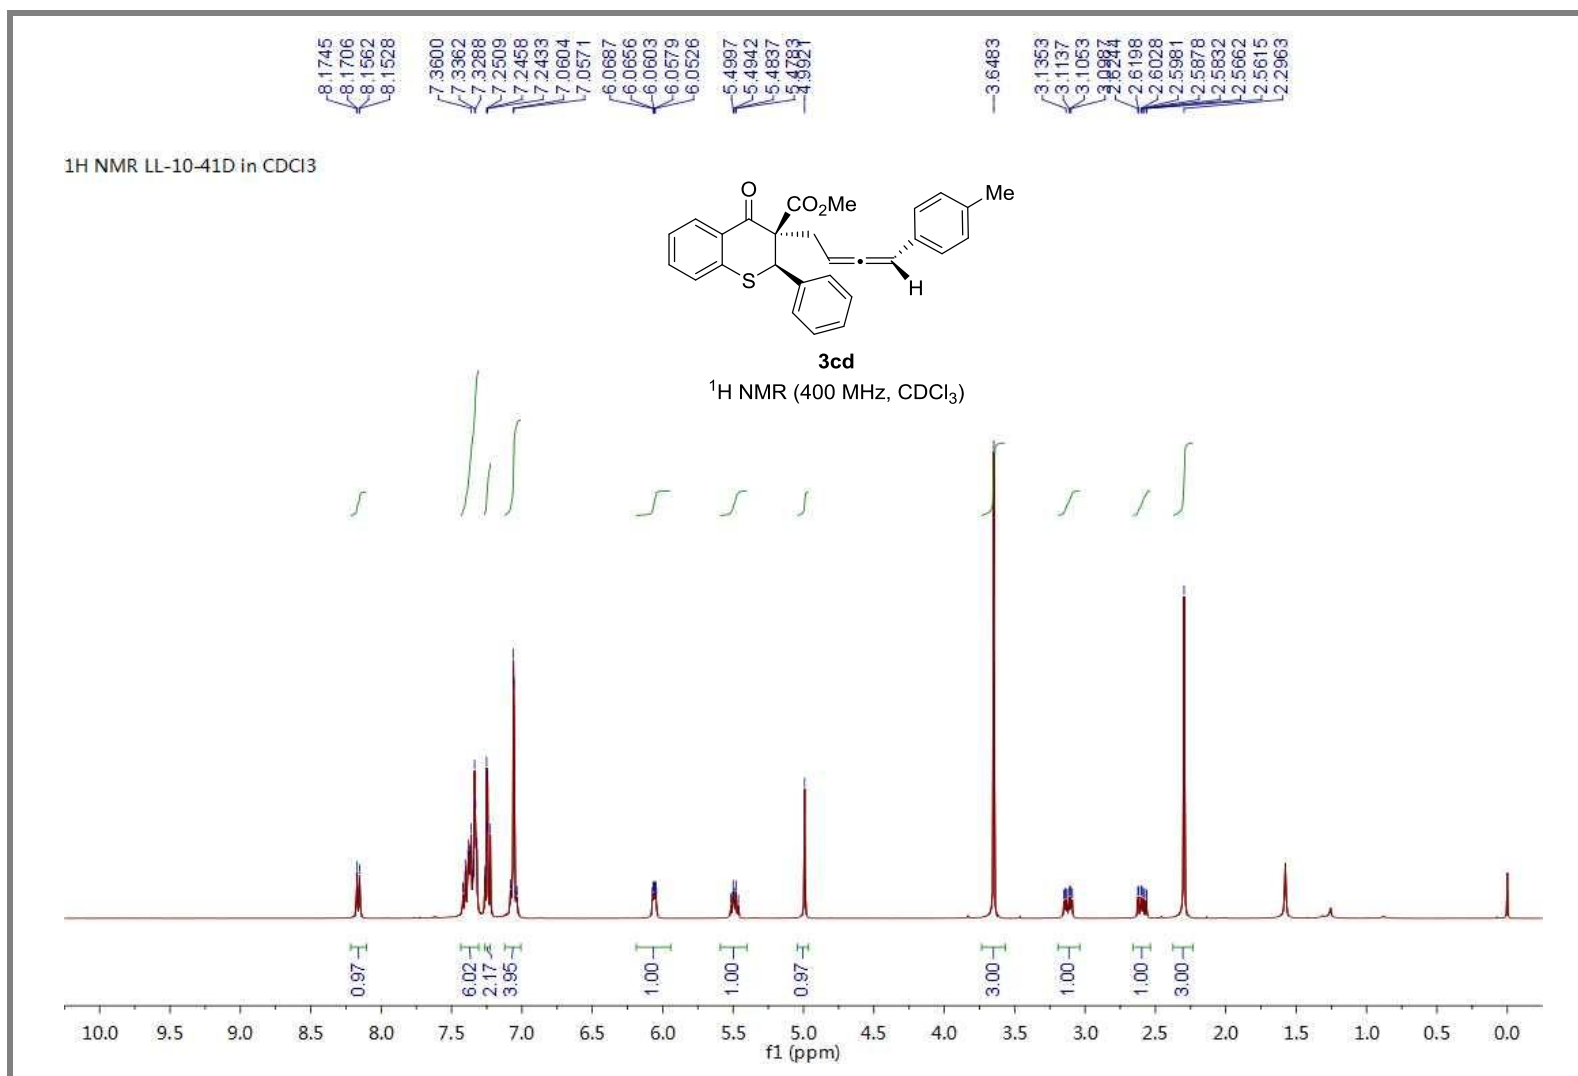

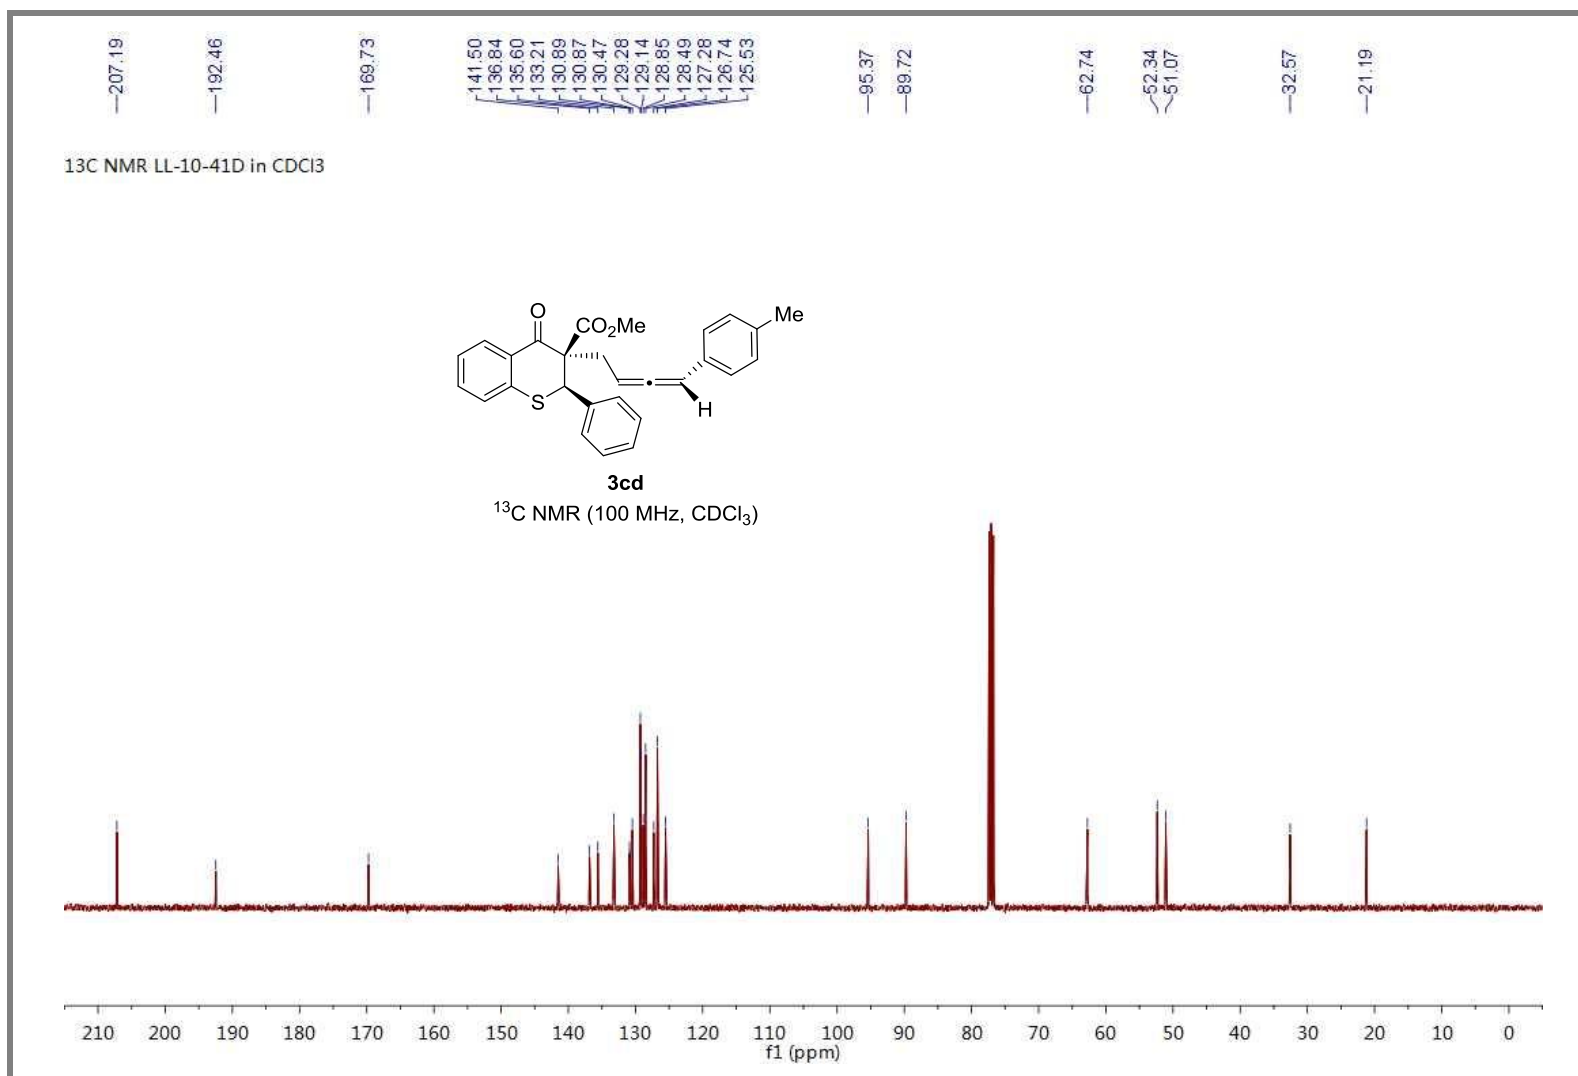

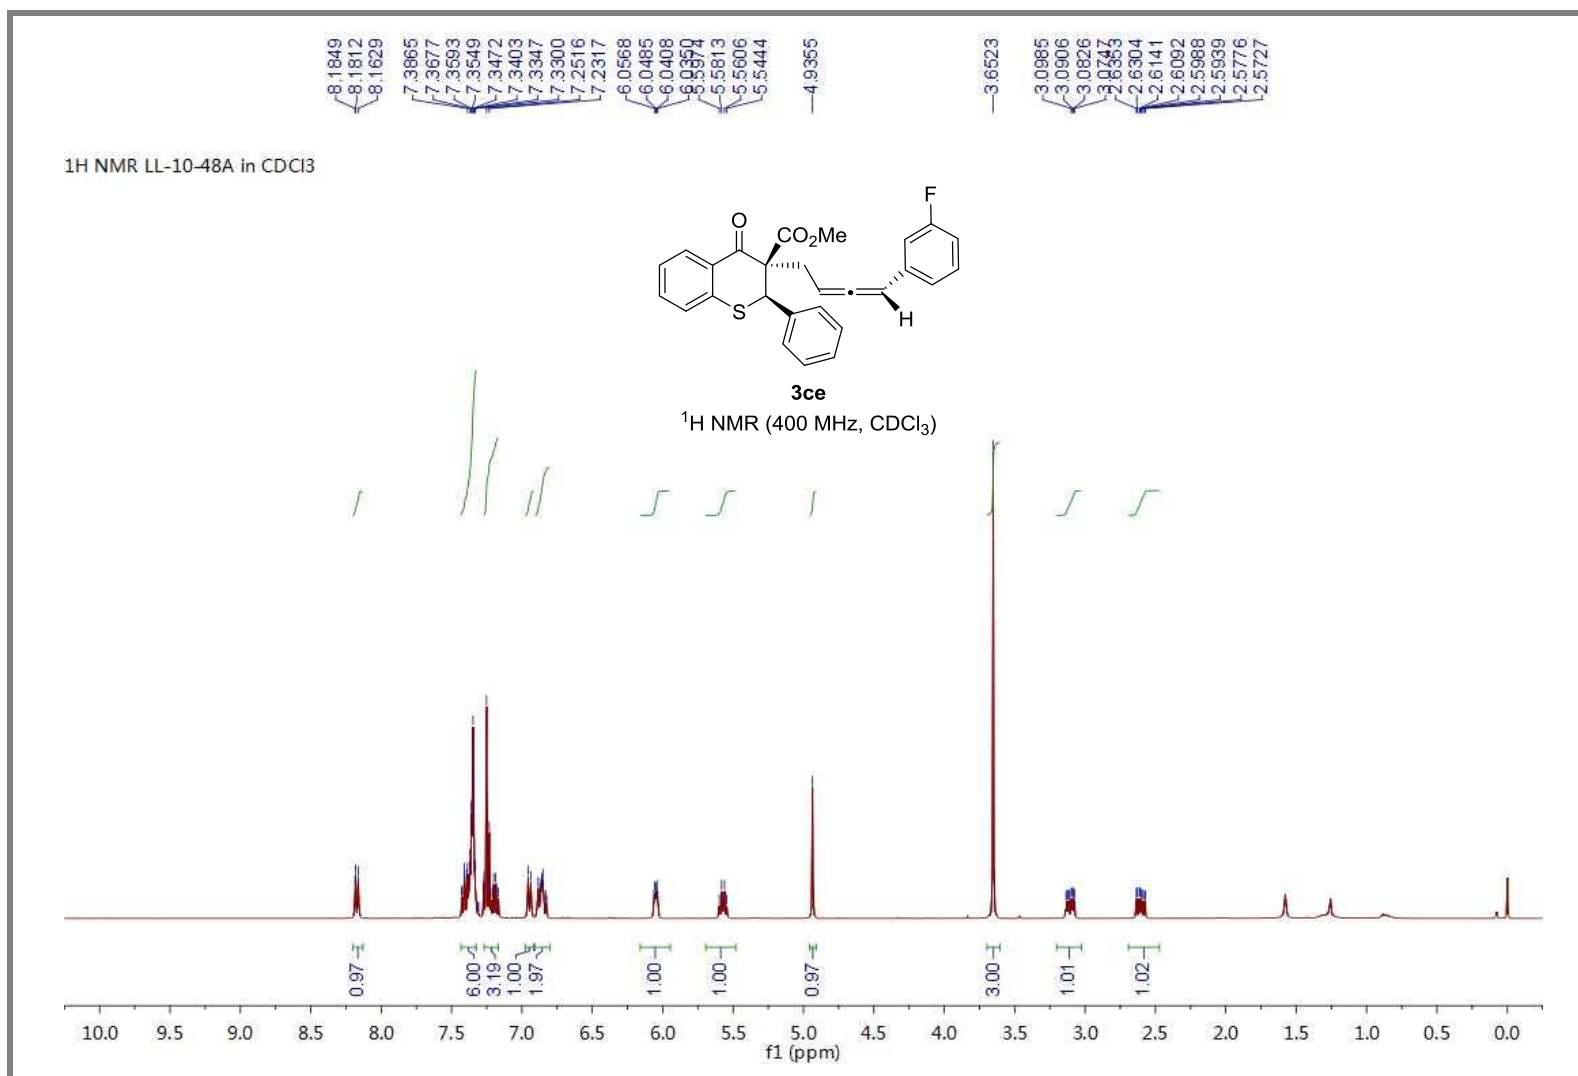

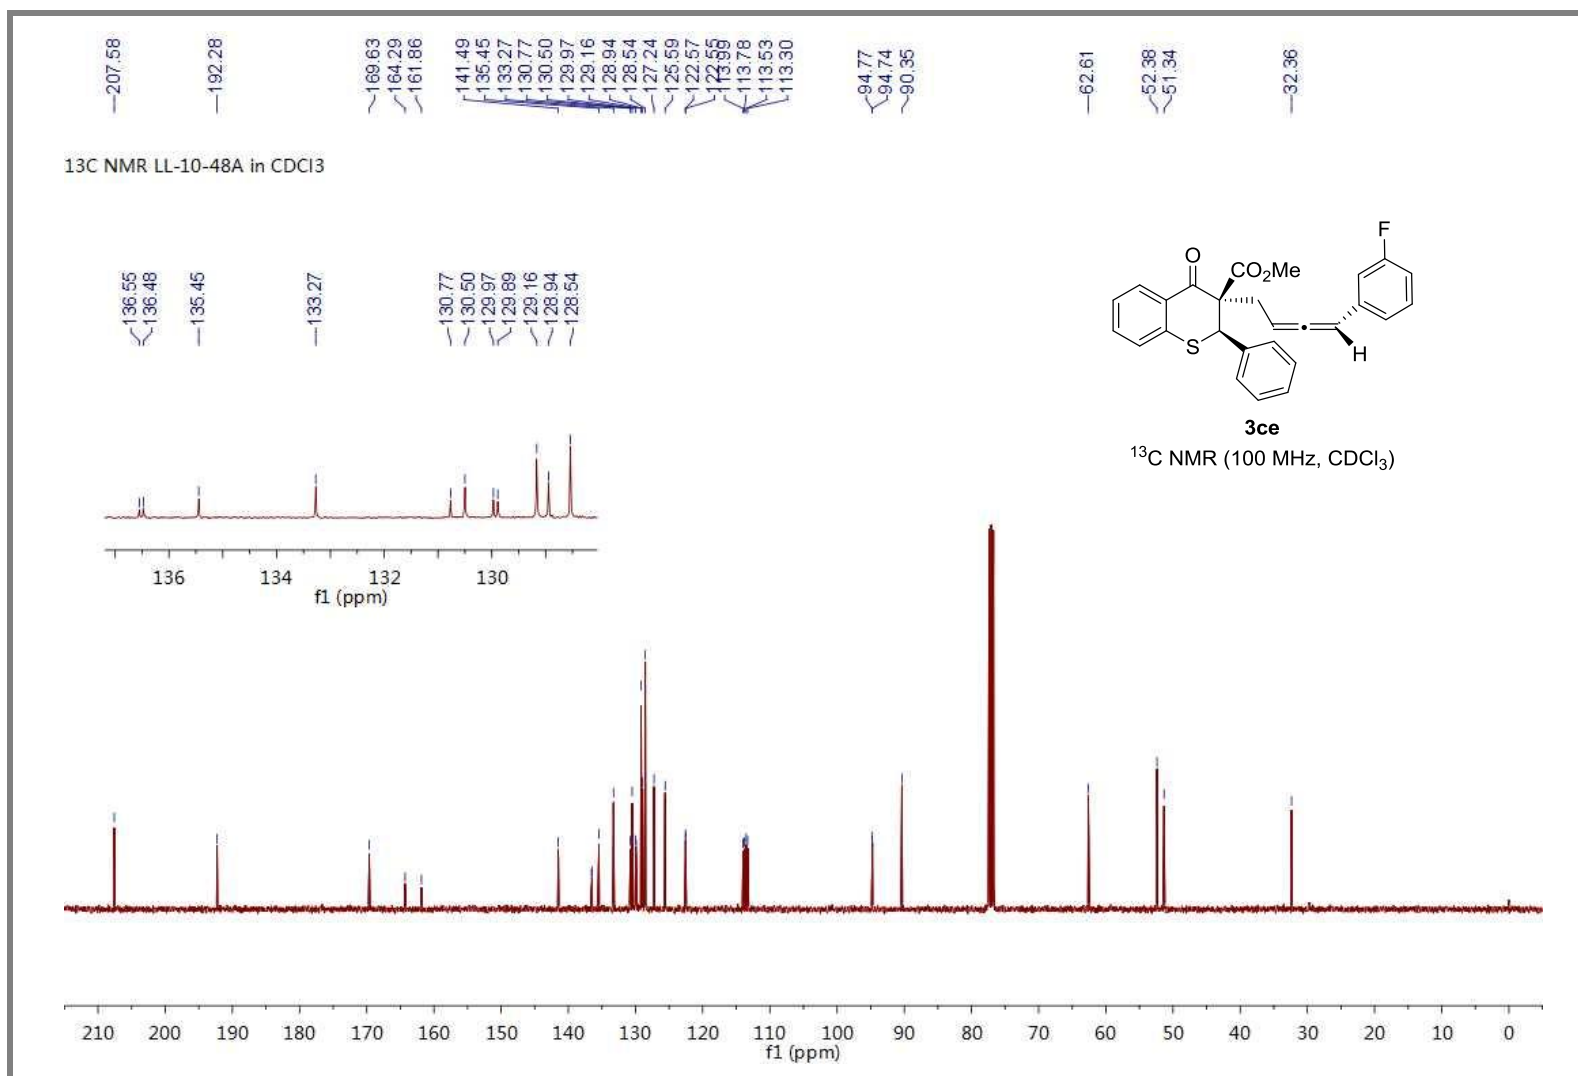

<sup>19</sup>F NMR LL-10-48A in CDCl<sub>3</sub>

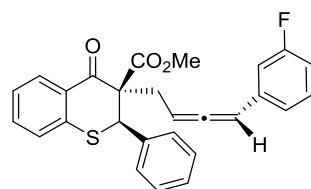

**3ce**

<sup>19</sup>F NMR (376 MHz, CDCl<sub>3</sub>)

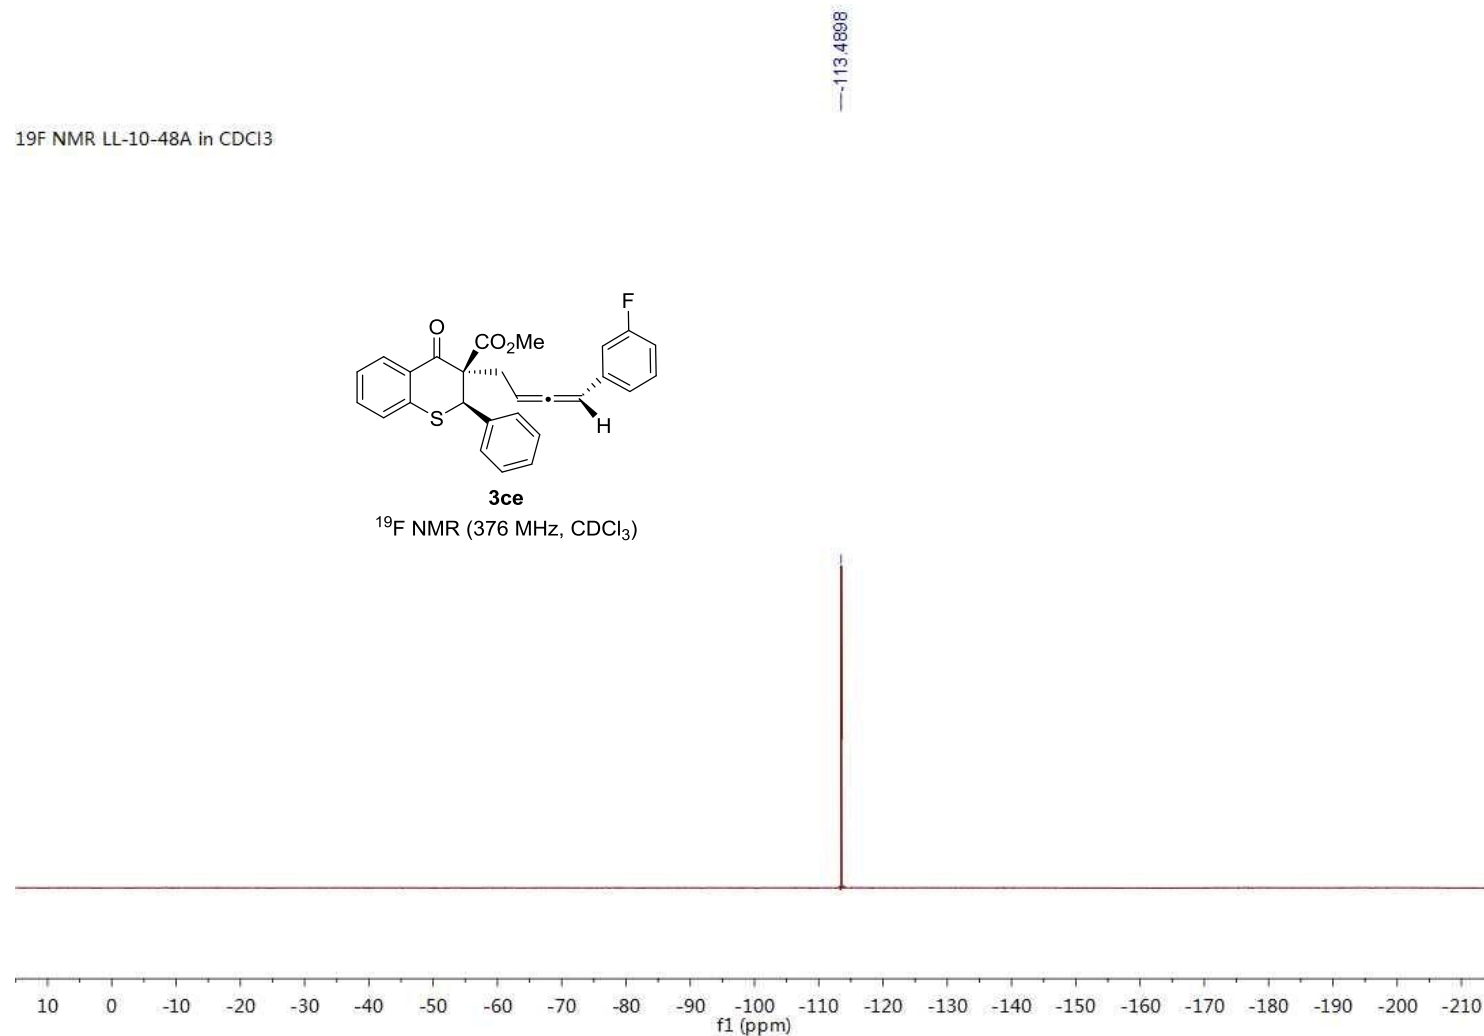

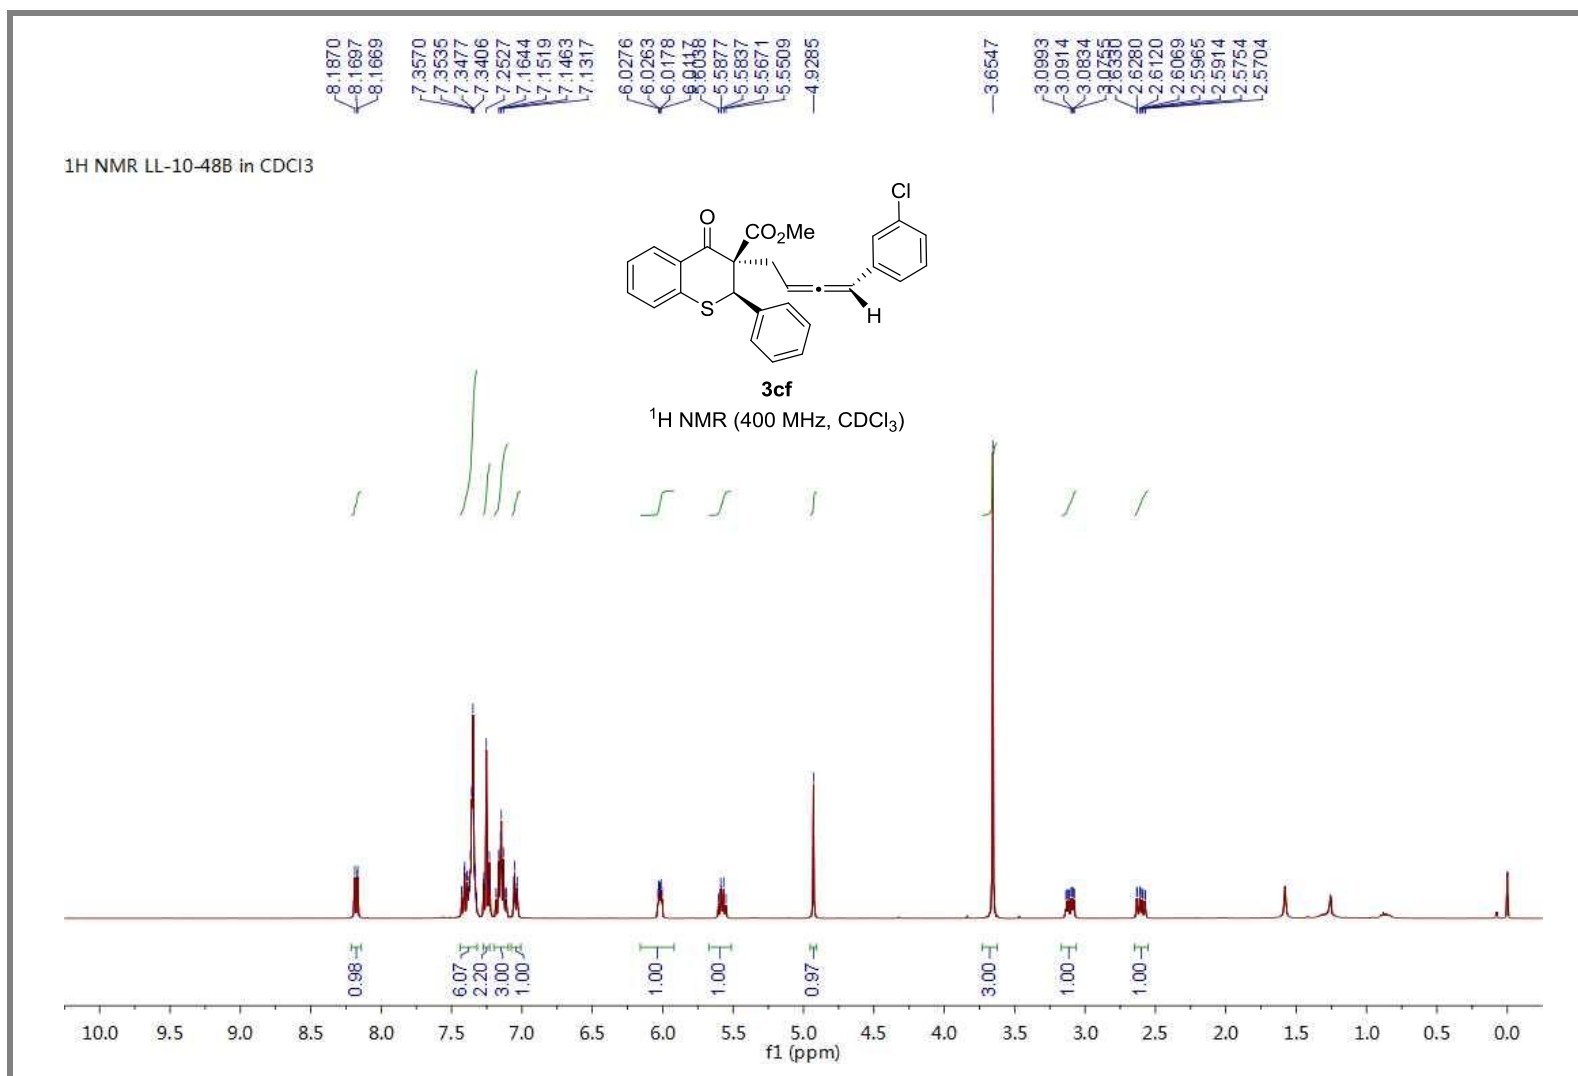

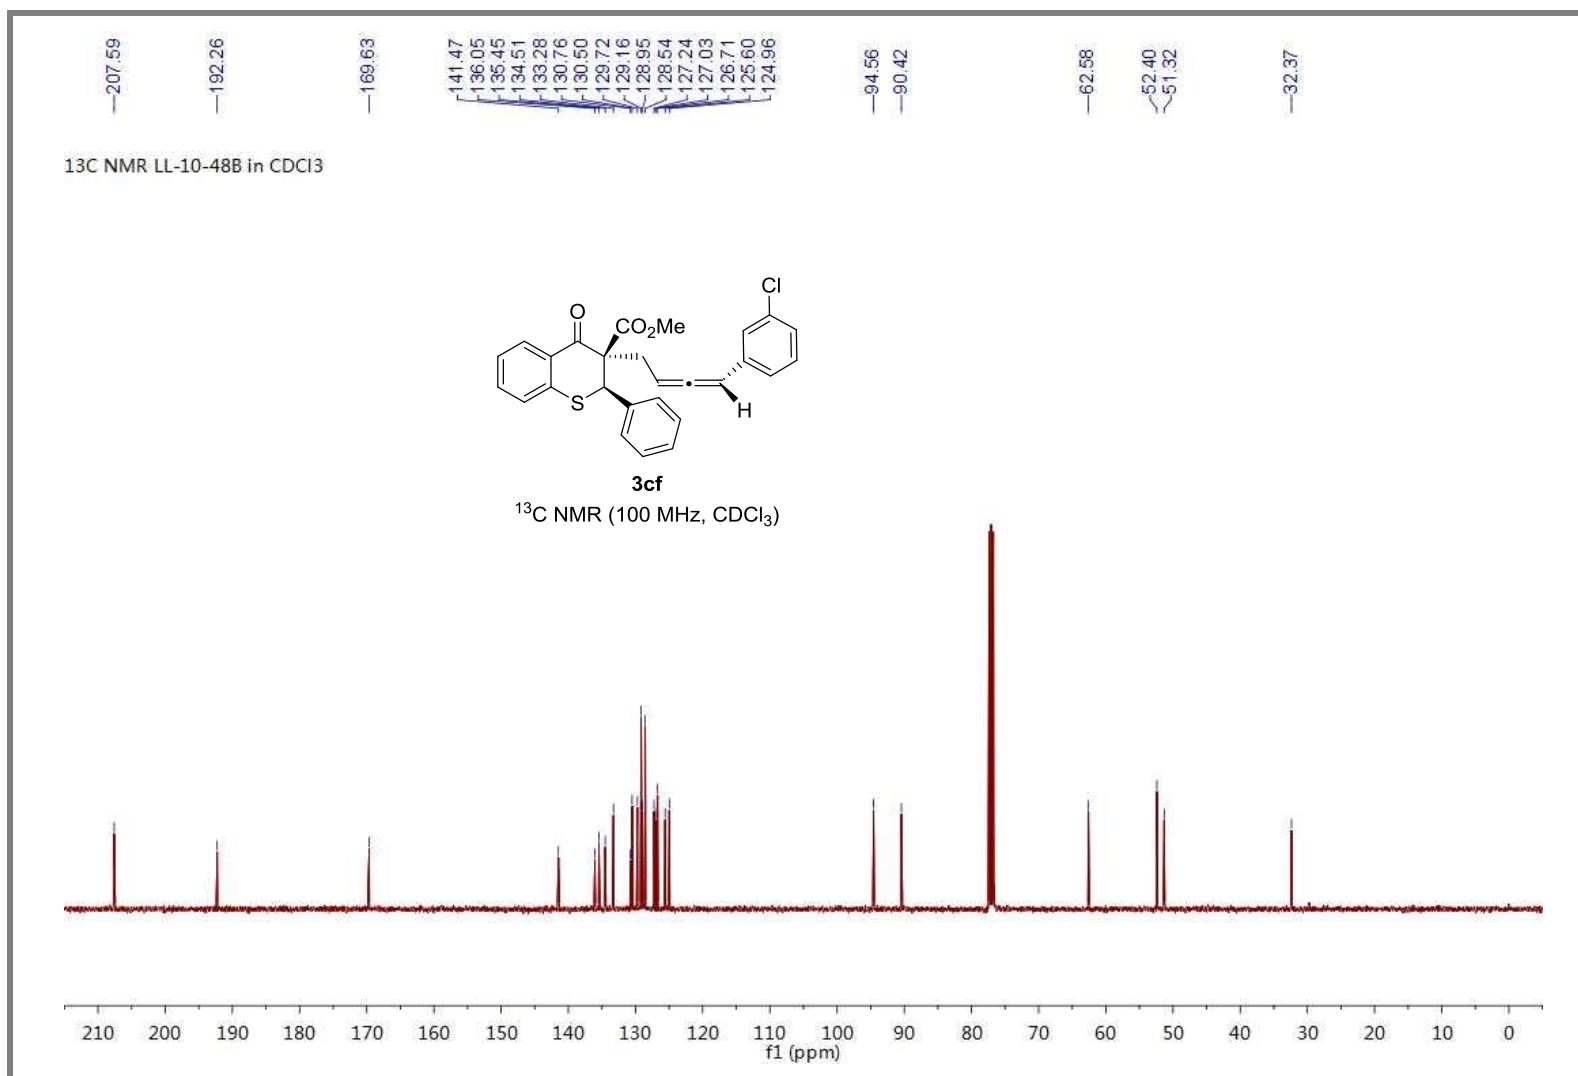



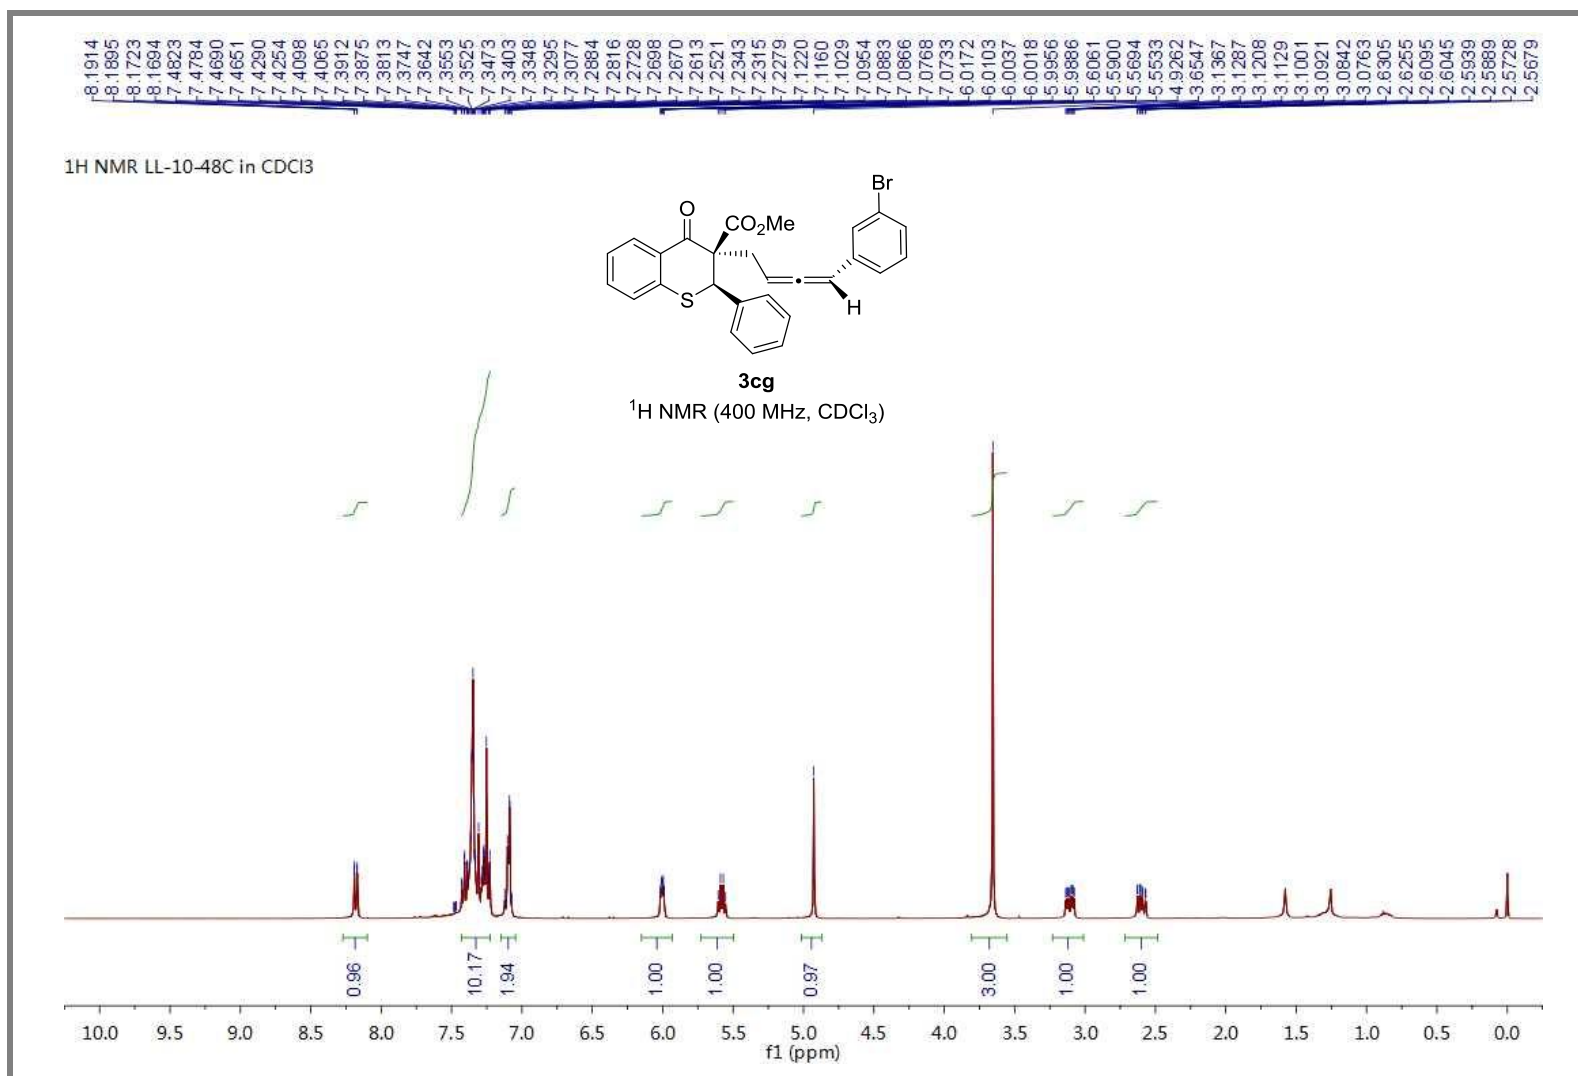

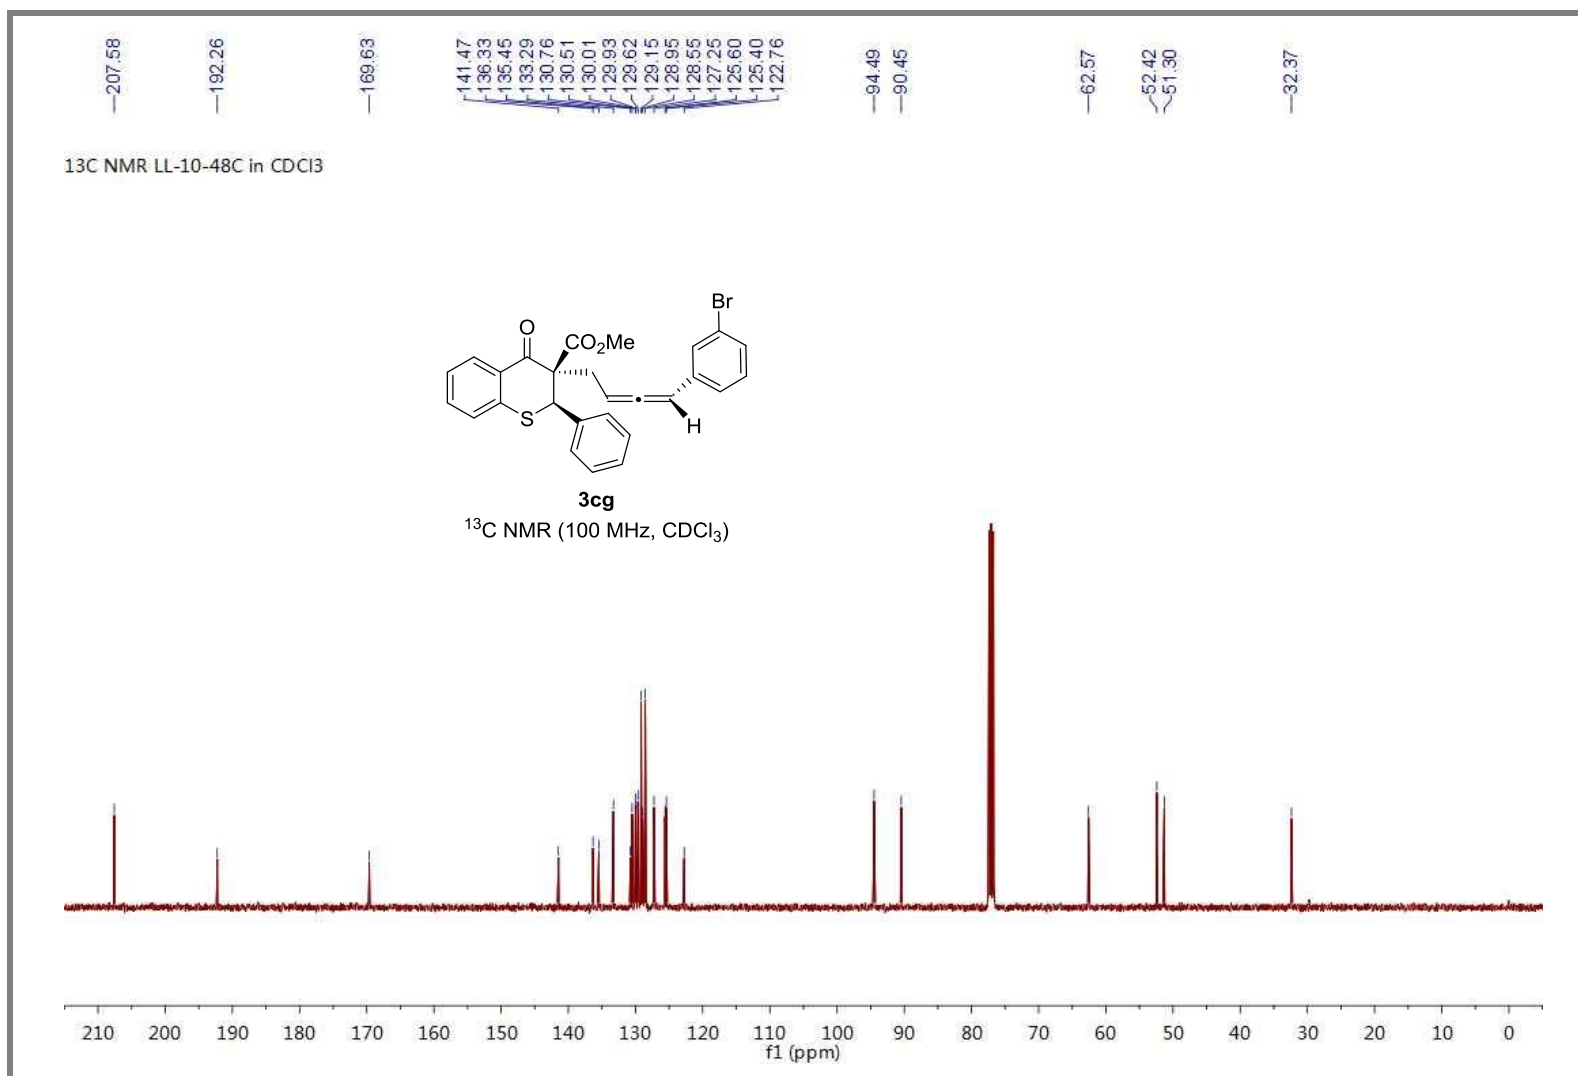

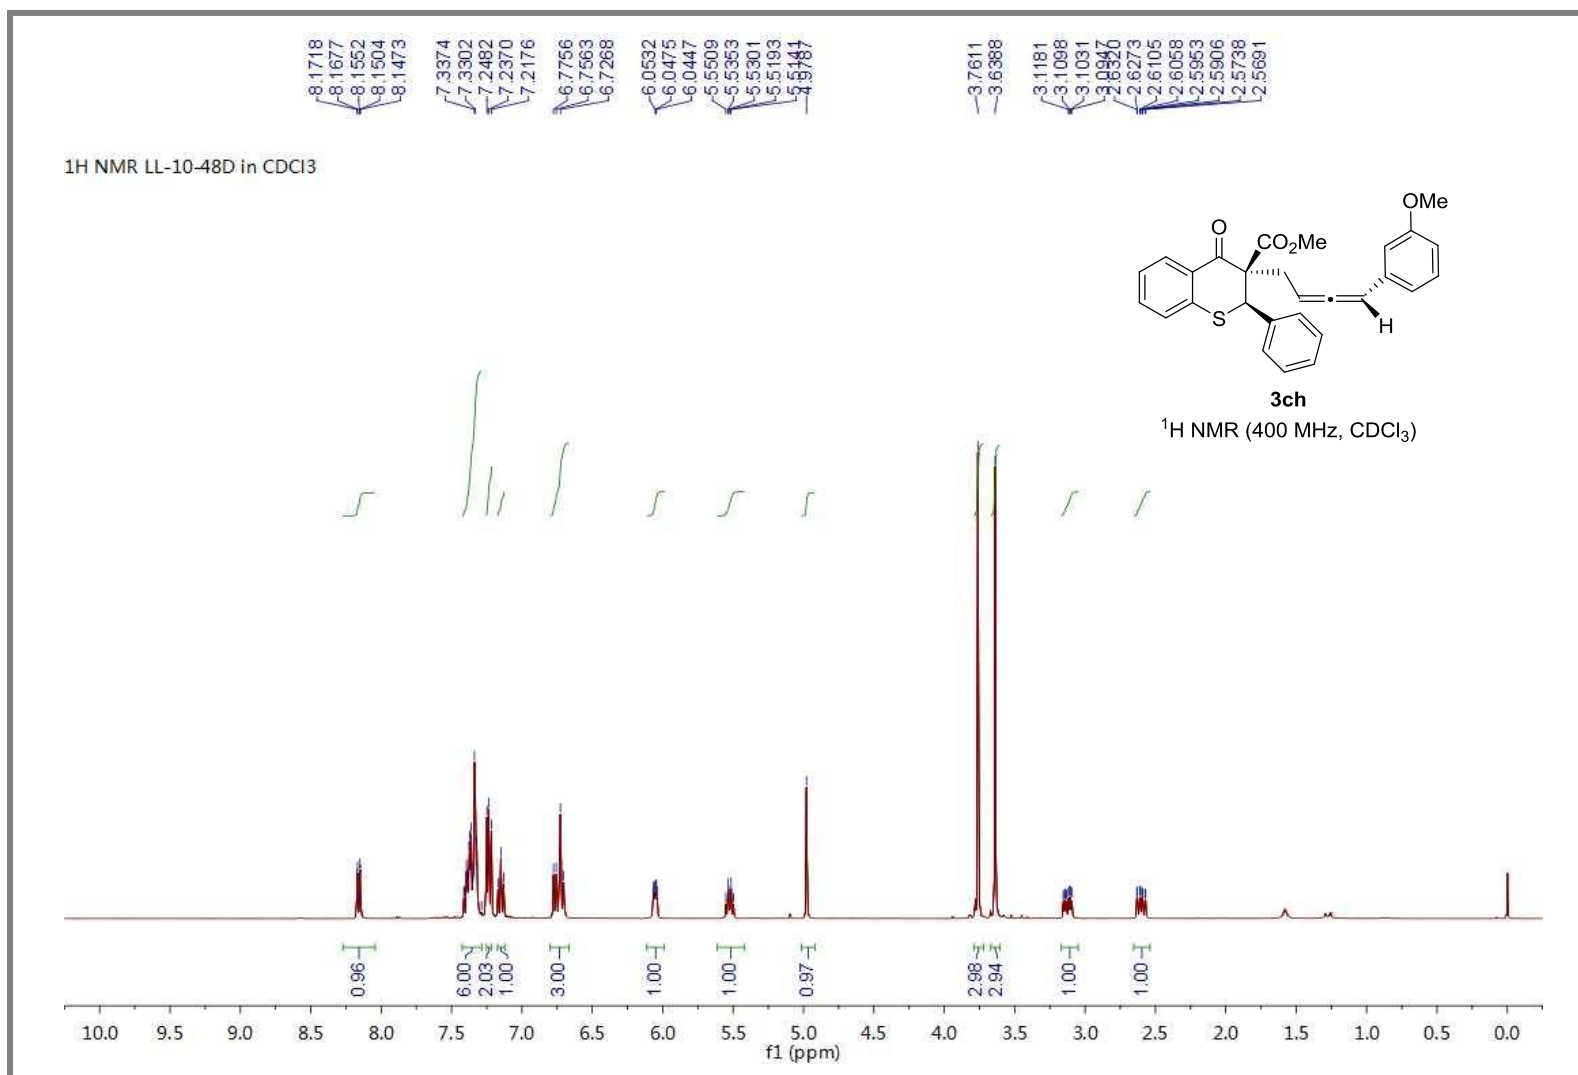

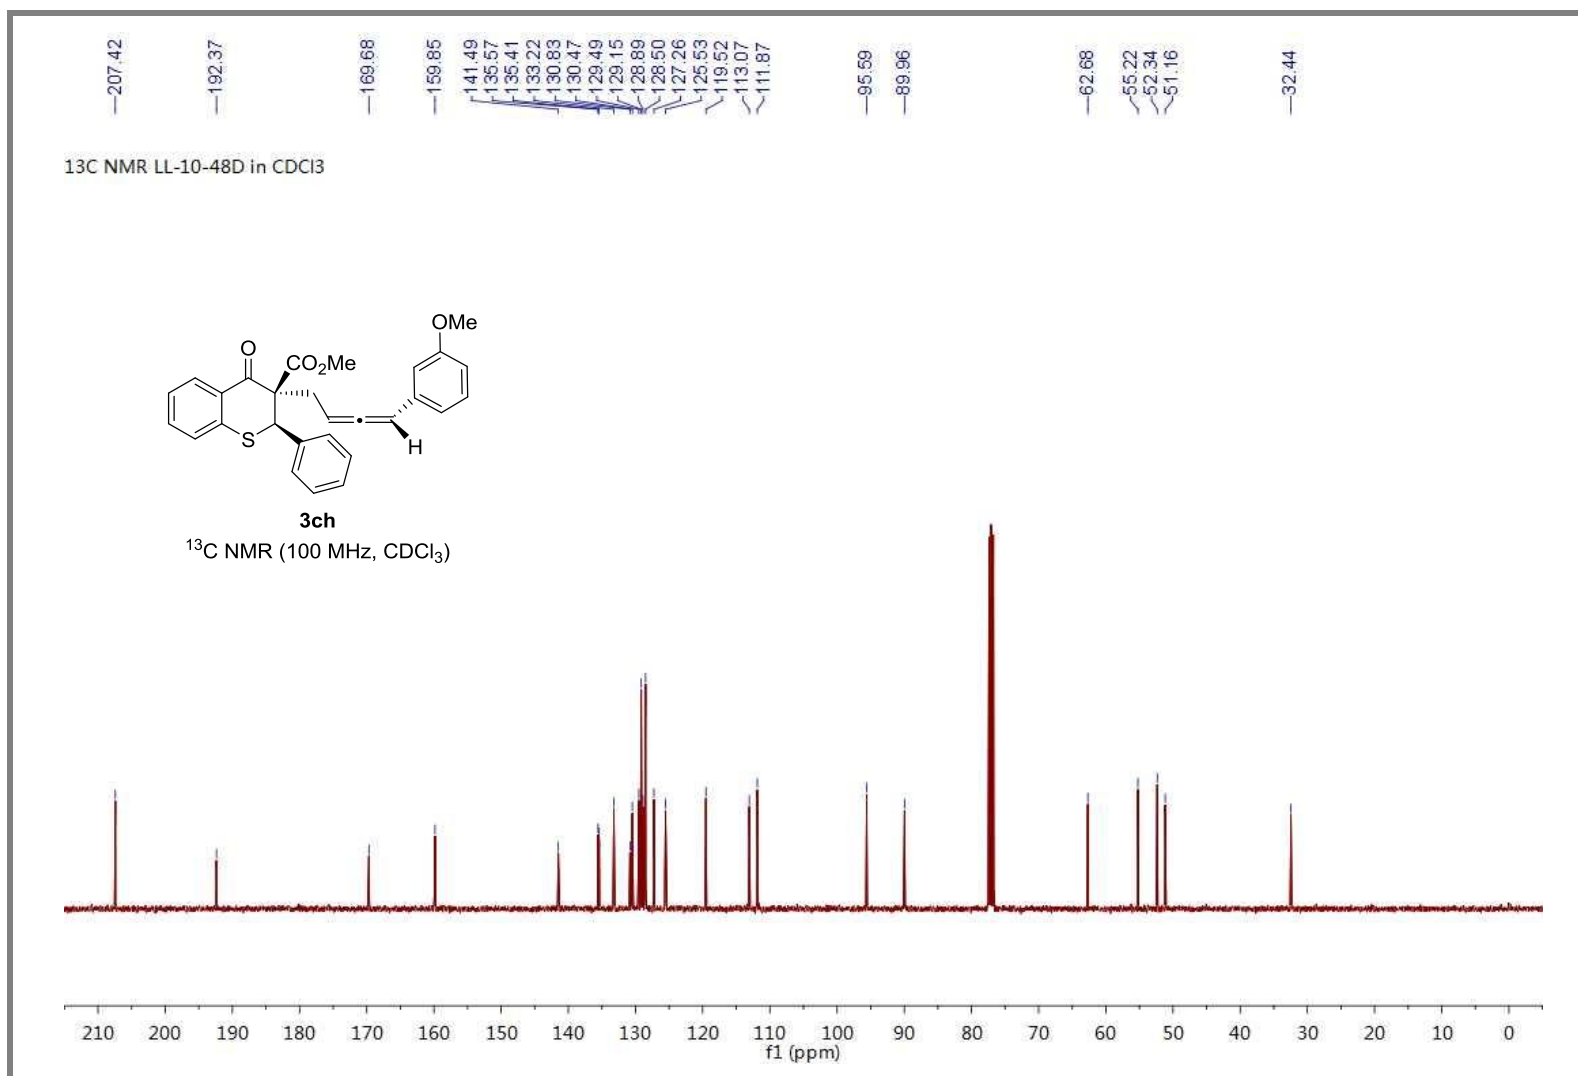

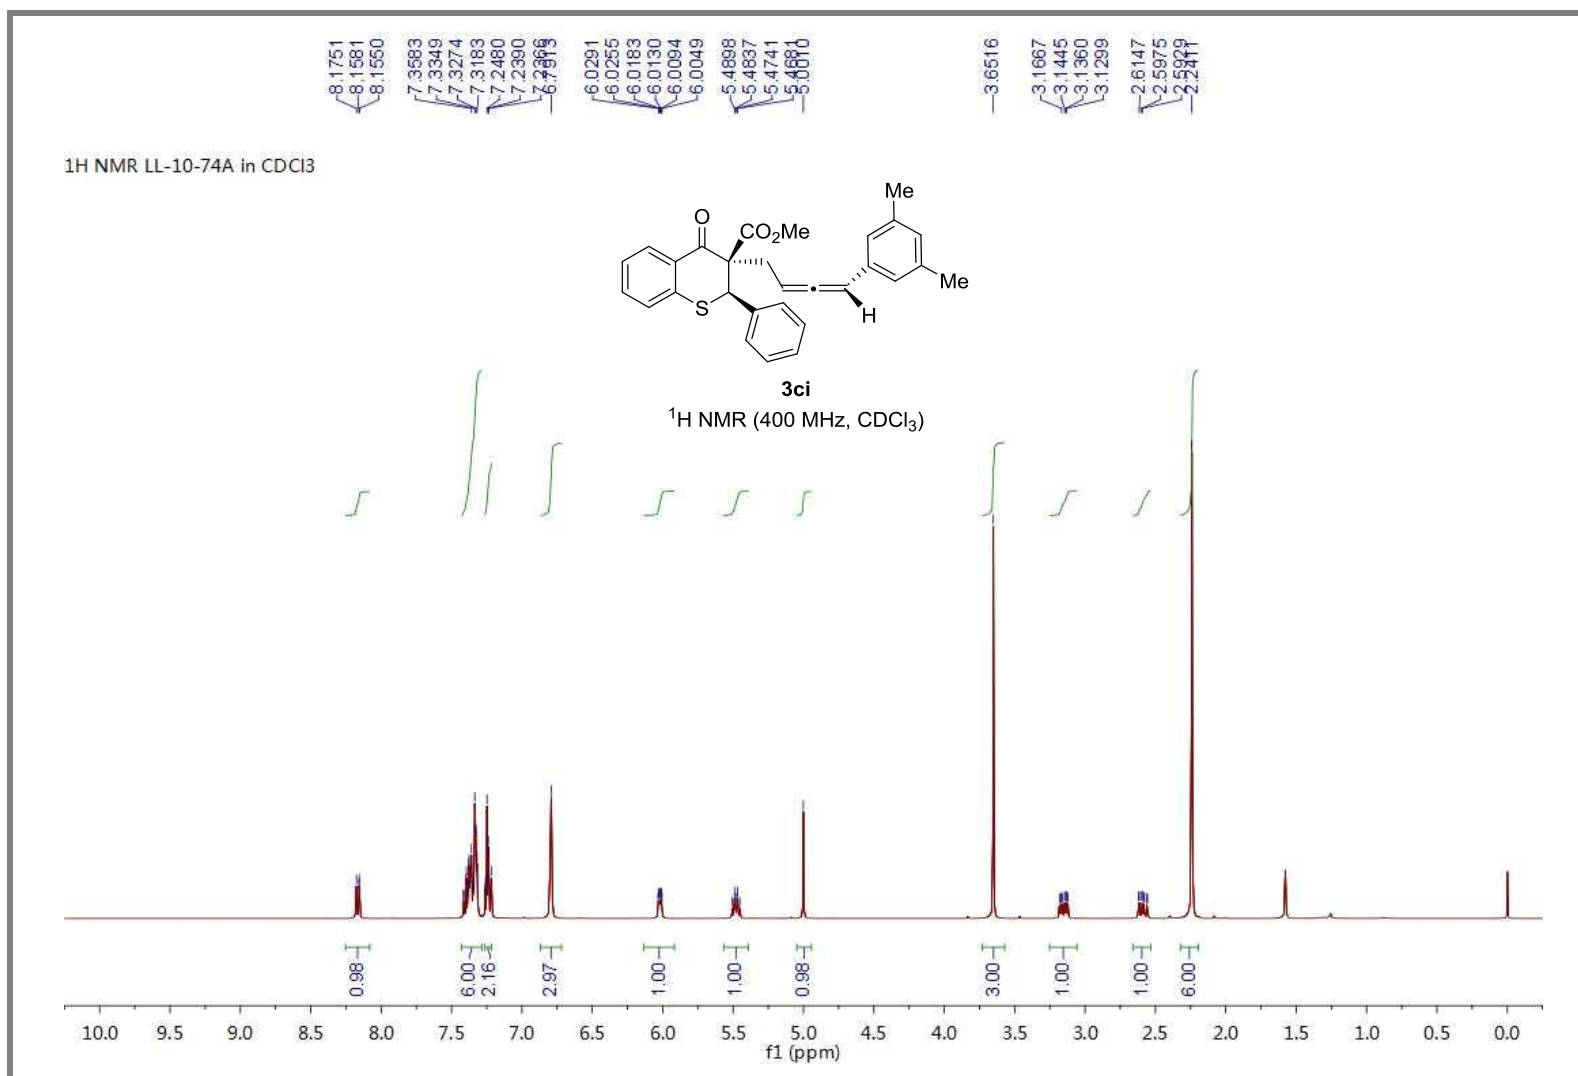

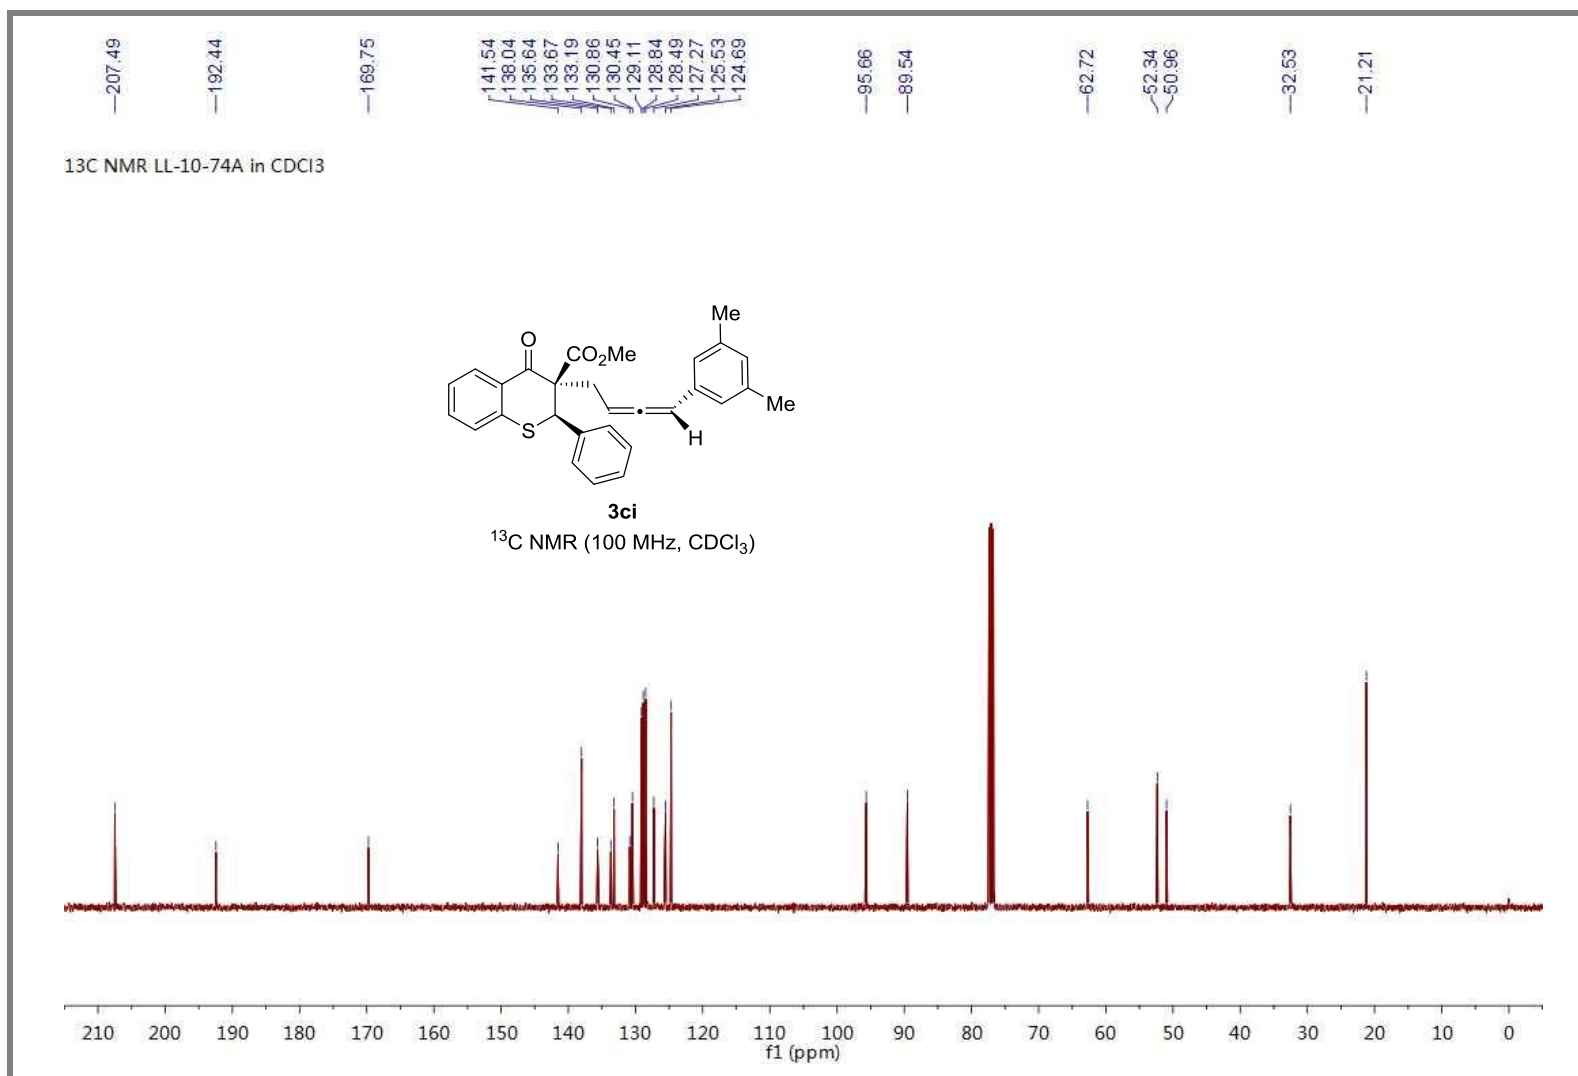

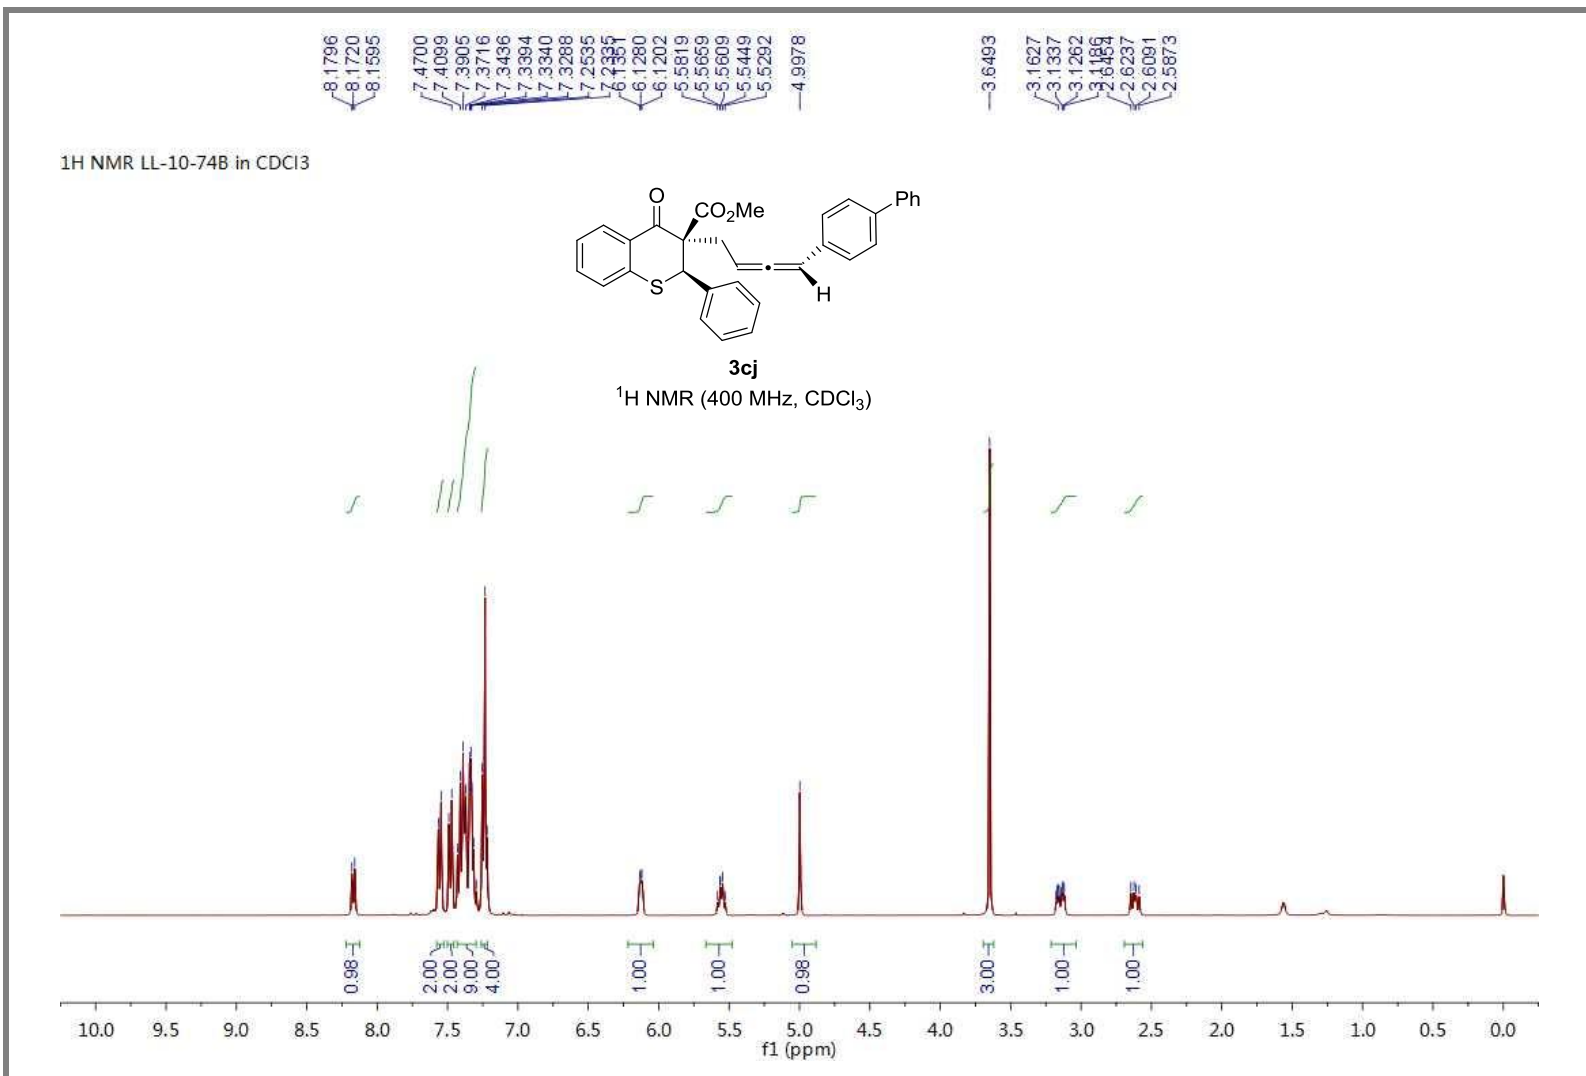

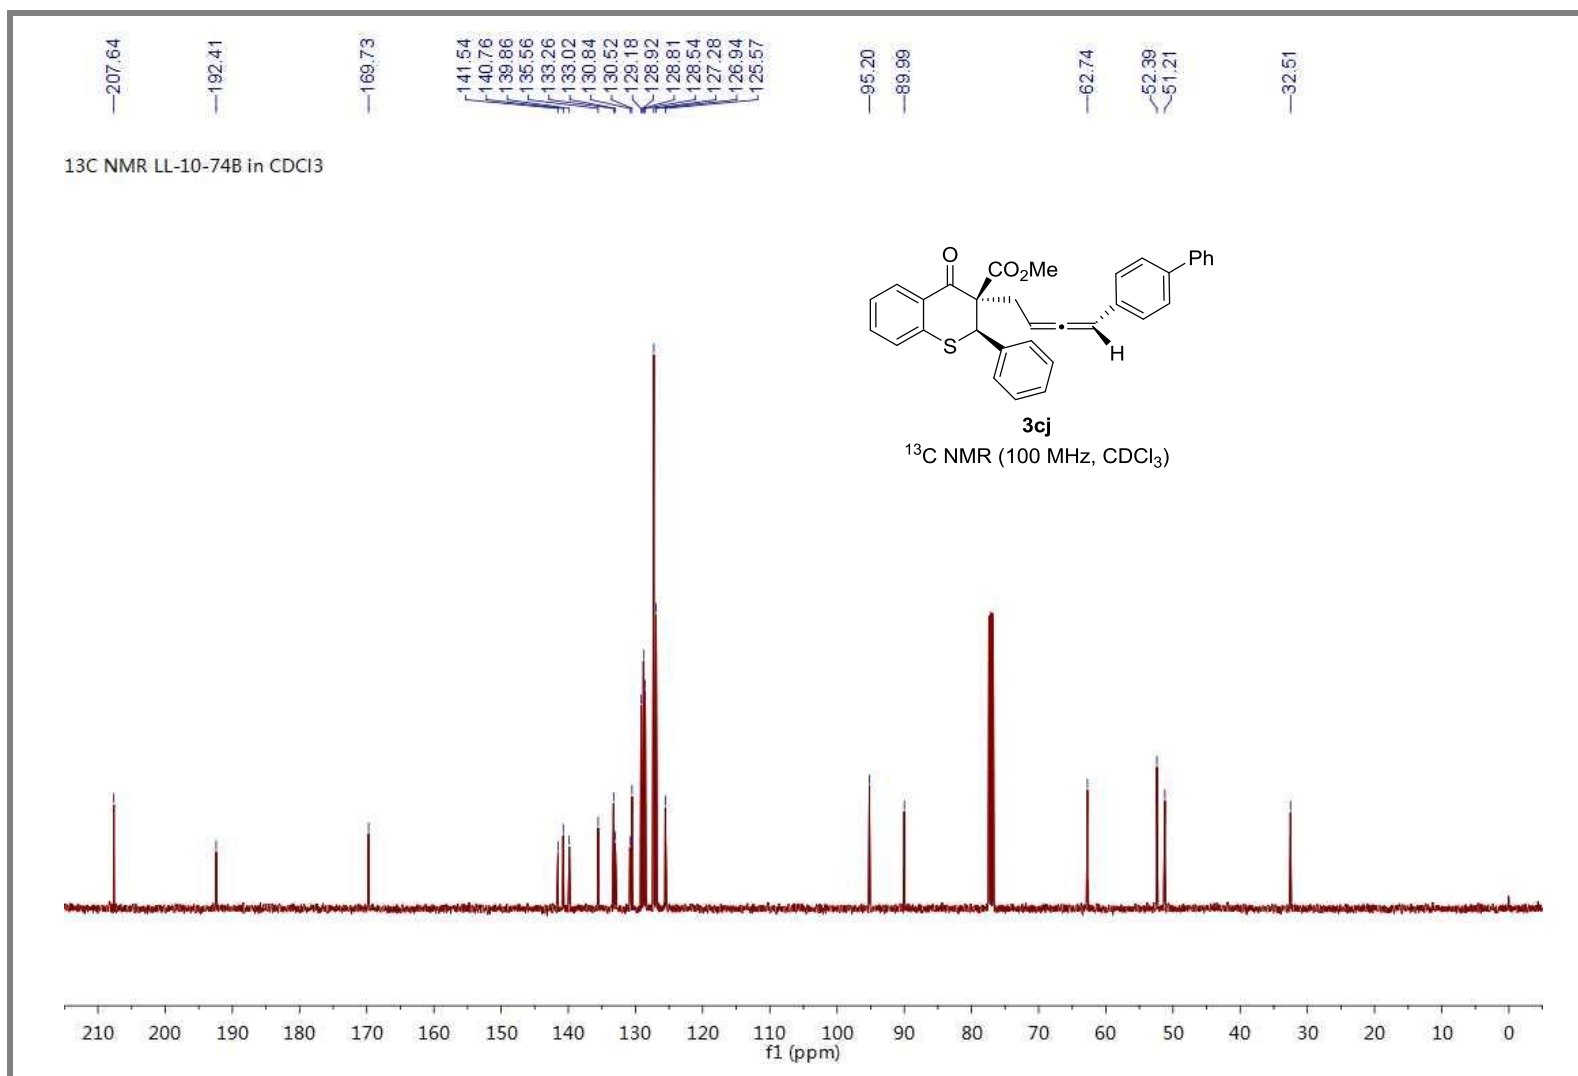



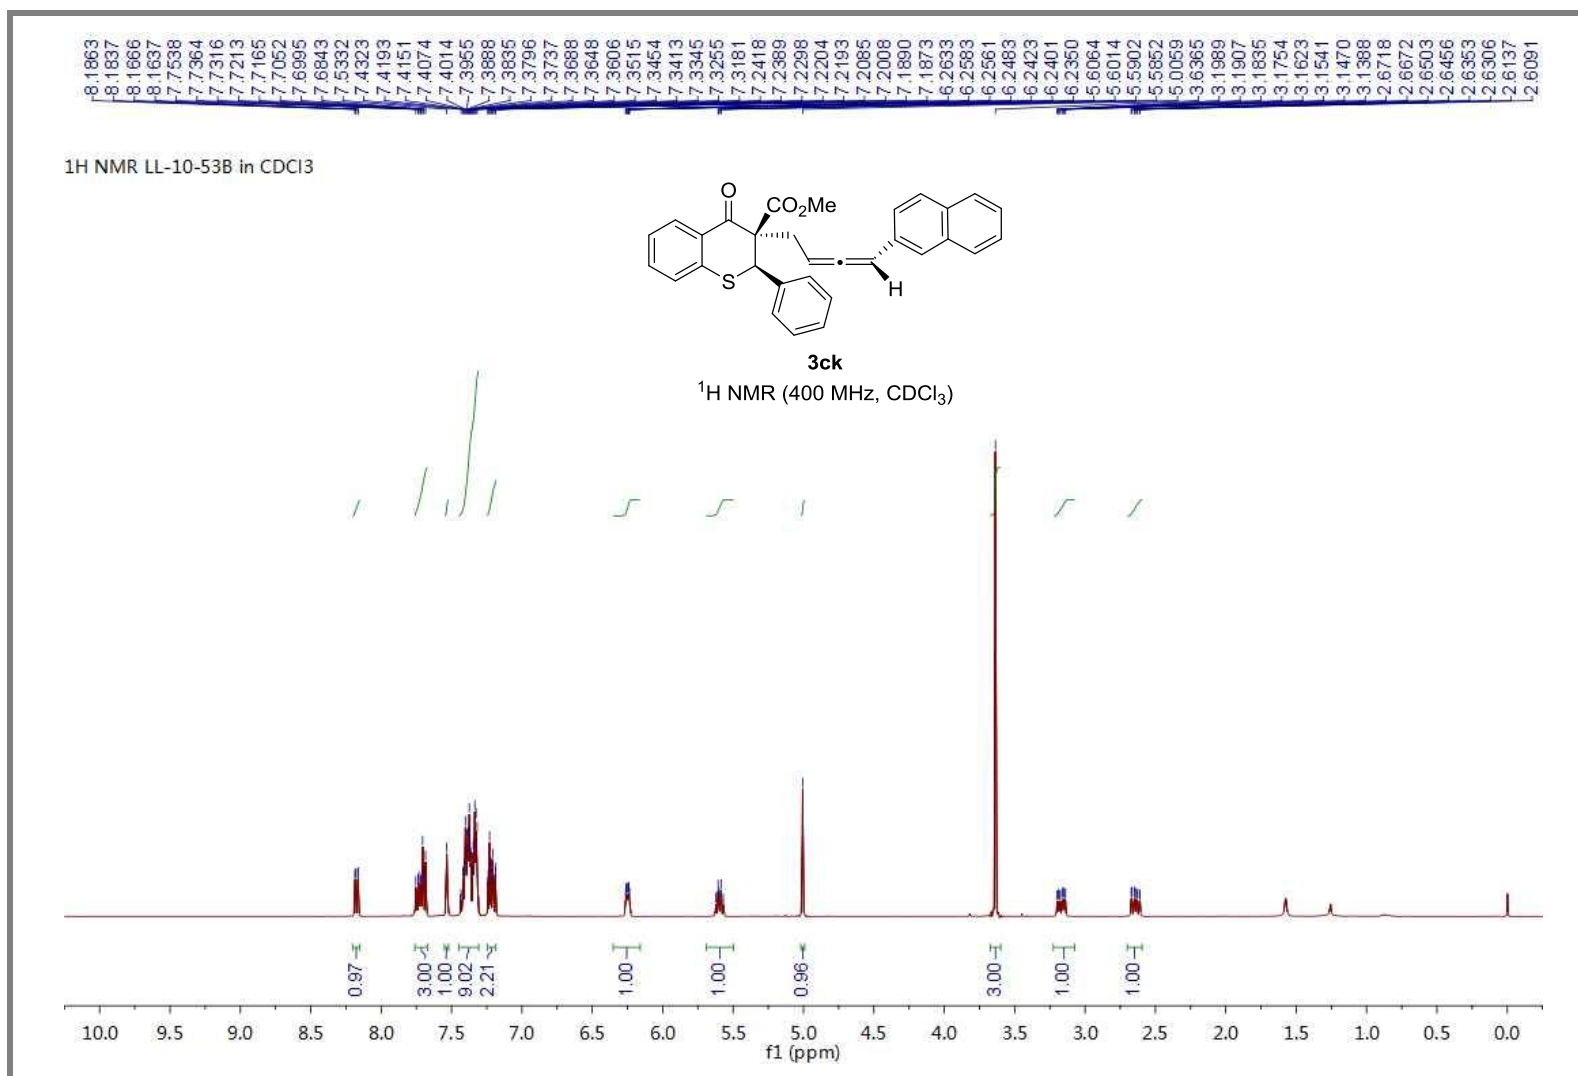

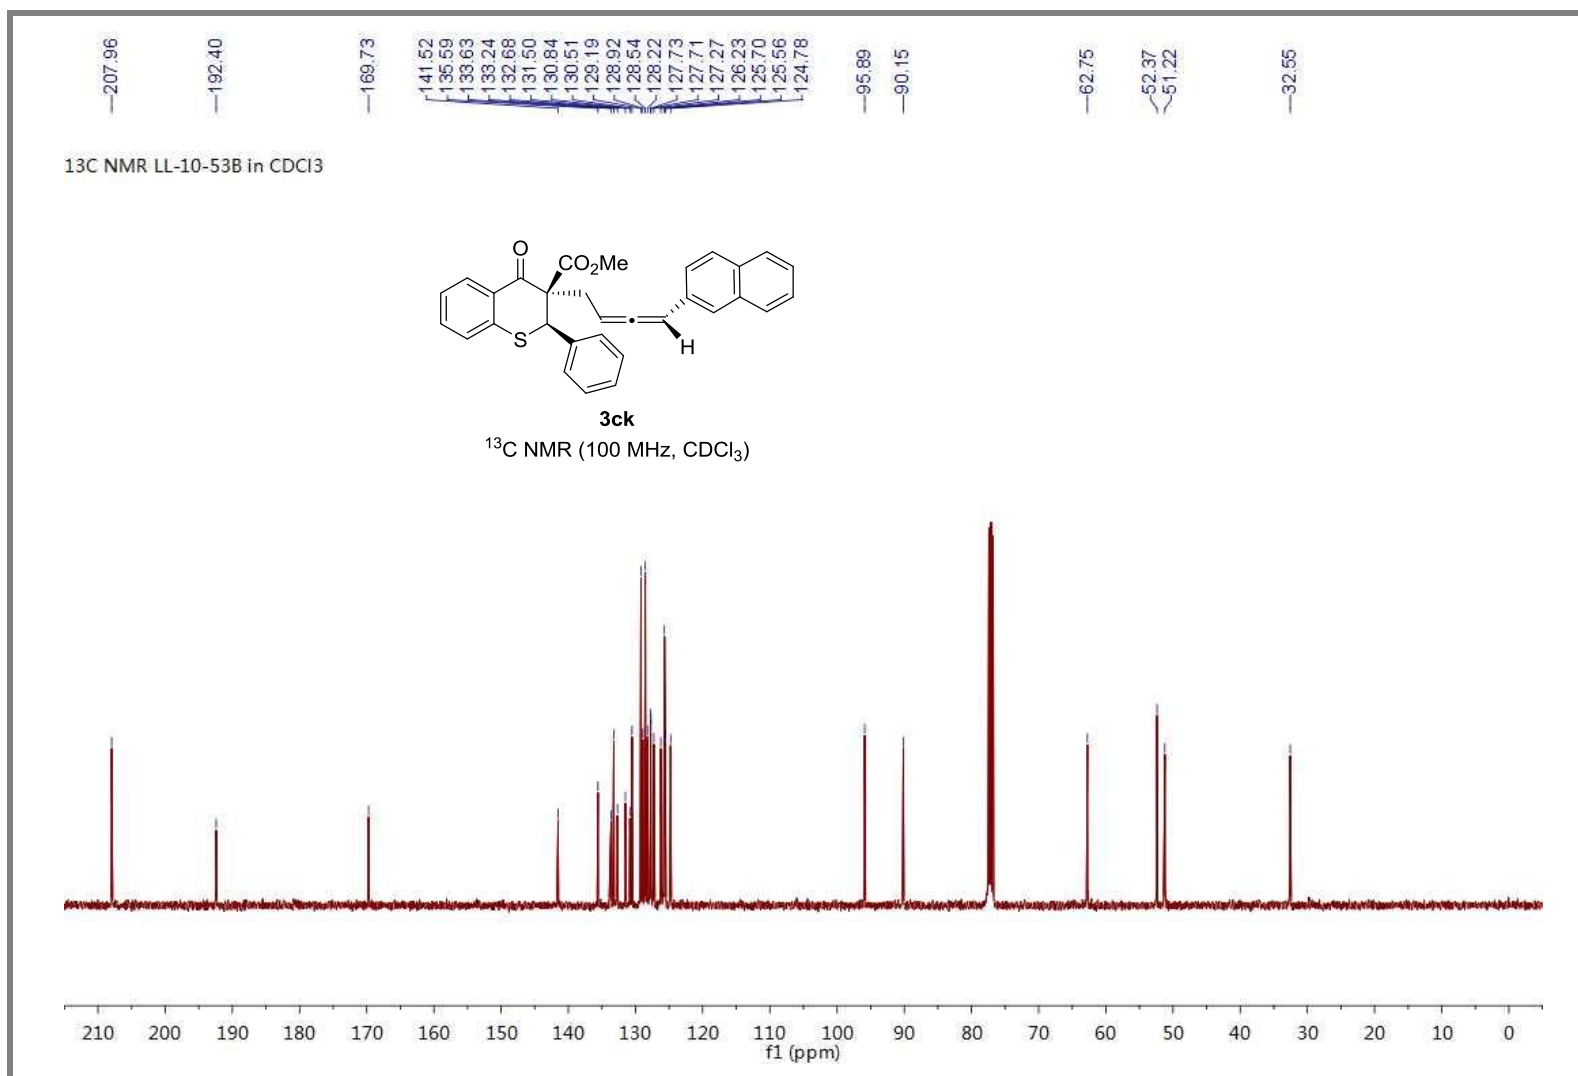

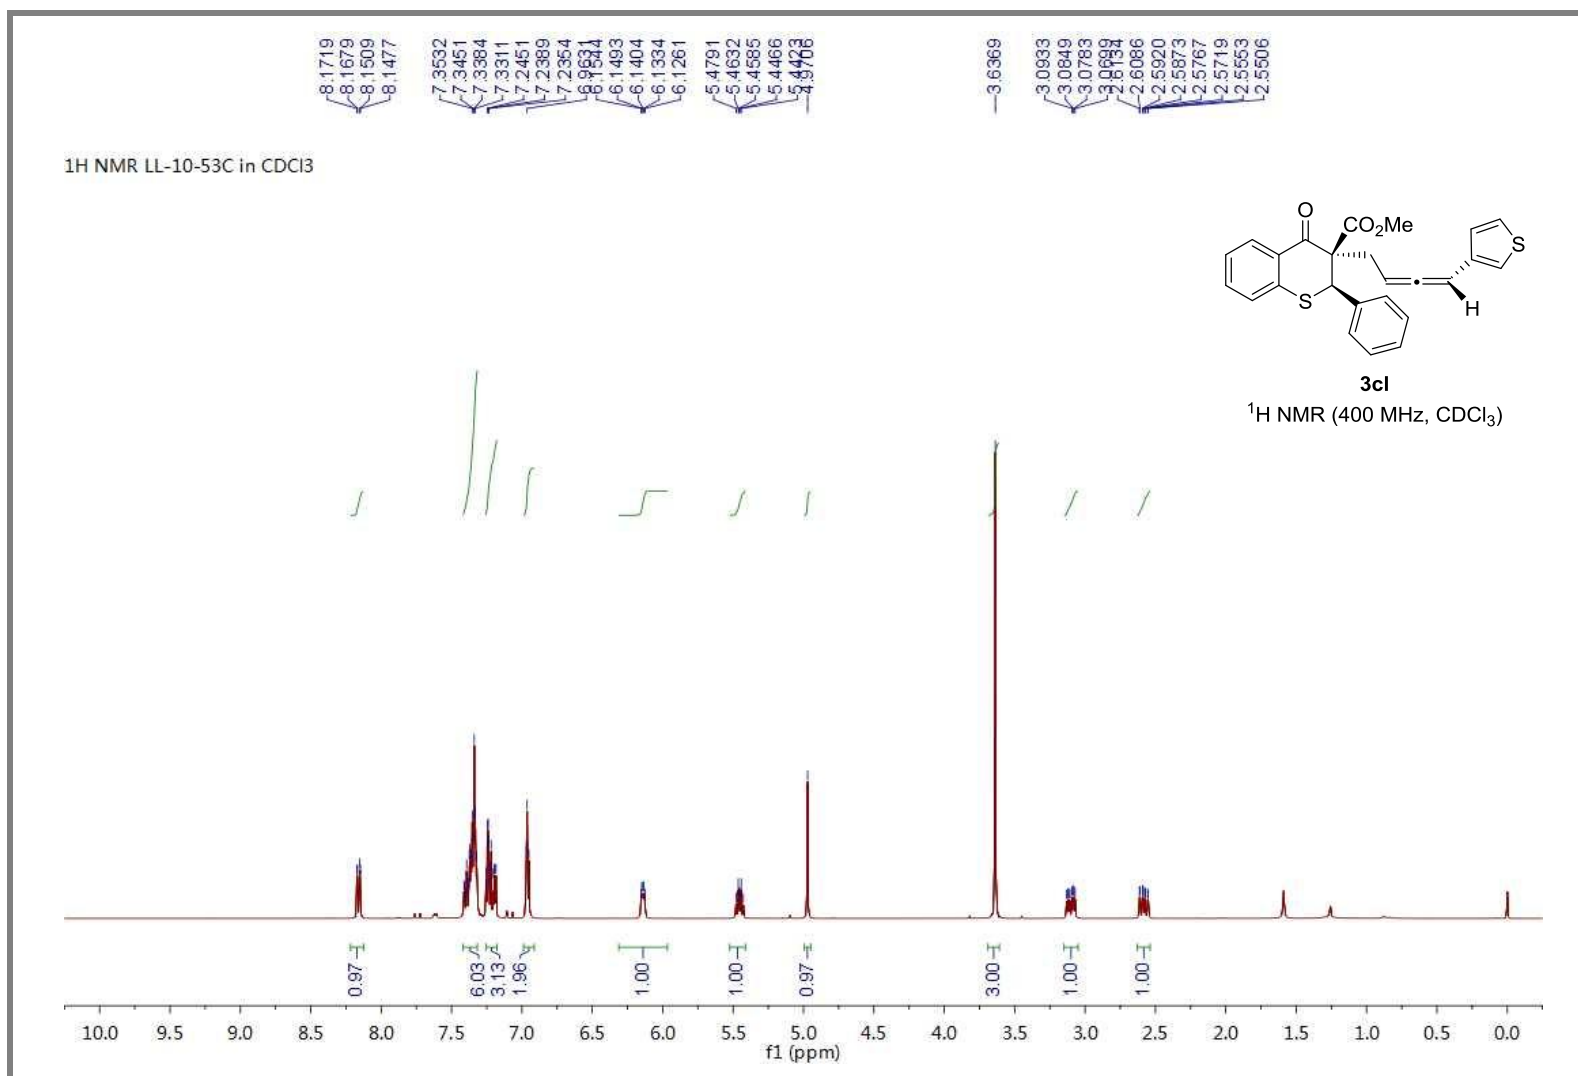

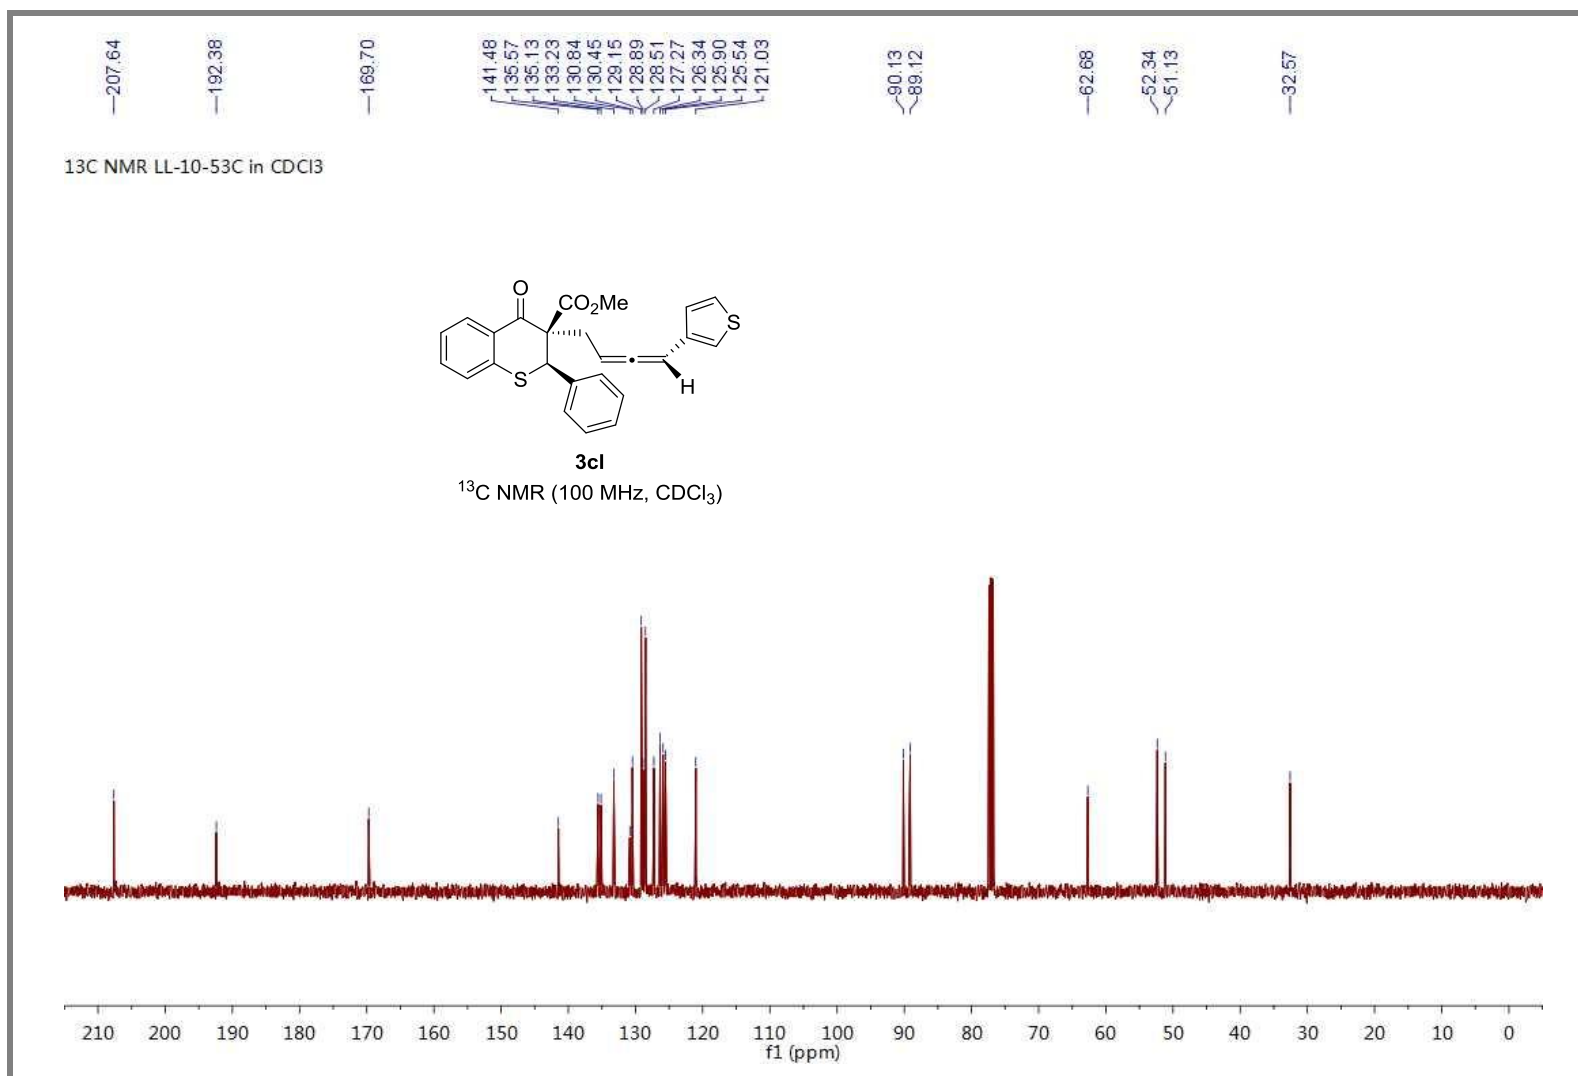

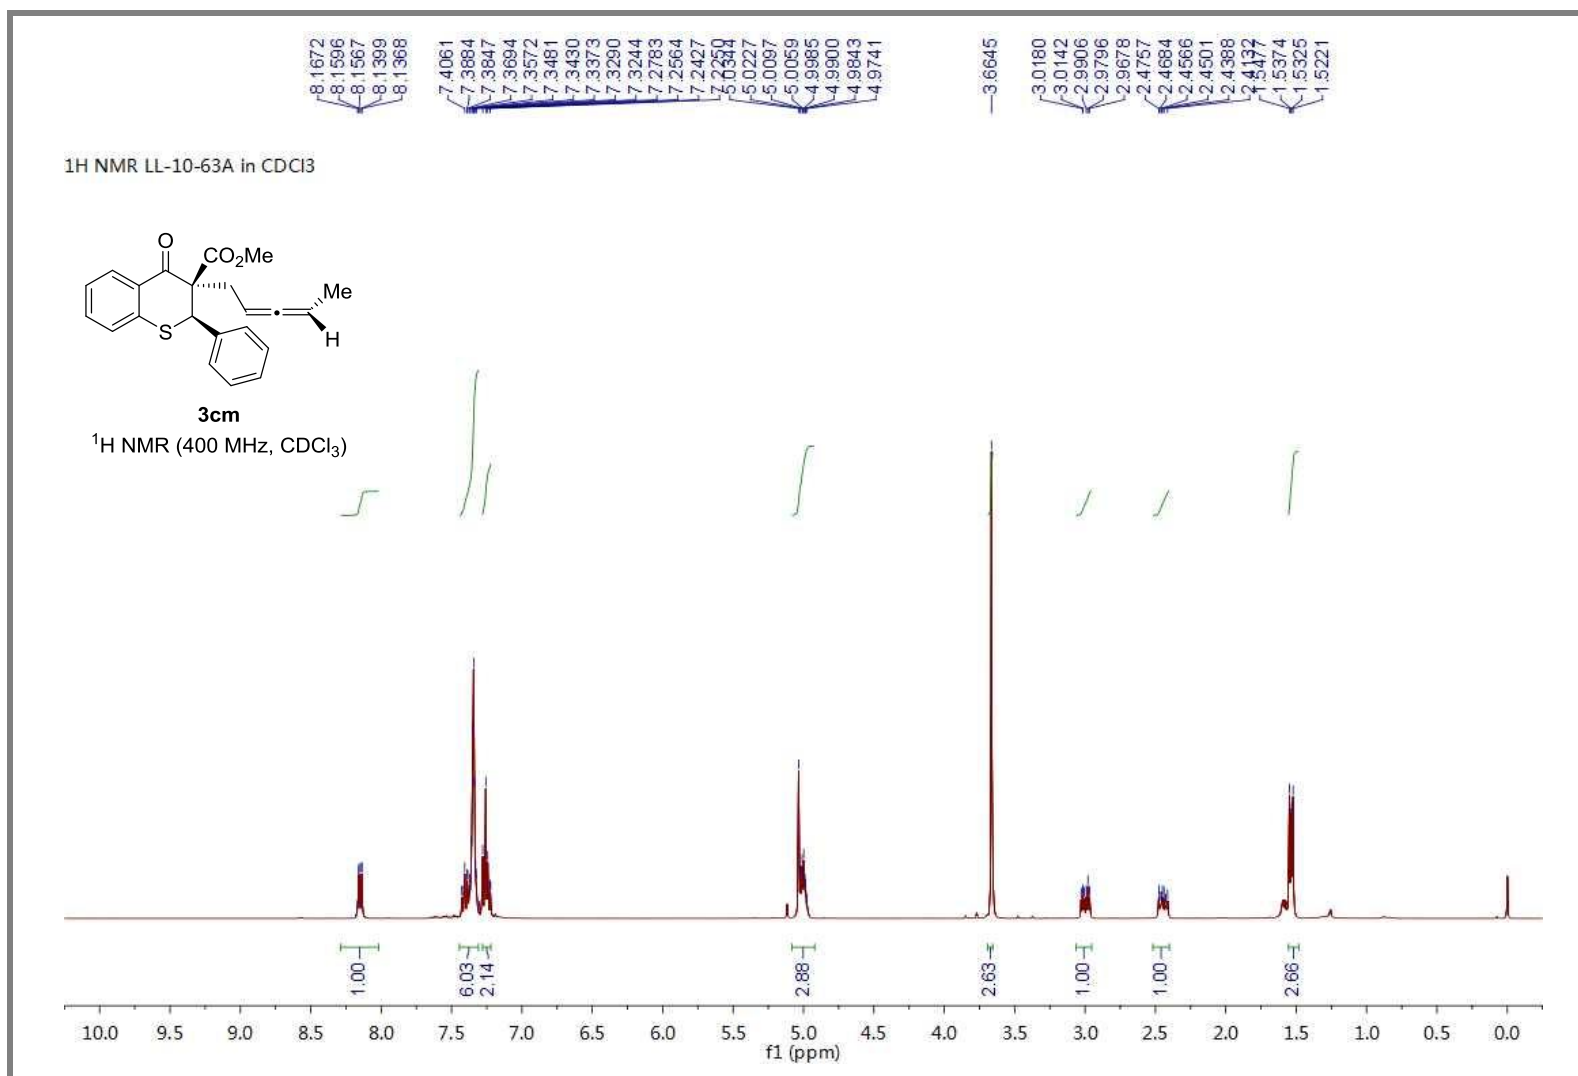

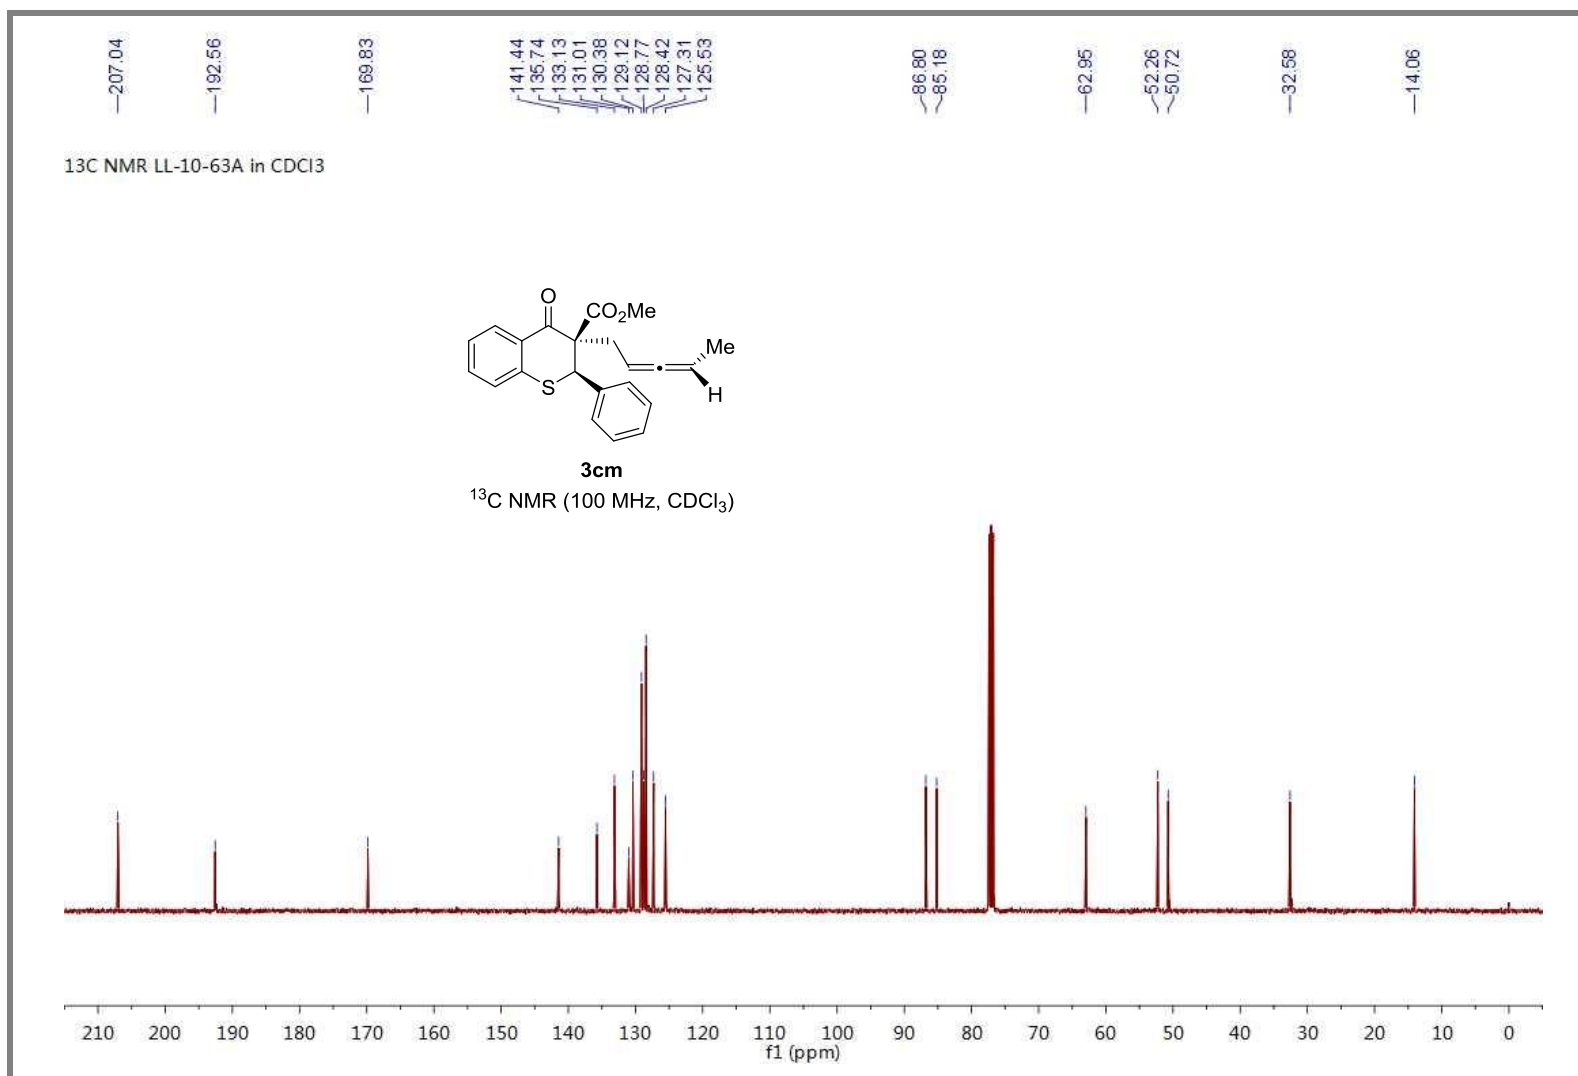

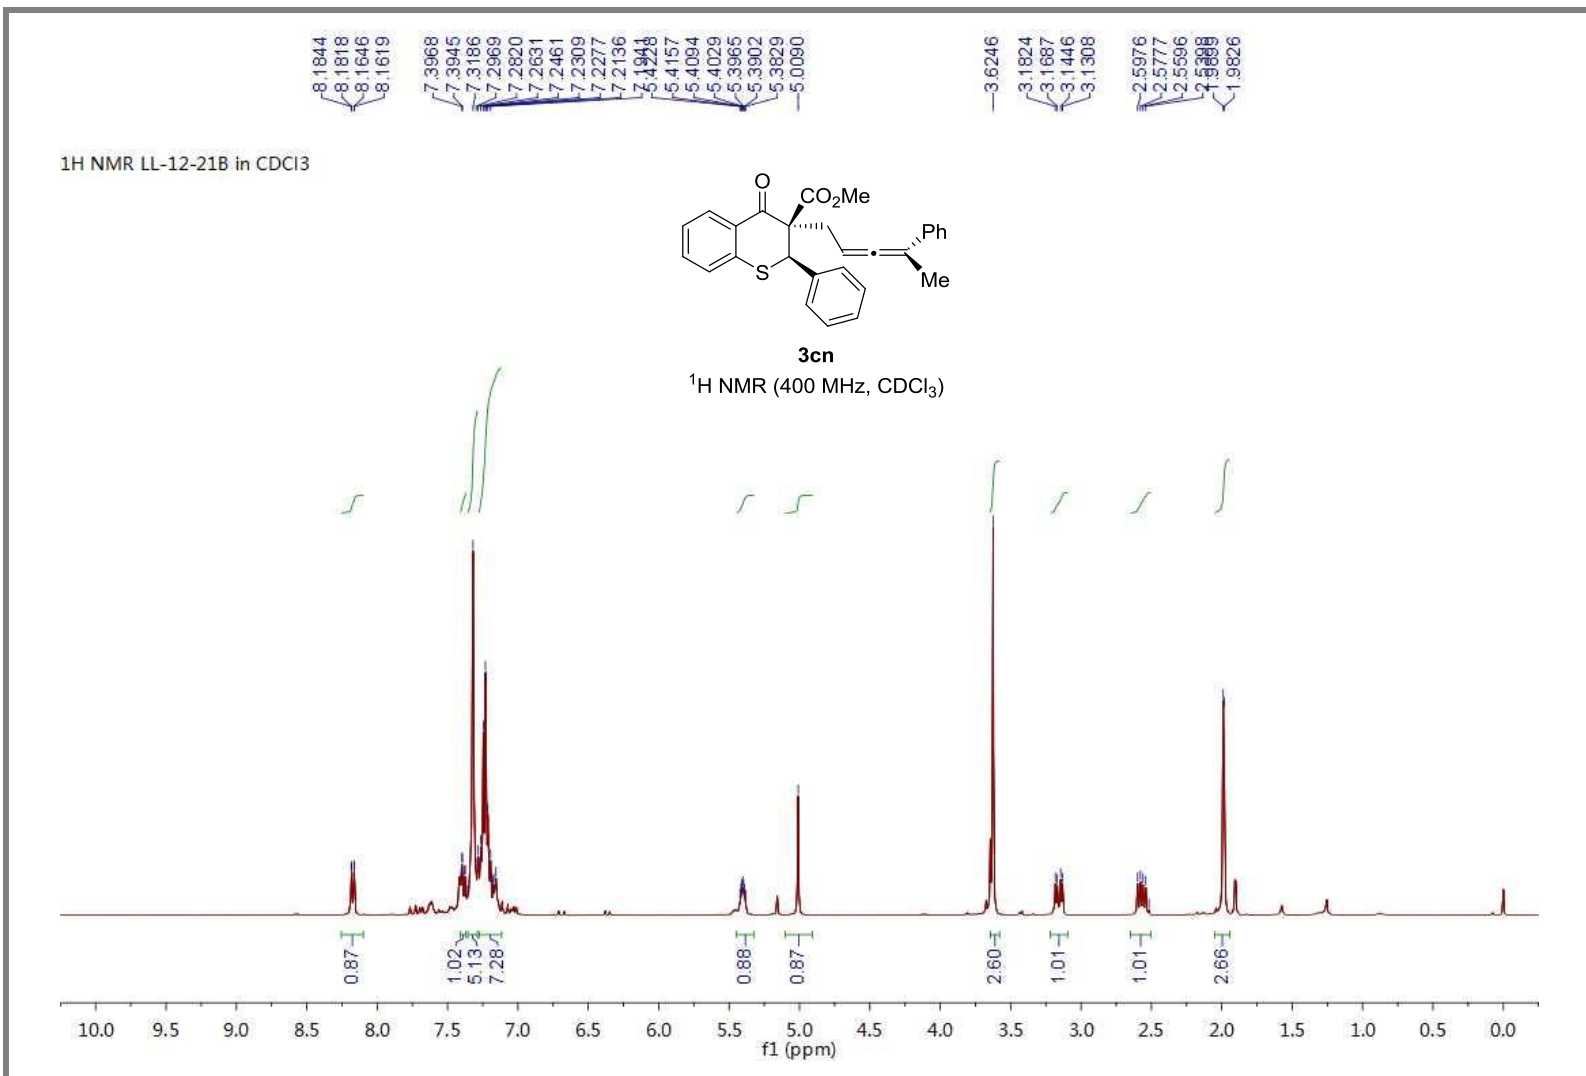

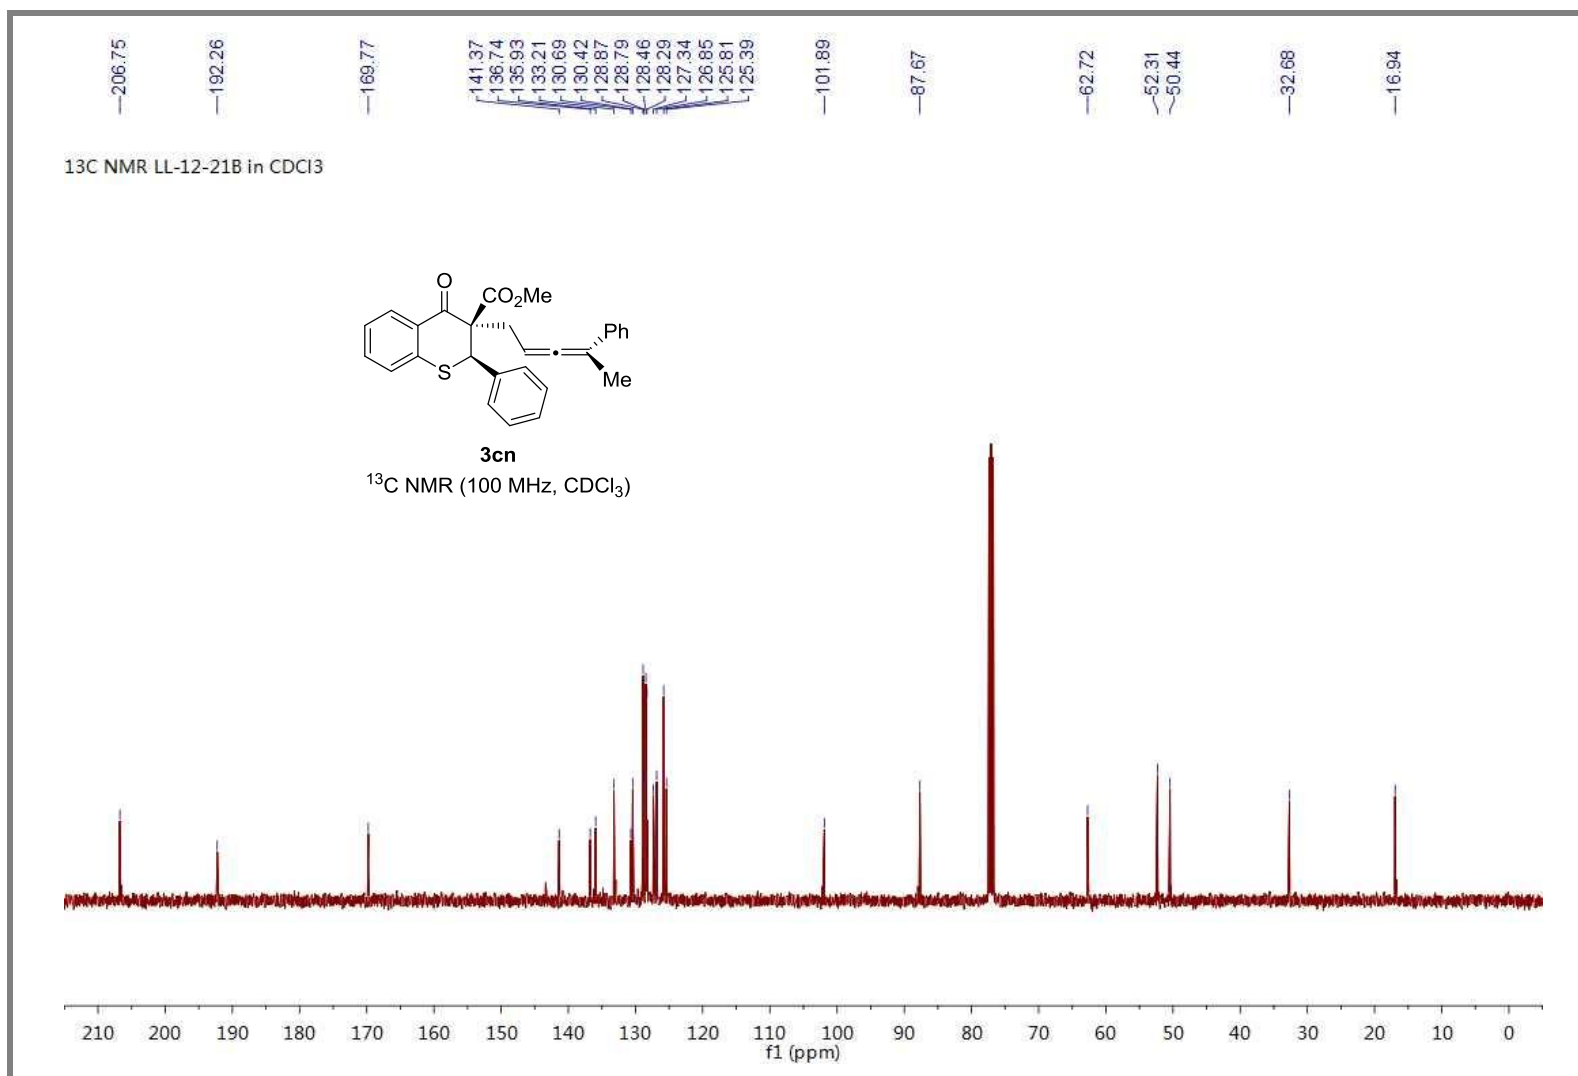



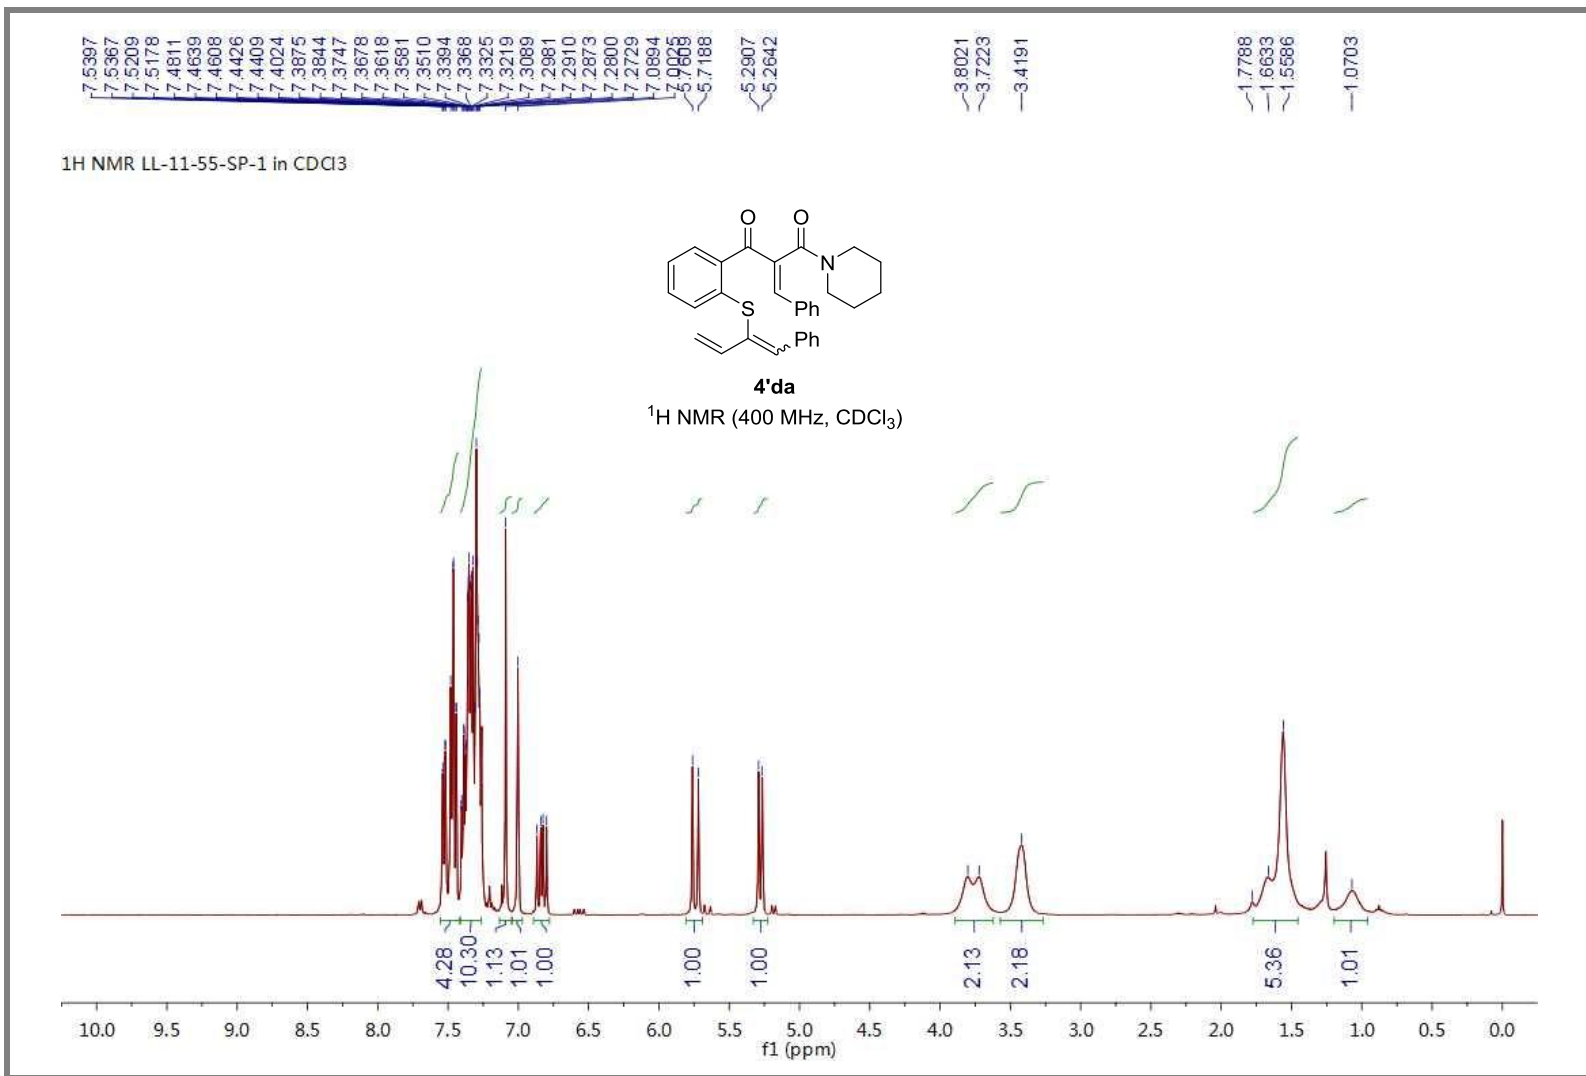

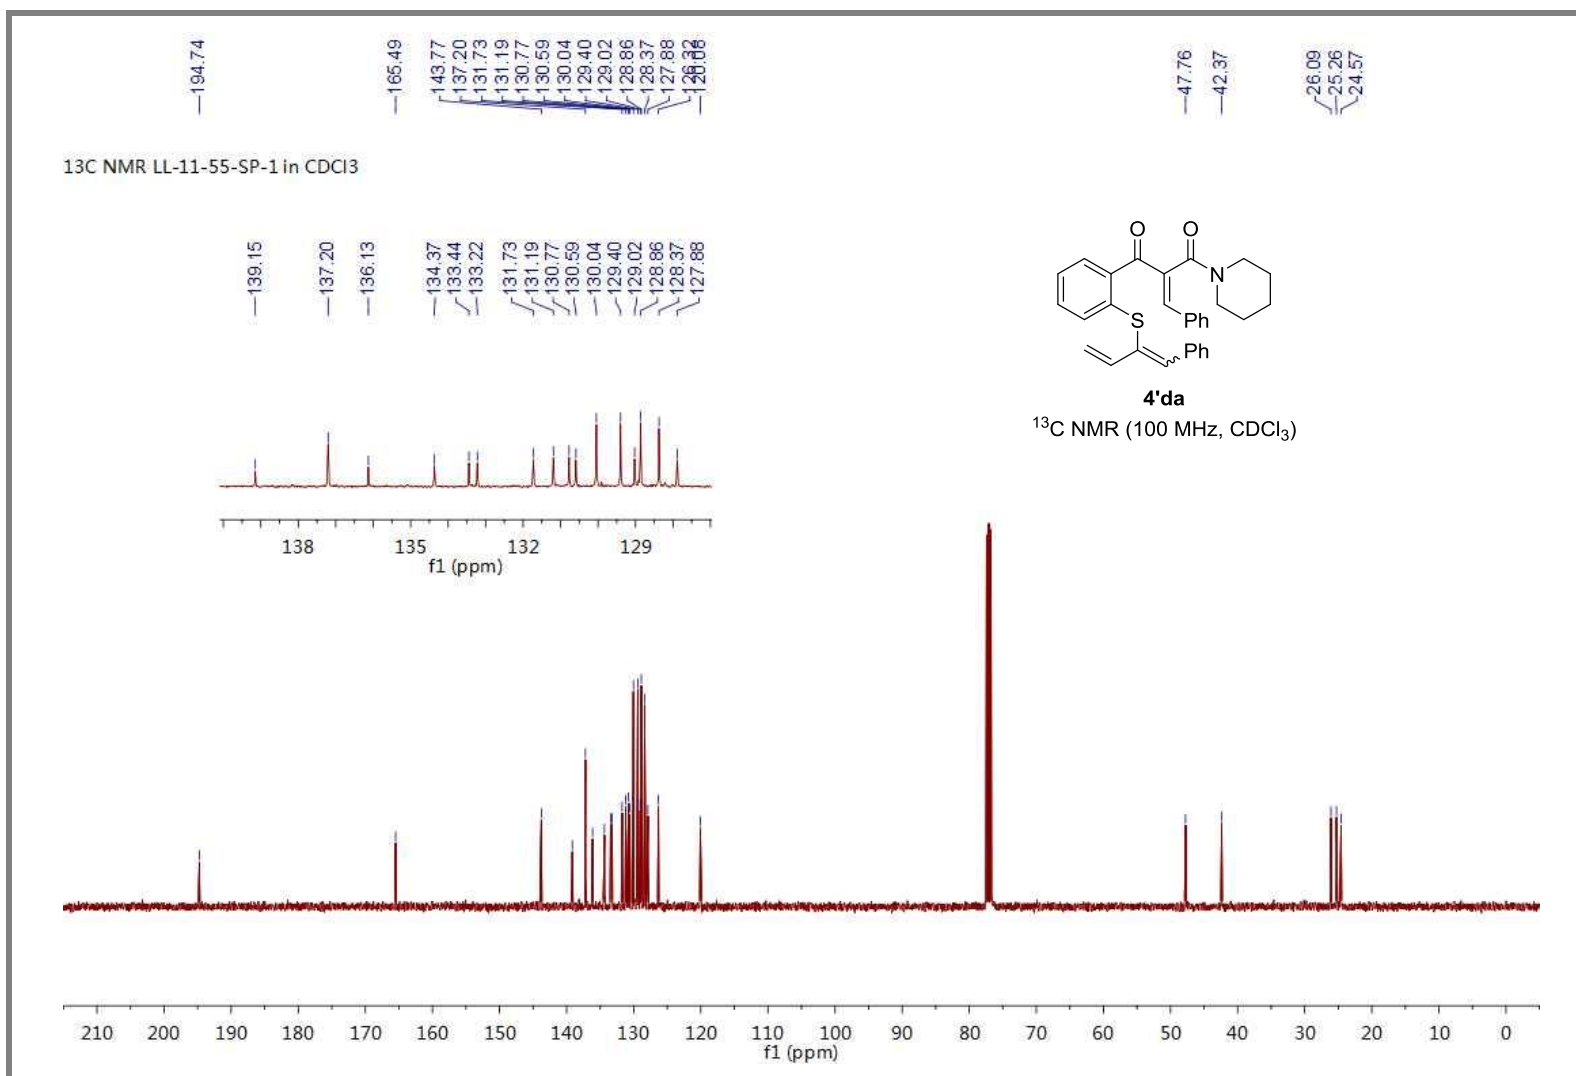

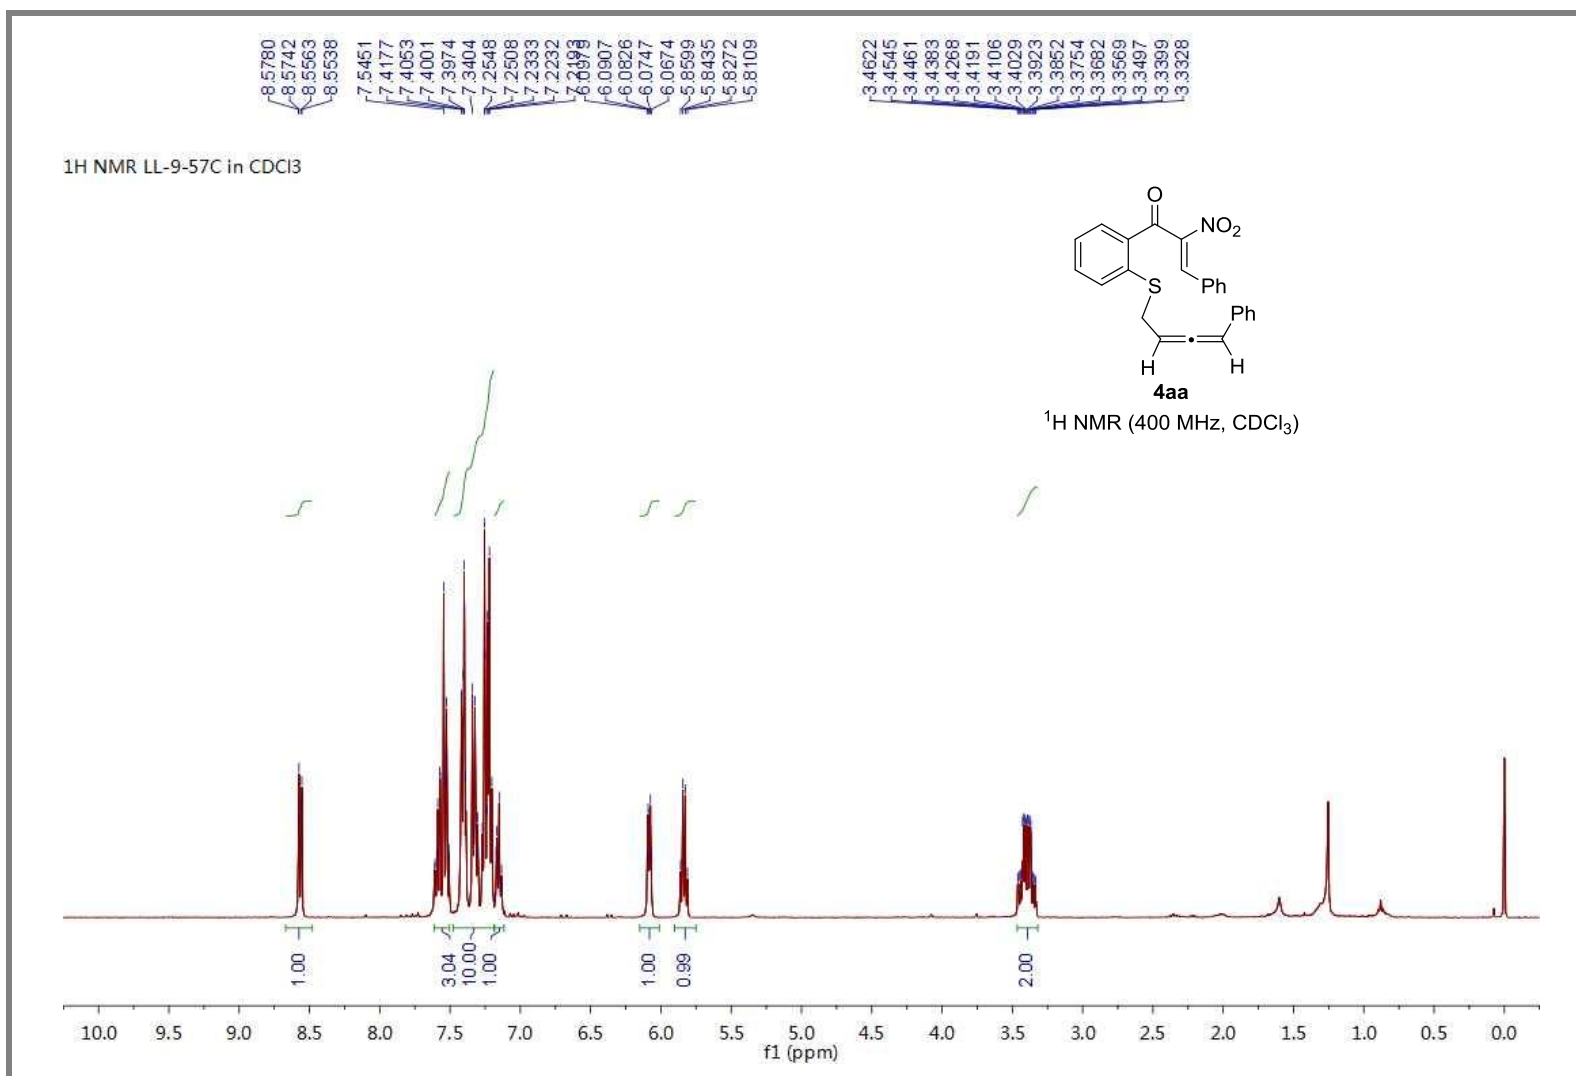

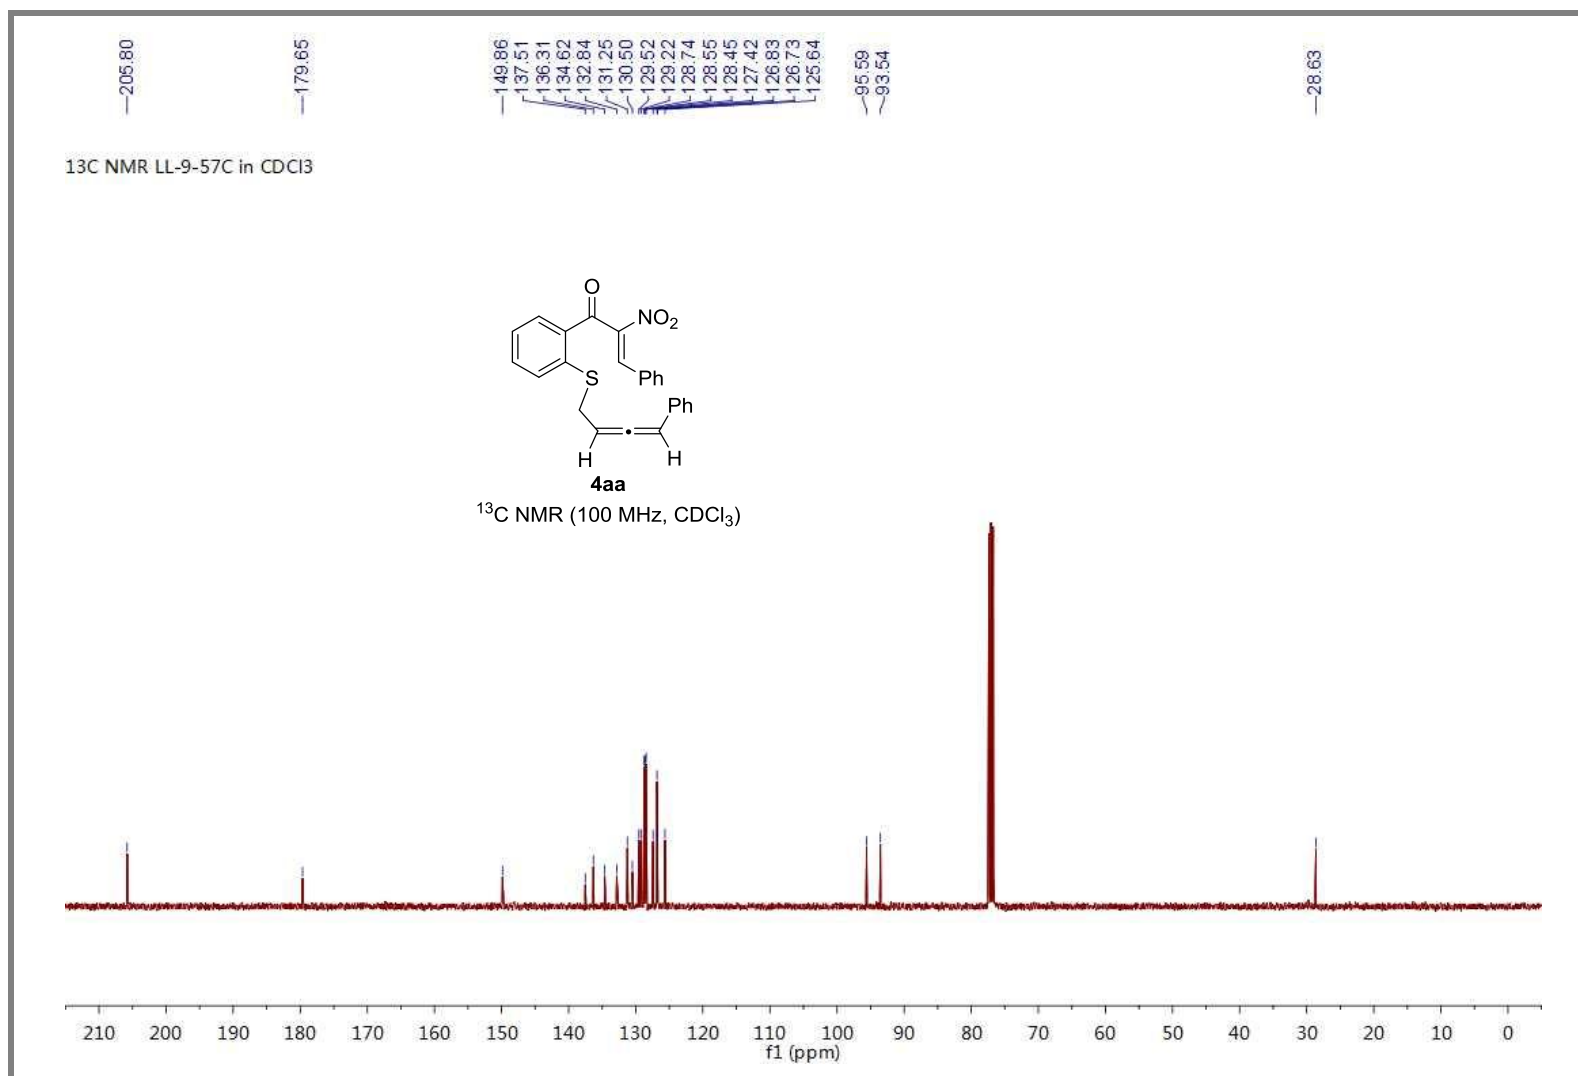

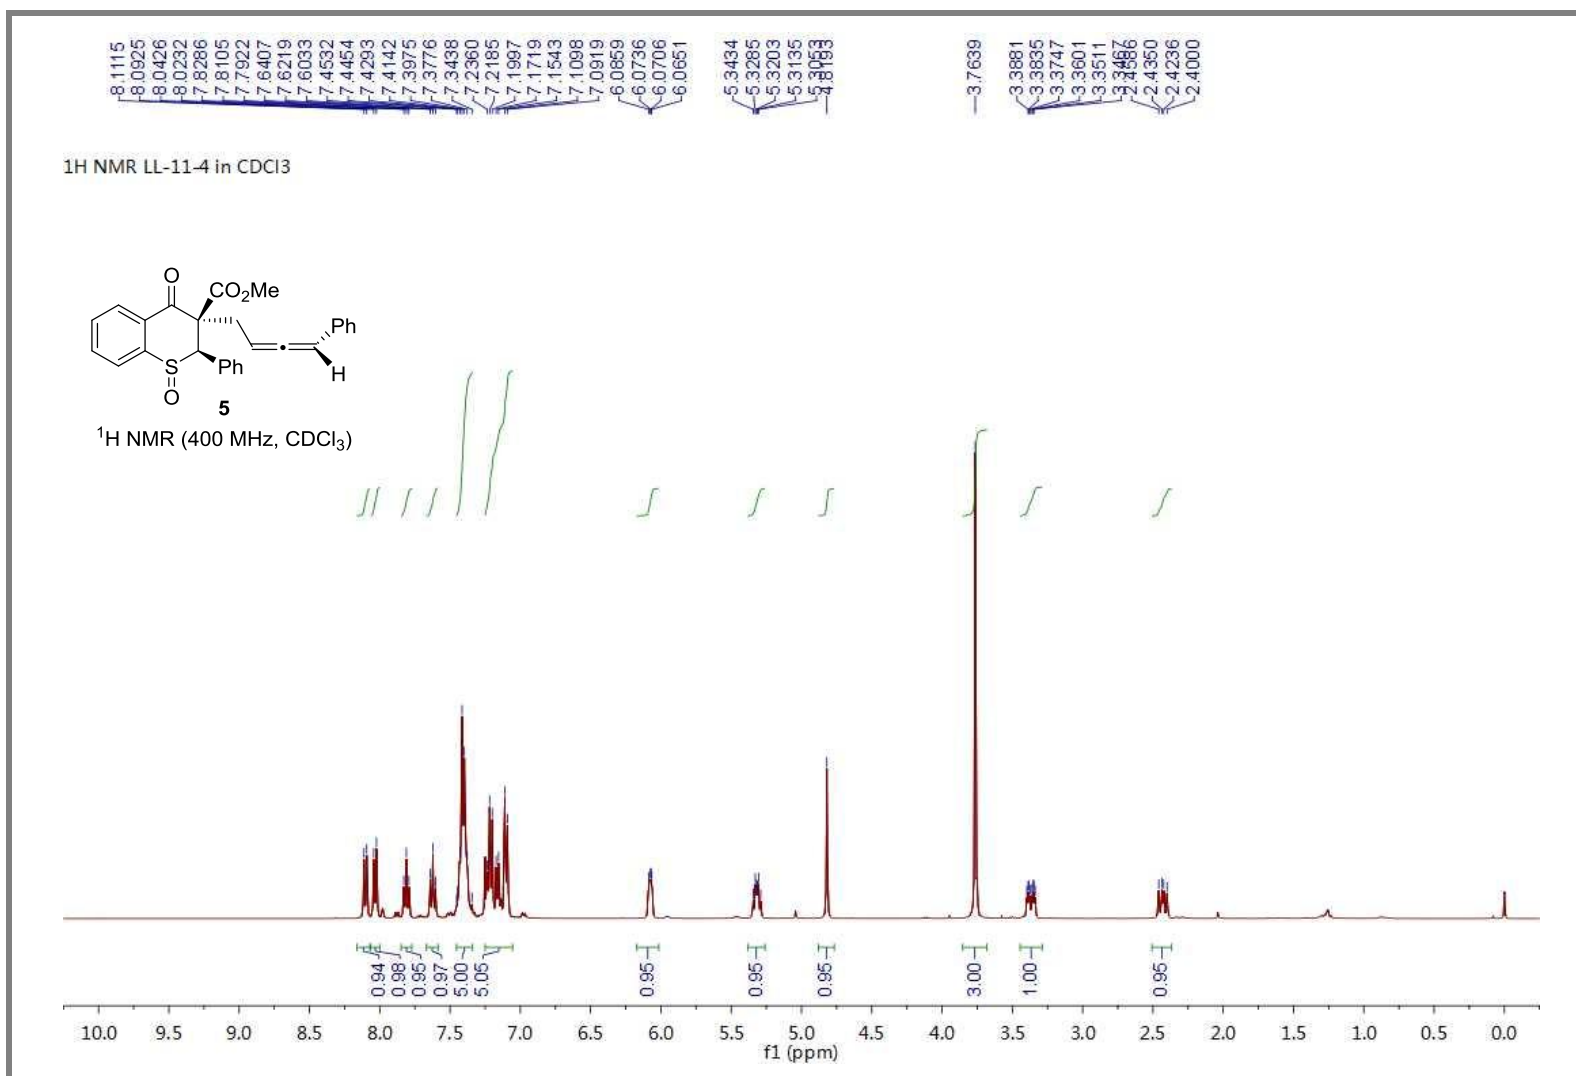

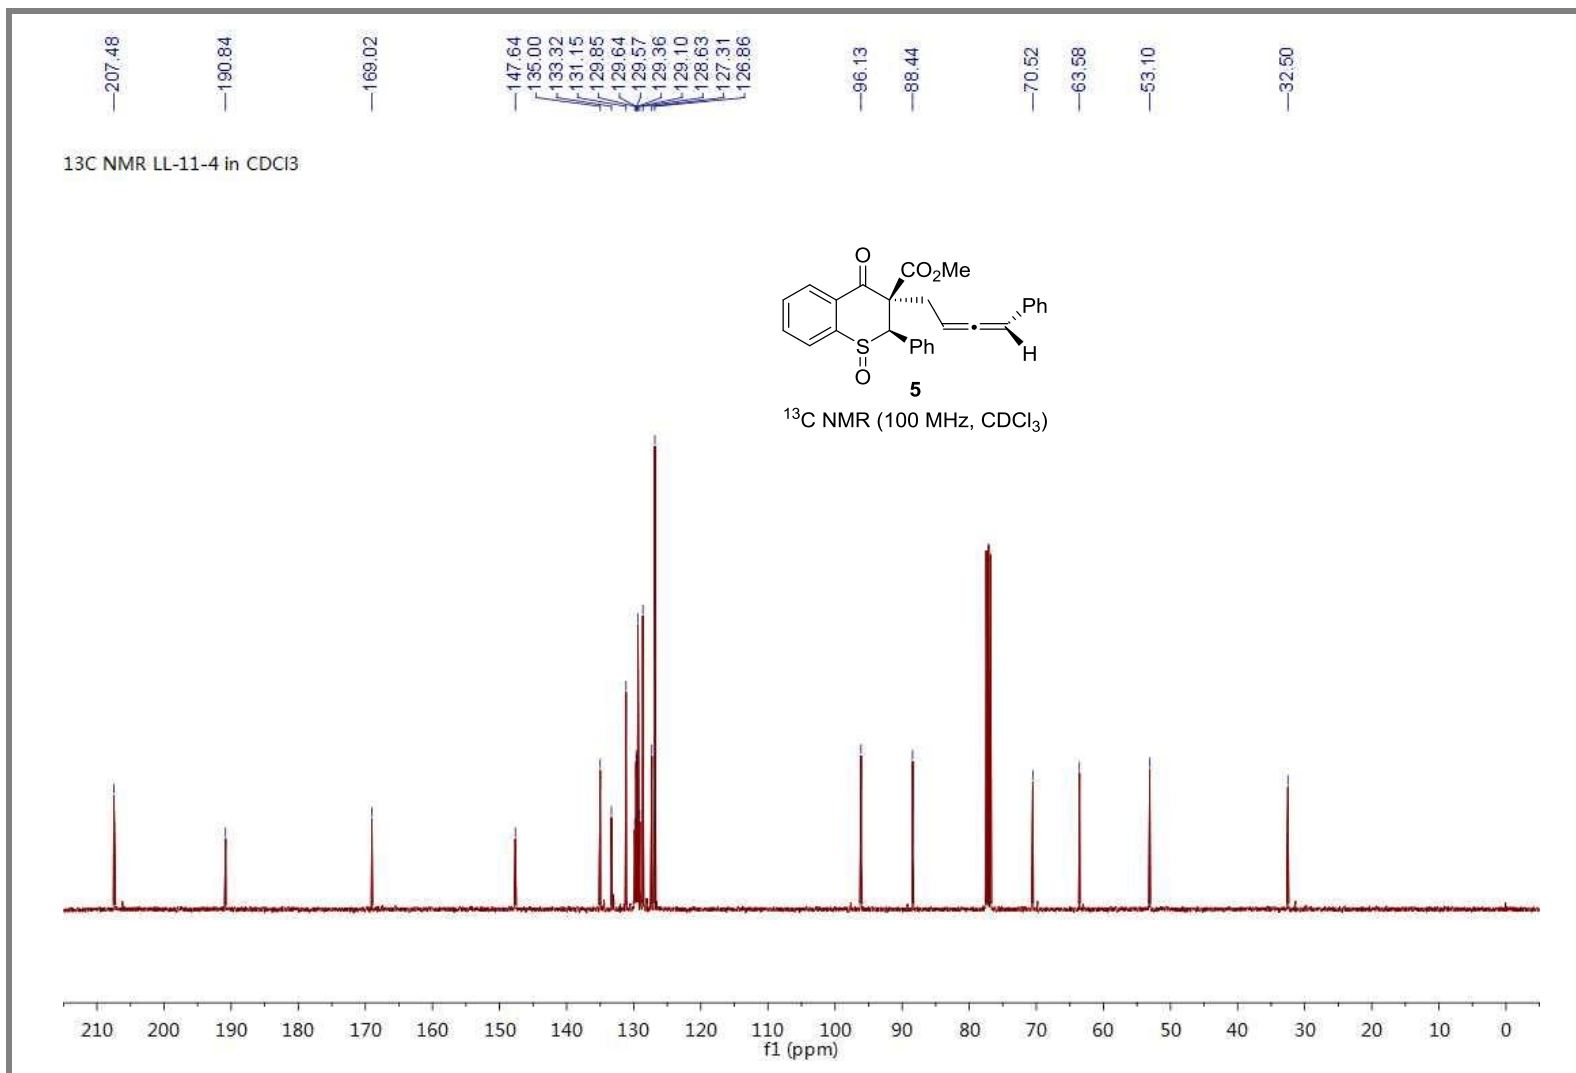

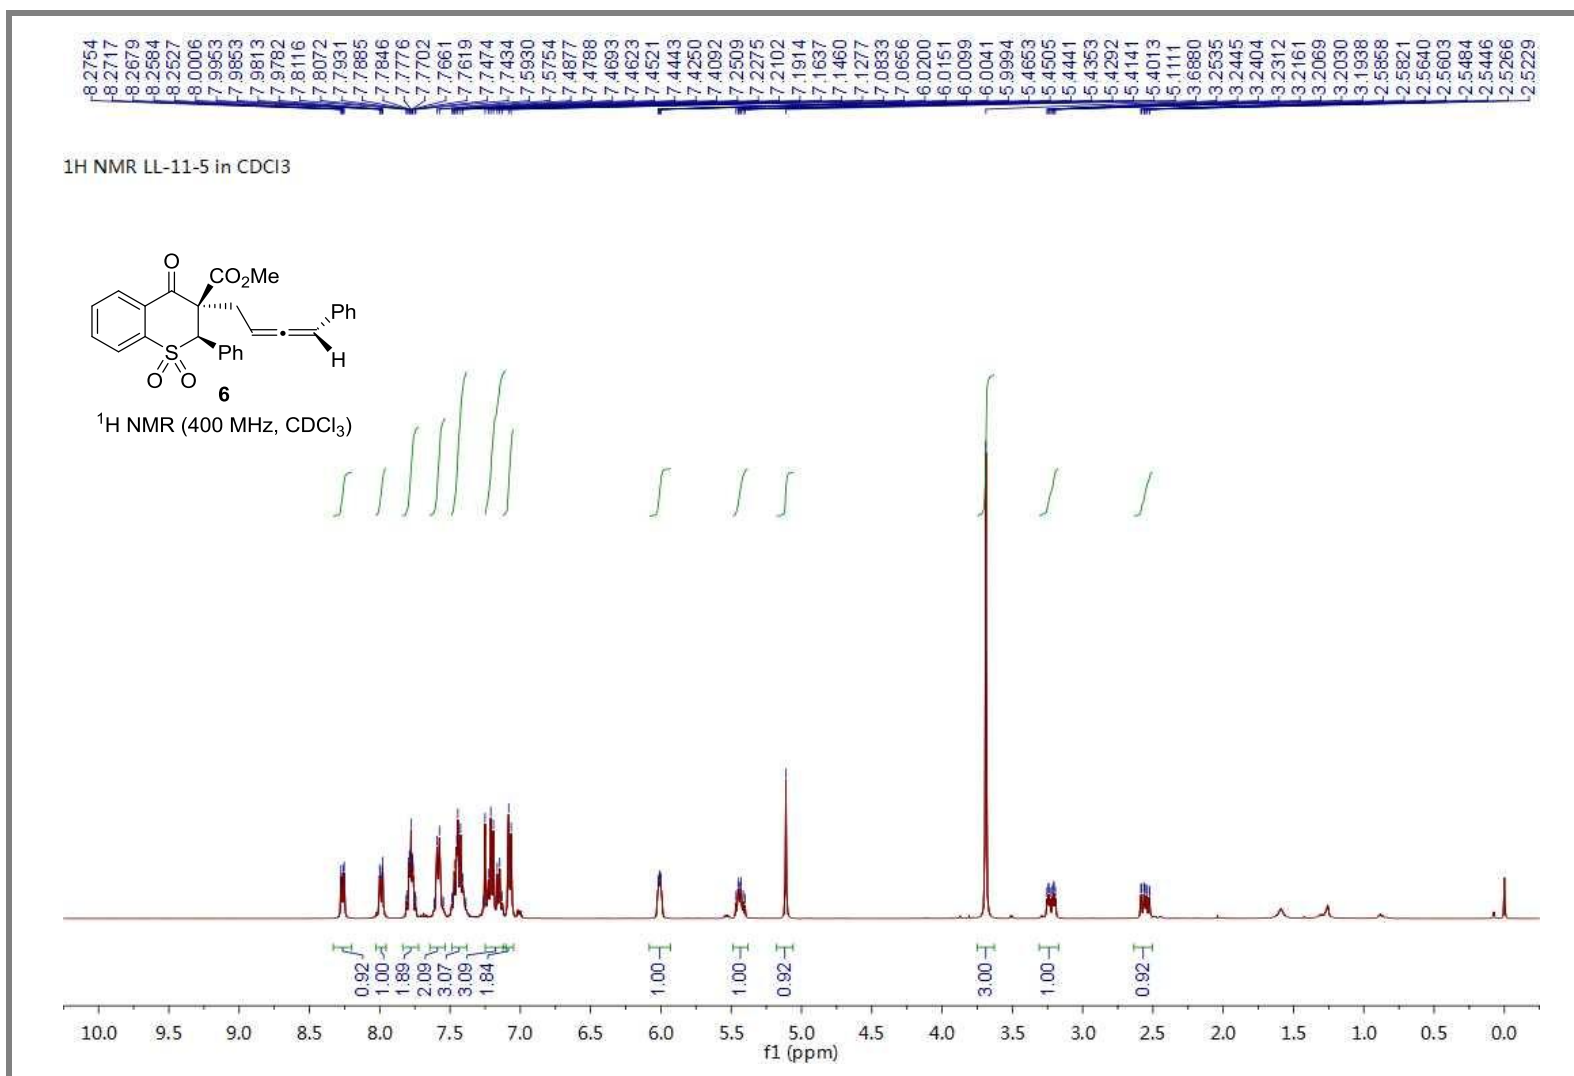

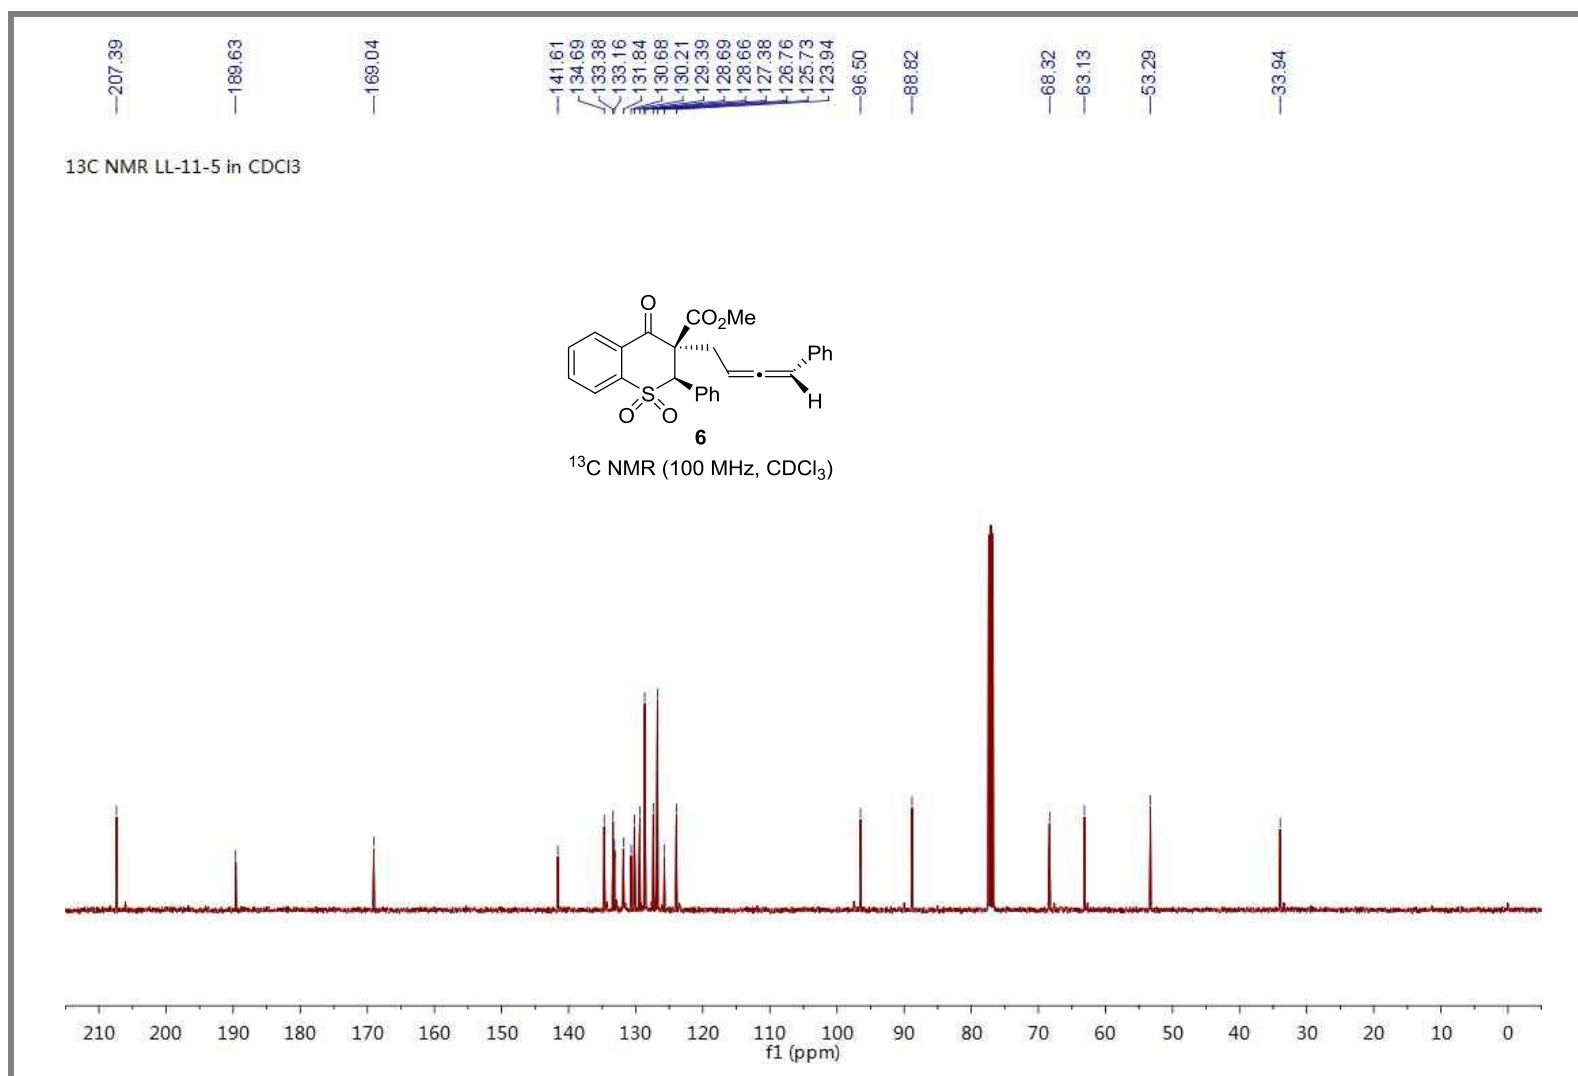



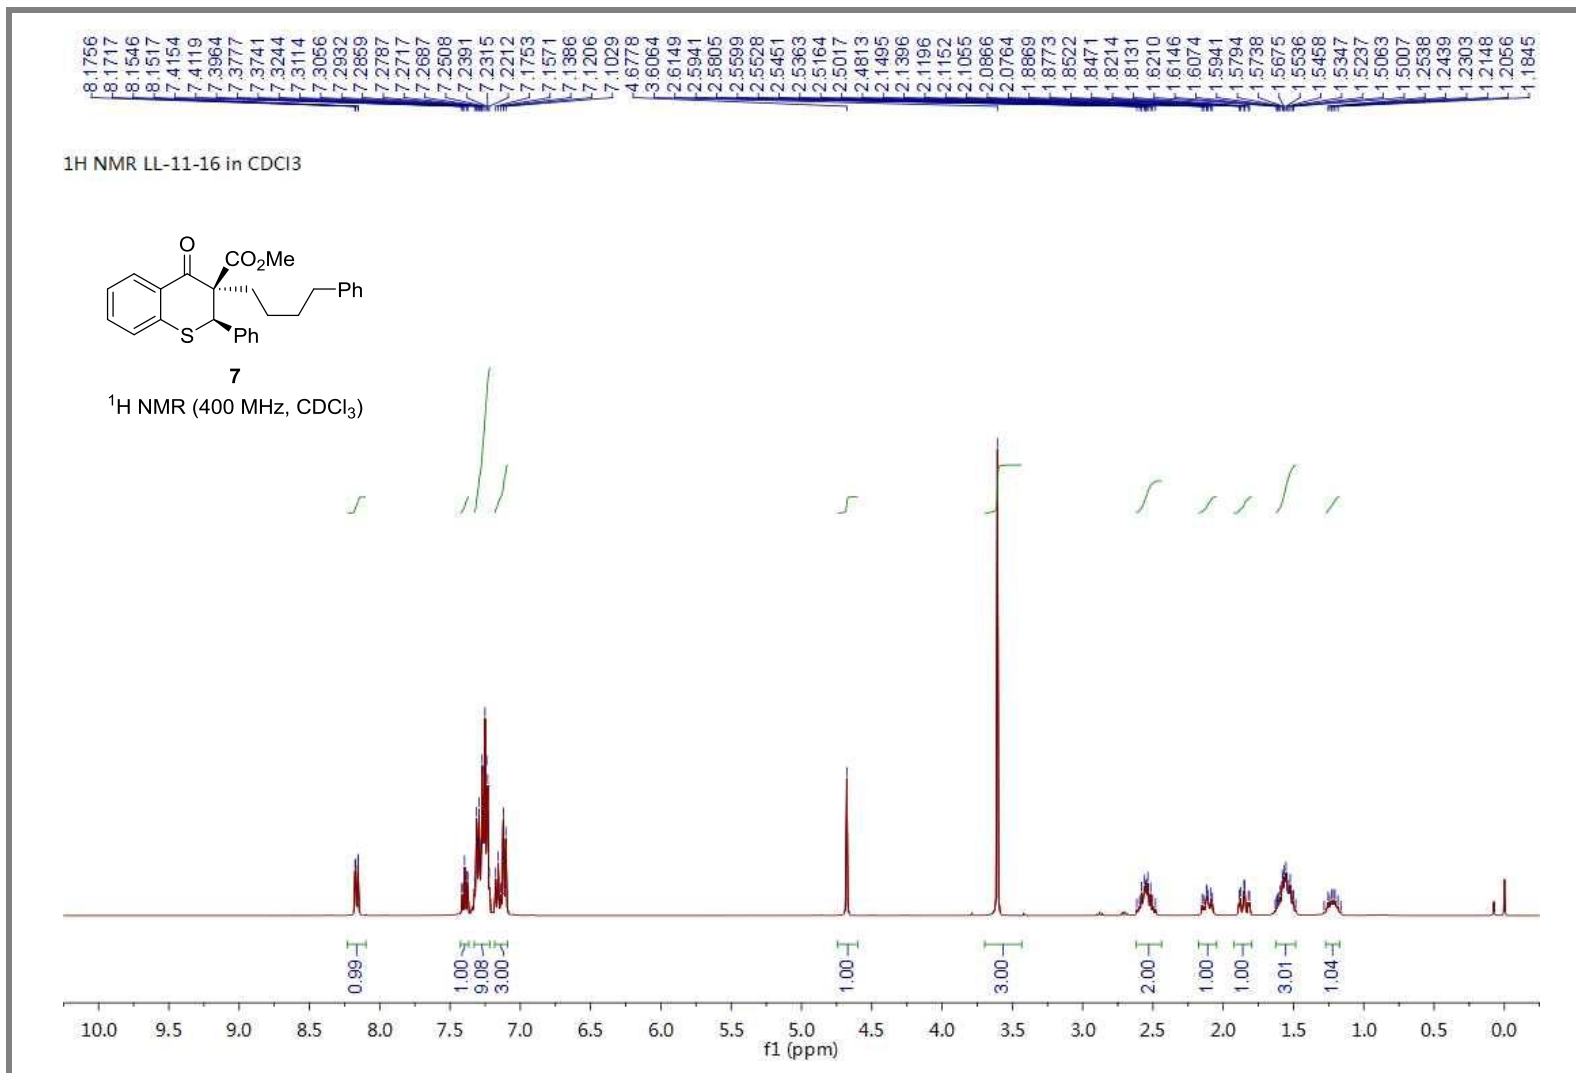

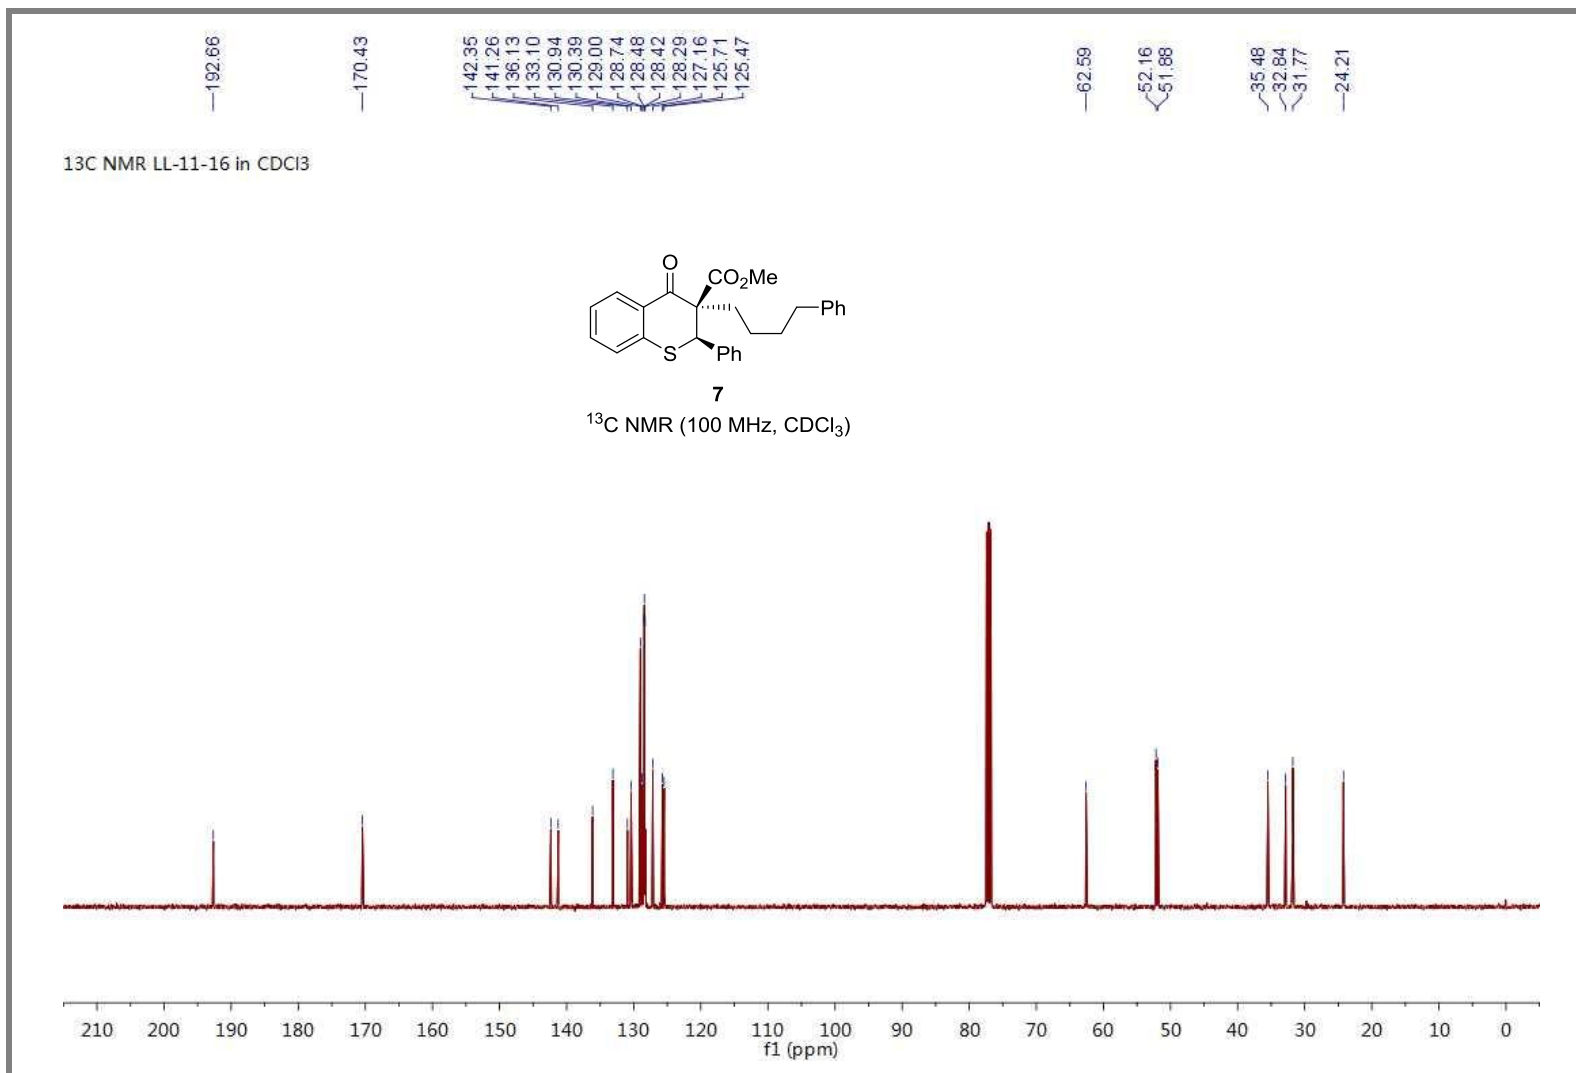

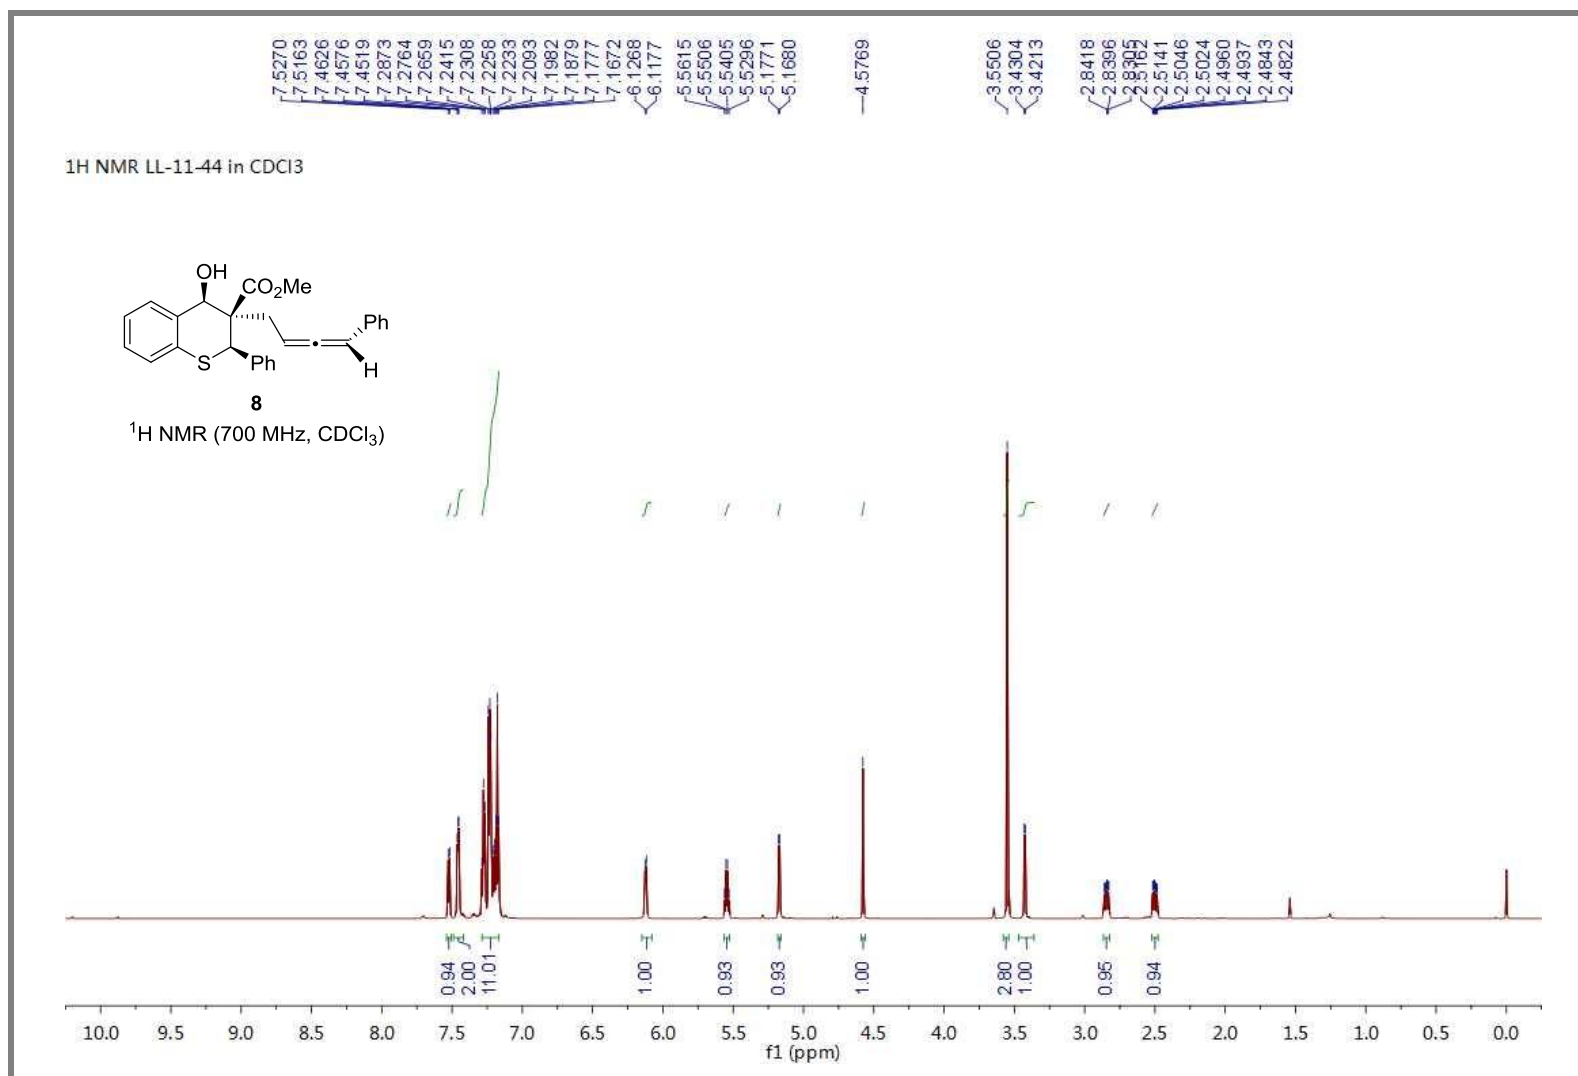

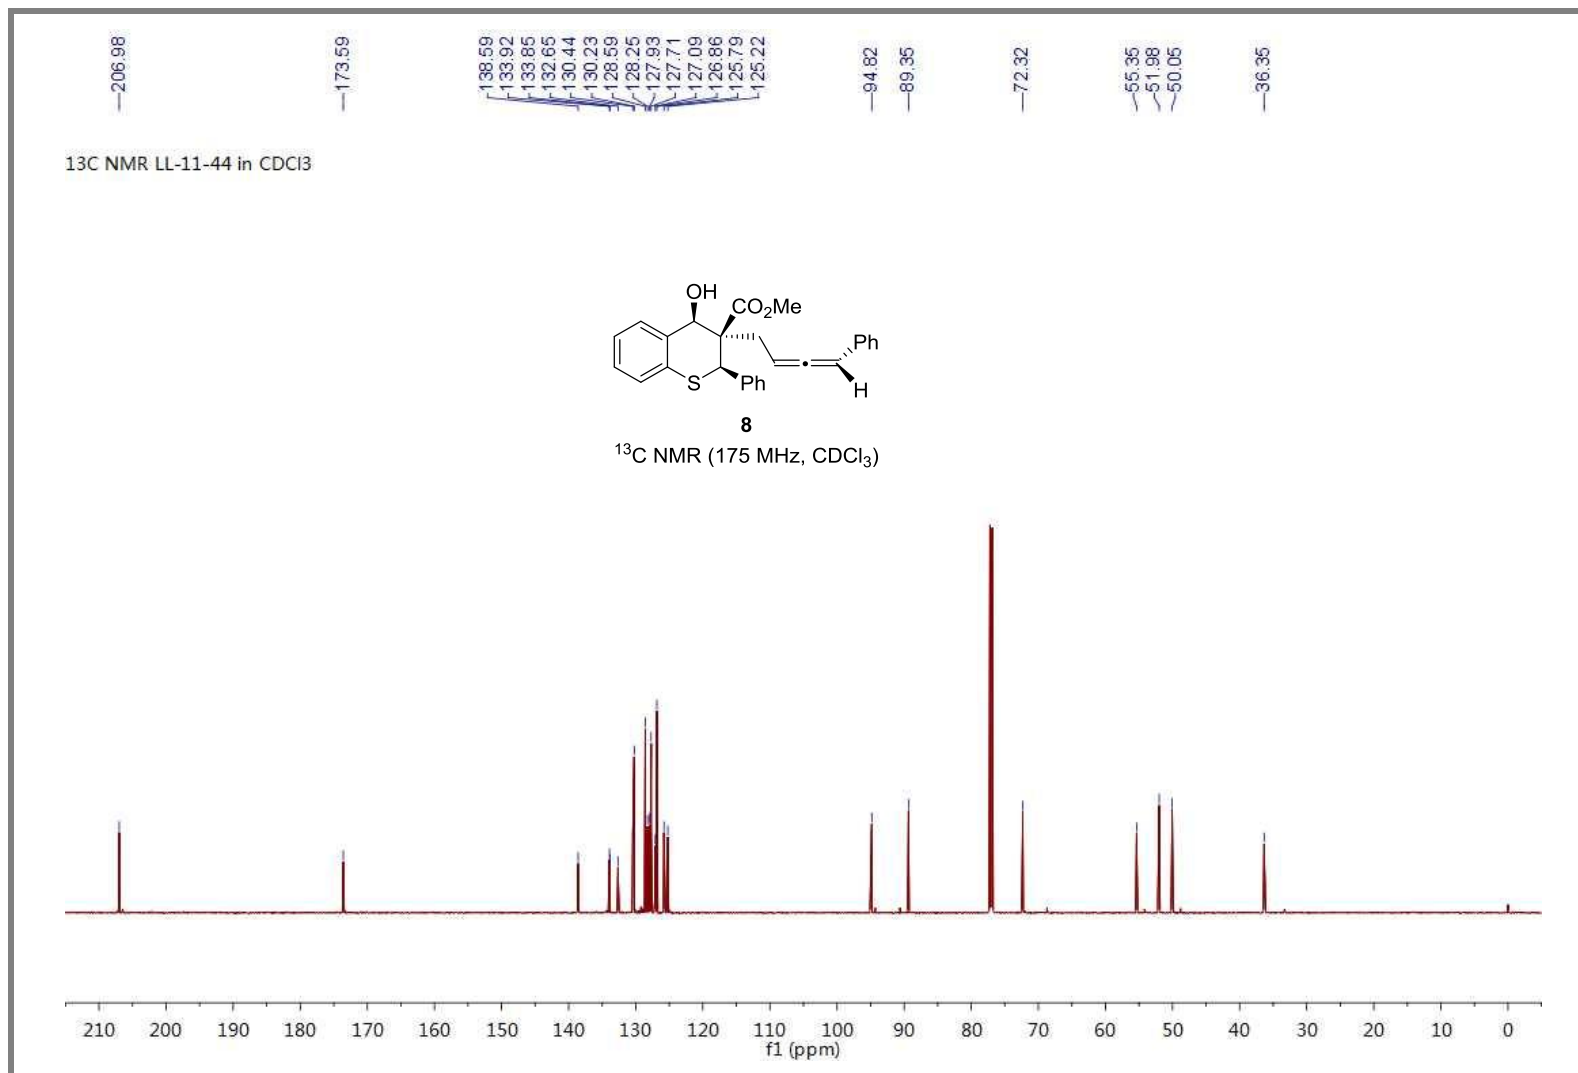

Data File C:\CHEM32\1\DATA\ZHOU-22\YZN021306.D  
 Sample Name: LL-9-96 +/-

=====  
 Acq. Operator :  
 Acq. Instrument : Instrument 1 Location : -  
 Injection Date : 5/31/2022 10:04:59 PM  
 Acq. Method : C:\CHEM32\1\METHODS\DEF\_LC.M  
 Last changed : 5/31/2022 10:03:56 PM  
 (modified after loading)  
 Analysis Method : C:\CHEM32\1\METHODS\DEF\_LC.M  
 Last changed : 6/2/2022 9:05:02 AM  
 (modified after loading)  
 Sample Info : IC, Hexane/i-PrOH = 95/5, 1.0 mL/min, 30 oC, 254 nm

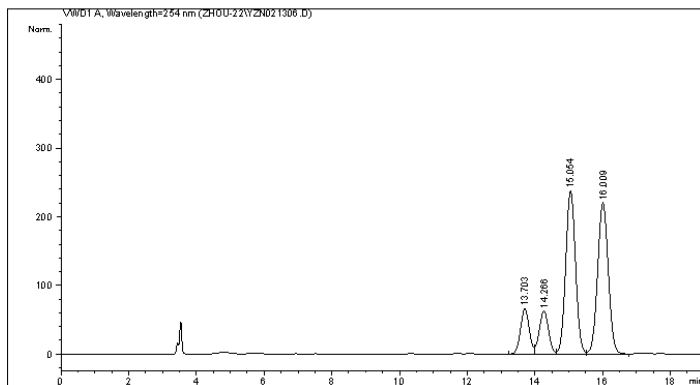

=====  
 Area Percent Report  
 =====

Sorted By : Signal  
 Multiplier: : 1.0000  
 Dilution: : 1.0000  
 Use Multiplier & Dilution Factor with ISTDs

Signal 1: VWD1 A, Wavelength=254 nm

| Peak # | RetTime [min] | Type | Width [min] | Area [mAU*s] | Height [mAU] | Area %  |
|--------|---------------|------|-------------|--------------|--------------|---------|
| 1      | 13.703        | BV   | 0.2796      | 1181.40186   | 65.72604     | 9.8469  |
| 2      | 14.266        | VV   | 0.2934      | 1184.59485   | 62.63682     | 9.8735  |
| 3      | 15.054        | VV   | 0.3161      | 4809.14453   | 237.68280    | 40.0840 |
| 4      | 16.009        | VB   | 0.3413      | 4822.53174   | 220.28629    | 40.1956 |

Totals : 1.19977e4 586.33195

=====  
 \*\*\* End of Report \*\*\*

Instrument 1 6/2/2022 9:05:10 AM

Page 1 of 1

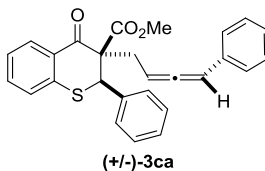

Data File C:\CHEM32\1\DATA\ZHOU-22\YZN021305.D  
 Sample Name: LL-9-96

=====  
 Acq. Operator :  
 Acq. Instrument : Instrument 1 Location : -  
 Injection Date : 5/31/2022 9:44:46 PM  
 Acq. Method : C:\CHEM32\1\METHODS\DEF\_LC.M  
 Last changed : 5/31/2022 9:30:21 PM  
 (modified after loading)  
 Analysis Method : C:\CHEM32\1\METHODS\DEF\_LC.M  
 Last changed : 6/2/2022 9:05:56 AM  
 (modified after loading)  
 Sample Info : IC, Hexane/i-PrOH = 95/5, 1.0 mL/min, 30 oC, 254 nm

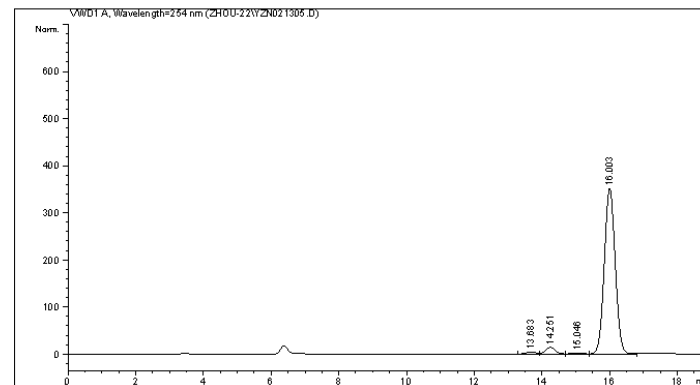

=====  
 Area Percent Report  
 =====

Sorted By : Signal  
 Multiplier: : 1.0000  
 Dilution: : 1.0000  
 Use Multiplier & Dilution Factor with ISTDs

Signal 1: VWD1 A, Wavelength=254 nm

| Peak # | RetTime [min] | Type | Width [min] | Area [mAU*s] | Height [mAU] | Area %  |
|--------|---------------|------|-------------|--------------|--------------|---------|
| 1      | 13.683        | BV   | 0.2830      | 84.60534     | 4.63237      | 1.0251  |
| 2      | 14.251        | VV   | 0.2991      | 264.45209    | 13.81320     | 3.2040  |
| 3      | 15.046        | VV   | 0.2989      | 37.25450     | 1.90967      | 0.4514  |
| 4      | 16.003        | VB   | 0.3487      | 7867.43896   | 351.24875    | 95.3196 |

Totals : 8253.75089 371.60400

=====  
 \*\*\* End of Report \*\*\*

Instrument 1 6/2/2022 9:07:21 AM

Page 1 of 1

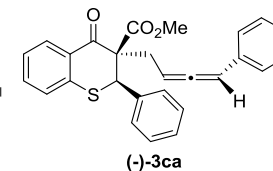

Data File C:\CHEM32\1\DATA\ZHOU-22\YZN021397.D  
 Sample Name: LL-10-10A +/-

=====  
 Acq. Operator :  
 Acq. Instrument : Instrument 1 Location : -  
 Injection Date : 6/16/2022 9:58:20 PM  
 Acq. Method : C:\CHEM32\1\METHODS\DEF\_LC.M  
 Last changed : 6/16/2022 9:50:17 PM  
 (modified after loading)  
 Analysis Method : C:\CHEM32\1\METHODS\DEF\_LC.M  
 Last changed : 6/17/2022 9:57:36 AM  
 (modified after loading)  
 Sample Info : ID, Hexane/i-PrOH = 97/3, 1.0 mL/min, 30 oC, 254 nm

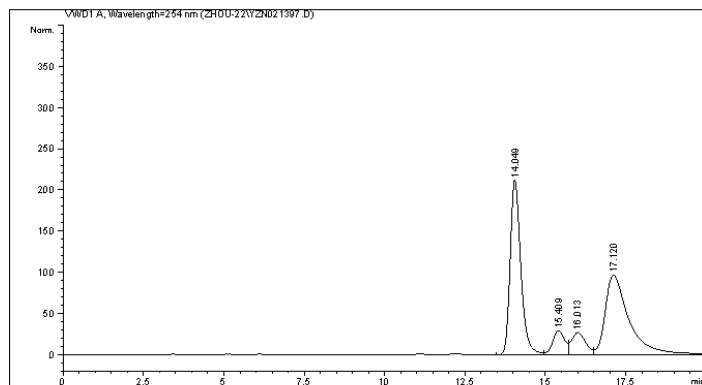

=====  
 Area Percent Report  
 =====

Sorted By : Signal  
 Multiplier: : 1.0000  
 Dilution: : 1.0000  
 Use Multiplier & Dilution Factor with ISTDs

Signal 1: WVD1 A, Wavelength=254 nm

| Peak # | RetTime [min] | Type | Width [min] | Area [mAU*s] | Height [mAU] | Area %  |
|--------|---------------|------|-------------|--------------|--------------|---------|
| 1      | 14.049        | VV   | 0.3526      | 4865.26904   | 211.67204    | 42.6194 |
| 2      | 15.409        | VV   | 0.3884      | 746.58508    | 29.21757     | 6.5400  |
| 3      | 16.013        | VV   | 0.4594      | 821.14044    | 26.80166     | 7.1931  |
| 4      | 17.120        | VBA  | 0.7535      | 4982.61914   | 96.54684     | 43.6474 |

Totals : 1.14156e4 364.23812

=====  
 \*\*\* End of Report \*\*\*

Instrument 1 6/17/2022 9:57:44 AM

Page 1 of 1

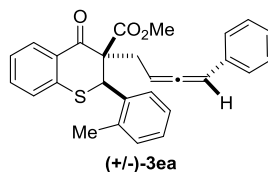

Data File C:\CHEM32\1\DATA\ZHOU-22\YZN021396.D  
 Sample Name: LL-10-10A

=====  
 Acq. Operator :  
 Acq. Instrument : Instrument 1 Location : -  
 Injection Date : 6/16/2022 9:28:37 PM  
 Acq. Method : C:\CHEM32\1\METHODS\DEF\_LC.M  
 Last changed : 6/16/2022 9:13:30 PM  
 (modified after loading)  
 Analysis Method : C:\CHEM32\1\METHODS\DEF\_LC.M  
 Last changed : 6/17/2022 9:56:51 AM  
 (modified after loading)  
 Sample Info : ID, Hexane/i-PrOH = 97/3, 1.0 mL/min, 30 oC, 254 nm

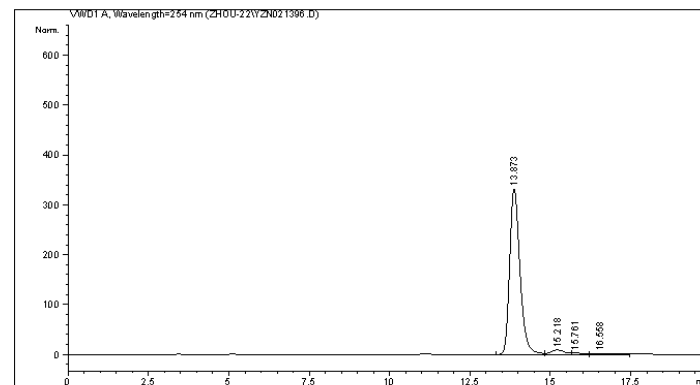

=====  
 Area Percent Report  
 =====

Sorted By : Signal  
 Multiplier: : 1.0000  
 Dilution: : 1.0000  
 Use Multiplier & Dilution Factor with ISTDs

Signal 1: WVD1 A, Wavelength=254 nm

| Peak # | RetTime [min] | Type | Width [min] | Area [mAU*s] | Height [mAU] | Area %  |
|--------|---------------|------|-------------|--------------|--------------|---------|
| 1      | 13.873        | VV   | 0.3277      | 7385.88330   | 332.60446    | 94.6470 |
| 2      | 15.218        | VV   | 0.4480      | 263.34531    | 8.87867      | 3.3747  |
| 3      | 15.761        | VV   | 0.3517      | 69.32341     | 2.84078      | 0.8884  |
| 4      | 16.558        | VV   | 0.7494      | 85.05629     | 1.57499      | 1.0900  |

Totals : 7803.60831 345.89890

=====  
 \*\*\* End of Report \*\*\*

Instrument 1 6/17/2022 9:57:00 AM

Page 1 of 1

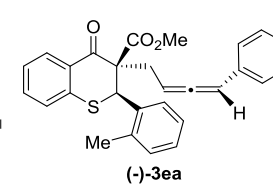

Data File C:\CHEM32\1\DATA\ZHOU-22\YZN021399.D  
Sample Name: LL-10-10B +/-

=====  
Acq. Operator :  
Acq. Instrument : Instrument 1 Location : -  
Injection Date : 6/16/2022 11:12:53 PM  
Acq. Method : C:\CHEM32\1\METHODS\DEF\_LC.M  
Last changed : 6/16/2022 11:11:23 PM  
(modified after loading)  
Analysis Method : C:\CHEM32\1\METHODS\DEF\_LC.M  
Last changed : 6/17/2022 10:03:43 AM  
(modified after loading)  
Sample Info : OD-3, Hexane/i-PrOH = 95/5, 0.8 mL/min, 30 oC, 254 nm

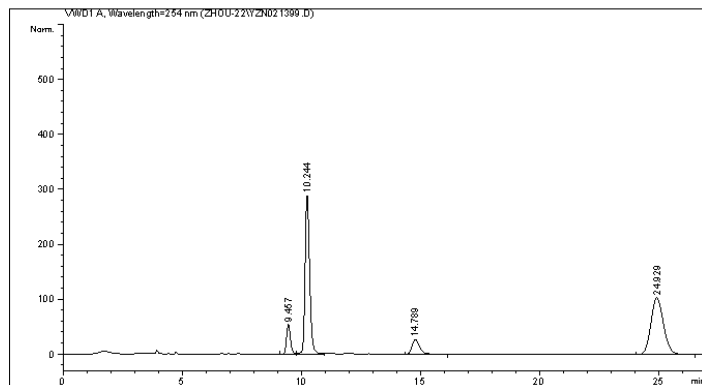

=====  
Area Percent Report  
=====

Sorted By : Signal  
Multiplier: : 1.0000  
Dilution: : 1.0000  
Use Multiplier & Dilution Factor with ISTDs

Signal 1: VWD1 A, Wavelength=254 nm

| Peak # | RetTime [min] | Type | Width [min] | Area [mAU] | Height [mAU] | Area %  |
|--------|---------------|------|-------------|------------|--------------|---------|
| 1      | 9.457         | VV   | 0.1777      | 618.70984  | 53.87775     | 6.9623  |
| 2      | 10.244        | VV   | 0.2054      | 3865.48975 | 289.33228    | 43.4980 |
| 3      | 14.789        | VB   | 0.3386      | 599.61310  | 26.90870     | 6.7474  |
| 4      | 24.929        | BB   | 0.5717      | 3802.77173 | 103.42006    | 42.7923 |

Totals : 8886.58441 473.53879

=====  
\*\*\* End of Report \*\*\*

Instrument 1 6/17/2022 10:03:47 AM

Page 1 of 1

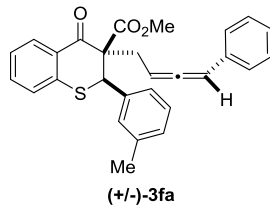

Data File C:\CHEM32\1\DATA\ZHOU-22\YZN021398.D  
Sample Name: LL-10-10B

=====  
Acq. Operator :  
Acq. Instrument : Instrument 1 Location : -  
Injection Date : 6/16/2022 10:37:23 PM  
Acq. Method : C:\CHEM32\1\METHODS\DEF\_LC.M  
Last changed : 6/16/2022 10:20:50 PM  
(modified after loading)  
Analysis Method : C:\CHEM32\1\METHODS\DEF\_LC.M  
Last changed : 6/17/2022 10:03:08 AM  
(modified after loading)  
Sample Info : OD-3, Hexane/i-PrOH = 95/5, 0.8 mL/min, 30 oC, 254 nm

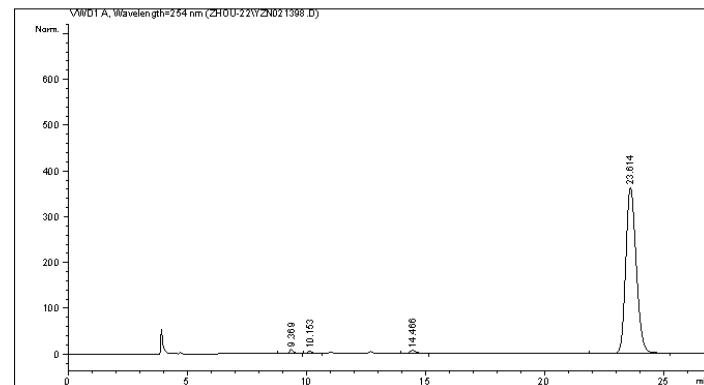

=====  
Area Percent Report  
=====

Sorted By : Signal  
Multiplier: : 1.0000  
Dilution: : 1.0000  
Use Multiplier & Dilution Factor with ISTDs

Signal 1: VWD1 A, Wavelength=254 nm

| Peak # | RetTime [min] | Type | Width [min] | Area [mAU] | Height [mAU] | Area %  |
|--------|---------------|------|-------------|------------|--------------|---------|
| 1      | 9.369         | VB   | 0.1970      | 126.27138  | 9.42724      | 1.0969  |
| 2      | 10.153        | BB   | 0.2182      | 80.58767   | 5.57237      | 0.7000  |
| 3      | 14.466        | VB   | 0.3299      | 141.23883  | 6.48234      | 1.2269  |
| 4      | 23.614        | VV   | 0.4786      | 1.11640e4  | 362.64539    | 96.9763 |

Totals : 1.15121e4 384.12733

=====  
\*\*\* End of Report \*\*\*

Instrument 1 6/17/2022 10:03:14 AM

Page 1 of 1

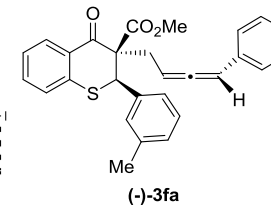

Data File C:\CHEM32\1\DATA\ZHOU-22\YZN021401.D  
 Sample Name: LL-10-10C +/-

=====  
 Acq. Operator :  
 Acq. Instrument : Instrument 1 Location : -  
 Injection Date : 6/17/2022 12:22:05 AM  
 Acq. Method : C:\CHEM32\1\METHODS\DEF\_LC.M  
 Last changed : 6/17/2022 12:20:56 AM  
 (modified after loading)  
 Analysis Method : C:\CHEM32\1\METHODS\DEF\_LC.M  
 Last changed : 6/18/2022 1:56:11 AM  
 (modified after loading)  
 Sample Info : IA, Hexane/i-PrOH = 95/5, 1.0 mL/min, 30 oC, 254 nm

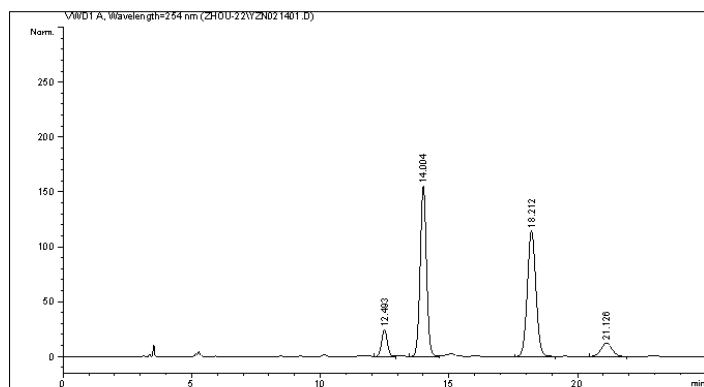

=====  
 Area Percent Report  
 =====

Sorted By : Signal  
 Multiplier: : 1.0000  
 Dilution: : 1.0000  
 Use Multiplier & Dilution Factor with ISTDs

Signal 1: VWD1 A, Wavelength=254 nm

| Peak # | RetTime [min] | Type | Width [min] | Area [mAU] | Height [mAU] | Area %  |
|--------|---------------|------|-------------|------------|--------------|---------|
| 1      | 12.493        | VB   | 0.2410      | 379.17752  | 24.40358     | 6.2095  |
| 2      | 14.004        | VB   | 0.2654      | 2677.81982 | 155.15761    | 43.8525 |
| 3      | 18.212        | EB   | 0.3598      | 2676.45337 | 114.61832    | 43.8301 |
| 4      | 21.126        | BB   | 0.4633      | 372.97498  | 12.39067     | 6.1079  |

Totals : 6106.42569 306.57018

=====  
 \*\*\* End of Report \*\*\*

Instrument 1 6/18/2022 1:56:15 AM

Page 1 of 1

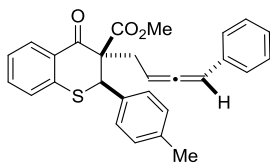

Data File C:\CHEM32\1\DATA\ZHOU-22\YZN021407.D  
 Sample Name: LL-10-10C

=====  
 Acq. Operator :  
 Acq. Instrument : Instrument 1 Location : -  
 Injection Date : 6/17/2022 8:25:19 PM  
 Acq. Method : C:\CHEM32\1\METHODS\DEF\_LC.M  
 Last changed : 6/17/2022 8:01:10 PM  
 (modified after loading)  
 Analysis Method : C:\CHEM32\1\METHODS\DEF\_LC.M  
 Last changed : 6/18/2022 1:55:37 AM  
 (modified after loading)  
 Sample Info : IA, Hexane/i-PrOH = 95/5, 1.0 mL/min, 30 oC, 254 nm

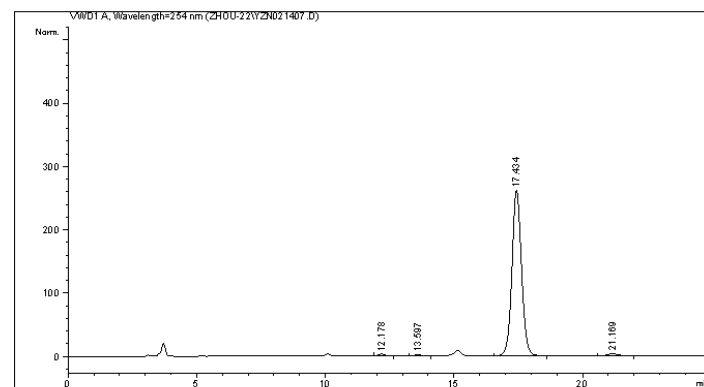

=====  
 Area Percent Report  
 =====

Sorted By : Signal  
 Multiplier: : 1.0000  
 Dilution: : 1.0000  
 Use Multiplier & Dilution Factor with ISTDs

Signal 1: VWD1 A, Wavelength=254 nm

| Peak # | RetTime [min] | Type | Width [min] | Area [mAU] | Height [mAU] | Area %  |
|--------|---------------|------|-------------|------------|--------------|---------|
| 1      | 12.178        | VB   | 0.2871      | 63.09805   | 3.25846      | 0.9013  |
| 2      | 13.597        | VB   | 0.3102      | 46.35885   | 2.30663      | 0.6622  |
| 3      | 17.434        | EB   | 0.3974      | 6776.02734 | 262.32910    | 96.7889 |
| 4      | 21.169        | BB   | 0.4919      | 115.34654  | 3.64128      | 1.6476  |

Totals : 7000.83079 271.53548

=====  
 \*\*\* End of Report \*\*\*

Instrument 1 6/18/2022 1:55:48 AM

Page 1 of 1

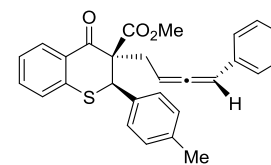



Data File C:\CHEM32\1\DATA\ZHOU-22\YZN021461.D  
 Sample Name: LL-10-25A +/-

=====  
 Acq. Operator :  
 Acq. Instrument : Instrument 1 Location : -  
 Injection Date : 6/30/2022 9:14:24 PM  
 Acq. Method : C:\CHEM32\1\METHODS\DEF\_LC.M  
 Last changed : 6/30/2022 9:11:25 PM  
 (modified after loading)  
 Analysis Method : C:\CHEM32\1\METHODS\DEF\_LC.M  
 Last changed : 7/1/2022 4:41:13 AM  
 (modified after loading)  
 Sample Info : OD-H, Hexane/i-PrOH = 95/5, 1.0 mL/min, 30 oC, 254 nm

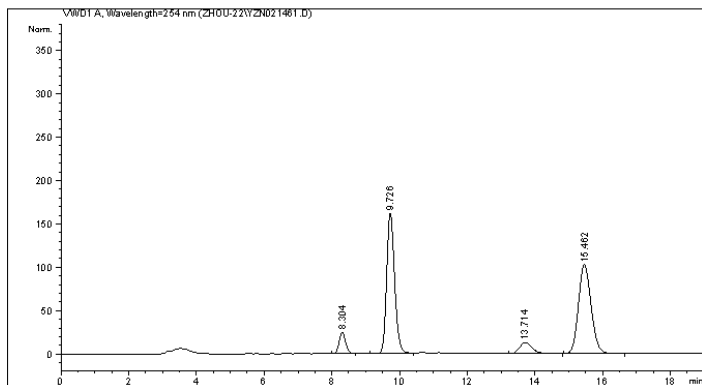

=====  
 Area Percent Report  
 =====

Sorted By : Signal  
 Multiplier: : 1.0000  
 Dilution: : 1.0000  
 Use Multiplier & Dilution Factor with ISTDs

Signal 1: VWD1 A, Wavelength=254 nm

| Peak # | RetTime [min] | Type | Width [min] | Area [mAU] | Height [mAU] | Area %  |
|--------|---------------|------|-------------|------------|--------------|---------|
| 1      | 8.304         | BV   | 0.2048      | 332.16351  | 24.95156     | 5.5432  |
| 2      | 9.726         | VV   | 0.2535      | 2674.45972 | 162.17827    | 44.6315 |
| 3      | 13.714        | BB   | 0.3957      | 333.42480  | 12.85673     | 5.5642  |
| 4      | 15.462        | BB   | 0.4010      | 2652.26978 | 102.46486    | 44.2612 |

Totals : 5992.31781 302.45142

=====  
 \*\*\* End of Report \*\*\*

Instrument 1 7/1/2022 4:41:54 AM

Page 1 of 1

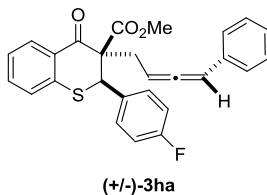

Data File C:\CHEM32\1\DATA\ZHOU-22\YZN021460.D  
 Sample Name: LL-10-25A

=====  
 Acq. Operator :  
 Acq. Instrument : Instrument 1 Location : -  
 Injection Date : 6/30/2022 8:49:54 PM  
 Acq. Method : C:\CHEM32\1\METHODS\DEF\_LC.M  
 Last changed : 6/30/2022 7:50:37 PM  
 (modified after loading)  
 Analysis Method : C:\CHEM32\1\METHODS\DEF\_LC.M  
 Last changed : 7/1/2022 4:41:13 AM  
 (modified after loading)  
 Sample Info : OD-H, Hexane/i-PrOH = 95/5, 1.0 mL/min, 30 oC, 254 nm

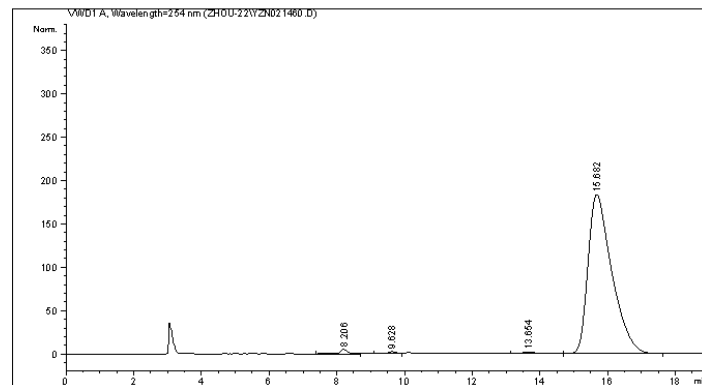

=====  
 Area Percent Report  
 =====

Sorted By : Signal  
 Multiplier: : 1.0000  
 Dilution: : 1.0000  
 Use Multiplier & Dilution Factor with ISTDs

Signal 1: VWD1 A, Wavelength=254 nm

| Peak # | RetTime [min] | Type | Width [min] | Area [mAU] | Height [mAU] | Area %  |
|--------|---------------|------|-------------|------------|--------------|---------|
| 1      | 8.206         | BB   | 0.2224      | 74.65000   | 5.03600      | 0.8207  |
| 2      | 9.628         | BV   | 0.2763      | 42.77714   | 2.35195      | 0.4703  |
| 3      | 13.654        | BV   | 0.4673      | 52.19173   | 1.65324      | 0.5738  |
| 4      | 15.682        | VB   | 0.7245      | 8926.16309 | 183.59103    | 98.1352 |

Totals : 9095.78195 192.63221

=====  
 \*\*\* End of Report \*\*\*

Instrument 1 7/1/2022 4:41:24 AM

Page 1 of 1

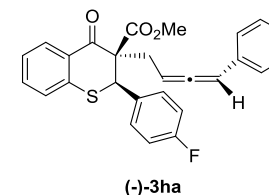

Data File C:\CHEM32\1\DATA\ZHOU-22\YZN021463.D  
 Sample Name: LL-10-25B +/-

=====  
 Acq. Operator :  
 Acq. Instrument : Instrument 1 Location : -  
 Injection Date : 6/30/2022 10:00:41 PM  
 Acq. Method : C:\CHEM32\1\METHODS\DEF\_LC.M  
 Last changed : 6/30/2022 9:58:43 PM  
 (modified after loading)  
 Analysis Method : C:\CHEM32\1\METHODS\DEF\_LC.M  
 Last changed : 7/1/2022 4:46:27 AM  
 (modified after loading)  
 Sample Info : OD-H, Hexane/i-PrOH = 95/5, 1.0 mL/min, 30 oC, 254 nm

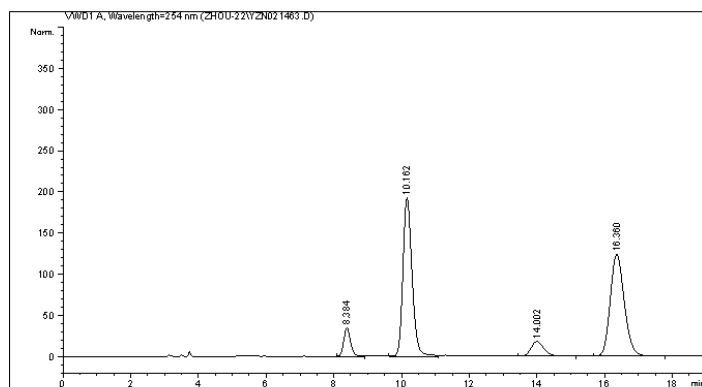

=====  
 Area Percent Report  
 =====

Sorted By : Signal  
 Multiplier: : 1.0000  
 Dilution: : 1.0000  
 Use Multiplier & Dilution Factor with ISTDs

Signal 1: VWD1 A, Wavelength=254 nm

| Peak # | RetTime [min] | Type | Width [min] | Area [mAU*s] | Height [mAU] | Area %  |
|--------|---------------|------|-------------|--------------|--------------|---------|
| 1      | 8.384         | BV   | 0.2152      | 482.19040    | 34.56851     | 5.9241  |
| 2      | 10.162        | VV   | 0.2885      | 3604.76440   | 192.39569    | 44.2875 |
| 3      | 14.002        | EB   | 0.4158      | 484.23416    | 17.99613     | 5.9492  |
| 4      | 16.360        | BB   | 0.4444      | 3568.27002   | 123.64312    | 43.8392 |

Totals : 8139.45898 368.60345

=====  
 \*\*\* End of Report \*\*\*

Instrument 1 7/1/2022 4:46:30 AM

Page 1 of 1

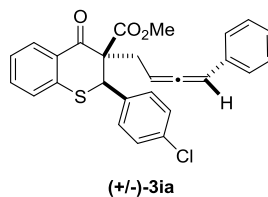

Data File C:\CHEM32\1\DATA\ZHOU-22\YZN021462.D  
 Sample Name: LL-10-25B

=====  
 Acq. Operator :  
 Acq. Instrument : Instrument 1 Location : -  
 Injection Date : 6/30/2022 9:38:03 PM  
 Acq. Method : C:\CHEM32\1\METHODS\DEF\_LC.M  
 Last changed : 6/30/2022 9:33:48 PM  
 (modified after loading)  
 Analysis Method : C:\CHEM32\1\METHODS\DEF\_LC.M  
 Last changed : 7/1/2022 4:46:02 AM  
 (modified after loading)  
 Sample Info : OD-H, Hexane/i-PrOH = 95/5, 1.0 mL/min, 30 oC, 254 nm

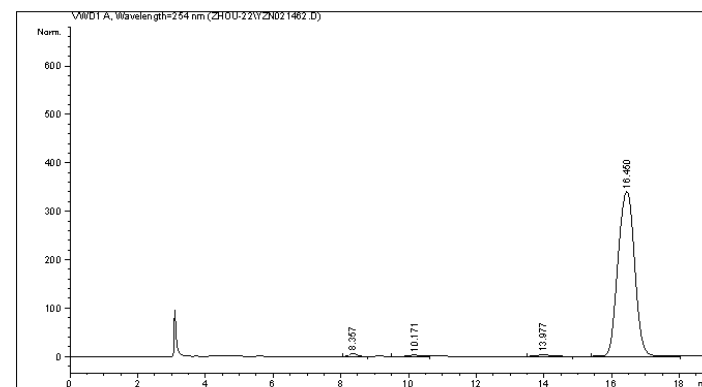

=====  
 Area Percent Report  
 =====

Sorted By : Signal  
 Multiplier: : 1.0000  
 Dilution: : 1.0000  
 Use Multiplier & Dilution Factor with ISTDs

Signal 1: VWD1 A, Wavelength=254 nm

| Peak # | RetTime [min] | Type | Width [min] | Area [mAU*s] | Height [mAU] | Area %  |
|--------|---------------|------|-------------|--------------|--------------|---------|
| 1      | 8.357         | BV   | 0.2143      | 91.02782     | 6.55875      | 0.7722  |
| 2      | 10.171        | VV   | 0.3167      | 58.77496     | 2.77823      | 0.4986  |
| 3      | 13.977        | EB   | 0.4041      | 86.74761     | 3.28612      | 0.7359  |
| 4      | 16.450        | BB   | 0.5535      | 1.15518e4    | 340.12857    | 97.9934 |

Totals : 1.17884e4 352.75168

=====  
 \*\*\* End of Report \*\*\*

Instrument 1 7/1/2022 4:46:06 AM

Page 1 of 1

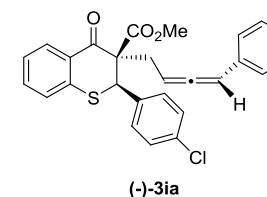

Data File C:\CHEM32\1\DATA\ZHOU-22\YZN021465.D  
 Sample Name: LL-10-25C +/-

=====  
 Acq. Operator :  
 Acq. Instrument : Instrument 1 Location : -  
 Injection Date : 6/30/2022 10:53:03 PM  
 Acq. Method : C:\CHEM32\1\METHODS\DEF\_LC.M  
 Last changed : 6/30/2022 10:51:05 PM  
 (modified after loading)  
 Analysis Method : C:\CHEM32\1\METHODS\DEF\_LC.M  
 Last changed : 7/1/2022 4:50:40 AM  
 (modified after loading)  
 Sample Info : OD-H, Hexane/i-PrOH = 95/5, 1.0 mL/min, 30 oC, 254 nm

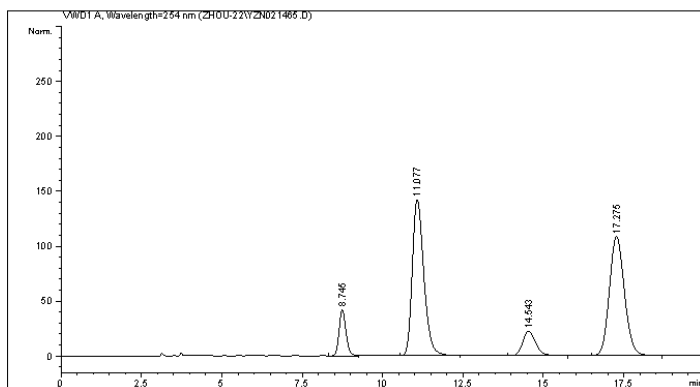

=====  
 Area Percent Report  
 =====

Sorted By : Signal  
 Multiplier: : 1.0000  
 Dilution: : 1.0000  
 Use Multiplier & Dilution Factor with ISTDs

Signal 1: VWD1 A, Wavelength=254 nm

| Peak # | RetTime [min] | Type | Width [min] | Area [mAU] | Height [mAU] | Area %  |
|--------|---------------|------|-------------|------------|--------------|---------|
| 1      | 8.745         | VV   | 0.2287      | 625.18262  | 42.06327     | 7.5051  |
| 2      | 11.077        | VB   | 0.3851      | 3562.41309 | 142.35739    | 42.7654 |
| 3      | 14.543        | VB   | 0.4303      | 623.19031  | 22.33843     | 7.4812  |
| 4      | 17.275        | BB   | 0.5038      | 3519.34717 | 108.44839    | 42.2484 |

Totals : 8330.13318 315.20749

=====  
 \*\*\* End of Report \*\*\*

Instrument 1 7/1/2022 4:51:05 AM

Page 1 of 1

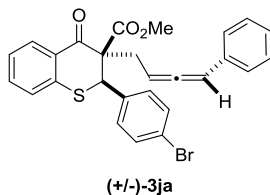

Data File C:\CHEM32\1\DATA\ZHOU-22\YZN021464.D  
 Sample Name: LL-10-25C

=====  
 Acq. Operator :  
 Acq. Instrument : Instrument 1 Location : -  
 Injection Date : 6/30/2022 10:29:22 PM  
 Acq. Method : C:\CHEM32\1\METHODS\DEF\_LC.M  
 Last changed : 6/30/2022 10:23:14 PM  
 (modified after loading)  
 Analysis Method : C:\CHEM32\1\METHODS\DEF\_LC.M  
 Last changed : 7/1/2022 4:50:40 AM  
 (modified after loading)  
 Sample Info : OD-H, Hexane/i-PrOH = 95/5, 1.0 mL/min, 30 oC, 254 nm

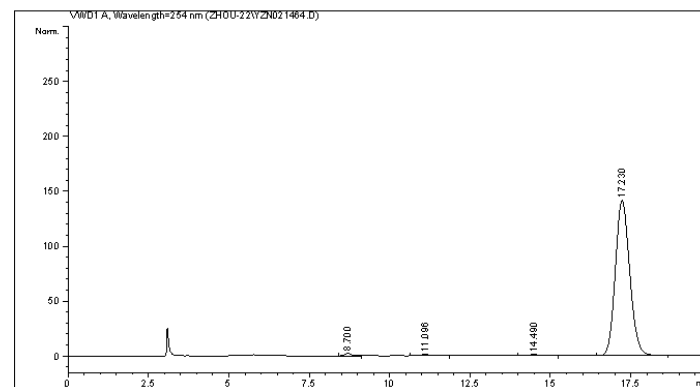

=====  
 Area Percent Report  
 =====

Sorted By : Signal  
 Multiplier: : 1.0000  
 Dilution: : 1.0000  
 Use Multiplier & Dilution Factor with ISTDs

Signal 1: VWD1 A, Wavelength=254 nm

| Peak # | RetTime [min] | Type | Width [min] | Area [mAU] | Height [mAU] | Area %  |
|--------|---------------|------|-------------|------------|--------------|---------|
| 1      | 8.700         | BB   | 0.2285      | 32.55314   | 2.19361      | 0.7245  |
| 2      | 11.096        | BB   | 0.3843      | 27.47681   | 1.09014      | 0.6115  |
| 3      | 14.490        | BB   | 0.4159      | 29.13189   | 1.04390      | 0.6483  |
| 4      | 17.230        | BB   | 0.4828      | 4404.18799 | 141.39259    | 98.0157 |

Totals : 4493.34983 145.72023

=====  
 \*\*\* End of Report \*\*\*

Instrument 1 7/1/2022 4:50:46 AM

Page 1 of 1

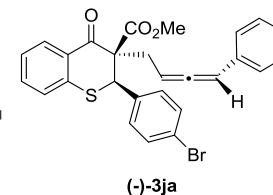

Data File C:\CHEM32\1\DATA\ZHOU-22\YZN021508.D  
 Sample Name: LL-10-41A +/-

=====  
 Acq. Operator :  
 Acq. Instrument : Instrument 1 Location : -  
 Injection Date : 7/12/2022 9:34:30 PM  
 Acq. Method : C:\CHEM32\1\METHODS\DEF\_LC.M  
 Last changed : 7/12/2022 9:33:12 PM  
 (modified after loading)  
 Analysis Method : C:\CHEM32\1\METHODS\DEF\_LC.M  
 Last changed : 7/13/2022 9:54:45 AM  
 (modified after loading)  
 Sample Info : OD-H, Hexane/i-PrOH = 94/6, 1.0 mL/min, 30 oC, 254 nm

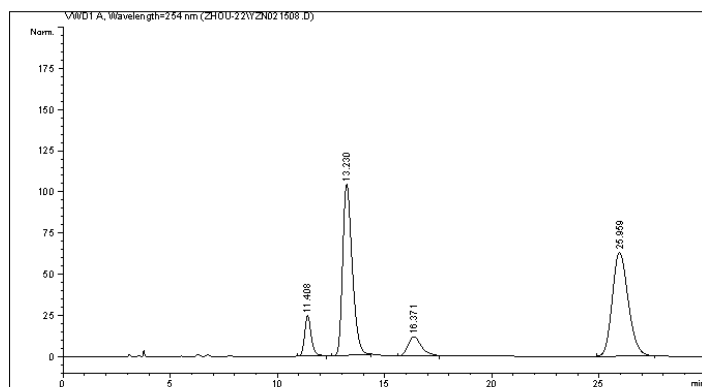

=====  
 Area Percent Report  
 =====

Sorted By : Signal  
 Multiplier: : 1.0000  
 Dilution: : 1.0000  
 Use Multiplier & Dilution Factor with ISTDs

Signal 1: WVD1 A, Wavelength=254 nm

| Peak # | RetTime [min] | Type | Width [min] | Area [mAU*s] | Height [mAU] | Area %  |
|--------|---------------|------|-------------|--------------|--------------|---------|
| 1      | 11.408        | BB   | 0.3305      | 528.32330    | 24.47416     | 7.0115  |
| 2      | 13.230        | BB   | 0.4760      | 3226.41968   | 103.85638    | 42.8184 |
| 3      | 16.371        | BB   | 0.6728      | 510.24002    | 11.64561     | 6.7715  |
| 4      | 25.959        | BB   | 0.8072      | 3270.14917   | 63.07744     | 43.3987 |

Totals : 7535.13217 203.05359

=====  
 \*\*\* End of Report \*\*\*

Instrument 1 7/13/2022 9:54:47 AM

Page 1 of 1

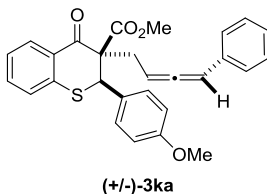

Data File C:\CHEM32\1\DATA\ZHOU-22\YZN021507.D  
 Sample Name: LL-10-41A

=====  
 Acq. Operator :  
 Acq. Instrument : Instrument 1 Location : -  
 Injection Date : 7/12/2022 9:00:46 PM  
 Acq. Method : C:\CHEM32\1\METHODS\DEF\_LC.M  
 Last changed : 7/12/2022 8:48:05 PM  
 (modified after loading)  
 Analysis Method : C:\CHEM32\1\METHODS\DEF\_LC.M  
 Last changed : 7/12/2022 10:01:46 PM  
 (modified after loading)  
 Sample Info : OD-H, Hexane/i-PrOH = 94/6, 1.0 mL/min, 30 oC, 254 nm

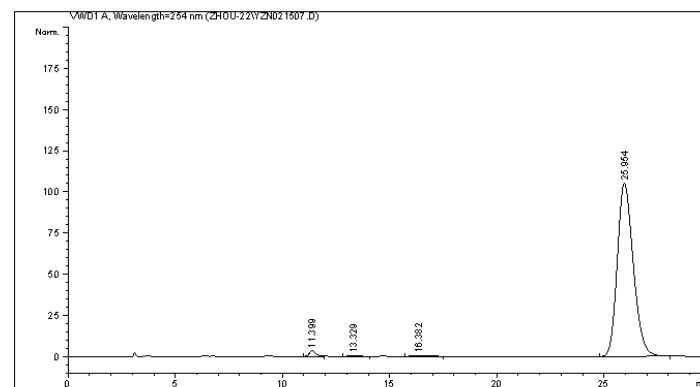

=====  
 Area Percent Report  
 =====

Sorted By : Signal  
 Multiplier: : 1.0000  
 Dilution: : 1.0000  
 Use Multiplier & Dilution Factor with ISTDs

Signal 1: WVD1 A, Wavelength=254 nm

| Peak # | RetTime [min] | Type | Width [min] | Area [mAU*s] | Height [mAU] | Area %  |
|--------|---------------|------|-------------|--------------|--------------|---------|
| 1      | 11.399        | BB   | 0.3295      | 71.07248     | 3.38412      | 1.2782  |
| 2      | 13.329        | BB   | 0.4364      | 16.56297     | 5.33641e-1   | 0.2979  |
| 3      | 16.382        | BB   | 0.6242      | 31.66577     | 6.64726e-1   | 0.5695  |
| 4      | 25.954        | BB   | 0.8004      | 5441.19580   | 105.13624    | 97.8545 |

Totals : 5560.49702 109.71872

=====  
 \*\*\* End of Report \*\*\*

Instrument 1 7/12/2022 10:01:49 PM

Page 1 of 1

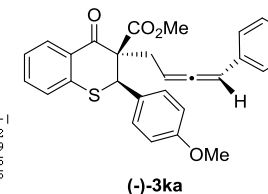

Data File C:\CHEM32\1\DATA\ZHOU-22\YZN021580.D  
 Sample Name: LL-10-53D +/-

=====  
 Acq. Operator :  
 Acq. Instrument : Instrument 1 Location : -  
 Injection Date : 7/27/2022 8:40:40 AM  
 Acq. Method : C:\CHEM32\1\METHODS\DEF\_LC.M  
 Last changed : 7/27/2022 8:37:30 AM  
 (modified after loading)  
 Analysis Method : C:\CHEM32\1\METHODS\DEF\_LC.M  
 Last changed : 7/27/2022 9:14:13 AM  
 (modified after loading)  
 Sample Info : IC, Hexane/i-PrOH = 99/1, 1.0 mL/min, 30 oC, 254 nm

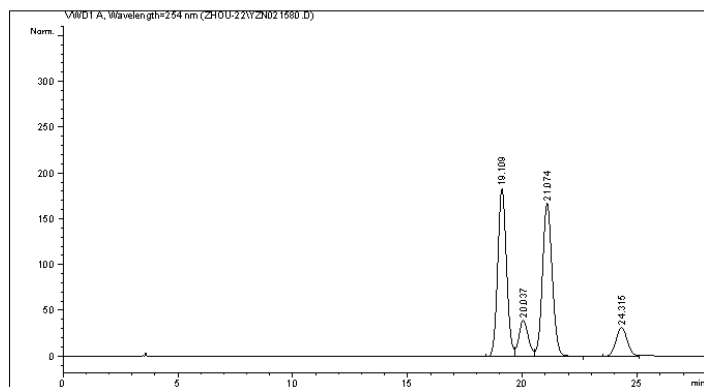

=====  
 Area Percent Report  
 =====

Sorted By : Signal  
 Multiplier: : 1.0000  
 Dilution: : 1.0000  
 Use Multiplier & Dilution Factor with ISTDs

Signal 1: VWD1 A, Wavelength=254 nm

| Peak # | RetTime [min] | Type | Width [min] | Area [mAU] | Height [mAU] | Area %  |
|--------|---------------|------|-------------|------------|--------------|---------|
| 1      | 19.109        | BV   | 0.4115      | 4856.06885 | 183.02740    | 40.6086 |
| 2      | 20.037        | VV   | 0.4314      | 1103.95667 | 39.26189     | 9.2318  |
| 3      | 21.074        | VB   | 0.4557      | 4915.48437 | 166.89432    | 41.1054 |
| 4      | 24.315        | BV   | 0.5321      | 1082.72046 | 31.49474     | 9.0542  |

Totals : 1.19582e4 420.67836

=====  
 \*\*\* End of Report \*\*\*

Instrument 1 7/27/2022 9:14:58 AM

Page 1 of 1

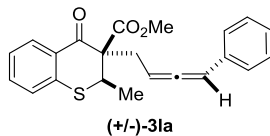

Data File C:\CHEM32\1\DATA\ZHOU-22\YZN021576.D  
 Sample Name: LL-10-53D

=====  
 Acq. Operator :  
 Acq. Instrument : Instrument 1 Location : -  
 Injection Date : 7/26/2022 9:00:16 PM  
 Acq. Method : C:\CHEM32\1\METHODS\DEF\_LC.M  
 Last changed : 7/26/2022 8:19:57 PM  
 (modified after loading)  
 Analysis Method : C:\CHEM32\1\METHODS\DEF\_LC.M  
 Last changed : 7/27/2022 9:09:48 AM  
 (modified after loading)  
 Sample Info : IC, Hexane/i-PrOH = 99/1, 1.0 mL/min, 30 oC, 254 nm

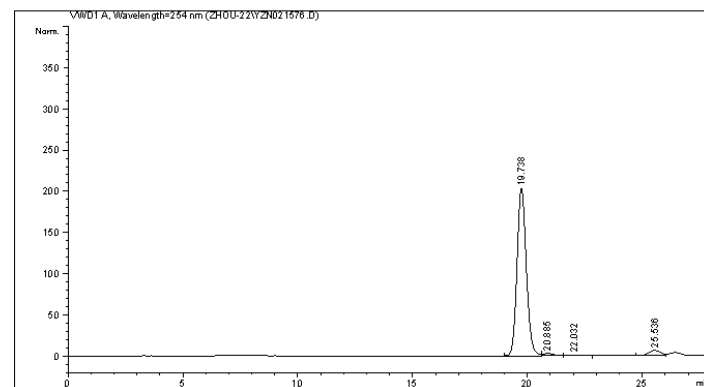

=====  
 Area Percent Report  
 =====

Sorted By : Signal  
 Multiplier: : 1.0000  
 Dilution: : 1.0000  
 Use Multiplier & Dilution Factor with ISTDs

Signal 1: VWD1 A, Wavelength=254 nm

| Peak # | RetTime [min] | Type | Width [min] | Area [mAU] | Height [mAU] | Area %  |
|--------|---------------|------|-------------|------------|--------------|---------|
| 1      | 19.738        | BV   | 0.4350      | 5717.60791 | 202.95280    | 93.9247 |
| 2      | 20.885        | VV   | 0.4792      | 92.30535   | 2.80027      | 1.5163  |
| 3      | 22.032        | VB   | 0.4718      | 29.17776   | 8.37778e-1   | 0.4793  |
| 4      | 25.536        | BV   | 0.5708      | 248.34492  | 6.65473      | 4.0796  |

Totals : 6087.43595 213.24558

=====  
 \*\*\* End of Report \*\*\*

Instrument 1 7/27/2022 9:09:58 AM

Page 1 of 1

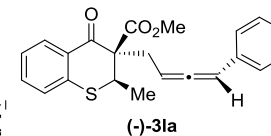

Data File C:\CHEM32\1\DATA\ZHOU-22\YZN021627.D  
 Sample Name: LL-10-63B +/-

=====  
 Acq. Operator :  
 Acq. Instrument : Instrument 1 Location : -  
 Injection Date : 8/25/2022 9:23:11 PM  
 Acq. Method : C:\CHEM32\1\METHODS\DEF\_LC.M  
 Last changed : 8/25/2022 9:21:55 PM  
 (modified after loading)  
 Analysis Method : C:\CHEM32\1\METHODS\DEF\_LC.M  
 Last changed : 8/26/2022 9:08:17 PM  
 (modified after loading)  
 Sample Info : IB, Hexane/i-PrOH = 85/15, 1.0 mL/min, 30 oC, 254 nm

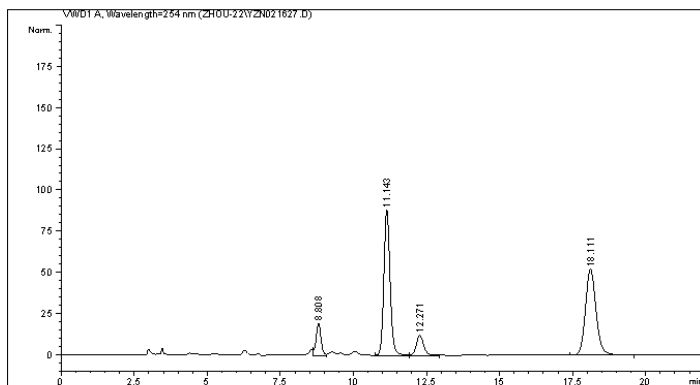

=====  
 Area Percent Report  
 =====

Sorted By : Signal  
 Multiplier: : 1.0000  
 Dilution: : 1.0000  
 Use Multiplier & Dilution Factor with ISTDs

Signal 1: WVD1 A, Wavelength=254 nm

| Peak # | RetTime [min] | Type | Width [min] | Area [mAU] | Height [mAU] | Area %  |
|--------|---------------|------|-------------|------------|--------------|---------|
| 1      | 8.808         | VV   | 0.1801      | 232.57033  | 19.67810     | 7.5886  |
| 2      | 11.143        | BV   | 0.2279      | 1303.60742 | 88.15347     | 42.5358 |
| 3      | 12.271        | VB   | 0.2674      | 212.96240  | 12.21845     | 6.9488  |
| 4      | 18.111        | VB   | 0.3880      | 1315.58972 | 52.06441     | 42.9268 |

Totals : 3064.72987 172.11444

=====  
 \*\*\* End of Report \*\*\*

Instrument 1 8/26/2022 9:08:21 PM

Page 1 of 1

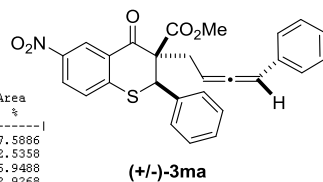

Data File C:\CHEM32\1\DATA\ZHOU-22\YZN021628.D  
 Sample Name: LL-10-63B

=====  
 Acq. Operator :  
 Acq. Instrument : Instrument 1 Location : -  
 Injection Date : 8/25/2022 9:48:11 PM  
 Acq. Method : C:\CHEM32\1\METHODS\DEF\_LC.M  
 Last changed : 8/25/2022 9:46:45 PM  
 (modified after loading)  
 Analysis Method : C:\CHEM32\1\METHODS\DEF\_LC.M  
 Last changed : 8/26/2022 8:57:54 PM  
 (modified after loading)  
 Sample Info : IB, Hexane/i-PrOH = 85/15, 1.0 mL/min, 30 oC, 254 nm

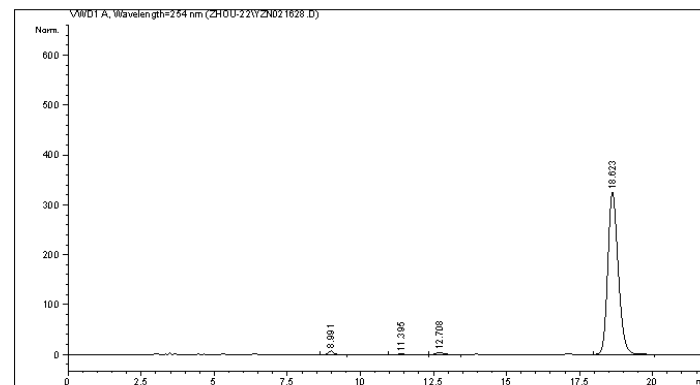

=====  
 Area Percent Report  
 =====

Sorted By : Signal  
 Multiplier: : 1.0000  
 Dilution: : 1.0000  
 Use Multiplier & Dilution Factor with ISTDs

Signal 1: WVD1 A, Wavelength=254 nm

| Peak # | RetTime [min] | Type | Width [min] | Area [mAU] | Height [mAU] | Area %  |
|--------|---------------|------|-------------|------------|--------------|---------|
| 1      | 8.891         | BV   | 0.1997      | 93.60039   | 6.99972      | 1.1347  |
| 2      | 11.395        | VB   | 0.3694      | 24.92332   | 9.25774e-1   | 0.3021  |
| 3      | 12.708        | BB   | 0.2929      | 83.31068   | 4.24815      | 1.0100  |
| 4      | 18.623        | BB   | 0.3821      | 8047.06543 | 324.92776    | 97.5532 |

Totals : 8248.89981 337.10141

=====  
 \*\*\* End of Report \*\*\*

Instrument 1 8/26/2022 8:58:03 PM

Page 1 of 1

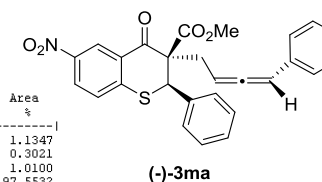

Data File C:\CHEM32\1\DATA\ZHOU-22\YZN021616.D  
 Sample Name: LL-10-63C +/-

=====  
 Acq. Operator :  
 Acq. Instrument : Instrument 1 Location : -  
 Injection Date : 8/23/2022 2:03:58 AM  
 Acq. Method : C:\CHEM32\1\METHODS\DEF\_LC.M  
 Last changed : 8/23/2022 1:49:44 AM  
 (modified after loading)  
 Analysis Method : C:\CHEM32\1\METHODS\DEF\_LC.M  
 Last changed : 8/26/2022 9:41:43 PM  
 (modified after loading)  
 Sample Info : AD-3, Hexane/i-PrOH = 90/10, 0.8 mL/min, 30 oC, 254 nm

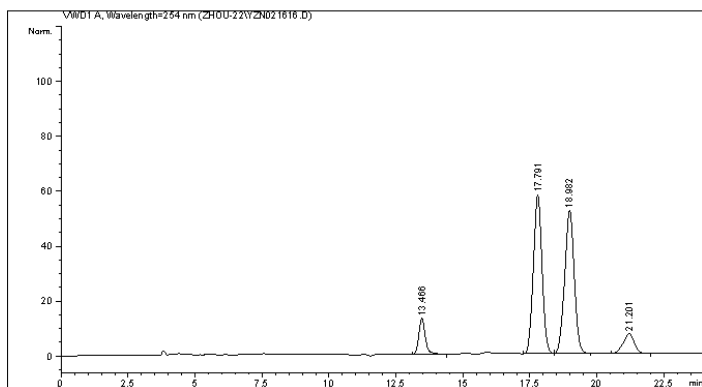

=====  
 Area Percent Report  
 =====

Sorted By : Signal  
 Multiplier: : 1.0000  
 Dilution: : 1.0000  
 Use Multiplier & Dilution Factor with ISTDs

Signal 1: VWD1 A, Wavelength=254 nm

| Peak # | RetTime [min] | Type | Width [min] | Area [mAU] | Height [mAU] | Area %  |
|--------|---------------|------|-------------|------------|--------------|---------|
| 1      | 13.466        | BB   | 0.2546      | 218.44931  | 13.07639     | 7.2224  |
| 2      | 17.791        | BV   | 0.3474      | 1303.31104 | 57.82098     | 43.0903 |
| 3      | 18.982        | VB   | 0.3782      | 1296.90649 | 52.01914     | 42.8785 |
| 4      | 21.201        | BB   | 0.4330      | 205.93846  | 7.19370      | 6.8088  |

Totals : 3024.60530 130.11022

=====  
 \*\*\* End of Report \*\*\*

Instrument 1 8/26/2022 9:41:47 PM

Page 1 of 1

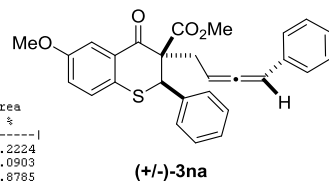

Data File C:\CHEM32\1\DATA\ZHOU-22\YZN021631.D  
 Sample Name: LL-10-63C

=====  
 Acq. Operator :  
 Acq. Instrument : Instrument 1 Location : -  
 Injection Date : 8/25/2022 11:33:14 PM  
 Acq. Method : C:\CHEM32\1\METHODS\DEF\_LC.M  
 Last changed : 8/25/2022 11:26:21 PM  
 (modified after loading)  
 Analysis Method : C:\CHEM32\1\METHODS\DEF\_LC.M  
 Last changed : 8/26/2022 9:38:23 PM  
 (modified after loading)  
 Sample Info : AD-3, Hexane/i-PrOH = 90/10, 0.8 mL/min, 30 oC, 254 nm

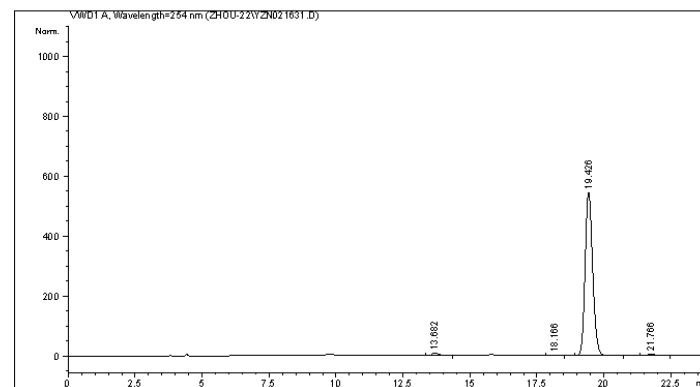

=====  
 Area Percent Report  
 =====

Sorted By : Signal  
 Multiplier: : 1.0000  
 Dilution: : 1.0000  
 Use Multiplier & Dilution Factor with ISTDs

Signal 1: VWD1 A, Wavelength=254 nm

| Peak # | RetTime [min] | Type | Width [min] | Area [mAU] | Height [mAU] | Area %  |
|--------|---------------|------|-------------|------------|--------------|---------|
| 1      | 13.682        | VB   | 0.2632      | 175.35739  | 9.63931      | 1.5972  |
| 2      | 18.166        | VV   | 0.2730      | 39.70545   | 2.24793      | 0.3616  |
| 3      | 19.426        | VB   | 0.3034      | 1.06550e4  | 545.97540    | 97.0484 |
| 4      | 21.766        | VB   | 0.3436      | 108.99452  | 4.90750      | 0.9928  |

Totals : 1.09790e4 562.77014

=====  
 \*\*\* End of Report \*\*\*

Instrument 1 8/26/2022 9:39:49 PM

Page 1 of 1

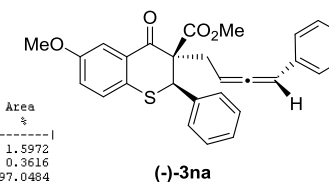

Data File C:\CHEM32\1\DATA\ZHOU-22\YZN021731.D  
 Sample Name: LL-10-74C +/-

=====  
 Acq. Operator :  
 Acq. Instrument : Instrument 1 Location : -  
 Injection Date : 9/29/2022 10:31:50 PM  
 Acq. Method : C:\CHEM32\1\METHODS\DEF\_LC.M  
 Last changed : 9/29/2022 10:28:25 PM  
 (modified after loading)  
 Analysis Method : C:\CHEM32\1\METHODS\DEF\_LC.M  
 Last changed : 9/29/2022 11:26:15 PM  
 (modified after loading)  
 Sample Info : AD-H, Hexane/i-PrOH = 96/4, 1.0 mL/min, 30 oC, 254 nm

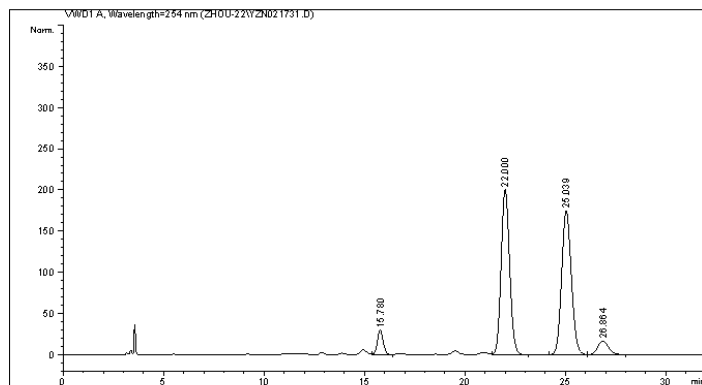

=====  
 Area Percent Report  
 =====

Sorted By : Signal  
 Multiplier: : 1.0000  
 Dilution: : 1.0000  
 Use Multiplier & Dilution Factor with ISTDs

Signal 1: WVD1 A, Wavelength=254 nm

| Peak # | RetTime [min] | Type | Width [min] | Area [mAU] | Height [mAU] | Area %  |
|--------|---------------|------|-------------|------------|--------------|---------|
| 1      | 15.780        | VV   | 0.3096      | 589.07922  | 29.38743     | 4.5452  |
| 2      | 22.000        | VB   | 0.4587      | 5877.99072 | 200.36493    | 45.3529 |
| 3      | 25.039        | VV   | 0.5261      | 5875.54785 | 174.82314    | 45.3341 |
| 4      | 26.864        | VB   | 0.5741      | 617.93982  | 16.59704     | 4.7678  |

Totals : 1.29606e4 421.17253

=====  
 \*\*\* End of Report \*\*\*

Instrument 1 9/29/2022 11:26:17 PM

Page 1 of 1

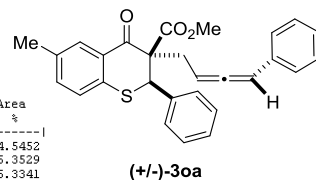

Data File C:\CHEM32\1\DATA\ZHOU-22\YZN021730.D  
 Sample Name: LL-10-74C

=====  
 Acq. Operator :  
 Acq. Instrument : Instrument 1 Location : -  
 Injection Date : 9/29/2022 9:50:45 PM  
 Acq. Method : C:\CHEM32\1\METHODS\DEF\_LC.M  
 Last changed : 9/29/2022 9:29:36 PM  
 (modified after loading)  
 Analysis Method : C:\CHEM32\1\METHODS\DEF\_LC.M  
 Last changed : 9/29/2022 11:26:47 PM  
 (modified after loading)  
 Sample Info : AD-H, Hexane/i-PrOH = 96/4, 1.0 mL/min, 30 oC, 254 nm

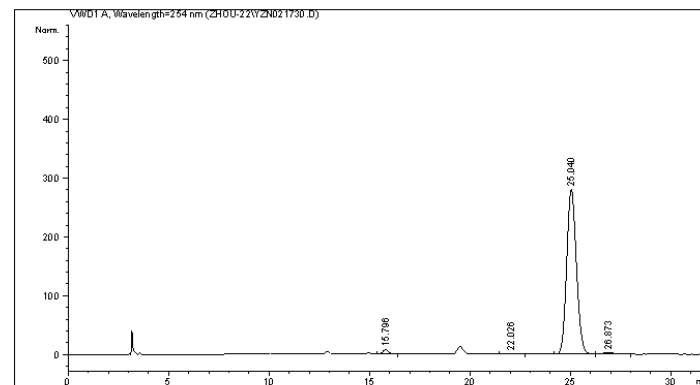

=====  
 Area Percent Report  
 =====

Sorted By : Signal  
 Multiplier: : 1.0000  
 Dilution: : 1.0000  
 Use Multiplier & Dilution Factor with ISTDs

Signal 1: WVD1 A, Wavelength=254 nm

| Peak # | RetTime [min] | Type | Width [min] | Area [mAU] | Height [mAU] | Area %  |
|--------|---------------|------|-------------|------------|--------------|---------|
| 1      | 15.796        | VB   | 0.3152      | 159.12651  | 7.84813      | 1.6381  |
| 2      | 22.026        | BB   | 0.4457      | 26.53791   | 9.16074e-1   | 0.2732  |
| 3      | 25.040        | EV   | 0.5227      | 9408.33594 | 280.25143    | 96.8517 |
| 4      | 26.873        | VB   | 0.5841      | 120.17010  | 3.15510      | 1.2371  |

Totals : 9714.17046 292.17074

=====  
 \*\*\* End of Report \*\*\*

Instrument 1 9/29/2022 11:28:52 PM

Page 1 of 1

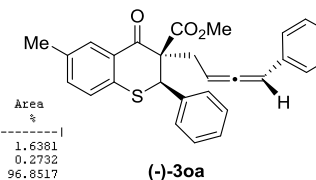



Data File C:\CHEM32\1\DATA\ZHOU-22\YZN021737.D  
 Sample Name: LL-10-74D +/-

=====  
 Acq. Operator :  
 Acq. Instrument : Instrument 1 Location : -  
 Injection Date : 9/30/2022 4:09:33 AM  
 Acq. Method : C:\CHEM32\1\METHODS\DEF\_LC.M  
 Last changed : 9/30/2022 3:22:41 AM  
 (modified after loading)  
 Analysis Method : C:\CHEM32\1\METHODS\DEF\_LC.M  
 Last changed : 9/30/2022 10:30:07 AM  
 (modified after loading)  
 Sample Info : AD-3, Hexane/i-PrOH = 96/4, 0.8 mL/min, 30 oC, 254 nm

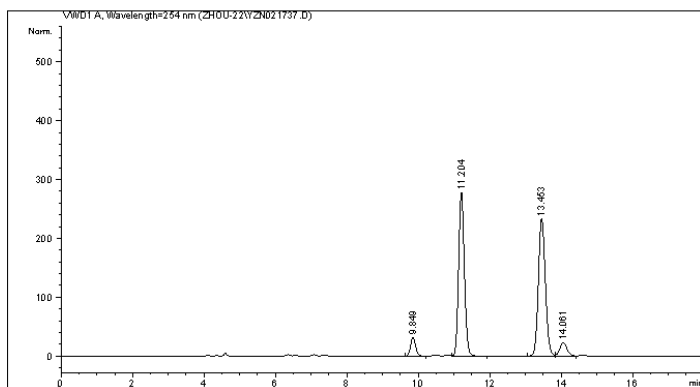

=====  
 Area Percent Report  
 =====

Sorted By : Signal  
 Multiplier: : 1.0000  
 Dilution: : 1.0000  
 Use Multiplier & Dilution Factor with ISTDs

Signal 1: VWD1 A, Wavelength=254 nm

| Peak # | RetTime [min] | Type | Width [min] | Area [mAU] | Height [mAU] | Area %  |
|--------|---------------|------|-------------|------------|--------------|---------|
| 1      | 9.849         | EV   | 0.1524      | 313.24661  | 31.90422     | 4.5283  |
| 2      | 11.204        | VB   | 0.1747      | 3124.62256 | 278.28778    | 45.1701 |
| 3      | 13.453        | EV   | 0.2107      | 3161.98291 | 233.03334    | 45.7102 |
| 4      | 14.061        | VV   | 0.2167      | 317.61075  | 22.55185     | 4.5914  |

Totals : 6917.46283 565.77719

=====  
 \*\*\* End of Report \*\*\*

Instrument 1 9/30/2022 10:30:10 AM

Page 1 of 1

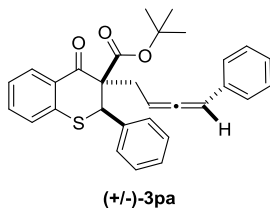

Data File C:\CHEM32\1\DATA\ZHOU-22\YZN021738.D  
 Sample Name: LL-10-74D

=====  
 Acq. Operator :  
 Acq. Instrument : Instrument 1 Location : -  
 Injection Date : 9/30/2022 4:36:43 AM  
 Acq. Method : C:\CHEM32\1\METHODS\DEF\_LC.M  
 Last changed : 9/30/2022 4:35:06 AM  
 (modified after loading)  
 Analysis Method : C:\CHEM32\1\METHODS\DEF\_LC.M  
 Last changed : 9/30/2022 10:31:58 AM  
 (modified after loading)  
 Sample Info : AD-3, Hexane/i-PrOH = 96/4, 0.8 mL/min, 30 oC, 254 nm

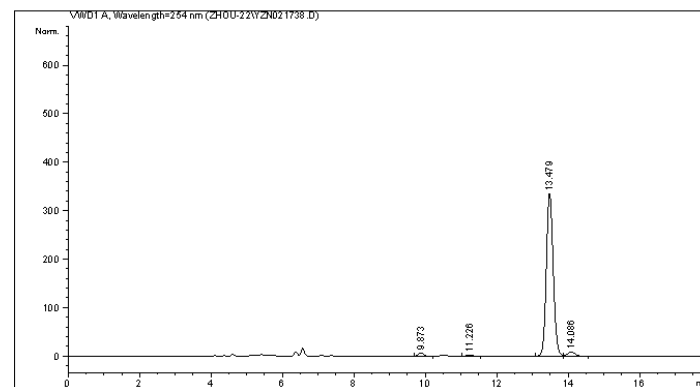

=====  
 Area Percent Report  
 =====

Sorted By : Signal  
 Multiplier: : 1.0000  
 Dilution: : 1.0000  
 Use Multiplier & Dilution Factor with ISTDs

Signal 1: VWD1 A, Wavelength=254 nm

| Peak # | RetTime [min] | Type | Width [min] | Area [mAU] | Height [mAU] | Area %  |
|--------|---------------|------|-------------|------------|--------------|---------|
| 1      | 9.873         | EB   | 0.1520      | 64.97693   | 6.64180      | 1.3830  |
| 2      | 11.226        | BB   | 0.1724      | 23.62246   | 2.14162      | 0.5028  |
| 3      | 13.479        | EV   | 0.2086      | 4488.53320 | 335.39087    | 95.5353 |
| 4      | 14.086        | VB   | 0.2211      | 121.16512  | 8.52858      | 2.5789  |

Totals : 4698.29771 352.70287

=====  
 \*\*\* End of Report \*\*\*

Instrument 1 9/30/2022 10:32:01 AM

Page 1 of 1

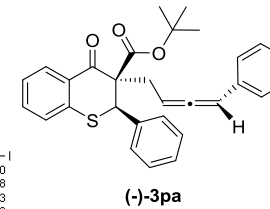

Data File C:\CHEM32\1\DATA\ZHOU-22\YZN022844.D  
 Sample Name: LL-12-24 +/-

=====  
 Acq. Operator :  
 Acq. Instrument : Instrument 1 Location : -  
 Injection Date : 4/7/2023 7:29:20 AM  
 Acq. Method : C:\CHEM32\1\METHODS\DEF\_LC.M  
 Last changed : 4/7/2023 7:13:23 AM  
 (modified after loading)  
 Analysis Method : C:\CHEM32\1\METHODS\DEF\_LC.M  
 Last changed : 4/7/2023 8:39:19 AM  
 (modified after loading)  
 Sample Info : AD-H, Hexane/1-PrOH = 93/7, 1.0 mL/min, 30 oC, 254 nm

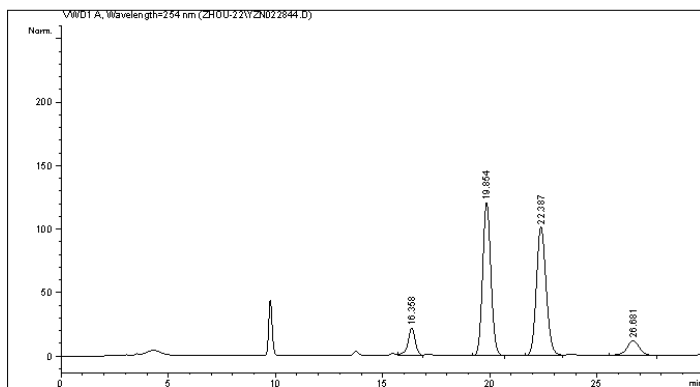

=====  
 Area Percent Report  
 =====

Sorted By : Signal  
 Multiplier: : 1.0000  
 Dilution: : 1.0000  
 Use Multiplier & Dilution Factor with ISTDs

Signal 1: WVD1 A, Wavelength=254 nm

| Peak # | RetTime [min] | Type | Width [min] | Area [mAU*s] | Height [mAU] | Area %  |
|--------|---------------|------|-------------|--------------|--------------|---------|
| 1      | 16.358        | VV   | 0.3672      | 524.67554    | 21.54059     | 7.0267  |
| 2      | 19.854        | BB   | 0.4169      | 3234.56738   | 120.34997    | 43.3188 |
| 3      | 22.387        | BB   | 0.4919      | 3219.40454   | 101.22676    | 43.1157 |
| 4      | 26.681        | BB   | 0.6375      | 488.24710    | 11.68464     | 6.5388  |

Totals : 7466.89456 254.80195

=====  
 \*\*\* End of Report \*\*\*

Instrument 1 4/7/2023 8:39:24 AM

Page 1 of 1

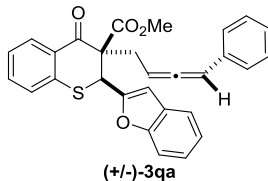

Data File C:\CHEM32\1\DATA\ZHOU-22\YZN022845.D  
 Sample Name: LL-12-24

=====  
 Acq. Operator :  
 Acq. Instrument : Instrument 1 Location : -  
 Injection Date : 4/7/2023 8:07:17 AM  
 Acq. Method : C:\CHEM32\1\METHODS\DEF\_LC.M  
 Last changed : 4/7/2023 8:05:23 AM  
 (modified after loading)  
 Analysis Method : C:\CHEM32\1\METHODS\DEF\_LC.M  
 Last changed : 4/7/2023 8:41:35 AM  
 (modified after loading)  
 Sample Info : AD-H, Hexane/1-PrOH = 93/7, 1.0 mL/min, 30 oC, 254 nm

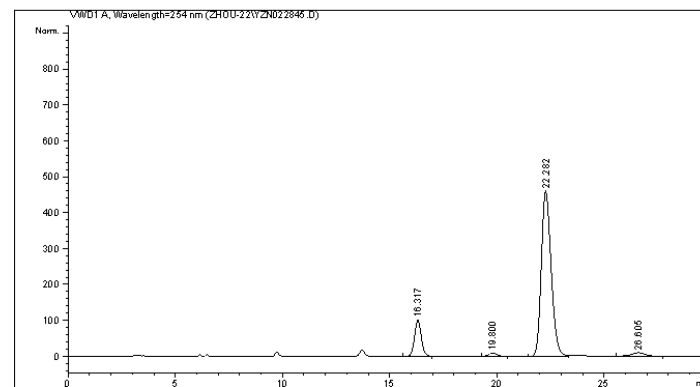

=====  
 Area Percent Report  
 =====

Sorted By : Signal  
 Multiplier: : 1.0000  
 Dilution: : 1.0000  
 Use Multiplier & Dilution Factor with ISTDs

Signal 1: WVD1 A, Wavelength=254 nm

| Peak # | RetTime [min] | Type | Width [min] | Area [mAU*s] | Height [mAU] | Area %  |
|--------|---------------|------|-------------|--------------|--------------|---------|
| 1      | 16.317        | VB   | 0.3393      | 2188.46094   | 100.18697    | 12.4988 |
| 2      | 19.800        | BB   | 0.4179      | 235.59383    | 8.78028      | 1.3455  |
| 3      | 22.282        | BB   | 0.4926      | 1.46637e4    | 460.16486    | 83.7479 |
| 4      | 26.605        | BB   | 0.6436      | 421.57547    | 9.79131      | 2.4077  |

Totals : 1.75094e4 578.92341

=====  
 \*\*\* End of Report \*\*\*

Instrument 1 4/7/2023 8:41:43 AM

Page 1 of 1

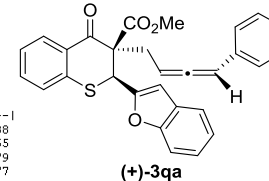

Data File D:\USERS\CHEMSTATION\1\DATA\ZHOU2022\YZ3005246 20-34-08.D  
 Sample Name: LL-10-70 D +/-

=====  
 Acq. Operator : SYSTEM  
 Sample Operator : SYSTEM  
 Acq. Instrument : 1260II Location : -  
 Injection Date : 9/29/2022 8:34:08 PM Inj : 1  
 Inj Volume : No inj  
 Acq. Method : C:\Users\Public\Documents\ChemStation\1\Methods\def\_LC.M  
 Last changed : 9/29/2022 6:41:47 PM by SYSTEM  
 (modified after loading)  
 Analysis Method : C:\Users\Public\Documents\ChemStation\1\Methods\def\_LC.M  
 Last changed : 9/29/2022 10:32:32 PM by SYSTEM  
 (modified after loading)  
 Sample Info : OD-H, n-Hexane/1-PrOH = 95/5, 1.0 mL/min, 30 oC, 254 nm

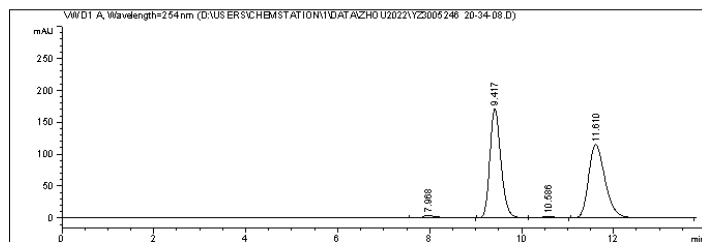

=====  
 Area Percent Report  
 =====

Sorted By : Signal  
 Multiplier : 1.0000  
 Dilution : 1.0000  
 Do not use Multiplier & Dilution Factor with ISTDs

Signal 1: VWD1 A, Wavelength=254 nm

| Peak # | RetTime [min] | Type | Width [min] | Area [mAU*s] | Height [mAU] | Area %  |
|--------|---------------|------|-------------|--------------|--------------|---------|
| 1      | 7.968         | BB   | 0.3140      | 95.62804     | 4.22667      | 1.6388  |
| 2      | 9.417         | BB   | 0.2554      | 2837.91357   | 171.22769    | 48.6328 |
| 3      | 10.586        | BB   | 0.2802      | 42.20076     | 2.32035      | 0.7232  |
| 4      | 11.610        | BB   | 0.3819      | 2859.64502   | 115.07438    | 49.0052 |

Totals : 5835.38739 292.84909

=====  
 \*\*\* End of Report \*\*\*

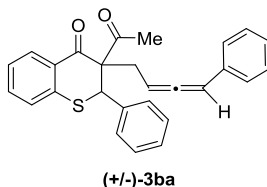

Data File D:\USERS\CHEMSTATION\1\DATA\ZHOU2022\YZ3005247 20-49-55.D  
 Sample Name: LL-10-70 D

=====  
 Acq. Operator : SYSTEM  
 Sample Operator : SYSTEM  
 Acq. Instrument : 1260II Location : -  
 Injection Date : 9/29/2022 8:49:55 PM Inj : 1  
 Inj Volume : No inj  
 Acq. Method : C:\Users\Public\Documents\ChemStation\1\Methods\def\_LC.M  
 Last changed : 9/29/2022 6:41:47 PM by SYSTEM  
 (modified after loading)  
 Analysis Method : C:\Users\Public\Documents\ChemStation\1\Methods\def\_LC.M  
 Last changed : 9/29/2022 10:34:30 PM by SYSTEM  
 (modified after loading)  
 Sample Info : OD-H, n-Hexane/1-PrOH = 95/5, 1.0 mL/min, 30 oC, 254 nm

Additional Info : Peak(s) manually integrated

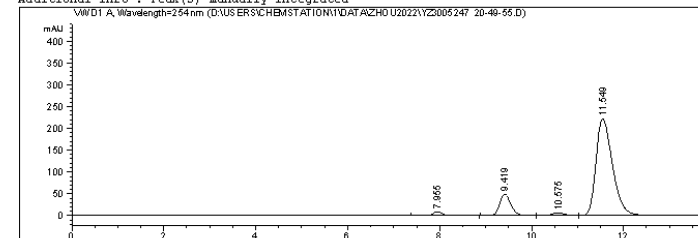

=====  
 Area Percent Report  
 =====

Sorted By : Signal  
 Multiplier : 1.0000  
 Dilution : 1.0000  
 Do not use Multiplier & Dilution Factor with ISTDs

Signal 1: VWD1 A, Wavelength=254 nm

| Peak # | RetTime [min] | Type | Width [min] | Area [mAU*s] | Height [mAU] | Area %  |
|--------|---------------|------|-------------|--------------|--------------|---------|
| 1      | 7.955         | BB   | 0.2151      | 128.63974    | 9.09024      | 1.9534  |
| 2      | 9.419         | BB   | 0.2575      | 820.85236    | 49.23763     | 12.4649 |
| 3      | 10.575        | VB   | 0.2909      | 110.45456    | 5.83479      | 1.6773  |
| 4      | 11.549        | VB   | 0.3810      | 5525.35205   | 222.30194    | 83.9043 |

Totals : 6585.29871 286.46461

=====  
 \*\*\* End of Report \*\*\*

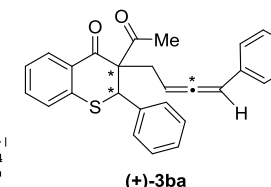

Data File C:\CHEM32\1\DATA\ZHOU-22\YZN022246.D  
 Sample Name: LL-11-55 +/-

=====  
 Acq. Operator :  
 Acq. Instrument : Instrument 1 Location : -  
 Injection Date : 12/28/2022 3:07:07 AM  
 Acq. Method : C:\CHEM32\1\METHODS\DEF\_LC.M  
 Last changed : 12/28/2022 2:38:29 AM  
 (modified after loading)  
 Analysis Method : C:\CHEM32\1\METHODS\DEF\_LC.M  
 Last changed : 12/28/2022 7:07:08 AM  
 (modified after loading)  
 Sample Info : IB, Hexane/i-PrOH = 94/6, 1.0 mL/min, 30 oC, 254 nm

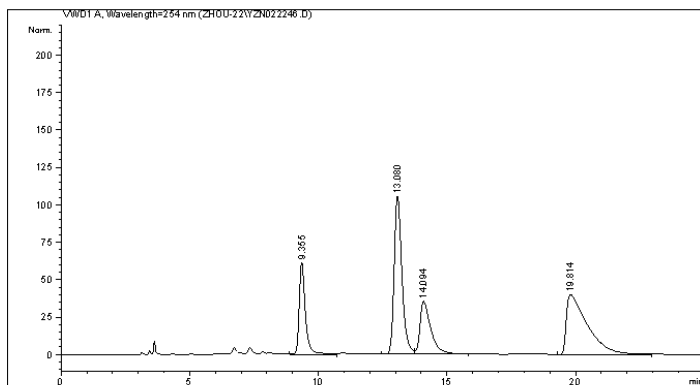

=====  
 Area Percent Report  
 =====

Sorted By : Signal  
 Multiplier: : 1.0000  
 Dilution: : 1.0000  
 Use Multiplier & Dilution Factor with ISTDs

Signal 1: WVD1 A, Wavelength=254 nm

| Peak # | RetTime [min] | Type | Width [min] | Area [mAU] | Height [mAU] | Area %  |
|--------|---------------|------|-------------|------------|--------------|---------|
| 1      | 9.355         | VV   | 0.2485      | 1026.85571 | 61.56679     | 15.6667 |
| 2      | 13.080        | BV   | 0.3230      | 2235.13110 | 105.44186    | 34.1014 |
| 3      | 14.094        | VB   | 0.4324      | 1035.48242 | 35.31476     | 15.7983 |
| 4      | 19.814        | VB   | 0.8030      | 2256.90283 | 39.87349     | 34.4335 |

Totals : 6554.37207 242.19690

=====  
 \*\*\* End of Report \*\*\*

Instrument 1 12/28/2022 7:07:16 AM

Page 1 of 1

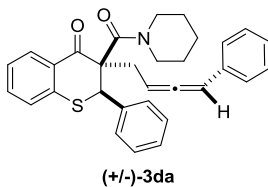

Data File C:\CHEM32\1\DATA\ZHOU-22\YZN022247.D  
 Sample Name: LL-11-55

=====  
 Acq. Operator :  
 Acq. Instrument : Instrument 1 Location : -  
 Injection Date : 12/28/2022 3:40:27 AM  
 Acq. Method : C:\CHEM32\1\METHODS\DEF\_LC.M  
 Last changed : 12/28/2022 3:38:28 AM  
 (modified after loading)  
 Analysis Method : C:\CHEM32\1\METHODS\DEF\_LC.M  
 Last changed : 12/28/2022 7:11:09 AM  
 (modified after loading)  
 Sample Info : IB, Hexane/i-PrOH = 94/6, 1.0 mL/min, 30 oC, 254 nm

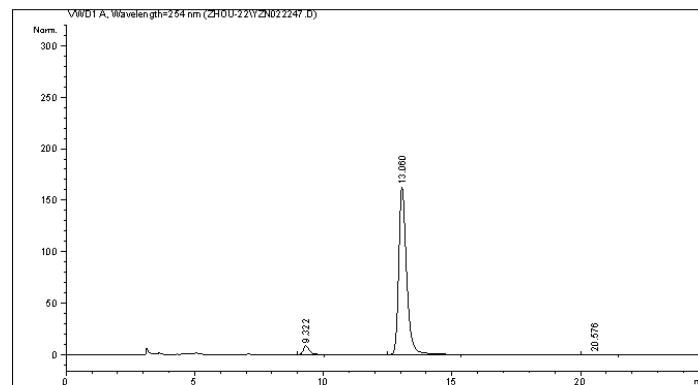

=====  
 Area Percent Report  
 =====

Sorted By : Signal  
 Multiplier: : 1.0000  
 Dilution: : 1.0000  
 Use Multiplier & Dilution Factor with ISTDs

Signal 1: WVD1 A, Wavelength=254 nm

| Peak # | RetTime [min] | Type | Width [min] | Area [mAU] | Height [mAU] | Area %  |
|--------|---------------|------|-------------|------------|--------------|---------|
| 1      | 9.322         | BB   | 0.2406      | 133.84752  | 8.42971      | 3.7125  |
| 2      | 13.060        | BB   | 0.3217      | 3467.33984 | 162.54366    | 96.1728 |
| 3      | 20.576        | BB   | 0.5043      | 4.13658    | 9.73773e-2   | 0.1147  |

Totals : 3605.32394 171.07074

=====  
 \*\*\* End of Report \*\*\*

Instrument 1 12/28/2022 7:11:14 AM

Page 1 of 1

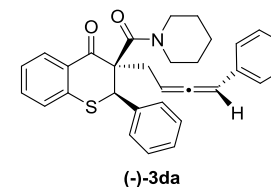

Data File C:\CHEM32\1\DATA\ZHOU-22\YZN021807.D  
 Sample Name: LL-10-91 +/-

=====  
 Acq. Operator :  
 Acq. Instrument : Instrument 1 Location : -  
 Injection Date : 10/19/2022 9:35:00 PM  
 Acq. Method : C:\CHEM32\1\METHODS\DEF\_LC.M  
 Last changed : 10/19/2022 9:33:18 PM  
 (modified after loading)  
 Analysis Method : C:\CHEM32\1\METHODS\DEF\_LC.M  
 Last changed : 10/20/2022 9:17:15 AM  
 (modified after loading)  
 Sample Info : IB, Hexane/i-PrOH = 80/20, 1.0 mL/min, 30 oC, 254 nm

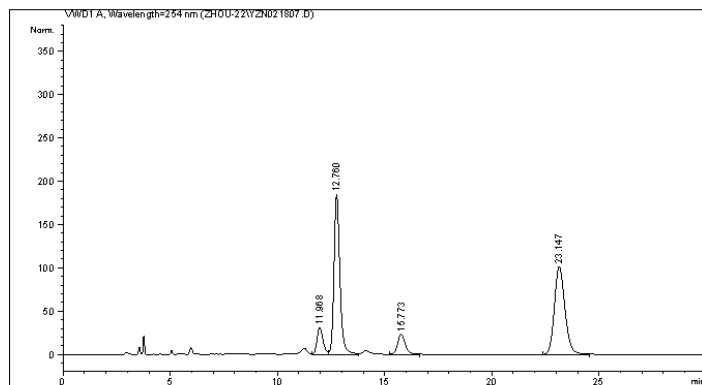

=====  
 Area Percent Report  
 =====

Sorted By : Signal  
 Multiplier: : 1.0000  
 Dilution: : 1.0000  
 Use Multiplier & Dilution Factor with ISTDs

Signal 1: VWD1 A, Wavelength=254 nm

| Peak # | RetTime [min] | Type | Width [min] | Area [mAU] | Height [mAU] | Area %  |
|--------|---------------|------|-------------|------------|--------------|---------|
| 1      | 11.968        | VV   | 0.2969      | 599.92419  | 31.03337     | 7.3543  |
| 2      | 12.760        | VV   | 0.2895      | 3518.40283 | 184.44260    | 43.1311 |
| 3      | 15.773        | BB   | 0.3779      | 568.60596  | 23.06100     | 6.9704  |
| 4      | 23.147        | BB   | 0.5238      | 3470.52051 | 101.58165    | 42.5442 |

Totals : 8157.45349 340.11861

=====  
 \*\*\* End of Report \*\*\*

Instrument 1 10/20/2022 9:17:21 AM

Page 1 of 1

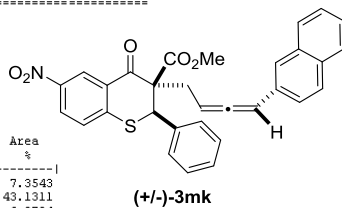

Data File C:\CHEM32\1\DATA\ZHOU-22\YZN021806.D  
 Sample Name: LL-10-91

=====  
 Acq. Operator :  
 Acq. Instrument : Instrument 1 Location : -  
 Injection Date : 10/19/2022 8:20:31 PM  
 Acq. Method : C:\CHEM32\1\METHODS\DEF\_LC.M  
 Last changed : 10/19/2022 7:51:35 PM  
 (modified after loading)  
 Analysis Method : C:\CHEM32\1\METHODS\DEF\_LC.M  
 Last changed : 10/20/2022 9:19:44 AM  
 (modified after loading)  
 Sample Info : IB, Hexane/i-PrOH = 80/20, 1.0 mL/min, 30 oC, 254 nm

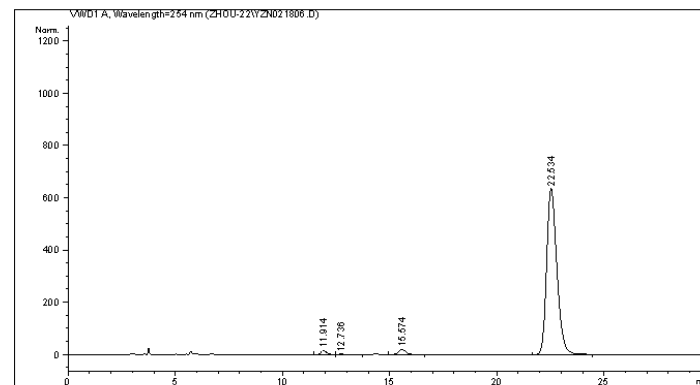

=====  
 Area Percent Report  
 =====

Sorted By : Signal  
 Multiplier: : 1.0000  
 Dilution: : 1.0000  
 Use Multiplier & Dilution Factor with ISTDs

Signal 1: VWD1 A, Wavelength=254 nm

| Peak # | RetTime [min] | Type | Width [min] | Area [mAU] | Height [mAU] | Area %  |
|--------|---------------|------|-------------|------------|--------------|---------|
| 1      | 11.914        | VV   | 0.3045      | 288.89047  | 15.81055     | 1.3195  |
| 2      | 12.736        | VB   | 0.3716      | 34.89754   | 1.56533      | 0.1594  |
| 3      | 15.574        | VB   | 0.4055      | 486.77145  | 20.00565     | 2.2233  |
| 4      | 22.534        | BB   | 0.5537      | 2.10831e4  | 634.59418    | 96.2977 |

Totals : 2.18936e4 671.97571

=====  
 \*\*\* End of Report \*\*\*

Instrument 1 10/20/2022 9:19:49 AM

Page 1 of 1

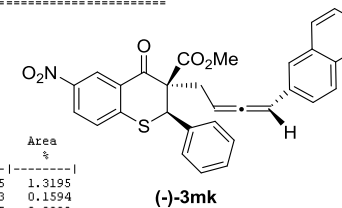

Data File C:\CHEM32\1\DATA\ZHOU-22\YZN021511.D  
 Sample Name: LL-10-41B +/-

=====  
 Acq. Operator :  
 Acq. Instrument : Instrument 1 Location : -  
 Injection Date : 7/12/2022 11:43:50 PM  
 Acq. Method : C:\CHEM32\1\METHODS\DEF\_LC.M  
 Last changed : 7/12/2022 11:42:35 PM  
 (modified after loading)  
 Analysis Method : C:\CHEM32\1\METHODS\DEF\_LC.M  
 Last changed : 7/13/2022 9:48:22 AM  
 (modified after loading)  
 Sample Info : OD-H, Hexane/i-PrOH = 95/5, 1.0 mL/min, 30 oC, 254 nm

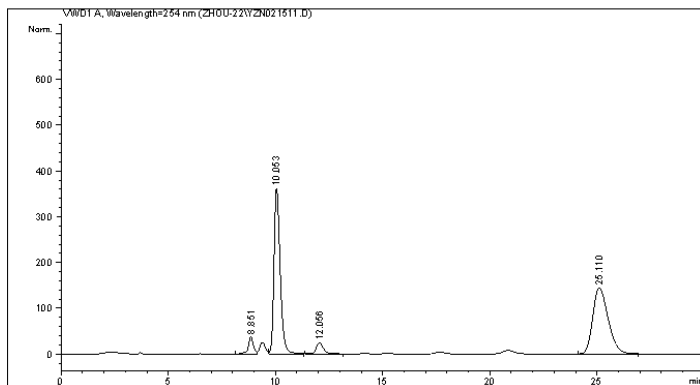

=====  
 Area Percent Report  
 =====

Sorted By : Signal  
 Multiplier: : 1.0000  
 Dilution: : 1.0000  
 Use Multiplier & Dilution Factor with ISTDs

Signal 1: VWD1 A, Wavelength=254 nm

| Peak # | RetTime [min] | Type | Width [min] | Area [mAU*s] | Height [mAU] | Area %  |
|--------|---------------|------|-------------|--------------|--------------|---------|
| 1      | 8.851         | EV   | 0.2473      | 609.97455    | 37.34377     | 3.8930  |
| 2      | 10.053        | VB   | 0.3069      | 7261.25586   | 361.86163    | 46.3432 |
| 3      | 12.056        | BB   | 0.3781      | 604.73486    | 24.14730     | 3.8596  |
| 4      | 25.110        | BB   | 0.7700      | 7192.47559   | 144.86612    | 45.9042 |

Totals : 1.56684e4 568.21882

=====  
 \*\*\* End of Report \*\*\*

Instrument 1 7/13/2022 9:51:09 AM

Page 1 of 1

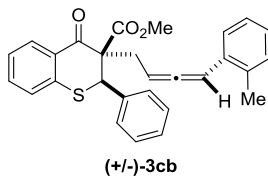

Data File C:\CHEM32\1\DATA\ZHOU-22\YZN021510.D  
 Sample Name: LL-10-41B

=====  
 Acq. Operator :  
 Acq. Instrument : Instrument 1 Location : -  
 Injection Date : 7/12/2022 11:11:48 PM  
 Acq. Method : C:\CHEM32\1\METHODS\DEF\_LC.M  
 Last changed : 7/12/2022 10:52:16 PM  
 (modified after loading)  
 Analysis Method : C:\CHEM32\1\METHODS\DEF\_LC.M  
 Last changed : 7/13/2022 9:52:38 AM  
 (modified after loading)  
 Sample Info : OD-H, Hexane/i-PrOH = 95/5, 1.0 mL/min, 30 oC, 254 nm

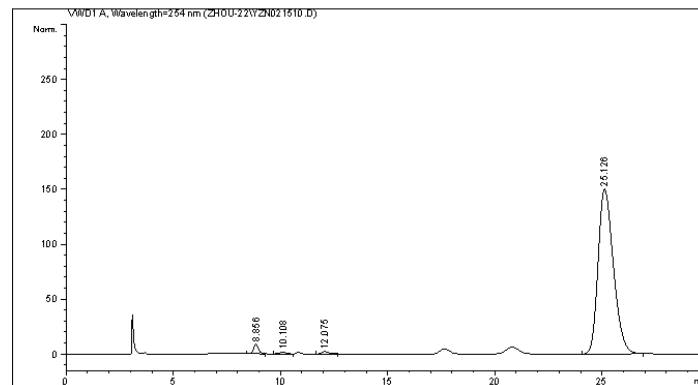

=====  
 Area Percent Report  
 =====

Sorted By : Signal  
 Multiplier: : 1.0000  
 Dilution: : 1.0000  
 Use Multiplier & Dilution Factor with ISTDs

Signal 1: VWD1 A, Wavelength=254 nm

| Peak # | RetTime [min] | Type | Width [min] | Area [mAU*s] | Height [mAU] | Area %  |
|--------|---------------|------|-------------|--------------|--------------|---------|
| 1      | 8.856         | BB   | 0.2383      | 131.87021    | 8.54310      | 1.7209  |
| 2      | 10.108        | EV   | 0.3297      | 36.70646     | 1.70549      | 0.4790  |
| 3      | 12.075        | BB   | 0.3454      | 49.80859     | 2.15486      | 0.6500  |
| 4      | 25.126        | BB   | 0.7652      | 7444.52246   | 150.05699    | 97.1501 |

Totals : 7662.90771 162.46044

=====  
 \*\*\* End of Report \*\*\*

Instrument 1 7/13/2022 9:52:40 AM

Page 1 of 1

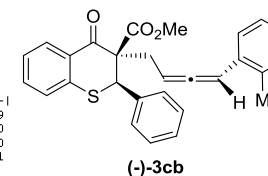

Data File C:\CHEM32\1\DATA\ZHOU-22\YZN021513.D  
 Sample Name: LL-10-41C +/-

=====  
 Acq. Operator :  
 Acq. Instrument : Instrument 1 Location : -  
 Injection Date : 7/13/2022 2:40:13 AM  
 Acq. Method : C:\CHEM32\1\METHODS\DEF\_LC.M  
 Last changed : 7/13/2022 2:36:21 AM  
 (modified after loading)  
 Analysis Method : C:\CHEM32\1\METHODS\DEF\_LC.M  
 Last changed : 7/13/2022 9:57:16 AM  
 (modified after loading)  
 Sample Info : OD-H, Hexane/i-PrOH = 95/5, 1.0 mL/min, 30 oC, 254 nm

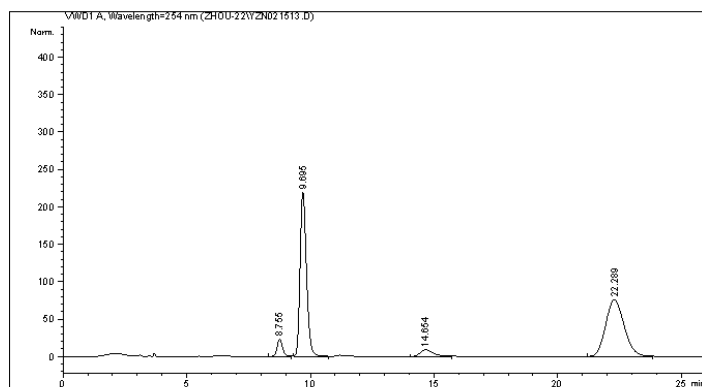

=====  
 Area Percent Report  
 =====

Sorted By : Signal  
 Multiplier: : 1.0000  
 Dilution: : 1.0000  
 Use Multiplier & Dilution Factor with ISTDs

Signal 1: WVD1 A, Wavelength=254 nm

| Peak # | RetTime [min] | Type | Width [min] | Area [mAU*s] | Height [mAU] | Area %  |
|--------|---------------|------|-------------|--------------|--------------|---------|
| 1      | 8.755         | BB   | 0.2370      | 355.48538    | 23.01476     | 4.1674  |
| 2      | 9.695         | BB   | 0.2763      | 3939.74927   | 219.56552    | 46.1862 |
| 3      | 14.654        | BB   | 0.5372      | 319.35623    | 8.91707      | 3.7439  |
| 4      | 22.289        | BB   | 0.8076      | 3915.56177   | 75.65646     | 45.9026 |

Totals : 8530.15265 327.15382

=====  
 \*\*\* End of Report \*\*\*

Instrument 1 7/13/2022 9:57:19 AM

Page 1 of 1

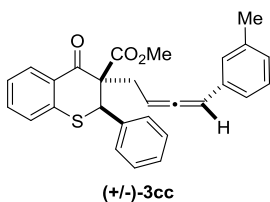

Data File C:\CHEM32\1\DATA\ZHOU-22\YZN021512.D  
 Sample Name: LL-10-41C

=====  
 Acq. Operator :  
 Acq. Instrument : Instrument 1 Location : -  
 Injection Date : 7/13/2022 2:03:52 AM  
 Acq. Method : C:\CHEM32\1\METHODS\DEF\_LC.M  
 Last changed : 7/13/2022 1:18:45 AM  
 (modified after loading)  
 Analysis Method : C:\CHEM32\1\METHODS\DEF\_LC.M  
 Last changed : 7/13/2022 9:59:51 AM  
 (modified after loading)  
 Sample Info : OD-H, Hexane/i-PrOH = 95/5, 1.0 mL/min, 30 oC, 254 nm

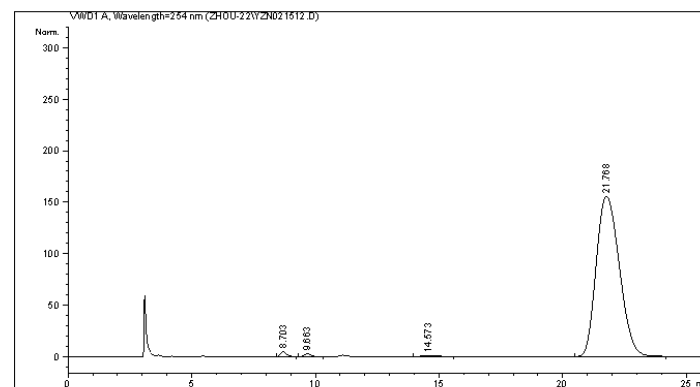

=====  
 Area Percent Report  
 =====

Sorted By : Signal  
 Multiplier: : 1.0000  
 Dilution: : 1.0000  
 Use Multiplier & Dilution Factor with ISTDs

Signal 1: WVD1 A, Wavelength=254 nm

| Peak # | RetTime [min] | Type | Width [min] | Area [mAU*s] | Height [mAU] | Area %  |
|--------|---------------|------|-------------|--------------|--------------|---------|
| 1      | 8.703         | BB   | 0.2401      | 75.96688     | 4.87356      | 0.7375  |
| 2      | 9.663         | BB   | 0.2808      | 48.24833     | 2.63208      | 0.4684  |
| 3      | 14.573        | BB   | 0.5498      | 41.64367     | 1.12108      | 0.4043  |
| 4      | 21.768        | BB   | 1.0323      | 1.01341e4    | 155.85570    | 98.3897 |

Totals : 1.03000e4 164.48252

=====  
 \*\*\* End of Report \*\*\*

Instrument 1 7/13/2022 9:59:54 AM

Page 1 of 1

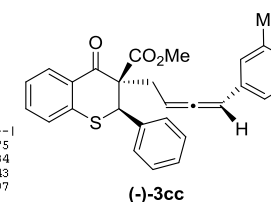

Data File C:\CHEM32\1\DATA\ZHOU-22\YZN021515.D  
 Sample Name: LL-10-41D +/-

=====  
 Acq. Operator :  
 Acq. Instrument : Instrument 1 Location : -  
 Injection Date : 7/13/2022 3:44:48 AM  
 Acq. Method : C:\CHEM32\1\METHODS\DEF\_LC.M  
 Last changed : 7/13/2022 3:43:33 AM  
 (modified after loading)  
 Analysis Method : C:\CHEM32\1\METHODS\DEF\_LC.M  
 Last changed : 7/13/2022 10:04:33 AM  
 (modified after loading)  
 Sample Info : OD-H, Hexane/i-PrOH = 95/5, 1.0 mL/min, 30 oC, 254 nm

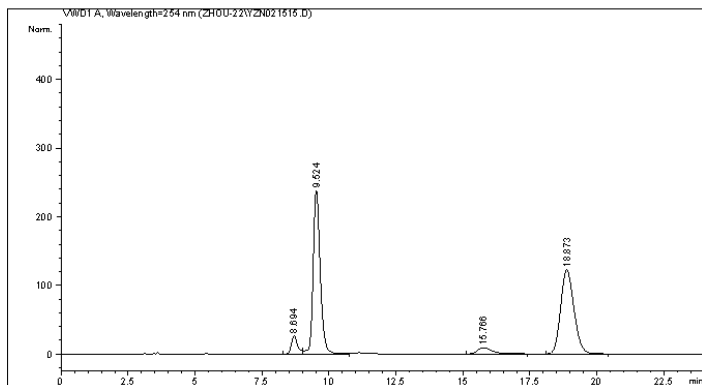

=====  
 Area Percent Report  
 =====

Sorted By : Signal  
 Multiplier: : 1.0000  
 Dilution: : 1.0000  
 Use Multiplier & Dilution Factor with ISTDs

Signal 1: VWD1 A, Wavelength=254 nm

| Peak # | RetTime [min] | Type | Width [min] | Area [mAU] | Height [%] | Area [%] |
|--------|---------------|------|-------------|------------|------------|----------|
| 1      | 8.694         | VV   | 0.2425      | 427.73480  | 26.45411   | 4.5443   |
| 2      | 9.524         | VV   | 0.2810      | 4403.81104 | 238.46748  | 46.7862  |
| 3      | 15.766        | BB   | 0.5838      | 353.51495  | 8.99354    | 3.7557   |
| 4      | 18.873        | BB   | 0.5337      | 4227.57227 | 122.49112  | 44.9138  |

Totals : 9412.63306 396.40625

=====  
 \*\*\* End of Report \*\*\*

Instrument 1 7/13/2022 10:04:37 AM

Page 1 of 1

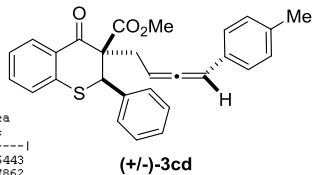

Data File C:\CHEM32\1\DATA\ZHOU-22\YZN021514.D  
 Sample Name: LL-10-41D

=====  
 Acq. Operator :  
 Acq. Instrument : Instrument 1 Location : -  
 Injection Date : 7/13/2022 3:15:37 AM  
 Acq. Method : C:\CHEM32\1\METHODS\DEF\_LC.M  
 Last changed : 7/13/2022 3:07:28 AM  
 (modified after loading)  
 Analysis Method : C:\CHEM32\1\METHODS\DEF\_LC.M  
 Last changed : 7/13/2022 10:06:41 AM  
 (modified after loading)  
 Sample Info : OD-H, Hexane/i-PrOH = 95/5, 1.0 mL/min, 30 oC, 254 nm

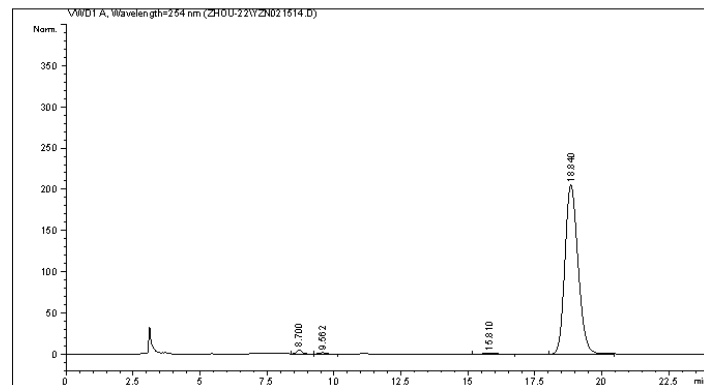

=====  
 Area Percent Report  
 =====

Sorted By : Signal  
 Multiplier: : 1.0000  
 Dilution: : 1.0000  
 Use Multiplier & Dilution Factor with ISTDs

Signal 1: VWD1 A, Wavelength=254 nm

| Peak # | RetTime [min] | Type | Width [min] | Area [mAU] | Height [%] | Area [%] |
|--------|---------------|------|-------------|------------|------------|----------|
| 1      | 8.700         | VV   | 0.2391      | 76.16090   | 4.83464    | 1.0714   |
| 2      | 9.562         | VB   | 0.2840      | 31.32374   | 1.66183    | 0.4406   |
| 3      | 15.810        | BB   | 0.4785      | 22.21332   | 5.92009e-1 | 0.3125   |
| 4      | 18.840        | BB   | 0.5308      | 6978.90723 | 205.18338  | 98.1755  |

Totals : 7108.60519 212.27186

=====  
 \*\*\* End of Report \*\*\*

Instrument 1 7/13/2022 10:06:43 AM

Page 1 of 1

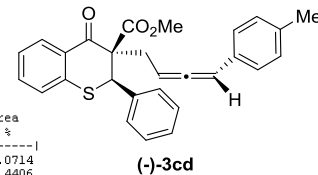



Data File C:\CHEM32\1\DATA\ZHOU-22\YZN021544.D  
 Sample Name: LL-10-48A +/-

=====  
 Acq. Operator :  
 Acq. Instrument : Instrument 1 Location : -  
 Injection Date : 7/21/2022 9:23:56 PM  
 Acq. Method : C:\CHEM32\1\METHODS\DEF\_LC.M  
 Last changed : 7/21/2022 9:23:44 PM  
 (modified after loading)  
 Analysis Method : C:\CHEM32\1\METHODS\DEF\_LC.M  
 Last changed : 7/21/2022 11:39:52 PM  
 (modified after loading)  
 Sample Info : OD-3, Hexane/i-PrOH = 95/5, 0.8 mL/min, 30 oC, 254 nm

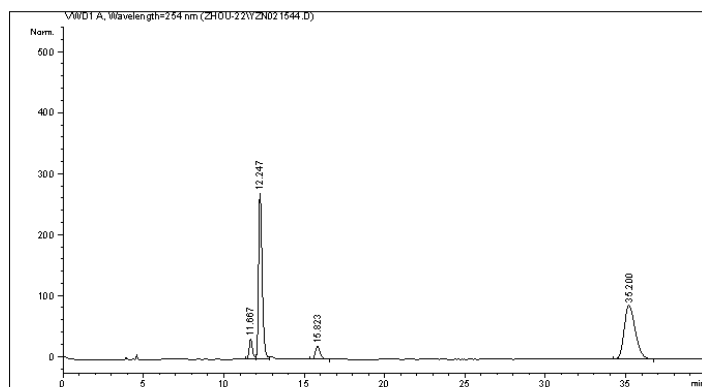

=====  
 Area Percent Report  
 =====

Sorted By : Signal  
 Multiplier: : 1.0000  
 Dilution: : 1.0000  
 Use Multiplier & Dilution Factor with ISTDs

Signal 1: WVD1 A, Wavelength=254 nm

| Peak # | RetTime [min] | Type | Width [min] | Area [mAU*s] | Height [mAU] | Area %  |
|--------|---------------|------|-------------|--------------|--------------|---------|
| 1      | 11.667        | VV   | 0.2227      | 487.38809    | 33.38966     | 5.1570  |
| 2      | 12.247        | VV   | 0.2406      | 4294.65479   | 272.57999    | 45.4412 |
| 3      | 15.823        | VB   | 0.3153      | 437.54269    | 21.18040     | 4.6296  |
| 4      | 35.200        | BB   | 0.7468      | 4231.42529   | 88.31273     | 44.7722 |

Totals : 9451.01086 415.46278

=====  
 \*\*\* End of Report \*\*\*

Instrument 1 7/21/2022 11:41:35 PM

Page 1 of 1

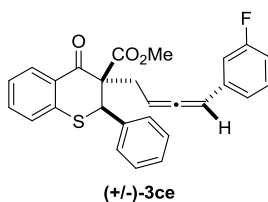

Data File C:\CHEM32\1\DATA\ZHOU-22\YZN021543.D  
 Sample Name: LL-10-48A

=====  
 Acq. Operator :  
 Acq. Instrument : Instrument 1 Location : -  
 Injection Date : 7/21/2022 8:43:11 PM  
 Acq. Method : C:\CHEM32\1\METHODS\DEF\_LC.M  
 Last changed : 7/21/2022 7:55:42 PM  
 (modified after loading)  
 Analysis Method : C:\CHEM32\1\METHODS\DEF\_LC.M  
 Last changed : 7/21/2022 11:39:52 PM  
 (modified after loading)  
 Sample Info : OD-3, Hexane/i-PrOH = 95/5, 0.8 mL/min, 30 oC, 254 nm

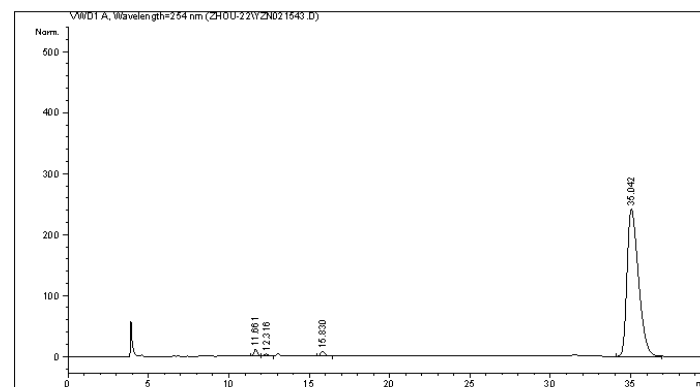

=====  
 Area Percent Report  
 =====

Sorted By : Signal  
 Multiplier: : 1.0000  
 Dilution: : 1.0000  
 Use Multiplier & Dilution Factor with ISTDs

Signal 1: WVD1 A, Wavelength=254 nm

| Peak # | RetTime [min] | Type | Width [min] | Area [mAU*s] | Height [mAU] | Area %  |
|--------|---------------|------|-------------|--------------|--------------|---------|
| 1      | 11.661        | BV   | 0.2154      | 163.26605    | 11.68452     | 1.3286  |
| 2      | 12.316        | VB   | 0.2666      | 64.76287     | 3.67800      | 0.5270  |
| 3      | 15.830        | BB   | 0.3145      | 155.72932    | 7.60719      | 1.2673  |
| 4      | 35.042        | BB   | 0.7585      | 1.19044e4    | 241.51691    | 96.8770 |

Totals : 1.22881e4 264.48662

=====  
 \*\*\* End of Report \*\*\*

Instrument 1 7/21/2022 11:39:56 PM

Page 1 of 1

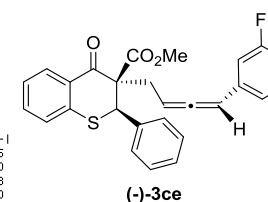

Data File C:\CHEM32\1\DATA\ZHOU-22\YZN021546.D  
 Sample Name: LL-10-48B +/-

=====  
 Acq. Operator :  
 Acq. Instrument : Instrument 1 Location : -  
 Injection Date : 7/21/2022 10:48:39 PM  
 Acq. Method : C:\CHEM32\1\METHODS\DEF\_LC.M  
 Last changed : 7/21/2022 10:48:12 PM  
 (modified after loading)  
 Analysis Method : C:\CHEM32\1\METHODS\DEF\_LC.M  
 Last changed : 7/22/2022 10:06:38 AM  
 (modified after loading)  
 Sample Info : OD-3, Hexane/i-PrOH = 95/5, 0.8 mL/min, 30 oC, 254 nm

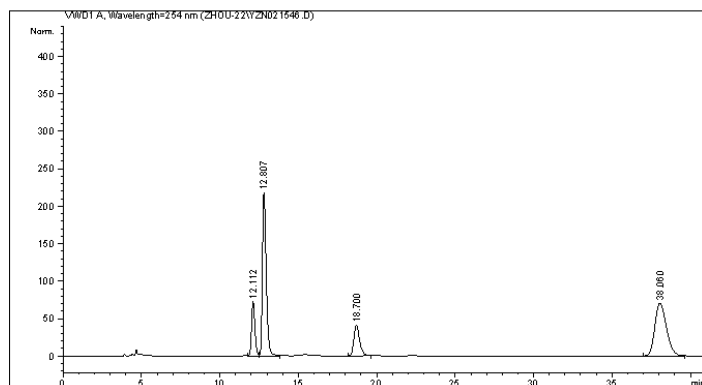

=====  
 Area Percent Report  
 =====

Sorted By : Signal  
 Multiplier: : 1.0000  
 Dilution: : 1.0000  
 Use Multiplier & Dilution Factor with ISTDs

Signal 1: VWD1 A, Wavelength=254 nm

| Peak # | RetTime [min] | Type | Width [min] | Area [mAU] | Height [mAU] | Area %  |
|--------|---------------|------|-------------|------------|--------------|---------|
| 1      | 12.112        | VV   | 0.2295      | 1082.02344 | 72.47380     | 11.4343 |
| 2      | 12.807        | VB   | 0.2594      | 3699.03784 | 217.69196    | 39.0898 |
| 3      | 18.700        | EB   | 0.3912      | 1055.68799 | 41.12384     | 11.1560 |
| 4      | 38.060        | BB   | 0.7947      | 3626.18237 | 70.56090     | 38.3199 |

Totals : 9462.93164 401.85050

=====  
 \*\*\* End of Report \*\*\*

Instrument 1 7/22/2022 10:07:05 AM

Page 1 of 1

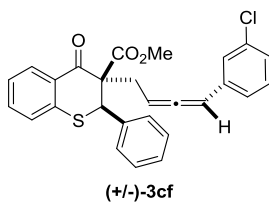

Data File C:\CHEM32\1\DATA\ZHOU-22\YZN021545.D  
 Sample Name: LL-10-48B

=====  
 Acq. Operator :  
 Acq. Instrument : Instrument 1 Location : -  
 Injection Date : 7/21/2022 10:05:32 PM  
 Acq. Method : C:\CHEM32\1\METHODS\DEF\_LC.M  
 Last changed : 7/21/2022 10:04:30 PM  
 (modified after loading)  
 Analysis Method : C:\CHEM32\1\METHODS\DEF\_LC.M  
 Last changed : 7/22/2022 10:04:30 AM  
 (modified after loading)  
 Sample Info : OD-3, Hexane/i-PrOH = 95/5, 0.8 mL/min, 30 oC, 254 nm

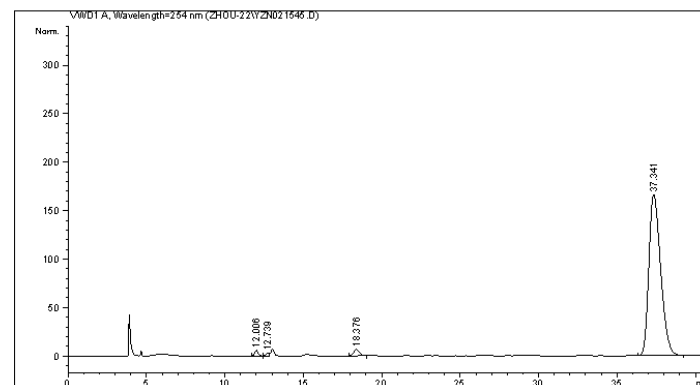

=====  
 Area Percent Report  
 =====

Sorted By : Signal  
 Multiplier: : 1.0000  
 Dilution: : 1.0000  
 Use Multiplier & Dilution Factor with ISTDs

Signal 1: VWD1 A, Wavelength=254 nm

| Peak # | RetTime [min] | Type | Width [min] | Area [mAU] | Height [mAU] | Area %  |
|--------|---------------|------|-------------|------------|--------------|---------|
| 1      | 12.006        | EB   | 0.2282      | 85.89397   | 5.79628      | 0.9573  |
| 2      | 12.739        | EV   | 0.2121      | 43.48048   | 3.11931      | 0.4846  |
| 3      | 18.376        | EB   | 0.3801      | 162.03986  | 6.58871      | 1.8060  |
| 4      | 37.341        | BB   | 0.8133      | 8680.69629 | 166.17635    | 96.7520 |

Totals : 8972.11060 181.68064

=====  
 \*\*\* End of Report \*\*\*

Instrument 1 7/22/2022 10:04:39 AM

Page 1 of 1

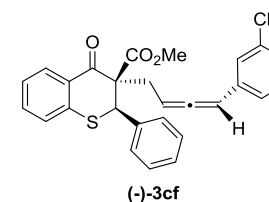

Data File C:\CHEM32\1\DATA\ZHOU-22\YZN021548.D  
 Sample Name: LL-10-48C +/-

=====  
 Acq. Operator :  
 Acq. Instrument : Instrument 1 Location : -  
 Injection Date : 7/22/2022 12:16:30 AM  
 Acq. Method : C:\CHEM32\1\METHODS\DEF\_LC.M  
 Last changed : 7/22/2022 12:15:50 AM  
 (modified after loading)  
 Analysis Method : C:\CHEM32\1\METHODS\DEF\_LC.M  
 Last changed : 7/22/2022 10:14:58 AM  
 (modified after loading)  
 Sample Info : OD-3, Hexane/i-PrOH = 95/5, 0.8 mL/min, 30 oC, 254 nm

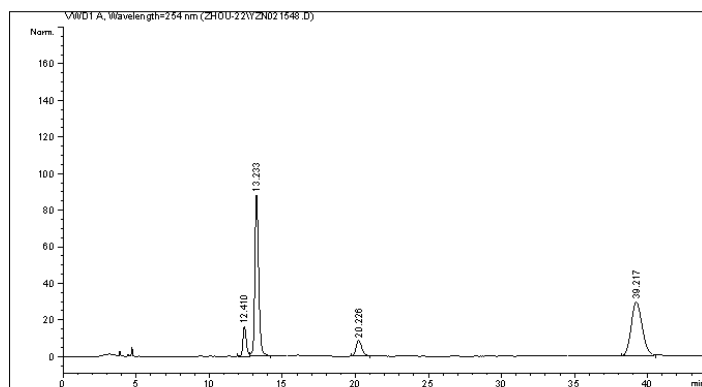

=====  
 Area Percent Report  
 =====

Sorted By : Signal  
 Multiplier: : 1.0000  
 Dilution: : 1.0000  
 Use Multiplier & Dilution Factor with ISTDs

Signal 1: WVD1 A, Wavelength=254 nm

| Peak # | RetTime [min] | Type | Width [min] | Area [mAU] | Height [mAU] | Area %  |
|--------|---------------|------|-------------|------------|--------------|---------|
| 1      | 12.410        | BV   | 0.2463      | 260.25967  | 16.14247     | 7.2047  |
| 2      | 13.233        | VB   | 0.2767      | 1596.99915 | 88.23946     | 44.2091 |
| 3      | 20.226        | EB   | 0.4272      | 237.74484  | 8.64189      | 6.5814  |
| 4      | 39.217        | BB   | 0.8056      | 1517.37439 | 29.34702     | 42.0049 |

Totals : 3612.37805 142.37085

=====  
 \*\*\* End of Report \*\*\*

Instrument 1 7/22/2022 10:15:03 AM

Page 1 of 1

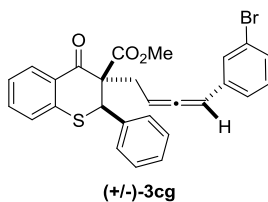

Data File C:\CHEM32\1\DATA\ZHOU-22\YZN021547.D  
 Sample Name: LL-10-48C

=====  
 Acq. Operator :  
 Acq. Instrument : Instrument 1 Location : -  
 Injection Date : 7/21/2022 11:31:27 PM  
 Acq. Method : C:\CHEM32\1\METHODS\DEF\_LC.M  
 Last changed : 7/21/2022 11:31:04 PM  
 (modified after loading)  
 Analysis Method : C:\CHEM32\1\METHODS\DEF\_LC.M  
 Last changed : 7/22/2022 10:13:11 AM  
 (modified after loading)  
 Sample Info : OD-3, Hexane/i-PrOH = 95/5, 0.8 mL/min, 30 oC, 254 nm

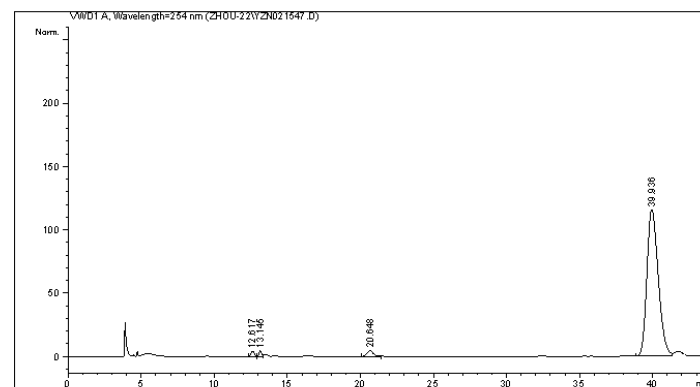

=====  
 Area Percent Report  
 =====

Sorted By : Signal  
 Multiplier: : 1.0000  
 Dilution: : 1.0000  
 Use Multiplier & Dilution Factor with ISTDs

Signal 1: WVD1 A, Wavelength=254 nm

| Peak # | RetTime [min] | Type | Width [min] | Area [mAU] | Height [mAU] | Area %  |
|--------|---------------|------|-------------|------------|--------------|---------|
| 1      | 12.617        | BV   | 0.2411      | 66.40042   | 4.23675      | 1.0209  |
| 2      | 13.145        | VV   | 0.1952      | 58.21764   | 4.57029      | 0.8951  |
| 3      | 20.648        | EB   | 0.4388      | 126.19016  | 4.50699      | 1.9402  |
| 4      | 39.936        | BV   | 0.8360      | 6253.27637 | 115.93504    | 96.1438 |

Totals : 6504.08458 129.24908

=====  
 \*\*\* End of Report \*\*\*

Instrument 1 7/22/2022 10:13:15 AM

Page 1 of 1

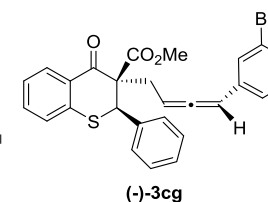

Data File C:\CHEM32\1\DATA\ZHOU-22\YZN021529.D  
 Sample Name: LL-10-48D +/-

=====  
 Acq. Operator :  
 Acq. Instrument : Instrument 1 Location : -  
 Injection Date : 7/19/2022 9:39:10 PM  
 Acq. Method : C:\CHEM32\1\METHODS\DEF\_LC.M  
 Last changed : 7/19/2022 9:37:20 PM  
 (modified after loading)  
 Analysis Method : C:\CHEM32\1\METHODS\DEF\_LC.M  
 Last changed : 7/20/2022 3:16:36 AM  
 (modified after loading)  
 Sample Info : OD-3, Hexane/i-PrOH = 94/6, 0.8 mL/min, 30 oC, 254 nm

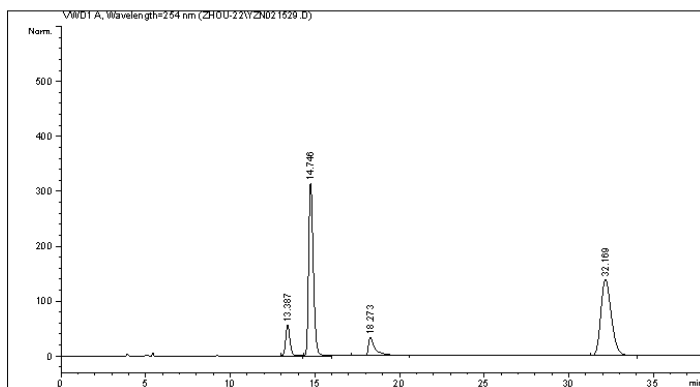

=====  
 Area Percent Report  
 =====

Sorted By : Signal  
 Multiplier: : 1.0000  
 Dilution: : 1.0000  
 Use Multiplier & Dilution Factor with ISTDs

Signal 1: VWD1 A, Wavelength=254 nm

| Peak # | RetTime [min] | Type | Width [min] | Area [mAU] | Height [mAU] | Area %  |
|--------|---------------|------|-------------|------------|--------------|---------|
| 1      | 13.387        | BB   | 0.2705      | 982.42444  | 55.91048     | 7.0429  |
| 2      | 14.746        | BB   | 0.2928      | 5998.19287 | 313.98233    | 43.0003 |
| 3      | 18.273        | VB   | 0.4124      | 990.43689  | 33.74031     | 7.1003  |
| 4      | 32.169        | BB   | 0.6657      | 5978.12354 | 138.77162    | 42.8565 |

Totals : 1.39492e4 542.40474

=====  
 \*\*\* End of Report \*\*\*

Instrument 1 7/20/2022 3:16:46 AM

Page 1 of 1

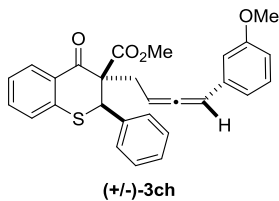

Data File C:\CHEM32\1\DATA\ZHOU-22\YZN021528.D  
 Sample Name: LL-10-48D

=====  
 Acq. Operator :  
 Acq. Instrument : Instrument 1 Location : -  
 Injection Date : 7/19/2022 8:54:08 PM  
 Acq. Method : C:\CHEM32\1\METHODS\DEF\_LC.M  
 Last changed : 7/19/2022 8:07:12 PM  
 (modified after loading)  
 Analysis Method : C:\CHEM32\1\METHODS\DEF\_LC.M  
 Last changed : 7/20/2022 3:17:36 AM  
 (modified after loading)  
 Sample Info : OD-3, Hexane/i-PrOH = 94/6, 0.8 mL/min, 30 oC, 254 nm

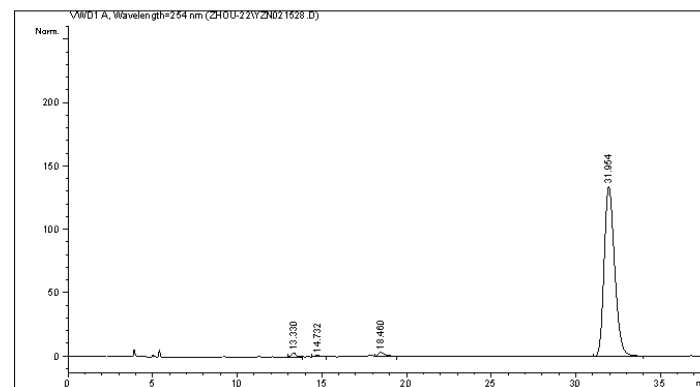

=====  
 Area Percent Report  
 =====

Sorted By : Signal  
 Multiplier: : 1.0000  
 Dilution: : 1.0000  
 Use Multiplier & Dilution Factor with ISTDs

Signal 1: VWD1 A, Wavelength=254 nm

| Peak # | RetTime [min] | Type | Width [min] | Area [mAU] | Height [mAU] | Area %  |
|--------|---------------|------|-------------|------------|--------------|---------|
| 1      | 13.330        | BB   | 0.2755      | 56.67506   | 3.20063      | 0.9536  |
| 2      | 14.732        | BB   | 0.2897      | 20.42396   | 1.08425      | 0.3436  |
| 3      | 18.460        | VB   | 0.4683      | 104.38224  | 3.24607      | 1.7563  |
| 4      | 31.954        | BB   | 0.6648      | 5761.81055 | 133.98936    | 96.9465 |

Totals : 5943.29180 141.52031

=====  
 \*\*\* End of Report \*\*\*

Instrument 1 7/20/2022 3:17:46 AM

Page 1 of 1

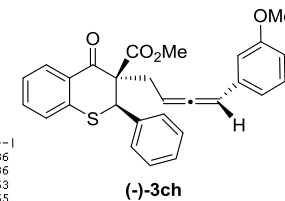

Data File C:\CHEM32\1\DATA\ZHOU-22\YZN021729.D  
 Sample Name: LL-10-74A +/-

=====  
 Acq. Operator :  
 Acq. Instrument : Instrument 1 Location : -  
 Injection Date : 9/29/2022 9:03:32 PM  
 Acq. Method : C:\CHEM32\1\METHODS\DEF\_LC.M  
 Last changed : 9/29/2022 8:58:52 PM  
 (modified after loading)  
 Analysis Method : C:\CHEM32\1\METHODS\DEF\_LC.M  
 Last changed : 9/29/2022 11:14:30 PM  
 (modified after loading)  
 Sample Info : OD-H, Hexane/i-PrOH = 96/4, 1.0 mL/min, 30 oC, 254 nm

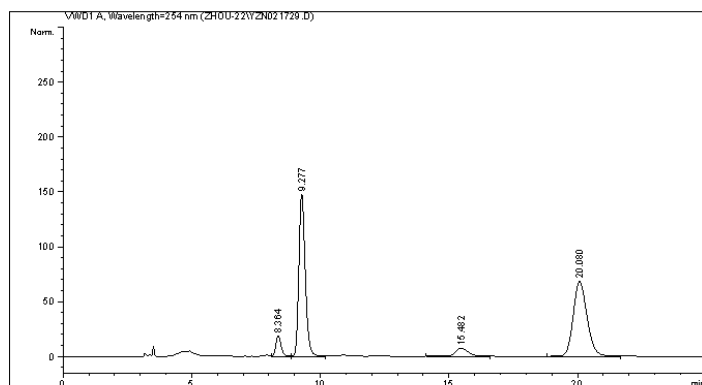

=====  
 Area Percent Report  
 =====

Sorted By : Signal  
 Multiplier: : 1.0000  
 Dilution: : 1.0000  
 Use Multiplier & Dilution Factor with ISTDs

Signal 1: WVD1 A, Wavelength=254 nm

| Peak # | RetTime [min] | Type | Width [min] | Area [mAU*s] | Height [mAU] | Area %  |
|--------|---------------|------|-------------|--------------|--------------|---------|
| 1      | 8.364         | VV   | 0.2272      | 277.44485    | 18.67989     | 4.9168  |
| 2      | 9.277         | VB   | 0.2654      | 2550.08911   | 147.77696    | 45.1921 |
| 3      | 15.482        | EB   | 0.5470      | 275.74170    | 7.57428      | 4.8866  |
| 4      | 20.080        | BB   | 0.5712      | 2539.49609   | 68.20557     | 45.0044 |

Totals : 5642.77176 242.23669

=====  
 \*\*\* End of Report \*\*\*

Instrument 1 9/29/2022 11:14:34 PM

Page 1 of 1

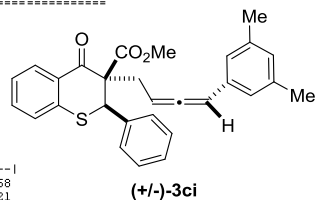

Data File C:\CHEM32\1\DATA\ZHOU-22\YZN021728.D  
 Sample Name: LL-10-74A

=====  
 Acq. Operator :  
 Acq. Instrument : Instrument 1 Location : -  
 Injection Date : 9/29/2022 8:33:03 PM  
 Acq. Method : C:\CHEM32\1\METHODS\DEF\_LC.M  
 Last changed : 9/29/2022 7:49:40 PM  
 (modified after loading)  
 Analysis Method : C:\CHEM32\1\METHODS\DEF\_LC.M  
 Last changed : 9/29/2022 11:15:41 PM  
 (modified after loading)  
 Sample Info : OD-H, Hexane/i-PrOH = 96/4, 1.0 mL/min, 30 oC, 254 nm

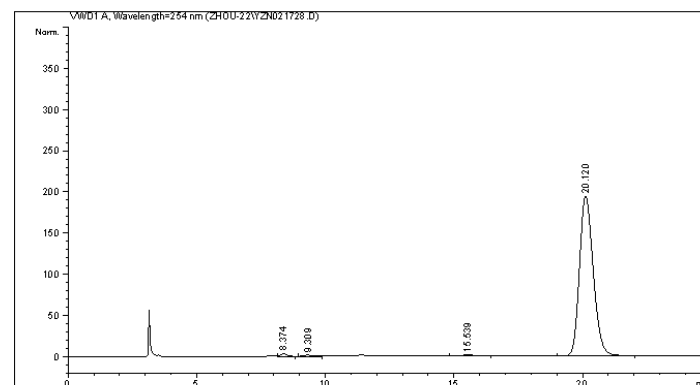

=====  
 Area Percent Report  
 =====

Sorted By : Signal  
 Multiplier: : 1.0000  
 Dilution: : 1.0000  
 Use Multiplier & Dilution Factor with ISTDs

Signal 1: WVD1 A, Wavelength=254 nm

| Peak # | RetTime [min] | Type | Width [min] | Area [mAU*s] | Height [mAU] | Area %  |
|--------|---------------|------|-------------|--------------|--------------|---------|
| 1      | 8.374         | VB   | 0.2196      | 46.83584     | 3.29737      | 0.6383  |
| 2      | 9.309         | EB   | 0.2758      | 27.89707     | 1.59160      | 0.3802  |
| 3      | 15.539        | EB   | 0.4939      | 47.86770     | 1.43521      | 0.6524  |
| 4      | 20.120        | BB   | 0.5762      | 7214.99951   | 194.17969    | 98.3291 |

Totals : 7337.60013 200.50386

=====  
 \*\*\* End of Report \*\*\*

Instrument 1 9/29/2022 11:15:45 PM

Page 1 of 1

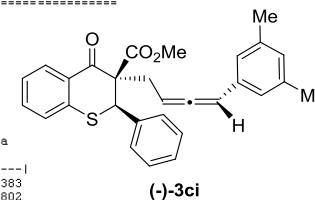

Data File C:\CHEM32\1\DATA\ZHOU-22\YZN021715.D  
 Sample Name: LL-10-74B +/-

=====  
 Acq. Operator :  
 Acq. Instrument : Instrument 1 Location : -  
 Injection Date : 9/28/2022 9:40:16 PM  
 Acq. Method : C:\CHEM32\1\METHODS\DEF\_LC.M  
 Last changed : 9/28/2022 8:27:29 PM  
 (modified after loading)  
 Analysis Method : C:\CHEM32\1\METHODS\DEF\_LC.M  
 Last changed : 9/30/2022 10:27:10 AM  
 (modified after loading)  
 Sample Info : ID+IC, Hexane/i-PrOH = 94/6, 1.0 mL/min, 30 oC, 254 nm

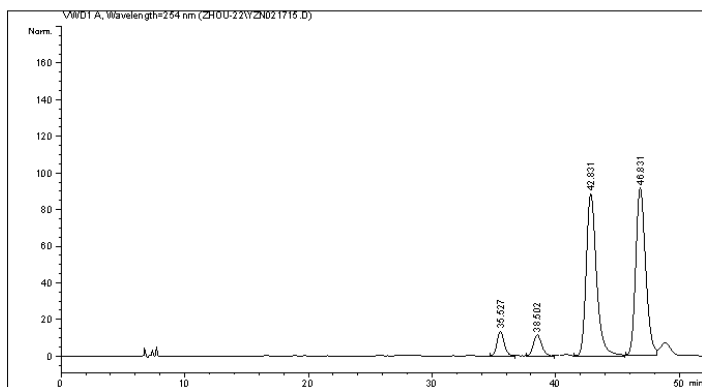

=====  
 Area Percent Report  
 =====

Sorted By : Signal  
 Multiplier: : 1.0000  
 Dilution: : 1.0000  
 Use Multiplier & Dilution Factor with ISTDs

Signal 1: VWD1 A, Wavelength=254 nm

| Peak # | RetTime [min] | Type | Width [min] | Area [mAU] | Height [mAU] | Area %  |
|--------|---------------|------|-------------|------------|--------------|---------|
| 1      | 35.527        | BB   | 0.6267      | 544.41461  | 13.44718     | 4.8149  |
| 2      | 38.502        | BB   | 0.7234      | 538.08063  | 11.44043     | 4.7589  |
| 3      | 42.831        | VB   | 0.8775      | 5104.59961 | 88.40113     | 45.1458 |
| 4      | 46.831        | BV   | 0.8589      | 5119.81348 | 91.58820     | 45.2804 |

Totals : 1.13069e4 204.87693

=====  
 \*\*\* End of Report \*\*\*

Instrument 1 9/30/2022 10:27:12 AM

Page 1 of 1

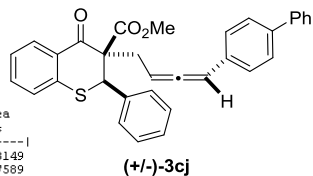

Data File C:\CHEM32\1\DATA\ZHOU-22\YZN021734.D  
 Sample Name: LL-10-74B

=====  
 Acq. Operator :  
 Acq. Instrument : Instrument 1 Location : -  
 Injection Date : 9/30/2022 12:25:01 AM  
 Acq. Method : C:\CHEM32\1\METHODS\DEF\_LC.M  
 Last changed : 9/29/2022 11:54:09 PM  
 (modified after loading)  
 Analysis Method : C:\CHEM32\1\METHODS\DEF\_LC.M  
 Last changed : 9/30/2022 10:23:42 AM  
 (modified after loading)  
 Sample Info : ID+IC, Hexane/i-PrOH = 94/6, 1.0 mL/min, 30 oC, 254 nm

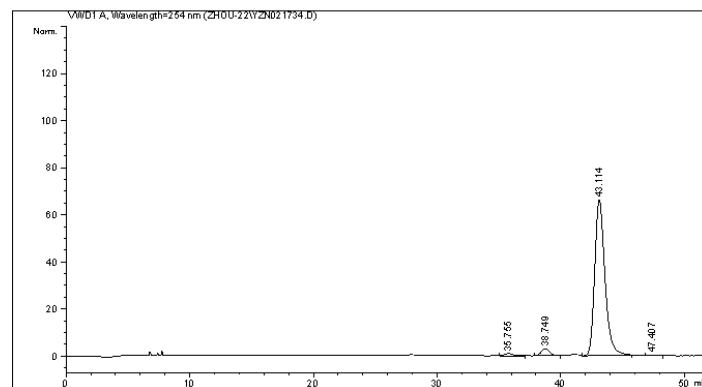

=====  
 Area Percent Report  
 =====

Sorted By : Signal  
 Multiplier: : 1.0000  
 Dilution: : 1.0000  
 Use Multiplier & Dilution Factor with ISTDs

Signal 1: VWD1 A, Wavelength=254 nm

| Peak # | RetTime [min] | Type | Width [min] | Area [mAU] | Height [mAU] | Area %  |
|--------|---------------|------|-------------|------------|--------------|---------|
| 1      | 35.755        | BB   | 0.6426      | 43.35707   | 9.66871e-1   | 1.0808  |
| 2      | 38.749        | BB   | 0.7249      | 145.61395  | 3.07175      | 3.6298  |
| 3      | 43.114        | VB   | 0.8817      | 3812.06421 | 66.17386     | 95.0265 |
| 4      | 47.407        | BB   | 0.5337      | 10.54632   | 2.52585e-1   | 0.2629  |

Totals : 4011.58155 70.46507

=====  
 \*\*\* End of Report \*\*\*

Instrument 1 9/30/2022 10:23:55 AM

Page 1 of 1

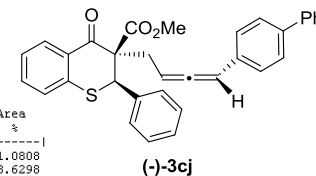

Data File C:\CHEM32\1\DATA\ZHOU-22\YZN021587.D  
 Sample Name: LL-10-53B +/-

=====  
 Acq. Operator :  
 Acq. Instrument : Instrument 1 Location : -  
 Injection Date : 7/29/2022 2:53:24 AM  
 Acq. Method : C:\CHEM32\1\METHODS\DEF\_LC.M  
 Last changed : 7/29/2022 2:52:48 AM  
 (modified after loading)  
 Analysis Method : C:\CHEM32\1\METHODS\DEF\_LC.M  
 Last changed : 7/29/2022 4:35:49 AM  
 (modified after loading)  
 Sample Info : IC, Hexane/i-PrOH = 94/6, 1.0 mL/min, 30 oC, 254 nm

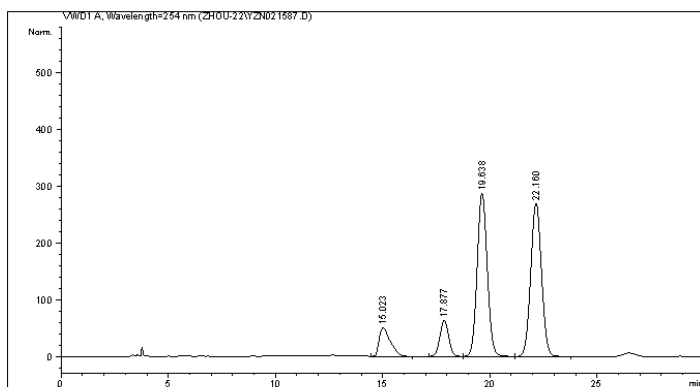

=====  
 Area Percent Report  
 =====

Sorted By : Signal  
 Multiplier: : 1.0000  
 Dilution: : 1.0000  
 Use Multiplier & Dilution Factor with ISTDs

Signal 1: VWD1 A, Wavelength=254 nm

| Peak # | RetTime [min] | Type | Width [min] | Area [mAU] | Height [%] | Area [%] |
|--------|---------------|------|-------------|------------|------------|----------|
| 1      | 15.023        | BB   | 0.5436      | 1811.80005 | 49.99577   | 8.0487   |
| 2      | 17.877        | BV   | 0.4428      | 1806.43420 | 63.45760   | 8.0248   |
| 3      | 19.638        | VV   | 0.5112      | 9447.49902 | 287.71786  | 41.9691  |
| 4      | 22.160        | VB   | 0.5446      | 9444.86133 | 270.23135  | 41.9574  |

Totals : 2.25106e4 671.40259

=====  
 \*\*\* End of Report \*\*\*

Instrument 1 7/29/2022 4:35:55 AM

Page 1 of 1

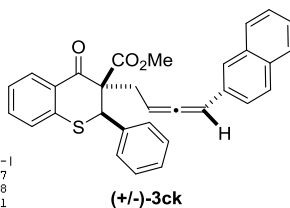

Data File C:\CHEM32\1\DATA\ZHOU-22\YZN021588.D  
 Sample Name: LL-10-53B

=====  
 Acq. Operator :  
 Acq. Instrument : Instrument 1 Location : -  
 Injection Date : 7/29/2022 3:28:15 AM  
 Acq. Method : C:\CHEM32\1\METHODS\DEF\_LC.M  
 Last changed : 7/29/2022 3:26:18 AM  
 (modified after loading)  
 Analysis Method : C:\CHEM32\1\METHODS\DEF\_LC.M  
 Last changed : 7/29/2022 4:34:04 AM  
 (modified after loading)  
 Sample Info : IC, Hexane/i-PrOH = 94/6, 1.0 mL/min, 30 oC, 254 nm

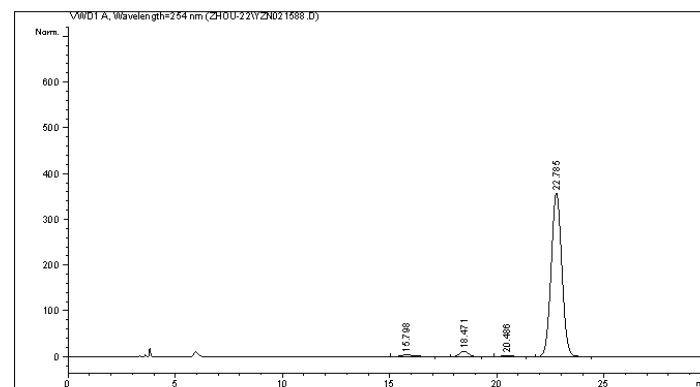

=====  
 Area Percent Report  
 =====

Sorted By : Signal  
 Multiplier: : 1.0000  
 Dilution: : 1.0000  
 Use Multiplier & Dilution Factor with ISTDs

Signal 1: VWD1 A, Wavelength=254 nm

| Peak # | RetTime [min] | Type | Width [min] | Area [mAU] | Height [%] | Area [%] |
|--------|---------------|------|-------------|------------|------------|----------|
| 1      | 15.798        | VB   | 0.6727      | 173.94283  | 3.61031    | 1.3408   |
| 2      | 18.471        | BB   | 0.4384      | 339.25488  | 12.02127   | 2.6150   |
| 3      | 20.486        | BB   | 0.5023      | 89.74234   | 2.76555    | 0.6917   |
| 4      | 22.785        | BB   | 0.5372      | 1.23705e4  | 357.86490  | 95.3525  |

Totals : 1.29734e4 376.26203

=====  
 \*\*\* End of Report \*\*\*

Instrument 1 7/29/2022 4:34:08 AM

Page 1 of 1

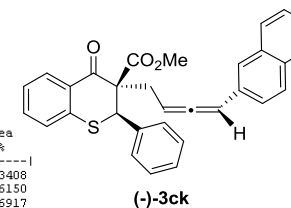

Data File C:\CHEM32\1\DATA\ZHOU-22\YZN021585.D  
 Sample Name: LL-10-53C +/-

=====  
 Acq. Operator :  
 Acq. Instrument : Instrument 1 Location : -  
 Injection Date : 7/28/2022 11:13:46 PM  
 Acq. Method : C:\CHEM32\1\METHODS\DEF\_LC.M  
 Last changed : 7/28/2022 11:11:35 PM  
 (modified after loading)  
 Analysis Method : C:\CHEM32\1\METHODS\DEF\_LC.M  
 Last changed : 7/29/2022 4:48:25 AM  
 (modified after loading)  
 Sample Info : OD-3, Hexane/i-PrOH = 93/7, 0.8 mL/min, 30 oC, 254 nm

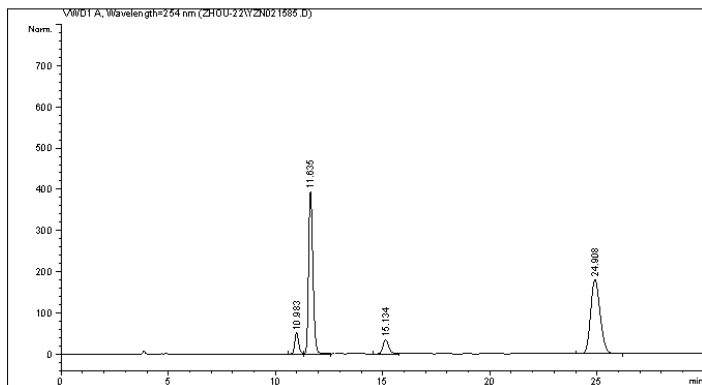

=====  
 Area Percent Report  
 =====

Sorted By : Signal  
 Multiplier: : 1.0000  
 Dilution: : 1.0000  
 Use Multiplier & Dilution Factor with ISTDs

Signal 1: VWD1 A, Wavelength=254 nm

| Peak # | RetTime [min] | Type | Width [min] | Area [mAU] | Height [mAU] | Area %  |
|--------|---------------|------|-------------|------------|--------------|---------|
| 1      | 10.983        | VV   | 0.1991      | 658.74353  | 50.87207     | 5.3293  |
| 2      | 11.635        | VB   | 0.2163      | 5523.64844 | 393.20840    | 44.6868 |
| 3      | 15.134        | VV   | 0.2871      | 649.02606  | 34.62311     | 5.2507  |
| 4      | 24.908        | VB   | 0.4777      | 5529.38184 | 180.06413    | 44.7332 |

Totals : 1.23608e4 658.76772

=====  
 \*\*\* End of Report \*\*\*

Instrument 1 7/29/2022 4:48:29 AM

Page 1 of 1

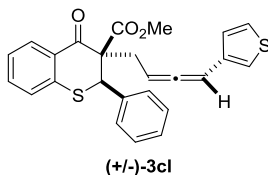

Data File C:\CHEM32\1\DATA\ZHOU-22\YZN021584.D  
 Sample Name: LL-10-53C

=====  
 Acq. Operator :  
 Acq. Instrument : Instrument 1 Location : -  
 Injection Date : 7/28/2022 10:38:21 PM  
 Acq. Method : C:\CHEM32\1\METHODS\DEF\_LC.M  
 Last changed : 7/28/2022 10:37:54 PM  
 (modified after loading)  
 Analysis Method : C:\CHEM32\1\METHODS\DEF\_LC.M  
 Last changed : 7/29/2022 4:46:30 AM  
 (modified after loading)  
 Sample Info : OD-3, Hexane/i-PrOH = 93/7, 0.8 mL/min, 30 oC, 254 nm

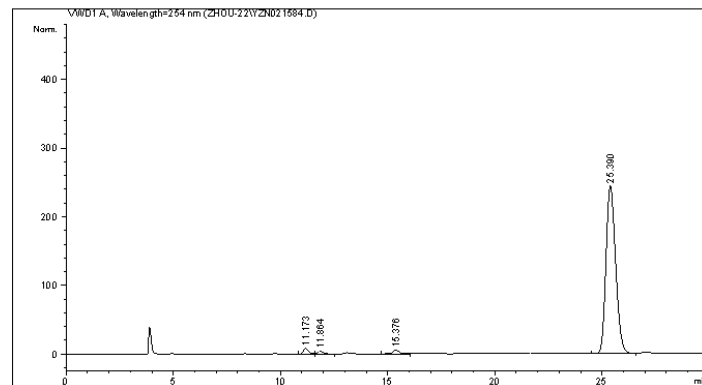

=====  
 Area Percent Report  
 =====

Sorted By : Signal  
 Multiplier: : 1.0000  
 Dilution: : 1.0000  
 Use Multiplier & Dilution Factor with ISTDs

Signal 1: VWD1 A, Wavelength=254 nm

| Peak # | RetTime [min] | Type | Width [min] | Area [mAU] | Height [mAU] | Area %  |
|--------|---------------|------|-------------|------------|--------------|---------|
| 1      | 11.173        | EV   | 0.2393      | 129.58018  | 8.21898      | 1.6320  |
| 2      | 11.864        | VB   | 0.2325      | 64.47478   | 4.24672      | 0.8120  |
| 3      | 15.376        | EV   | 0.3116      | 113.67928  | 5.55369      | 1.4317  |
| 4      | 25.390        | VV   | 0.4868      | 7632.28809 | 244.31071    | 96.1243 |

Totals : 7940.02232 262.33011

=====  
 \*\*\* End of Report \*\*\*

Instrument 1 7/29/2022 4:46:33 AM

Page 1 of 1

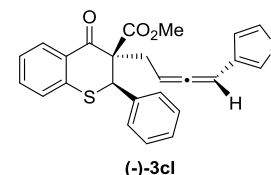



Data File C:\CHEM32\1\DATA\ZHOU-22\YZN021630.D  
 Sample Name: LL-10-63A +/-

=====  
 Acq. Operator :  
 Acq. Instrument : Instrument 1 Location : -  
 Injection Date : 8/25/2022 11:00:22 PM  
 Acq. Method : C:\CHEM32\1\METHODS\DEF\_LC.M  
 Last changed : 8/25/2022 10:59:11 PM  
 (modified after loading)  
 Analysis Method : C:\CHEM32\1\METHODS\DEF\_LC.M  
 Last changed : 8/26/2022 9:11:15 PM  
 (modified after loading)  
 Sample Info : AD-3, Hexane/i-PrOH = 97/3, 0.8 mL/min, 30 oC, 254 nm

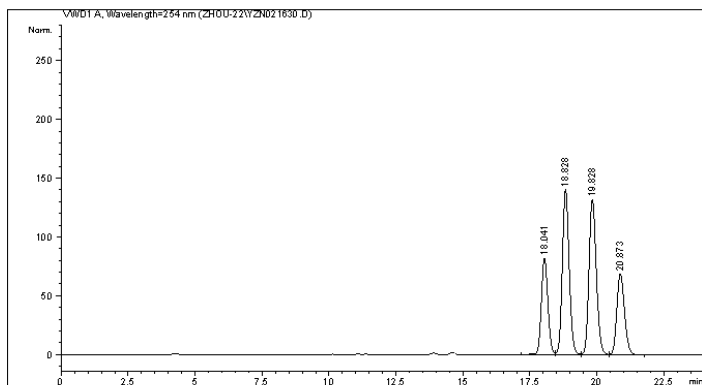

=====  
 Area Percent Report  
 =====

Sorted By : Signal  
 Multiplier: : 1.0000  
 Dilution: : 1.0000  
 Use Multiplier & Dilution Factor with ISTDs

Signal 1: WVD1 A, Wavelength=254 nm

| Peak # | RetTime [min] | Type | Width [min] | Area [mAU*s] | Height [mAU] | Area %  |
|--------|---------------|------|-------------|--------------|--------------|---------|
| 1      | 18.041        | VV   | 0.2632      | 1408.25598   | 82.50092     | 18.0563 |
| 2      | 18.828        | VV   | 0.2746      | 2500.16602   | 140.51218    | 32.0565 |
| 3      | 19.828        | VV   | 0.2947      | 2508.90479   | 131.92908    | 32.1685 |
| 4      | 20.873        | VB   | 0.3121      | 1381.92310   | 69.06464     | 17.7187 |

Totals : 7799.24988 424.00681

=====  
 \*\*\* End of Report \*\*\*

Instrument 1 8/26/2022 9:11:27 PM

Page 1 of 1

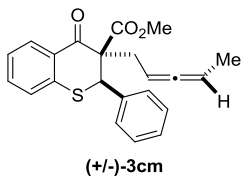

Data File C:\CHEM32\1\DATA\ZHOU-22\YZN021629.D  
 Sample Name: LL-10-63A

=====  
 Acq. Operator :  
 Acq. Instrument : Instrument 1 Location : -  
 Injection Date : 8/25/2022 10:31:46 PM  
 Acq. Method : C:\CHEM32\1\METHODS\DEF\_LC.M  
 Last changed : 8/25/2022 10:13:46 PM  
 (modified after loading)  
 Analysis Method : C:\CHEM32\1\METHODS\DEF\_LC.M  
 Last changed : 8/26/2022 9:29:54 PM  
 (modified after loading)  
 Sample Info : AD-3, Hexane/i-PrOH = 97/3, 0.8 mL/min, 30 oC, 254 nm

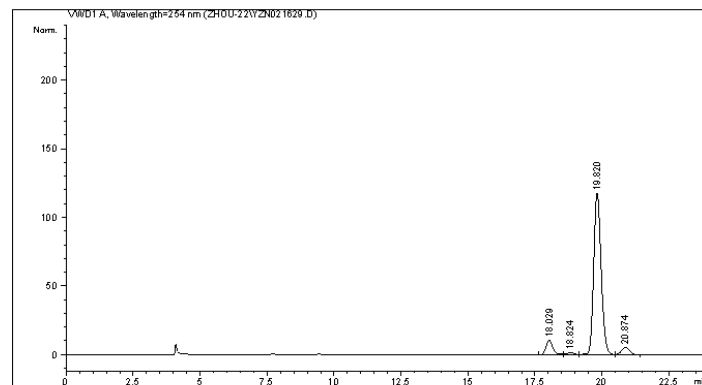

=====  
 Area Percent Report  
 =====

Sorted By : Signal  
 Multiplier: : 1.0000  
 Dilution: : 1.0000  
 Use Multiplier & Dilution Factor with ISTDs

Signal 1: WVD1 A, Wavelength=254 nm

| Peak # | RetTime [min] | Type | Width [min] | Area [mAU*s] | Height [mAU] | Area %  |
|--------|---------------|------|-------------|--------------|--------------|---------|
| 1      | 18.029        | VV   | 0.2715      | 188.61549    | 10.68129     | 7.2438  |
| 2      | 18.824        | VV   | 0.2767      | 30.36503     | 1.68906      | 1.1662  |
| 3      | 19.820        | VV   | 0.2983      | 2274.95874   | 117.72143    | 87.3704 |
| 4      | 20.874        | VB   | 0.3135      | 109.87061    | 5.39045      | 4.2196  |

Totals : 2603.80988 135.48223

=====  
 \*\*\* End of Report \*\*\*

Instrument 1 8/26/2022 9:31:10 PM

Page 1 of 1

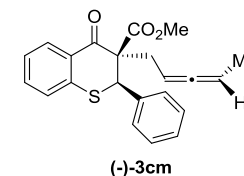

Data File C:\CHEM32\1\DATA\ZHOU-22\YZN022804.D  
 Sample Name: LL-12-21B +/-

=====  
 Acq. Operator :  
 Acq. Instrument : Instrument 1 Location : -  
 Injection Date : 4/2/2023 4:16:47 AM  
 Acq. Method : C:\CHEM32\1\METHODS\DEF\_LC.M  
 Last changed : 4/2/2023 3:58:06 AM  
 (modified after loading)  
 Analysis Method : C:\CHEM32\1\METHODS\DEF\_LC.M  
 Last changed : 4/7/2023 8:20:59 AM  
 (modified after loading)  
 Sample Info : AD-H, Hexane/i-PrOH = 96/4, 1.0 mL/min, 30 oC, 254 nm

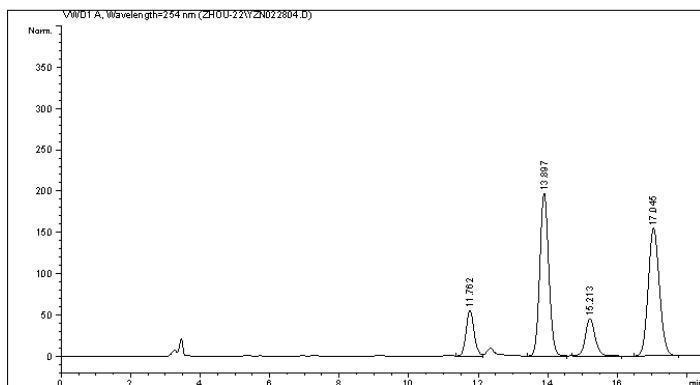

=====  
 Area Percent Report  
 =====

Sorted By : Signal  
 Multiplier: : 1.0000  
 Dilution: : 1.0000  
 Use Multiplier & Dilution Factor with ISTDs

Signal 1: VWD1 A, Wavelength=254 nm

| Peak # | RetTime [min] | Type | Width [min] | Area [mAU*s] | Height [mAU] | Area %  |
|--------|---------------|------|-------------|--------------|--------------|---------|
| 1      | 11.762        | VV   | 0.2461      | 884.03217    | 55.33675     | 10.0786 |
| 2      | 13.897        | BB   | 0.2779      | 3541.40186   | 197.28014    | 40.3747 |
| 3      | 15.213        | BB   | 0.2984      | 885.45581    | 45.20324     | 10.0949 |
| 4      | 17.045        | BB   | 0.3474      | 3460.45874   | 154.38235    | 39.4518 |

Totals : 8771.34857 452.20248

=====  
 \*\*\* End of Report \*\*\*

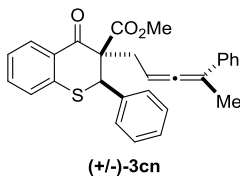

Data File C:\CHEM32\1\DATA\ZHOU-22\YZN022838.D  
 Sample Name: LL-12-21B

=====  
 Acq. Operator :  
 Acq. Instrument : Instrument 1 Location : -  
 Injection Date : 4/7/2023 2:08:13 AM  
 Acq. Method : C:\CHEM32\1\METHODS\DEF\_LC.M  
 Last changed : 4/7/2023 1:43:00 AM  
 (modified after loading)  
 Analysis Method : C:\CHEM32\1\METHODS\DEF\_LC.M  
 Last changed : 4/7/2023 8:22:14 AM  
 (modified after loading)  
 Sample Info : AD-H, Hexane/i-PrOH = 96/4, 1.0 mL/min, 30 oC, 254 nm

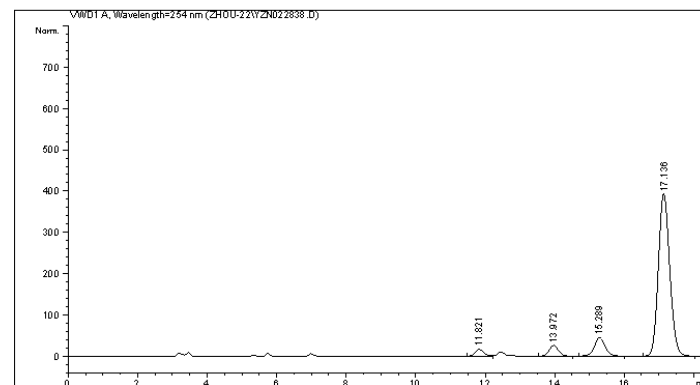

=====  
 Area Percent Report  
 =====

Sorted By : Signal  
 Multiplier: : 1.0000  
 Dilution: : 1.0000  
 Use Multiplier & Dilution Factor with ISTDs

Signal 1: VWD1 A, Wavelength=254 nm

| Peak # | RetTime [min] | Type | Width [min] | Area [mAU*s] | Height [mAU] | Area %  |
|--------|---------------|------|-------------|--------------|--------------|---------|
| 1      | 11.821        | EV   | 0.2516      | 282.20267    | 16.90334     | 2.6509  |
| 2      | 13.972        | BB   | 0.2823      | 473.63223    | 26.01060     | 4.4492  |
| 3      | 15.289        | BB   | 0.3257      | 954.33020    | 44.54163     | 8.9647  |
| 4      | 17.136        | BB   | 0.3544      | 8935.21973   | 392.48340    | 83.9352 |

Totals : 1.06454e4 479.93896

=====  
 \*\*\* End of Report \*\*\*

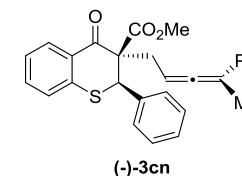

Data File C:\CHEM32\1\DATA\ZHOU-22\YZN021015.D  
 Sample Name: LL-9-57C +/-

=====  
 Acq. Operator :  
 Acq. Instrument : Instrument 1 Location : -  
 Injection Date : 4/21/2022 9:12:58 AM  
 Acq. Method : C:\CHEM32\1\METHODS\DEF\_LC.M  
 Last changed : 4/21/2022 9:06:36 AM  
 (modified after loading)  
 Analysis Method : C:\CHEM32\1\METHODS\DEF\_LC.M  
 Last changed : 1/6/2023 8:34:42 PM  
 (modified after loading)  
 Sample Info : IA, Hexane/i-PrOH = 94/6, 1.0 mL/min, 30 oC, 254 nm

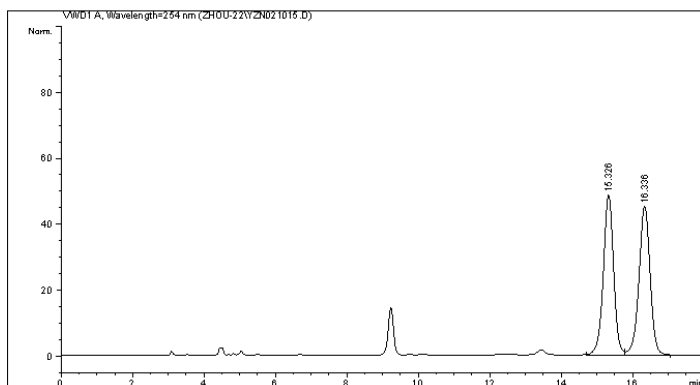

=====  
 Area Percent Report  
 =====

Sorted By : Signal  
 Multiplier: : 1.0000  
 Dilution: : 1.0000  
 Use Multiplier & Dilution Factor with ISTDs

Signal 1: VWD1 A, Wavelength=254 nm

| Peak # | RetTime [min] | Type | Width [min] | Area [mAU] | Height [%] | Area [%] |
|--------|---------------|------|-------------|------------|------------|----------|
| 1      | 15.326        | BV   | 0.3082      | 973.04175  | 48.52695   | 49.8425  |
| 2      | 16.336        | VB   | 0.3318      | 979.19135  | 45.12582   | 50.1575  |

Totals : 1952.23309 93.65277

=====  
 \*\*\* End of Report \*\*\*

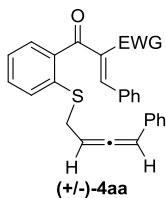

Data File C:\CHEM32\1\DATA\ZHOU-22\YZN021016.D  
 Sample Name: LL-9-57C

=====  
 Acq. Operator :  
 Acq. Instrument : Instrument 1 Location : -  
 Injection Date : 4/21/2022 9:32:34 AM  
 Acq. Method : C:\CHEM32\1\METHODS\DEF\_LC.M  
 Last changed : 4/21/2022 9:31:05 AM  
 (modified after loading)  
 Analysis Method : C:\CHEM32\1\METHODS\DEF\_LC.M  
 Last changed : 1/6/2023 8:35:12 PM  
 (modified after loading)  
 Sample Info : IA, Hexane/i-PrOH = 94/6, 1.0 mL/min, 30 oC, 254 nm

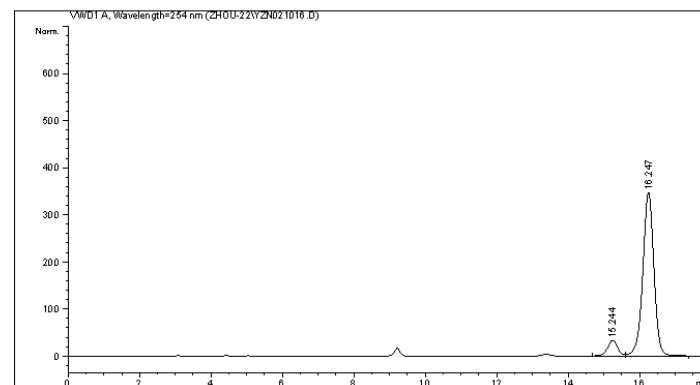

=====  
 Area Percent Report  
 =====

Sorted By : Signal  
 Multiplier: : 1.0000  
 Dilution: : 1.0000  
 Use Multiplier & Dilution Factor with ISTDs

Signal 1: VWD1 A, Wavelength=254 nm

| Peak # | RetTime [min] | Type | Width [min] | Area [mAU] | Height [%] | Area [%] |
|--------|---------------|------|-------------|------------|------------|----------|
| 1      | 15.244        | BV   | 0.3005      | 657.08240  | 33.45493   | 8.0540   |
| 2      | 16.247        | VB   | 0.3304      | 7501.42480 | 347.58792  | 91.9460  |

Totals : 8158.50720 381.04285

=====  
 \*\*\* End of Report \*\*\*

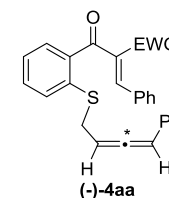

Data File C:\CHEM32\1\DATA\ZHOU-22\YZN021872.D  
 Sample Name: LL-11-4 +/-

=====  
 Acq. Operator :  
 Acq. Instrument : Instrument 1 Location : -  
 Injection Date : 10/24/2022 10:30:45 PM  
 Acq. Method : C:\CHEM32\1\METHODS\DEF\_LC.M  
 Last changed : 10/24/2022 10:29:24 PM  
 (modified after loading)  
 Analysis Method : C:\CHEM32\1\METHODS\DEF\_LC.M  
 Last changed : 10/24/2022 11:53:01 PM  
 (modified after loading)  
 Sample Info : AD-3, Hexane/i-PrOH = 70/30, 0.7 mL/min, 30 oC, 254 nm

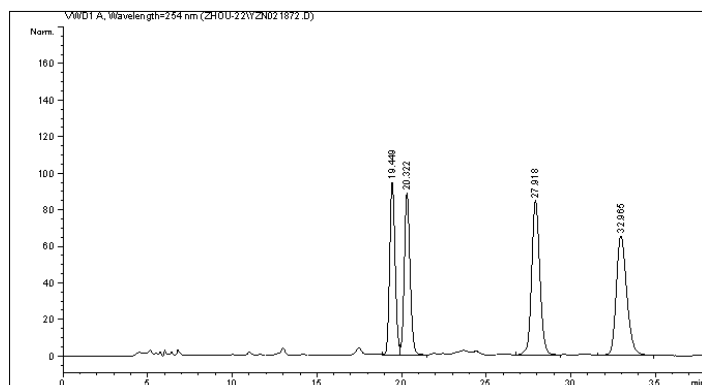

=====  
 Area Percent Report  
 =====

Sorted By : Signal  
 Multiplier: : 1.0000  
 Dilution: : 1.0000  
 Use Multiplier & Dilution Factor with ISTDs

Signal 1: VWD1 A, Wavelength=254 nm

| Peak # | RetTime [min] | Type | Width [min] | Area [mAU] | Height [%] | Area %  |
|--------|---------------|------|-------------|------------|------------|---------|
| 1      | 19.449        | VV   | 0.3459      | 2128.38428 | 94.98555   | 21.3251 |
| 2      | 20.322        | VV   | 0.3698      | 2130.66040 | 88.91367   | 21.3479 |
| 3      | 27.918        | VB   | 0.5186      | 2875.06445 | 84.64687   | 28.8064 |
| 4      | 32.965        | VB   | 0.6695      | 2846.55029 | 65.57854   | 28.5207 |

Totals : 9980.65942 334.12463

=====  
 \*\*\* End of Report \*\*\*

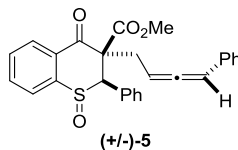

Data File C:\CHEM32\1\DATA\ZHOU-22\YZN021871.D  
 Sample Name: LL-11-4

=====  
 Acq. Operator :  
 Acq. Instrument : Instrument 1 Location : -  
 Injection Date : 10/24/2022 9:50:34 PM  
 Acq. Method : C:\CHEM32\1\METHODS\DEF\_LC.M  
 Last changed : 10/24/2022 9:29:28 PM  
 (modified after loading)  
 Analysis Method : C:\CHEM32\1\METHODS\DEF\_LC.M  
 Last changed : 10/24/2022 11:54:40 PM  
 (modified after loading)  
 Sample Info : AD-3, Hexane/i-PrOH = 70/30, 0.7 mL/min, 30 oC, 254 nm

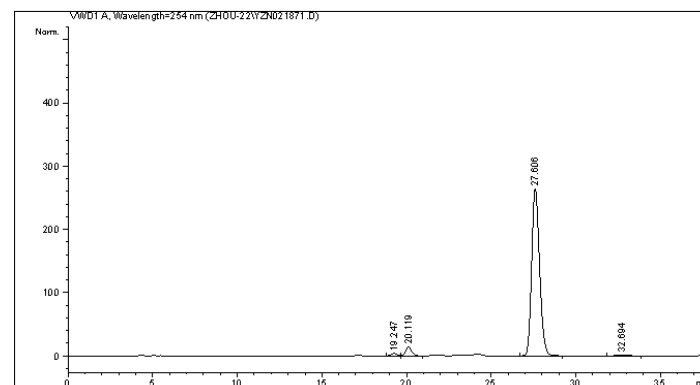

=====  
 Area Percent Report  
 =====

Sorted By : Signal  
 Multiplier: : 1.0000  
 Dilution: : 1.0000  
 Use Multiplier & Dilution Factor with ISTDs

Signal 1: VWD1 A, Wavelength=254 nm

| Peak # | RetTime [min] | Type | Width [min] | Area [mAU] | Height [%] | Area %  |
|--------|---------------|------|-------------|------------|------------|---------|
| 1      | 19.247        | EV   | 0.3477      | 84.40138   | 3.78293    | 0.9343  |
| 2      | 20.119        | VB   | 0.3672      | 331.54840  | 14.11645   | 3.6701  |
| 3      | 27.606        | EB   | 0.5067      | 8566.81055 | 264.04214  | 94.8319 |
| 4      | 32.694        | BB   | 0.7352      | 50.92006   | 1.03840    | 0.5637  |

Totals : 9033.68039 282.97992

=====  
 \*\*\* End of Report \*\*\*

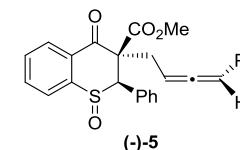

Data File C:\CHEM32\1\DATA\ZHOU-22\YZN021841.D  
 Sample Name: LL-11-5 +/-

=====  
 Acq. Operator :  
 Acq. Instrument : Instrument 1 Location : -  
 Injection Date : 10/22/2022 3:08:51 AM  
 Acq. Method : C:\CHEM32\1\METHODS\DEF\_LC.M  
 Last changed : 10/22/2022 3:04:06 AM  
 (modified after loading)  
 Analysis Method : C:\CHEM32\1\METHODS\DEF\_LC.M  
 Last changed : 10/22/2022 10:51:46 PM  
 (modified after loading)  
 Sample Info : IC, Hexane/i-PrOH = 65/35, 0.8 mL/min, 30 oC, 254 nm

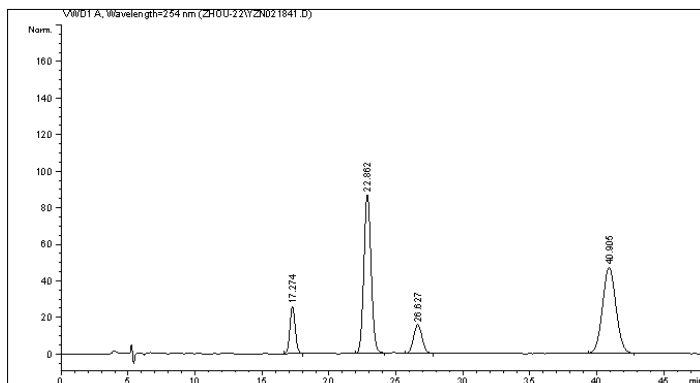

=====  
 Area Percent Report  
 =====

Sorted By : Signal  
 Multiplier: : 1.0000  
 Dilution: : 1.0000  
 Use Multiplier & Dilution Factor with ISTDs

Signal 1: VWD1 A, Wavelength=254 nm

| Peak # | RetTime [min] | Type | Width [min] | Area [mAU] | Height [%] | Area %  |
|--------|---------------|------|-------------|------------|------------|---------|
| 1      | 17.274        | BB   | 0.4320      | 715.35370  | 25.74029   | 8.9740  |
| 2      | 22.862        | BB   | 0.5889      | 3294.61182 | 86.98376   | 41.3303 |
| 3      | 26.627        | BB   | 0.6896      | 700.55835  | 15.74153   | 8.7884  |
| 4      | 40.905        | BB   | 1.0814      | 3260.90479 | 46.85238   | 40.9074 |

Totals : 7971.42865 175.31795

=====  
 \*\*\* End of Report \*\*\*

Instrument 1 10/22/2022 10:51:52 PM

Page 1 of 1

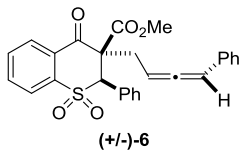

Data File C:\CHEM32\1\DATA\ZHOU-22\YZN021840.D  
 Sample Name: LL-11-5

=====  
 Acq. Operator :  
 Acq. Instrument : Instrument 1 Location : -  
 Injection Date : 10/22/2022 2:15:24 AM  
 Acq. Method : C:\CHEM32\1\METHODS\DEF\_LC.M  
 Last changed : 10/22/2022 1:41:04 AM  
 (modified after loading)  
 Analysis Method : C:\CHEM32\1\METHODS\DEF\_LC.M  
 Last changed : 10/22/2022 10:53:50 PM  
 (modified after loading)  
 Sample Info : IC, Hexane/i-PrOH = 65/35, 0.8 mL/min, 30 oC, 254 nm

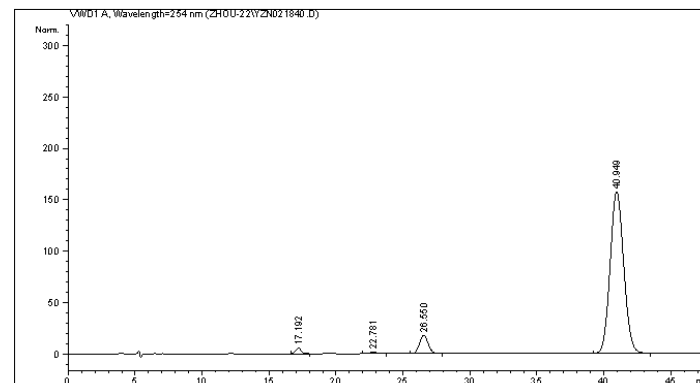

=====  
 Area Percent Report  
 =====

Sorted By : Signal  
 Multiplier: : 1.0000  
 Dilution: : 1.0000  
 Use Multiplier & Dilution Factor with ISTDs

Signal 1: VWD1 A, Wavelength=254 nm

| Peak # | RetTime [min] | Type | Width [min] | Area [mAU] | Height [%] | Area %  |
|--------|---------------|------|-------------|------------|------------|---------|
| 1      | 17.192        | BB   | 0.4332      | 159.04973  | 5.70220    | 1.3105  |
| 2      | 22.781        | BB   | 0.6010      | 60.96534   | 1.57199    | 0.5023  |
| 3      | 26.550        | BB   | 0.7082      | 808.95935  | 17.88644   | 6.6653  |
| 4      | 40.949        | BB   | 1.1047      | 1.11079e4  | 157.05879  | 91.5219 |

Totals : 1.21369e4 182.21943

=====  
 \*\*\* End of Report \*\*\*

Instrument 1 10/22/2022 10:55:27 PM

Page 1 of 1

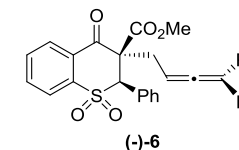

Data File C:\CHEM32\1\DATA\ZHOU-22\YZN021917.D  
 Sample Name: LL-11-16 +/-

=====  
 Acq. Operator :  
 Acq. Instrument : Instrument 1 Location : -  
 Injection Date : 10/30/2022 3:52:27 AM  
 Acq. Method : C:\CHEM32\1\METHODS\DEF\_LC.M  
 Last changed : 10/30/2022 3:50:56 AM  
 (modified after loading)  
 Analysis Method : C:\CHEM32\1\METHODS\DEF\_LC.M  
 Last changed : 10/30/2022 4:16:07 AM  
 (modified after loading)  
 Sample Info : AD-H, Hexane/i-PrOH = 95/5, 1.0 mL/min, 30 oC, 254 nm

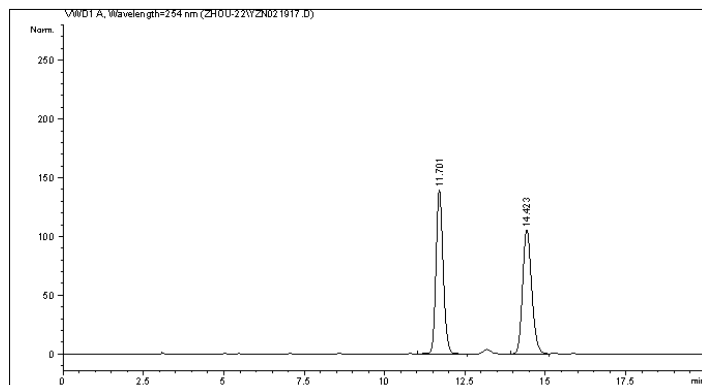

=====  
 Area Percent Report  
 =====

Sorted By : Signal  
 Multiplier: : 1.0000  
 Dilution: : 1.0000  
 Use Multiplier & Dilution Factor with ISTDs

Signal 1: VWD1 A, Wavelength=254 nm

| Peak # | RetTime [min] | Type | Width [min] | Area [mAU] | Height [%] | Area [%] |
|--------|---------------|------|-------------|------------|------------|----------|
| 1      | 11.701        | VB   | 0.2371      | 2156.65771 | 139.52293  | 50.8865  |
| 2      | 14.423        | VV   | 0.3026      | 2081.51245 | 105.66568  | 49.1135  |

Totals : 4238.17017 245.18861

=====  
 \*\*\* End of Report \*\*\*

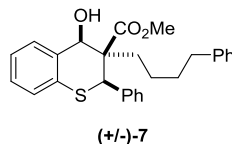

Instrument 1 10/30/2022 4:16:15 AM

Page 1 of 1

Data File C:\CHEM32\1\DATA\ZHOU-22\YZN021916.D  
 Sample Name: LL-11-16

=====  
 Acq. Operator :  
 Acq. Instrument : Instrument 1 Location : -  
 Injection Date : 10/30/2022 3:28:32 AM  
 Acq. Method : C:\CHEM32\1\METHODS\DEF\_LC.M  
 Last changed : 10/30/2022 3:04:05 AM  
 (modified after loading)  
 Analysis Method : C:\CHEM32\1\METHODS\DEF\_LC.M  
 Last changed : 10/30/2022 4:17:32 AM  
 (modified after loading)  
 Sample Info : AD-H, Hexane/i-PrOH = 95/5, 1.0 mL/min, 30 oC, 254 nm

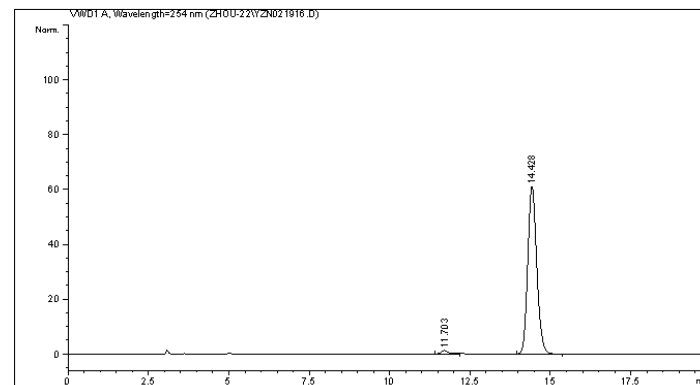

=====  
 Area Percent Report  
 =====

Sorted By : Signal  
 Multiplier: : 1.0000  
 Dilution: : 1.0000  
 Use Multiplier & Dilution Factor with ISTDs

Signal 1: VWD1 A, Wavelength=254 nm

| Peak # | RetTime [min] | Type | Width [min] | Area [mAU] | Height [%] | Area [%] |
|--------|---------------|------|-------------|------------|------------|----------|
| 1      | 11.703        | VB   | 0.2459      | 19.75402   | 1.21869    | 1.6311   |
| 2      | 14.428        | EB   | 0.3005      | 1191.35352 | 61.03853   | 98.3689  |

Totals : 1211.10754 62.25722

=====  
 \*\*\* End of Report \*\*\*

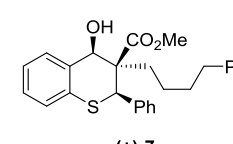

Instrument 1 10/30/2022 4:17:48 AM

Page 1 of 1

Data File C:\CHEM32\1\DATA\ZHOU-22\YZN022147.D  
 Sample Name: LL-11-44 +/-

=====  
 Acq. Operator :  
 Acq. Instrument : Instrument 1 Location : -  
 Injection Date : 11/30/2022 11:30:47 PM  
 Acq. Method : C:\CHEM32\1\METHODS\DEF\_LC.M  
 Last changed : 11/30/2022 11:29:14 PM  
 (modified after loading)  
 Analysis Method : C:\CHEM32\1\METHODS\DEF\_LC.M  
 Last changed : 12/1/2022 2:31:03 AM  
 (modified after loading)  
 Sample Info : IA+AS-H, Hexane/i-PrOH = 95/5, 0.8 mL/min, 30 oC, 254 n  
 m

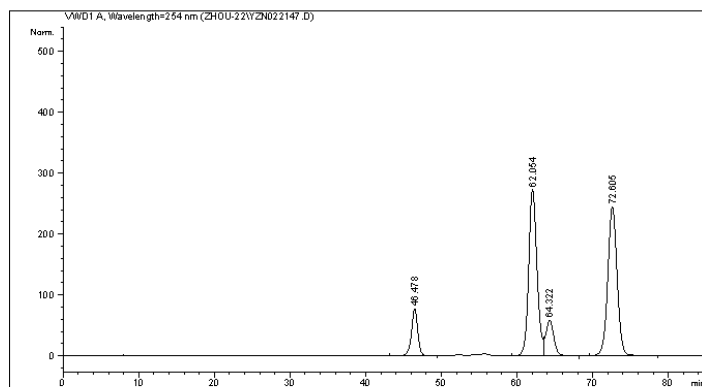

=====  
 Area Percent Report  
 =====

Sorted By : Signal  
 Multiplier: : 1.0000  
 Dilution: : 1.0000  
 Use Multiplier & Dilution Factor with ISTDs

Signal 1: VWD1 A, Wavelength=254 nm

| Peak #   | RetTime [min] | Type | Width [min] | Area [mAU] | %         | Height [mAU] | Area % |
|----------|---------------|------|-------------|------------|-----------|--------------|--------|
| 1        | 46.478        | BB   | 0.8766      | 4460.64746 | 77.35817  | 8.8316       |        |
| 2        | 62.054        | BV   | 1.1644      | 2.06928e4  | 272.83978 | 40.9695      |        |
| 3        | 64.322        | VB   | 1.1556      | 4356.79199 | 58.02239  | 8.6260       |        |
| 4        | 72.605        | BB   | 1.3270      | 2.09975e4  | 244.75700 | 41.5729      |        |
| Totals : |               |      |             | 5.05077e4  | 652.97735 |              |        |

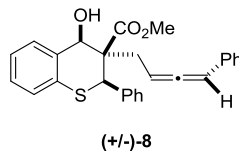

=====  
 \*\*\* End of Report \*\*\*

Instrument 1 12/1/2022 2:31:11 AM

Page 1 of 1

Data File C:\CHEM32\1\DATA\ZHOU-22\YZN022146.D  
 Sample Name: LL-11-44

=====  
 Acq. Operator :  
 Acq. Instrument : Instrument 1 Location : -  
 Injection Date : 11/30/2022 9:53:50 PM  
 Acq. Method : C:\CHEM32\1\METHODS\DEF\_LC.M  
 Last changed : 11/30/2022 9:51:30 PM  
 (modified after loading)  
 Analysis Method : C:\CHEM32\1\METHODS\DEF\_LC.M  
 Last changed : 12/1/2022 2:28:53 AM  
 (modified after loading)  
 Sample Info : IA+AS-H, Hexane/i-PrOH = 95/5, 0.8 mL/min, 30 oC, 254 n  
 m

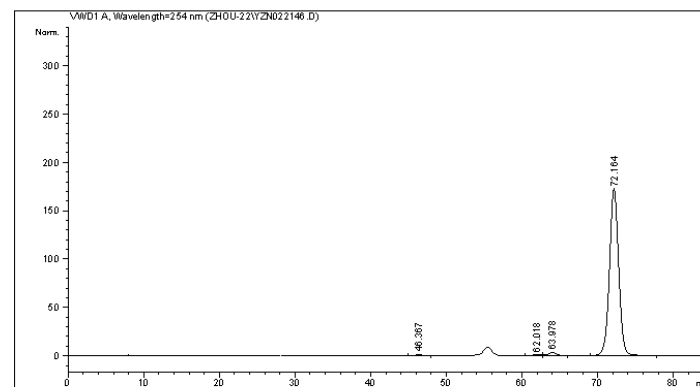

=====  
 Area Percent Report  
 =====

Sorted By : Signal  
 Multiplier: : 1.0000  
 Dilution: : 1.0000  
 Use Multiplier & Dilution Factor with ISTDs

Signal 1: VWD1 A, Wavelength=254 nm

| Peak #   | RetTime [min] | Type | Width [min] | Area [mAU] | %          | Height [mAU] | Area % |
|----------|---------------|------|-------------|------------|------------|--------------|--------|
| 1        | 46.367        | BB   | 0.8741      | 62.76188   | 1.09244    | 0.4206       |        |
| 2        | 62.018        | BV   | 1.1131      | 68.22928   | 9.22701e-1 | 0.4573       |        |
| 3        | 63.978        | VB   | 1.1444      | 235.30170  | 3.15277    | 1.5770       |        |
| 4        | 72.164        | BB   | 1.2935      | 1.45549e4  | 172.42085  | 97.5451      |        |
| Totals : |               |      |             | 1.49212e4  | 177.58876  |              |        |

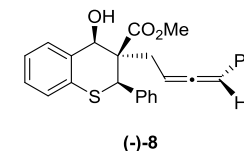

=====  
 \*\*\* End of Report \*\*\*

Instrument 1 12/1/2022 2:28:56 AM

Page 1 of 1
